# Supplementary material for: Identification of Novel QTL Conferring Sheath Blight Resistance in Two Weedy Rice Mapping Populations
Source: Rice (N Y). 2020 Mar 23;13:21. doi: 10.1186/s12284-020-00381-9 (PMC7090113; doi:10.1186/s12284-020-00381-9)
Supplement: Supplementary file 1 — Additional file 1: Table S1. Functionally characterized genes from the QTARO database. Candidate genes for each QTL are highlighted in yellow. [file 12284_2020_381_MOESM1_ESM.xlsx]

## Sheet: Sheet1
					func
qShB1-2	Chr1	6813714	6815546	LOC_Os01g12440
qShB1-2	Chr1	6830104	6832770	LOC_Os01g12460
qShB1-2	Chr1	6833050	6835300	LOC_Os01g12464
qShB1-2	Chr1	6837120	6841269	LOC_Os01g12470
qShB1-2	Chr1	6841526	6843538	LOC_Os01g12480
qShB1-2	Chr1	6857032	6860962	LOC_Os01g12490
qShB1-2	Chr1	6863321	6863747	LOC_Os01g12500
qShB1-2	Chr1	6875888	6876100	LOC_Os01g12510
qShB1-2	Chr1	6879905	6881968	LOC_Os01g12520
qShB1-2	Chr1	6889351	6896414	LOC_Os01g12530
qShB1-2	Chr1	6897557	6904259	LOC_Os01g12540
qShB1-2	Chr1	6904506	6909594	LOC_Os01g12550
qShB1-2	Chr1	6909691	6912131	LOC_Os01g12560
qShB1-2	Chr1	6912704	6915127	LOC_Os01g12570
qShB1-2	Chr1	6922082	6923336	LOC_Os01g12580
qShB1-2	Chr1	6928001	6934154	LOC_Os01g12590
qShB1-2	Chr1	6934782	6938200	LOC_Os01g12600
qShB1-2	Chr1	6940383	6940772	LOC_Os01g12610
qShB1-2	Chr1	6954748	6955074	LOC_Os01g12630
qShB1-2	Chr1	6957017	6958745	LOC_Os01g12640
qShB1-2	Chr1	6967620	6970164	LOC_Os01g12650
qShB1-2	Chr1	6970861	6976710	LOC_Os01g12660
qShB1-2	Chr1	6979613	6985778	LOC_Os01g12670
qShB1-2	Chr1	6987901	6994006	LOC_Os01g12680
qShB1-2	Chr1	7009033	7010505	LOC_Os01g12690
qShB1-2	Chr1	7015131	7018379	LOC_Os01g12700
qShB1-2	Chr1	7024297	7030610	LOC_Os01g12710	non-yellow coloring1	nyc1	Physiological trait	Source activity	1	7023277	7029571	Os01g0227100	-	Mutant	Chlorophyll degradation during senescence.	10.1105/tpc.106.042911
qShB1-2	Chr1	7038103	7042925	LOC_Os01g12720
qShB1-2	Chr1	7043932	7047559	LOC_Os01g12730
qShB1-2	Chr1	7048273	7050877	LOC_Os01g12740
qShB1-2	Chr1	7053100	7056375	LOC_Os01g12750
qShB1-2	Chr1	7061344	7065249	LOC_Os01g12760
qShB1-2	Chr1	7071481	7073789	LOC_Os01g12770
qShB1-2	Chr1	7076271	7076777	LOC_Os01g12780
qShB1-2	Chr1	7079900	7085596	LOC_Os01g12790
qShB1-2	Chr1	7085842	7089194	LOC_Os01g12800
qShB1-2	Chr1	7092032	7095355	LOC_Os01g12810
qShB1-2	Chr1	7095374	7097654	LOC_Os01g12820
qShB1-2	Chr1	7100013	7103266	LOC_Os01g12830
qShB1-2	Chr1	7104273	7109141	LOC_Os01g12840
qShB1-2	Chr1	7111153	7111440	LOC_Os01g12850
qShB1-2	Chr1	7115771	7124102	LOC_Os01g12860
qShB1-2	Chr1	7125360	7128912	LOC_Os01g12870
qShB1-2	Chr1	7129149	7137330	LOC_Os01g12880
qShB1-2	Chr1	7157780	7164385	LOC_Os01g12890
qShB1-2	Chr1	7164594	7167419	LOC_Os01g12900	OsRac1	OsRac1	Resistance or Tolerance	Blast resistance	1	7163722	7166399	Os01g0229400	-	Knockdown Overexpression	Bacterial blight and blast resistance. Production of reactive oxygen intermediates.	10.1073/pnas.98.2.759
qShB1-2	Chr1	7173618	7175813	LOC_Os01g12910
qShB1-2	Chr1	7176107	7177066	LOC_Os01g12920
qShB1-2	Chr1	7177355	7183963	LOC_Os01g12930
qShB1-2	Chr1	7185483	7188038	LOC_Os01g12940
qShB1-2	Chr1	7197022	7214143	LOC_Os01g12950
qShB1-2	Chr1	7215369	7215995	LOC_Os01g12990
qShB1-2	Chr1	7216513	7225223	LOC_Os01g13000
qShB1-2	Chr1	7236012	7236450	LOC_Os01g13010
qShB1-2	Chr1	7239721	7240957	LOC_Os01g13020
qShB1-2	Chr1	7244980	7246003	LOC_Os01g13024
qShB1-2	Chr1	7249761	7254629	LOC_Os01g13030
qShB1-2	Chr1	7259786	7260671	LOC_Os01g13040
qShB1-2	Chr1	7263022	7263843	LOC_Os01g13050
qShB1-2	Chr1	7265228	7273237	LOC_Os01g13060
qShB1-2	Chr1	7276019	7277972	LOC_Os01g13070
qShB1-2	Chr1	7278720	7280250	LOC_Os01g13080
qShB1-2	Chr1	7281734	7285992	LOC_Os01g13090
qShB1-2	Chr1	7287907	7294276	LOC_Os01g13100
qShB1-2	Chr1	7297672	7298971	LOC_Os01g13120
qShB1-2	Chr1	7302368	7303788	LOC_Os01g13130
qShB1-2	Chr1	7307881	7309906	LOC_Os01g13140
qShB1-2	Chr1	7325145	7332536	LOC_Os01g13150
qShB1-2	Chr1	7333691	7339244	LOC_Os01g13160
qShB1-2	Chr1	7340717	7345465	LOC_Os01g13170
qShB1-2	Chr1	7345590	7346978	LOC_Os01g13180
qShB1-2	Chr1	7348563	7352146	LOC_Os01g13190
qShB1-2	Chr1	7352175	7357620	LOC_Os01g13200
qShB1-2	Chr1	7363643	7366111	LOC_Os01g13210
qShB1-2	Chr1	7369672	7374369	LOC_Os01g13229
qShB1-2	Chr1	7385895	7388164	LOC_Os01g13250
qShB1-2	Chr1	7389342	7393708	LOC_Os01g13260
qShB1-2	Chr1	7400509	7404312	LOC_Os01g13270
qShB1-2	Chr1	7404888	7409640	LOC_Os01g13280
qShB1-2	Chr1	7414865	7415354	LOC_Os01g13285
qShB1-2	Chr1	7417303	7422624	LOC_Os01g13300
qShB1-2	Chr1	7424284	7427642	LOC_Os01g13310
qShB1-2	Chr1	7429384	7431486	LOC_Os01g13320
qShB1-2	Chr1	7431934	7433002	LOC_Os01g13330
qShB1-2	Chr1	7437788	7443252	LOC_Os01g13350
qShB1-2	Chr1	7437894	7439704	LOC_Os01g13340
qShB1-2	Chr1	7443685	7447196	LOC_Os01g13360
qShB1-2	Chr1	7450837	7453683	LOC_Os01g13370
qShB1-2	Chr1	7455656	7456090	LOC_Os01g13380
qShB1-2	Chr1	7457835	7459959	LOC_Os01g13390
qShB1-2	Chr1	7460348	7465534	LOC_Os01g13404
qShB1-2	Chr1	7470710	7472743	LOC_Os01g13420
qShB1-2	Chr1	7477641	7482824	LOC_Os01g13430
qShB1-2	Chr1	7484910	7485733	LOC_Os01g13440
qShB1-2	Chr1	7489233	7489949	LOC_Os01g13450
qShB1-2	Chr1	7495057	7498391	LOC_Os01g13460
qShB1-2	Chr1	7506213	7511768	LOC_Os01g13470
qShB1-2	Chr1	7517210	7518741	LOC_Os01g13480
qShB1-2	Chr1	7519617	7524433	LOC_Os01g13490
qShB1-2	Chr1	7528649	7530136	LOC_Os01g13500
qShB1-2	Chr1	7543671	7544510	LOC_Os01g13510
qShB1-2	Chr1	7546885	7551996	LOC_Os01g13520
qShB1-2	Chr1	7557172	7560626	LOC_Os01g13530
qShB1-2	Chr1	7571236	7576817	LOC_Os01g13540
qShB1-2	Chr1	7578091	7582923	LOC_Os01g13550
qShB1-2	Chr1	7588191	7589633	LOC_Os01g13560
qShB1-2	Chr1	7590399	7592760	LOC_Os01g13570
qShB1-2	Chr1	7602829	7603348	LOC_Os01g13590
qShB1-2	Chr1	7605362	7606545	LOC_Os01g13600
qShB1-2	Chr1	7619080	7624561	LOC_Os01g13610
qShB1-2	Chr1	7635648	7640915	LOC_Os01g13620
qShB1-2	Chr1	7641517	7643124	LOC_Os01g13630
qShB1-2	Chr1	7648657	7650004	LOC_Os01g13640
qShB1-2	Chr1	7650663	7652075	LOC_Os01g13650
qShB1-2	Chr1	7652869	7656854	LOC_Os01g13660
qShB1-2	Chr1	7657718	7658062	LOC_Os01g13670
qShB1-2	Chr1	7661046	7661285	LOC_Os01g13680
qShB1-2	Chr1	7665101	7668163	LOC_Os01g13690
qShB1-2	Chr1	7670066	7672762	LOC_Os01g13700
qShB1-2	Chr1	7672983	7676403	LOC_Os01g13710
qShB1-2	Chr1	7677147	7678869	LOC_Os01g13720
qShB1-2	Chr1	7679030	7685923	LOC_Os01g13730
qShB1-2	Chr1	7686884	7693987	LOC_Os01g13740
qShB1-2	Chr1	7712339	7721253	LOC_Os01g13760
qShB1-2	Chr1	7718189	7722451	LOC_Os01g13770
qShB1-2	Chr1	7724283	7725533	LOC_Os01g13780
qShB1-2	Chr1	7739074	7742914	LOC_Os01g13800
qShB1-2	Chr1	7744243	7747746	LOC_Os01g13810
qShB1-2	Chr1	7749404	7754414	LOC_Os01g13820
qShB1-2	Chr1	7755841	7760520	LOC_Os01g13830
qShB1-2	Chr1	7764433	7766034	LOC_Os01g13840
qShB1-2	Chr1	7767025	7767753	LOC_Os01g13850
qShB1-2	Chr1	7771960	7774282	LOC_Os01g13860
qShB1-2	Chr1	7776045	7777328	LOC_Os01g13870
qShB1-2	Chr1	7780251	7781054	LOC_Os01g13880
qShB1-2	Chr1	7782803	7788695	LOC_Os01g13890
qShB1-2	Chr1	7789318	7790571	LOC_Os01g13900
qShB1-2	Chr1	7792032	7794446	LOC_Os01g13910
qShB1-2	Chr1	7796268	7796690	LOC_Os01g13920
qShB1-2	Chr1	7804166	7805842	LOC_Os01g13930
qShB1-2	Chr1	7806630	7810972	LOC_Os01g13940
qShB1-2	Chr1	7817704	7818394	LOC_Os01g13950
qShB1-2	Chr1	7823251	7827552	LOC_Os01g13960
qShB1-2	Chr1	7828417	7832217	LOC_Os01g13970
qShB1-2	Chr1	7832349	7833817	LOC_Os01g13980
qShB1-2	Chr1	7837298	7838188	LOC_Os01g13990
qShB1-2	Chr1	7844348	7844658	LOC_Os01g14000
qShB1-2	Chr1	7847742	7850177	LOC_Os01g14010
qShB1-2	Chr1	7852645	7855833	LOC_Os01g14020
qShB1-2	Chr1	7856373	7857612	LOC_Os01g14030
qShB1-2	Chr1	7857826	7860061	LOC_Os01g14040
qShB1-2	Chr1	7862001	7867812	LOC_Os01g14050
qShB1-2	Chr1	7870790	7872213	LOC_Os01g14060
qShB1-2	Chr1	7876233	7878802	LOC_Os01g14070
qShB1-2	Chr1	7879931	7882632	LOC_Os01g14080
qShB1-2	Chr1	7891541	7894725	LOC_Os01g14090
qShB1-2	Chr1	7894959	7900874	LOC_Os01g14100
qShB1-2	Chr1	7903813	7904466	LOC_Os01g14110
qShB1-2	Chr1	7924395	7924787	LOC_Os01g14120
qShB1-2	Chr1	7926594	7927559	LOC_Os01g14130
qShB1-2	Chr1	7928083	7929764	LOC_Os01g14140
qShB1-2	Chr1	7936170	7937575	LOC_Os01g14160
qShB1-2	Chr1	7940376	7943760	LOC_Os01g14170
qShB1-2	Chr1	7945214	7946972	LOC_Os01g14180
qShB1-2	Chr1	7947393	7949803	LOC_Os01g14190
qShB1-2	Chr1	7953423	7964300	LOC_Os01g14200
qShB1-2	Chr1	7969862	7970755	LOC_Os01g14210
qShB1-2	Chr1	7971864	7974941	LOC_Os01g14220
qShB1-2	Chr1	7980642	7981577	LOC_Os01g14230
qShB1-2	Chr1	7984719	7984946	LOC_Os01g14240
qShB1-2	Chr1	7988936	7990102	LOC_Os01g14250
qShB1-2	Chr1	7993040	7997155	LOC_Os01g14260
qShB1-2	Chr1	7997491	8003010	LOC_Os01g14270
qShB1-2	Chr1	8004080	8005216	LOC_Os01g14280
qShB1-2	Chr1	8006875	8009338	LOC_Os01g14290
qShB1-2	Chr1	8012037	8013807	LOC_Os01g14300
qShB1-2	Chr1	8016552	8019035	LOC_Os01g14310
qShB1-2	Chr1	8023787	8024935	LOC_Os01g14320
qShB1-2	Chr1	8030884	8031842	LOC_Os01g14330
qShB1-2	Chr1	8032638	8039690	LOC_Os01g14340
qShB1-2	Chr1	8040956	8041210	LOC_Os01g14360
qShB1-2	Chr1	8047368	8055694	LOC_Os01g14370
qShB1-2	Chr1	8057723	8057935	LOC_Os01g14380
qShB1-2	Chr1	8058784	8059983	LOC_Os01g14390
qShB1-2	Chr1	8060358	8060852	LOC_Os01g14400
qShB1-2	Chr1	8061858	8062908	LOC_Os01g14410
qShB1-2	Chr1	8064796	8069095	LOC_Os01g14420
qShB1-2	Chr1	8071122	8071833	LOC_Os01g14430
qShB1-2	Chr1	8084372	8087044	LOC_Os01g14440
qShB1-2	Chr1	8093599	8097261	LOC_Os01g14450
qShB1-2	Chr1	8097513	8098373	LOC_Os01g14460
qShB1-2	Chr1	8101999	8103480	LOC_Os01g14470
qShB1-2	Chr1	8115555	8120284	LOC_Os01g14490
qShB1-2	Chr1	8125667	8128193	LOC_Os01g14510
qShB1-2	Chr1	8130247	8131090	LOC_Os01g14514
qShB1-2	Chr1	8132697	8135454	LOC_Os01g14520
qShB1-2	Chr1	8146428	8148059	LOC_Os01g14530
qShB1-2	Chr1	8152630	8153685	LOC_Os01g14540
qShB1-2	Chr1	8159849	8161554	LOC_Os01g14550
qShB1-2	Chr1	8163863	8167012	LOC_Os01g14570
qShB1-2	Chr1	8170309	8176392	LOC_Os01g14580
qShB1-2	Chr1	8175375	8177889	LOC_Os01g14590
qShB1-2	Chr1	8178899	8183108	LOC_Os01g14610
qShB1-2	Chr1	8190268	8190654	LOC_Os01g14620
qShB1-2	Chr1	8191077	8192462	LOC_Os01g14630
qShB1-2	Chr1	8193541	8194179	LOC_Os01g14640
qShB1-2	Chr1	8196003	8197164	LOC_Os01g14650	a-expansin gene 8	OsEXPA8	Morphological trait	Culm leaf	1	8195063	8196076	Os01g0248900	-	Overexpression	Root development. Plant height. Leaf size.	10.1371/journal.pone.0075997
qShB1-4	Chr1	20464606	20469249	LOC_Os01g36790
qShB1-4	Chr1	20472809	20474865	LOC_Os01g36800
qShB1-4	Chr1	20477981	20478625	LOC_Os01g36810
qShB1-4	Chr1	20480000	20482782	LOC_Os01g36820
qShB1-4	Chr1	20486362	20488635	LOC_Os01g36830
qShB1-4	Chr1	20489154	20501766	LOC_Os01g36840
qShB1-4	Chr1	20518681	20521541	LOC_Os01g36850
qShB1-4	Chr1	20522447	20528243	LOC_Os01g36860
qShB1-4	Chr1	20535086	20538945	LOC_Os01g36870
qShB1-4	Chr1	20539591	20540440	LOC_Os01g36880
qShB1-4	Chr1	20540829	20547112	LOC_Os01g36890
qShB1-4	Chr1	20549611	20558673	LOC_Os01g36900
qShB1-4	Chr1	20565869	20570030	LOC_Os01g36910
qShB1-4	Chr1	20570953	20576221	LOC_Os01g36920
qShB1-4	Chr1	20581615	20589583	LOC_Os01g36930	ubiquitin specific protease 6	osubp6	Morphological trait	Shoot seedling	1	22238470	22246428	Os01g0550100	-	Mutant	Growth speed during seedling stage.	10.1007/s10059-009-0138-4
qShB1-4	Chr1	20595192	20598852	LOC_Os01g36940
qShB1-4	Chr1	20599314	20602261	LOC_Os01g36950
qShB1-4	Chr1	20612485	20616707	LOC_Os01g36960
qShB1-4	Chr1	20628647	20631891	LOC_Os01g36970
qShB1-4	Chr1	20634295	20639551	LOC_Os01g36984
qShB1-4	Chr1	20640981	20643886	LOC_Os01g37000
qShB1-4	Chr1	20651544	20654884	LOC_Os01g37020
qShB1-4	Chr1	20656425	20656890	LOC_Os01g37030
qShB1-4	Chr1	20662990	20665064	LOC_Os01g37040
qShB1-4	Chr1	20665462	20671097	LOC_Os01g37050
qShB1-4	Chr1	20676064	20682813	LOC_Os01g37060
qShB1-4	Chr1	20685315	20691662	LOC_Os01g37070
qShB1-4	Chr1	20691942	20696077	LOC_Os01g37080
qShB1-4	Chr1	20700553	20703076	LOC_Os01g37090
qShB1-4	Chr1	20705750	20707408	LOC_Os01g37100
qShB1-4	Chr1	20714138	20716708	LOC_Os01g37110
qShB1-4	Chr1	20717034	20722254	LOC_Os01g37120
qShB1-4	Chr1	20738583	20742431	LOC_Os01g37130
qShB1-4	Chr1	20744297	20745785	LOC_Os01g37140
qShB1-4	Chr1	20755356	20756397	LOC_Os01g37160
qShB1-4	Chr1	20760575	20761607	LOC_Os01g37170
qShB1-4	Chr1	20766104	20766457	LOC_Os01g37180
qShB1-4	Chr1	20775474	20776107	LOC_Os01g37200
qShB1-4	Chr1	20783355	20786656	LOC_Os01g37210
qShB1-4	Chr1	20791273	20791500	LOC_Os01g37220
qShB1-4	Chr1	20794282	20797207	LOC_Os01g37230
qShB1-4	Chr1	20797537	20800635	LOC_Os01g37240
qShB1-4	Chr1	20801026	20803654	LOC_Os01g37250
qShB1-4	Chr1	20805790	20810166	LOC_Os01g37260
qShB1-4	Chr1	20813655	20814095	LOC_Os01g37270
qShB1-4	Chr1	20816955	20820446	LOC_Os01g37280
qShB1-4	Chr1	20823385	20824097	LOC_Os01g37300
qShB1-4	Chr1	20826771	20828912	LOC_Os01g37310
qShB1-4	Chr1	20830267	20834295	LOC_Os01g37320
qShB1-4	Chr1	20838837	20842957	LOC_Os01g37325
qShB1-4	Chr1	20846611	20848218	LOC_Os01g37340
qShB1-4	Chr1	20849734	20857251	LOC_Os01g37350
qShB1-4	Chr1	20857354	20860554	LOC_Os01g37360
qShB1-4	Chr1	20866498	20866869	LOC_Os01g37370
qShB1-4	Chr1	20869964	20872847	LOC_Os01g37380
qShB1-4	Chr1	20876277	20877488	LOC_Os01g37390
qShB1-4	Chr1	20878581	20880562	LOC_Os01g37400
qShB1-4	Chr1	20883137	20886811	LOC_Os01g37410
qShB1-4	Chr1	20893665	20896802	LOC_Os01g37420
qShB1-4	Chr1	20900608	20903021	LOC_Os01g37430
qShB1-4	Chr1	20935789	20937446	LOC_Os01g37460
qShB1-4	Chr1	20938332	20941357	LOC_Os01g37470
qShB1-4	Chr1	20942118	20945758	LOC_Os01g37480
qShB1-4	Chr1	20950401	20951941	LOC_Os01g37490
qShB1-4	Chr1	20952086	20953296	LOC_Os01g37500
qShB1-4	Chr1	20953958	20955515	LOC_Os01g37510
qShB1-4	Chr1	20957411	20958019	LOC_Os01g37520
qShB1-4	Chr1	20960624	20960869	LOC_Os01g37530
qShB1-4	Chr1	20964600	20970755	LOC_Os01g37540
qShB1-4	Chr1	20971387	20974629	LOC_Os01g37550
qShB1-4	Chr1	20987760	20992534	LOC_Os01g37560
qShB1-4	Chr1	21003608	21005963	LOC_Os01g37570
qShB1-4	Chr1	21010563	21022694	LOC_Os01g37580
qShB1-4	Chr1	21038806	21041083	LOC_Os01g37590
qShB1-4	Chr1	21041870	21047241	LOC_Os01g37600
qShB1-4	Chr1	21048778	21053710	LOC_Os01g37610
qShB1-4	Chr1	21056631	21058040	LOC_Os01g37630
qShB1-4	Chr1	21062329	21063718	LOC_Os01g37650
qShB1-4	Chr1	21065461	21065910	LOC_Os01g37660
qShB1-4	Chr1	21068507	21070217	LOC_Os01g37670
qShB1-4	Chr1	21071370	21076730	LOC_Os01g37690
qShB1-4	Chr1	21078007	21079322	LOC_Os01g37700
qShB1-4	Chr1	21082813	21086561	LOC_Os01g37710
qShB1-4	Chr1	21094878	21095765	LOC_Os01g37720
qShB1-4	Chr1	21109257	21110091	LOC_Os01g37740
qShB1-4	Chr1	21114737	21115791	LOC_Os01g37750
qShB1-4	Chr1	21118894	21124772	LOC_Os01g37760
qShB1-4	Chr1	21124856	21128357	LOC_Os01g37770
qShB1-4	Chr1	21134917	21136416	LOC_Os01g37780
qShB1-4	Chr1	21138870	21143094	LOC_Os01g37790
qShB1-4	Chr1	21143775	21146236	LOC_Os01g37800
qShB1-4	Chr1	21150419	21151081	LOC_Os01g37810
qShB1-4	Chr1	21151490	21155639	LOC_Os01g37820
qShB1-4	Chr1	21159072	21167577	LOC_Os01g37825
qShB1-4	Chr1	21167873	21172661	LOC_Os01g37832
qShB1-4	Chr1	21175744	21179966	LOC_Os01g37837
qShB1-4	Chr1	21181431	21184378	LOC_Os01g37842
qShB1-4	Chr1	21184942	21187426	LOC_Os01g37850
qShB1-4	Chr1	21188729	21194388	LOC_Os01g37860
qShB1-4	Chr1	21195398	21202961	LOC_Os01g37870
qShB1-4	Chr1	21207597	21210832	LOC_Os01g37880
qShB1-4	Chr1	21211466	21217621	LOC_Os01g37890
qShB1-4	Chr1	21219554	21222354	LOC_Os01g37900
qShB1-4	Chr1	21230393	21234929	LOC_Os01g37910	Oryza sativa legumain 1	OsaLeg1	Others	Others	1	22887238	22891756	Os01g0559600	-	Others	&quot;wounding response, vegetative-related protease&quot;	10.1016/j.plantsci.2013.11.005.?
qShB1-4	Chr1	21241628	21242888	LOC_Os01g37920
qShB1-4	Chr1	21246909	21250214	LOC_Os01g37930
qShB1-4	Chr1	21250817	21256972	LOC_Os01g37940
qShB1-4	Chr1	21261897	21262392	LOC_Os01g37950
qShB1-4	Chr1	21265644	21270839	LOC_Os01g37960
qShB1-4	Chr1	21273229	21273851	LOC_Os01g37970
qShB1-4	Chr1	21275618	21278815	LOC_Os01g37980
qShB1-4	Chr1	21282643	21284848	LOC_Os01g37990
qShB1-4	Chr1	21286082	21286621	LOC_Os01g38000
qShB1-4	Chr1	21293348	21294697	LOC_Os01g38010
qShB1-4	Chr1	21295776	21296532	LOC_Os01g38020
qShB1-4	Chr1	21306387	21308275	LOC_Os01g38030
qShB1-4	Chr1	21312611	21314742	LOC_Os01g38040
qShB1-4	Chr1	21320242	21321351	LOC_Os01g38058
qShB1-4	Chr1	21328757	21330016	LOC_Os01g38070
qShB1-4	Chr1	21334880	21335080	LOC_Os01g38090
qShB1-4	Chr1	21337973	21340953	LOC_Os01g38100
qShB1-4	Chr1	21342129	21344066	LOC_Os01g38110
qShB1-4	Chr1	21348036	21349674	LOC_Os01g38120
qShB1-4	Chr1	21349838	21350379	LOC_Os01g38130
qShB1-4	Chr1	21354470	21365360	LOC_Os01g38140
qShB1-4	Chr1	21365974	21369381	LOC_Os01g38150
qShB1-4	Chr1	21373213	21375500	LOC_Os01g38160
qShB1-4	Chr1	21376524	21380013	LOC_Os01g38170
qShB1-4	Chr1	21381884	21389644	LOC_Os01g38180
qShB1-4	Chr1	21392229	21393771	LOC_Os01g38190
qShB1-4	Chr1	21399893	21400490	LOC_Os01g38200
qShB1-4	Chr1	21414995	21441447	LOC_Os01g38229
qShB1-4	Chr1	21447486	21450091	LOC_Os01g38244
qShB1-4	Chr1	21464113	21466345	LOC_Os01g38260
qShB1-4	Chr1	21467915	21469537	LOC_Os01g38270
qShB1-4	Chr1	21470518	21472618	LOC_Os01g38280
qShB1-4	Chr1	21475161	21475904	LOC_Os01g38290
qShB1-4	Chr1	21479565	21480781	LOC_Os01g38300
qShB1-4	Chr1	21487877	21488470	LOC_Os01g38310
qShB1-4	Chr1	21494261	21495408	LOC_Os01g38320
qShB1-4	Chr1	21506032	21508644	LOC_Os01g38330
qShB1-4	Chr1	21514855	21520314	LOC_Os01g38340
qShB1-4	Chr1	21525440	21549830	LOC_Os01g38359
qShB1-4	Chr1	21555564	21556757	LOC_Os01g38380
qShB1-4	Chr1	21557256	21557953	LOC_Os01g38390
qShB1-4	Chr1	21570209	21571123	LOC_Os01g38400
qShB1-4	Chr1	21585192	21587145	LOC_Os01g38410
qShB1-4	Chr1	21587288	21590969	LOC_Os01g38420
qShB1-4	Chr1	21603411	21605345	LOC_Os01g38430
qShB1-4	Chr1	21605633	21607851	LOC_Os01g38440
qShB1-4	Chr1	21609722	21611047	LOC_Os01g38450
qShB1-4	Chr1	21615361	21617580	LOC_Os01g38460
qShB1-4	Chr1	21623575	21626767	LOC_Os01g38480
qShB1-4	Chr1	21627154	21627998	LOC_Os01g38490
qShB1-4	Chr1	21628691	21630777	LOC_Os01g38500
qShB1-4	Chr1	21632407	21632649	LOC_Os01g38510
qShB1-4	Chr1	21633972	21635454	LOC_Os01g38520
qShB1-4	Chr1	21637031	21643111	LOC_Os01g38530
qShB1-4	Chr1	21645147	21651299	LOC_Os01g38540
qShB1-4	Chr1	21651915	21655138	LOC_Os01g38550
qShB1-4	Chr1	21661685	21662203	LOC_Os01g38560
qShB1-4	Chr1	21663198	21663859	LOC_Os01g38570
qShB1-4	Chr1	21665618	21669309	LOC_Os01g38580
qShB1-4	Chr1	21671688	21671969	LOC_Os01g38590
qShB1-4	Chr1	21675552	21676168	LOC_Os01g38600
qShB1-4	Chr1	21687401	21689929	LOC_Os01g38610
qShB1-4	Chr1	21698949	21704210	LOC_Os01g38620
qShB1-4	Chr1	21710697	21711107	LOC_Os01g38640
qShB1-4	Chr1	21713726	21714960	LOC_Os01g38650
qShB1-4	Chr1	21715723	21716605	LOC_Os01g38660
qShB1-4	Chr1	21719861	21722141	LOC_Os01g38670
qShB1-4	Chr1	21724008	21725863	LOC_Os01g38680
qShB1-4	Chr1	21730389	21733951	LOC_Os01g38690
qShB1-4	Chr1	21736068	21737326	LOC_Os01g38700
qShB1-4	Chr1	21737641	21738474	LOC_Os01g38710
qShB1-4	Chr1	21742309	21744055	LOC_Os01g38720
qShB1-4	Chr1	21746339	21748010	LOC_Os01g38730
qShB1-4	Chr1	21750063	21754448	LOC_Os01g38740
qShB1-4	Chr1	21755190	21755910	LOC_Os01g38750
qShB1-4	Chr1	21756985	21757704	LOC_Os01g38760
qShB1-4	Chr1	21759934	21761424	LOC_Os01g38780
qShB1-4	Chr1	21762161	21763597	LOC_Os01g38790
qShB1-4	Chr1	21765762	21766216	LOC_Os01g38800
qShB1-4	Chr1	21769470	21771706	LOC_Os01g38810
qShB1-4	Chr1	21774553	21777049	LOC_Os01g38820
qShB1-4	Chr1	21779222	21780991	LOC_Os01g38830
qShB1-4	Chr1	21788887	21790926	LOC_Os01g38840
qShB1-4	Chr1	21795493	21797134	LOC_Os01g38850
qShB1-4	Chr1	21804812	21805778	LOC_Os01g38860
qShB1-4	Chr1	21808476	21810503	LOC_Os01g38870
qShB1-4	Chr1	21814796	21817281	LOC_Os01g38880
qShB1-4	Chr1	21821581	21826231	LOC_Os01g38890
qShB1-4	Chr1	21837626	21846100	LOC_Os01g38900
qShB1-4	Chr1	21847494	21848084	LOC_Os01g38910
qShB1-4	Chr1	21851610	21852484	LOC_Os01g38920
qShB1-4	Chr1	21869948	21871467	LOC_Os01g38930
qShB1-4	Chr1	21876125	21876591	LOC_Os01g38940
qShB1-4	Chr1	21878988	21884037	LOC_Os01g38950
qShB1-4	Chr1	21886899	21887840	LOC_Os01g38960
qShB1-4	Chr1	21892788	21897947	LOC_Os01g38970
qShB1-4	Chr1	21900045	21903309	LOC_Os01g38980
qShB1-4	Chr1	21917966	21921710	LOC_Os01g38990
qShB1-4	Chr1	21922009	21927946	LOC_Os01g39000
qShB1-4	Chr1	21933264	21936072	LOC_Os01g39010
qShB1-4	Chr1	21938865	21941839	LOC_Os01g39020	heat shock transcription factor7	OsHsfA7	Resistance or Tolerance	Salinity tolerance	1	23595710	23598642	Os01g0571300	-	Overexpression	Drought and salinity tolerance.	10.5483/BMBRep.2013.46.1.090
qShB1-4	Chr1	21942244	21942708	LOC_Os01g39030
qShB1-4	Chr1	21944097	21945426	LOC_Os01g39040
qShB1-4	Chr1	21949940	21956491	LOC_Os01g39050
qShB1-4	Chr1	21955893	21963353	LOC_Os01g39060
qShB1-4	Chr1	21965383	21966047	LOC_Os01g39070
qShB1-4	Chr1	21967984	21968571	LOC_Os01g39080
qShB1-4	Chr1	21971220	21971465	LOC_Os01g39090
qShB1-4	Chr1	21973687	21980482	LOC_Os01g39100
qShB1-4	Chr1	21992872	21997045	LOC_Os01g39110
qShB1-4	Chr1	22004910	22005367	LOC_Os01g39120
qShB1-4	Chr1	22021847	22027269	LOC_Os01g39134
qShB1-4	Chr1	22031208	22034011	LOC_Os01g39136
qShB1-4	Chr1	22036830	22037585	LOC_Os01g39150
qShB1-4	Chr1	22039590	22040105	LOC_Os01g39160
qShB1-4	Chr1	22040631	22041226	LOC_Os01g39170
qShB1-4	Chr1	22042930	22045314	LOC_Os01g39180
qShB1-4	Chr1	22046105	22051738	LOC_Os01g39190
qShB1-4	Chr1	22053629	22058501	LOC_Os01g39200
qShB1-4	Chr1	22061082	22061411	LOC_Os01g39210
qShB1-4	Chr1	22064321	22064740	LOC_Os01g39220
qShB1-4	Chr1	22067798	22068241	LOC_Os01g39230
qShB1-4	Chr1	22074383	22079861	LOC_Os01g39250
qShB1-4	Chr1	22082256	22088383	LOC_Os01g39260
qShB1-4	Chr1	22088204	22091020	LOC_Os01g39270
qShB1-4	Chr1	22091548	22091889	LOC_Os01g39280
qShB1-4	Chr1	22098320	22099659	LOC_Os01g39290
qShB1-4	Chr1	22120317	22128727	LOC_Os01g39310
qShB1-4	Chr1	22135138	22135946	LOC_Os01g39320
qShB1-4	Chr1	22138043	22142486	LOC_Os01g39330
qShB1-4	Chr1	22144756	22145079	LOC_Os01g39340
qShB1-4	Chr1	22146536	22148748	LOC_Os01g39350
qShB1-4	Chr1	22152214	22154360	LOC_Os01g39360
qShB1-4	Chr1	22154794	22160793	LOC_Os01g39370
qShB1-4	Chr1	22163096	22180429	LOC_Os01g39380
qShB1-4	Chr1	22189635	22195896	LOC_Os01g39385
qShB1-4	Chr1	22207087	22208133	LOC_Os01g39399
qShB1-4	Chr1	22210819	22214673	LOC_Os01g39420
qShB1-4	Chr1	22217649	22219230	LOC_Os01g39430
qShB1-4	Chr1	22223529	22224308	LOC_Os01g39440
qShB1-4	Chr1	22224574	22226862	LOC_Os01g39450
qShB1-4	Chr1	22228255	22233258	LOC_Os01g39464
qShB1-4	Chr1	22236914	22238067	LOC_Os01g39480
qShB1-4	Chr1	22255173	22257759	LOC_Os01g39490
qShB1-4	Chr1	22264127	22264351	LOC_Os01g39500
qShB1-4	Chr1	22270048	22270547	LOC_Os01g39510
qShB1-4	Chr1	22271847	22273477	LOC_Os01g39520
qShB1-4	Chr1	22273628	22275696	LOC_Os01g39530
qShB1-4	Chr1	22277877	22279311	LOC_Os01g39540
qShB1-4	Chr1	22295733	22299955	LOC_Os01g39550
qShB1-4	Chr1	22301236	22307857	LOC_Os01g39560
qShB1-4	Chr1	22316257	22321711	LOC_Os01g39570
qShB1-4	Chr1	22322069	22327371	LOC_Os01g39580
qShB1-4	Chr1	22332527	22333242	LOC_Os01g39590
qShB1-4	Chr1	22337346	22341545	LOC_Os01g39600
qShB1-4	Chr1	22353190	22358405	LOC_Os01g39630	RAD51C	RAD51C	Resistance or Tolerance	Other stress resistance	1	24010037	24015250	Os01g0578000	-	Mutant	Male and female sterility. UV tolerance.	10.1093/jxb/ers190
qShB1-4	Chr1	22360896	22362306	LOC_Os01g39640
qShB1-4	Chr1	22365507	22369394	LOC_Os01g39650
qShB1-4	Chr1	22371526	22373706	LOC_Os01g39660
qShB1-4	Chr1	22375575	22377560	LOC_Os01g39670	SaF	SaF	Physiological trait	Sterility	1	24032420	24034152	Os01g0578500	-	Natural variation	Hybrid male sterility. Pollen development. Interaction with SaM	10.1073/pnas.0810108105
qShB1-4	Chr1	22379059	22383049	LOC_Os01g39680	SaM	SaM	Physiological trait	Sterility	1	24035904	24039721	Os01g0578700	-	Natural variation	Hybrid male sterility. Pollen development. Interaction with SaF	10.1073/pnas.0810108105
qShB1-4	Chr1	22385192	22386611	LOC_Os01g39690
qShB1-4	Chr1	22391402	22392742	LOC_Os01g39700
qShB1-4	Chr1	22395594	22398038	LOC_Os01g39710
qShB1-4	Chr1	22401409	22404654	LOC_Os01g39720
qShB1-4	Chr1	22404937	22407221	LOC_Os01g39730
qShB1-4	Chr1	22408357	22411409	LOC_Os01g39740
qShB1-4	Chr1	22412478	22413206	LOC_Os01g39750
qShB1-4	Chr1	22417587	22418036	LOC_Os01g39760
qShB1-4	Chr1	22427831	22430870	LOC_Os01g39770
qShB1-4	Chr1	22436013	22438392	LOC_Os01g39780
qShB1-4	Chr1	22439033	22442003	LOC_Os01g39790
qShB1-4	Chr1	22446210	22449819	LOC_Os01g39800
qShB1-4	Chr1	22450498	22456233	LOC_Os01g39810
qShB1-4	Chr1	22455140	22456347	LOC_Os01g39820
qShB1-4	Chr1	22466546	22472589	LOC_Os01g39830
qShB1-4	Chr1	22471886	22474413	LOC_Os01g39840
qShB1-4	Chr1	22474568	22476504	LOC_Os01g39850
qShB1-4	Chr1	22489496	22491483	LOC_Os01g39860	ACC oxidase 7	OsACO7	Resistance or Tolerance	Blast resistance	1	24146341	24147812	Os01g0580500	-	Knockdown	Ethylene and Cyanide production. Resistance to blast fungus via restriction of fungal growth.	10.1104/pp.110.162412
qShB1-4	Chr1	22491916	22492317	LOC_Os01g39870
qShB1-4	Chr1	22494356	22500816	LOC_Os01g39890
qShB1-4	Chr1	22505295	22505558	LOC_Os01g39910
qShB1-4	Chr1	22512220	22513020	LOC_Os01g39920
qShB1-4	Chr1	22513286	22517653	LOC_Os01g39930
qShB1-4	Chr1	22527011	22529304	LOC_Os01g39940
qShB1-4	Chr1	22533915	22534451	LOC_Os01g39950
qShB1-4	Chr1	22534999	22538743	LOC_Os01g39960
qShB1-4	Chr1	22538988	22542228	LOC_Os01g39970
qShB1-4	Chr1	22543693	22545461	LOC_Os01g39980
qShB1-4	Chr1	22552874	22554531	LOC_Os01g39990
qShB1-4	Chr1	22557450	22561727	LOC_Os01g40000
qShB1-4	Chr1	22566747	22574056	LOC_Os01g40010
qShB1-4	Chr1	22575461	22576837	LOC_Os01g40020
qShB1-4	Chr1	22579476	22581814	LOC_Os01g40030
qShB1-4	Chr1	22587503	22589976	LOC_Os01g40040
qShB1-4	Chr1	22591350	22596165	LOC_Os01g40050
qShB1-4	Chr1	22604519	22606808	LOC_Os01g40070
qShB1-4	Chr1	22614141	22614771	LOC_Os01g40080
qShB1-4	Chr1	22617780	22624147	LOC_Os01g40094
qShB1-4	Chr1	22625206	22628058	LOC_Os01g40110
qShB1-4	Chr1	22632889	22637560	LOC_Os01g40120
qShB1-4	Chr1	22639243	22640243	LOC_Os01g40130
qShB1-4	Chr1	22641281	22642512	LOC_Os01g40140
qShB1-4	Chr1	22645023	22650145	LOC_Os01g40150
qShB1-4	Chr1	22651086	22653720	LOC_Os01g40160
qShB1-4	Chr1	22656369	22664571	LOC_Os01g40170
qShB1-4	Chr1	22666117	22667013	LOC_Os01g40180
qShB1-4	Chr1	22675935	22678621	LOC_Os01g40190
qShB1-4	Chr1	22683543	22688044	LOC_Os01g40200
qShB1-4	Chr1	22693066	22693713	LOC_Os01g40210
qShB1-4	Chr1	22695281	22695666	LOC_Os01g40220
qShB1-4	Chr1	22698421	22705057	LOC_Os01g40230
qShB1-4	Chr1	22705884	22707470	LOC_Os01g40240
qShB1-4	Chr1	22709587	22728525	LOC_Os01g40250
qShB1-4	Chr1	22731943	22733240	LOC_Os01g40260
qShB1-4	Chr1	22742519	22747184	LOC_Os01g40280
qShB1-4	Chr1	22747336	22748143	LOC_Os01g40290
qShB1-4	Chr1	22754488	22755471	LOC_Os01g40310
qShB1-4	Chr1	22756079	22758879	LOC_Os01g40320
qShB1-4	Chr1	22767811	22772679	LOC_Os01g40330
qShB1-4	Chr1	22776946	22782787	LOC_Os01g40340
qShB1-4	Chr1	22782914	22783516	LOC_Os01g40350
qShB1-4	Chr1	22785626	22787966	LOC_Os01g40360
qShB1-4	Chr1	22791112	22793723	LOC_Os01g40370
qShB1-4	Chr1	22797625	22798966	LOC_Os01g40380
qShB1-4	Chr1	22803686	22808204	LOC_Os01g40390
qShB1-4	Chr1	22808698	22810686	LOC_Os01g40400
qShB1-4	Chr1	22815073	22817909	LOC_Os01g40410
qShB1-4	Chr1	22820220	22823182	LOC_Os01g40420
qShB1-4	Chr1	22824809	22827116	LOC_Os01g40430
qShB1-4	Chr1	22835778	22840127	LOC_Os01g40450
qShB1-4	Chr1	22846826	22849631	LOC_Os01g40460
qShB1-4	Chr1	22855458	22859753	LOC_Os01g40470
qShB1-4	Chr1	22868546	22872149	LOC_Os01g40480
qShB1-4	Chr1	22879904	22895941	LOC_Os01g40499
qShB1-4	Chr1	22896081	22896821	LOC_Os01g40520
qShB1-4	Chr1	22897481	22898843	LOC_Os01g40530
qShB1-4	Chr1	22899829	22900317	LOC_Os01g40540
qShB1-4	Chr1	22900967	22902320	LOC_Os01g40550
qShB1-4	Chr1	22906443	22907811	LOC_Os01g40560
qShB1-4	Chr1	22908180	22910687	LOC_Os01g40570
qShB1-4	Chr1	22914582	22916173	LOC_Os01g40580
qShB1-4	Chr1	22918453	22923870	LOC_Os01g40590
qShB1-4	Chr1	22929243	22930118	LOC_Os01g40600
qShB1-4	Chr1	22931927	22937272	LOC_Os01g40610
qShB1-4	Chr1	22948164	22952187	LOC_Os01g40620
qShB1-4	Chr1	22954908	22959225	LOC_Os01g40630	LONELY GUY	log	Morphological trait	Panicle flower	1	24611916	24615994	Os01g0588900	-	Mutant	Panicle size and branching patterns. Number of floral organs. Maintenance of shoot meristems. Cytokinin activation.	10.1038/nature05504
qShB1-4	Chr1	22979942	22983176	LOC_Os01g40640
qShB1-4	Chr1	22983392	22985788	LOC_Os01g40650
qShB1-4	Chr1	22986748	22987781	LOC_Os01g40660
qShB1-4	Chr1	22988229	22992468	LOC_Os01g40670
qShB1-4	Chr1	22992552	22994171	LOC_Os01g40680
qShB1-4	Chr1	22996030	22998507	LOC_Os01g40690
qShB1-4	Chr1	22999991	23002458	LOC_Os01g40700
qShB1-4	Chr1	23003671	23005010	LOC_Os01g40710
qShB1-4	Chr1	23005753	23008941	LOC_Os01g40720
qShB1-4	Chr1	23013424	23013939	LOC_Os01g40730
qShB1-4	Chr1	23015507	23017118	LOC_Os01g40740
qShB1-4	Chr1	23023042	23026116	LOC_Os01g40750
qShB1-4	Chr1	23030252	23031000	LOC_Os01g40760
qShB1-4	Chr1	23033048	23035078	LOC_Os01g40770
qShB1-4	Chr1	23035865	23037230	LOC_Os01g40780
qShB1-4	Chr1	23049134	23050037	LOC_Os01g40790
qShB1-4	Chr1	23052429	23055512	LOC_Os01g40800
qShB1-4	Chr1	23056187	23062338	LOC_Os01g40810
qShB1-4	Chr1	23073579	23079781	LOC_Os01g40820
qShB1-4	Chr1	23082349	23089374	LOC_Os01g40830
qShB1-4	Chr1	23090754	23095383	LOC_Os01g40840
qShB1-4	Chr1	23097256	23106303	LOC_Os01g40860
qShB1-4	Chr1	23113645	23119715	LOC_Os01g40870
qShB1-4	Chr1	23123786	23123998	LOC_Os01g40880
qShB1-4	Chr1	23125531	23127535	LOC_Os01g40890
qShB1-4	Chr1	23132464	23135237	LOC_Os01g40900
qShB1-4	Chr1	23137484	23142649	LOC_Os01g40910
qShB1-4	Chr1	23145188	23147620	LOC_Os01g40920
qShB1-4	Chr1	23153160	23156321	LOC_Os01g40930
qShB1-4	Chr1	23162339	23163494	LOC_Os01g40940
qShB1-4	Chr1	23167606	23168325	LOC_Os01g40950
qShB1-4	Chr1	23171263	23171886	LOC_Os01g40960
qShB1-4	Chr1	23173640	23174380	LOC_Os01g40970
qShB1-4	Chr1	23174817	23186976	LOC_Os01g40980
qShB1-4	Chr1	23189362	23213721	LOC_Os01g40990
qShB1-4	Chr1	23214622	23215297	LOC_Os01g41000
qShB1-4	Chr1	23224233	23226650	LOC_Os01g41010
qShB1-4	Chr1	23227872	23232376	LOC_Os01g41020
qShB1-4	Chr1	23234635	23237672	LOC_Os01g41030
qShB1-4	Chr1	23240045	23241815	LOC_Os01g41040
qShB1-4	Chr1	23247278	23250623	LOC_Os01g41050
qShB1-4	Chr1	23253981	23257156	LOC_Os01g41060
qShB1-4	Chr1	23257782	23263959	LOC_Os01g41070
qShB1-4	Chr1	23264627	23267699	LOC_Os01g41080
qShB1-4	Chr1	23268296	23273414	LOC_Os01g41090
qShB1-4	Chr1	23275351	23278282	LOC_Os01g41100
qShB1-4	Chr1	23280032	23280870	LOC_Os01g41110
qShB1-4	Chr1	23285238	23287337	LOC_Os01g41120
qShB1-4	Chr1	23291659	23292667	LOC_Os01g41140
qShB1-4	Chr1	23295511	23298010	LOC_Os01g41145
qShB1-4	Chr1	23300866	23302958	LOC_Os01g41160
qShB1-4	Chr1	23311171	23312581	LOC_Os01g41170
qShB1-4	Chr1	23313211	23313928	LOC_Os01g41180
qShB1-4	Chr1	23316216	23322915	LOC_Os01g41190
qShB1-4	Chr1	23324465	23325296	LOC_Os01g41200
qShB1-4	Chr1	23328798	23331792	LOC_Os01g41210
qShB1-4	Chr1	23333006	23337594	LOC_Os01g41220
qShB1-4	Chr1	23338856	23339283	LOC_Os01g41230
qShB1-4	Chr1	23343306	23345461	LOC_Os01g41240
qShB1-4	Chr1	23347750	23349394	LOC_Os01g41250
qShB1-4	Chr1	23351846	23353935	LOC_Os01g41260
qShB1-4	Chr1	23356994	23360195	LOC_Os01g41270
qShB1-4	Chr1	23360626	23362332	LOC_Os01g41280
qShB1-4	Chr1	23363772	23365998	LOC_Os01g41290
qShB1-4	Chr1	23367464	23368423	LOC_Os01g41300
qShB1-4	Chr1	23376598	23378594	LOC_Os01g41310
qShB1-4	Chr1	23384201	23384691	LOC_Os01g41320
qShB1-4	Chr1	23387876	23388428	LOC_Os01g41330
qShB1-4	Chr1	23392955	23394611	LOC_Os01g41340
qShB1-4	Chr1	23397521	23400741	LOC_Os01g41350
qShB1-4	Chr1	23402326	23404122	LOC_Os01g41360
qShB1-4	Chr1	23408623	23411173	LOC_Os01g41370
qShB1-4	Chr1	23424049	23424369	LOC_Os01g41390
qShB1-4	Chr1	23439509	23441397	LOC_Os01g41400
qShB1-4	Chr1	23442161	23442475	LOC_Os01g41410
qShB1-4	Chr1	23447260	23450935	LOC_Os01g41420
qShB1-4	Chr1	23456074	23458037	LOC_Os01g41430
qShB1-4	Chr1	23461186	23462628	LOC_Os01g41440
qShB1-4	Chr1	23463736	23465185	LOC_Os01g41450
qShB1-4	Chr1	23472219	23474470	LOC_Os01g41460
qShB1-4	Chr1	23478978	23480223	LOC_Os01g41470
qShB1-4	Chr1	23482415	23485058	LOC_Os01g41480
qShB1-4	Chr1	23485289	23486885	LOC_Os01g41490
qShB1-4	Chr1	23487723	23490625	LOC_Os01g41500
qShB1-4	Chr1	23498443	23502377	LOC_Os01g41510
qShB1-4	Chr1	23503852	23505645	LOC_Os01g41516
qShB1-4	Chr1	23506649	23507760	LOC_Os01g41522
qShB1-4	Chr1	23510098	23512343	LOC_Os01g41530
qShB1-4	Chr1	23513361	23513934	LOC_Os01g41540
qShB1-4	Chr1	23515004	23516896	LOC_Os01g41550
qShB1-4	Chr1	23522430	23523556	LOC_Os01g41560
qShB1-4	Chr1	23530089	23532731	LOC_Os01g41565
qShB1-4	Chr1	23545552	23546937	LOC_Os01g41580
qShB1-4	Chr1	23547244	23549094	LOC_Os01g41590
qShB1-4	Chr1	23551970	23554252	LOC_Os01g41600
qShB1-4	Chr1	23553683	23557654	LOC_Os01g41610
qShB1-4	Chr1	23561705	23567329	LOC_Os01g41620
qShB1-4	Chr1	23569779	23576544	LOC_Os01g41630
qShB1-4	Chr1	23577237	23580555	LOC_Os01g41640
qShB1-4	Chr1	23581143	23584760	LOC_Os01g41650
qShB1-4	Chr1	23583981	23586159	LOC_Os01g41660
qShB1-4	Chr1	23587133	23588878	LOC_Os01g41670
qShB1-4	Chr1	23591432	23592806	LOC_Os01g41680
qShB1-4	Chr1	23595050	23601218	LOC_Os01g41690
qShB1-4	Chr1	23601853	23605086	LOC_Os01g41700
qShB1-4	Chr1	23607348	23608583	LOC_Os01g41710
qShB1-4	Chr1	23611059	23615257	LOC_Os01g41720
qShB1-4	Chr1	23624289	23627032	LOC_Os01g41730
qShB1-4	Chr1	23630444	23631237	LOC_Os01g41740
qShB1-4	Chr1	23631765	23635375	LOC_Os01g41750
qShB1-4	Chr1	23637242	23637568	LOC_Os01g41760
qShB1-4	Chr1	23639654	23642880	LOC_Os01g41770
qShB1-4	Chr1	23648265	23651499	LOC_Os01g41780
qShB1-4	Chr1	23656010	23658316	LOC_Os01g41790
qShB1-4	Chr1	23663059	23664444	LOC_Os01g41800
qShB1-4	Chr1	23673292	23675869	LOC_Os01g41810
qShB1-4	Chr1	23682382	23685393	LOC_Os01g41820
qShB1-4	Chr1	23688289	23692031	LOC_Os01g41834
qShB1-4	Chr1	23702080	23704044	LOC_Os01g41850
qShB1-4	Chr1	23712305	23713236	LOC_Os01g41860
qShB1-4	Chr1	23727761	23733080	LOC_Os01g41870
qShB1-4	Chr1	23740813	23744995	LOC_Os01g41880
qShB1-4	Chr1	23746840	23751713	LOC_Os01g41890
qShB1-4	Chr1	23760347	23762500	LOC_Os01g41900
qShB1-4	Chr1	23770115	23771515	LOC_Os01g41910
qShB1-4	Chr1	23772315	23772683	LOC_Os01g41920
qShB1-4	Chr1	23775861	23779747	LOC_Os01g41930
qShB1-4	Chr1	23782487	23785775	LOC_Os01g41950
qShB1-4	Chr1	23787960	23796972	LOC_Os01g41960
qShB1-4	Chr1	23801274	23801986	LOC_Os01g41970
qShB1-4	Chr1	23806124	23808853	LOC_Os01g41980
qShB1-4	Chr1	23810148	23811557	LOC_Os01g41990
qShB1-4	Chr1	23812709	23814712	LOC_Os01g42000
qShB1-4	Chr1	23814822	23819289	LOC_Os01g42010
qShB1-4	Chr1	23823086	23828384	LOC_Os01g42020
qShB1-4	Chr1	23829862	23830602	LOC_Os01g42024
qShB1-4	Chr1	23838868	23840959	LOC_Os01g42030
qShB1-4	Chr1	23840853	23843547	LOC_Os01g42050
qShB1-4	Chr1	23843274	23846881	LOC_Os01g42040
qShB1-4	Chr1	23847041	23850326	LOC_Os01g42060
qShB1-4	Chr1	23850865	23854484	LOC_Os01g42070
qShB1-4	Chr1	23855728	23861840	LOC_Os01g42080
qShB1-4	Chr1	23864681	23867313	LOC_Os01g42090
qShB1-4	Chr1	23875313	23876214	LOC_Os01g42100
qShB1-4	Chr1	23877624	23880246	LOC_Os01g42110
qShB1-4	Chr1	23881900	23884206	LOC_Os01g42120
qShB1-4	Chr1	23885298	23885725	LOC_Os01g42130
qShB1-4	Chr1	23886843	23888222	LOC_Os01g42140
qShB1-4	Chr1	23890125	23890711	LOC_Os01g42150
qShB1-4	Chr1	23896936	23897459	LOC_Os01g42160
qShB1-4	Chr1	23903468	23908372	LOC_Os01g42170
qShB1-4	Chr1	23911517	23913299	LOC_Os01g42190
qShB1-4	Chr1	23914148	23914895	LOC_Os01g42200
qShB1-4	Chr1	23919358	23921129	LOC_Os01g42210
qShB1-4	Chr1	23922344	23922862	LOC_Os01g42220
qShB1-4	Chr1	23923718	23933451	LOC_Os01g42234
qShB1-4	Chr1	23938369	23949895	LOC_Os01g42260
qShB1-4	Chr1	23952800	23963455	LOC_Os01g42270
qShB1-4	Chr1	23969757	23972311	LOC_Os01g42280
qShB1-4	Chr1	23975949	23982081	LOC_Os01g42294
qShB1-4	Chr1	24001541	24002970	LOC_Os01g42310
qShB1-4	Chr1	24015673	24019941	LOC_Os01g42320
qShB1-4	Chr1	24022059	24027535	LOC_Os01g42330
qShB1-4	Chr1	24038087	24040195	LOC_Os01g42340
qShB1-4	Chr1	24047544	24055918	LOC_Os01g42350
qShB1-4	Chr1	24061262	24061558	LOC_Os01g42360
qShB1-4	Chr1	24065207	24073621	LOC_Os01g42370
qShB1-4	Chr1	24075065	24082181	LOC_Os01g42380
qShB1-4	Chr1	24103349	24105829	LOC_Os01g42400
qShB1-4	Chr1	24107080	24115143	LOC_Os01g42410
qShB1-4	Chr1	24123244	24123990	LOC_Os01g42420
qShB1-4	Chr1	24126549	24129627	LOC_Os01g42430
qShB1-4	Chr1	24130519	24130791	LOC_Os01g42440
qShB1-4	Chr1	24136871	24144338	LOC_Os01g42460
qShB1-4	Chr1	24145843	24149003	LOC_Os01g42470
qShB1-4	Chr1	24150983	24154101	LOC_Os01g42480
qShB1-4	Chr1	24155647	24162572	LOC_Os01g42490
qShB1-4	Chr1	24163351	24166211	LOC_Os01g42500
qShB1-4	Chr1	24168245	24171441	LOC_Os01g42510
qShB1-4	Chr1	24181111	24184171	LOC_Os01g42520
qShB1-4	Chr1	24191709	24193093	LOC_Os01g42540
qShB1-4	Chr1	24195819	24196265	LOC_Os01g42550
qShB1-4	Chr1	24199239	24200411	LOC_Os01g42560
qShB1-4	Chr1	24203656	24204403	LOC_Os01g42570
qShB1-4	Chr1	24205926	24206672	LOC_Os01g42580
qShB1-4	Chr1	24209573	24214707	LOC_Os01g42590
qShB1-4	Chr1	24229902	24230153	LOC_Os01g42600
qShB1-4	Chr1	24234629	24238989	LOC_Os01g42610
qShB1-4	Chr1	24239930	24245230	LOC_Os01g42620
qShB1-4	Chr1	24245731	24249379	LOC_Os01g42630
qShB1-4	Chr1	24249884	24250737	LOC_Os01g42640
qShB1-4	Chr1	24255299	24259958	LOC_Os01g42650
qShB1-4	Chr1	24264516	24266499	LOC_Os01g42660
qShB1-4	Chr1	24269791	24272402	LOC_Os01g42670
qShB1-4	Chr1	24277095	24281049	LOC_Os01g42690
qShB1-4	Chr1	24282735	24285310	LOC_Os01g42700
qShB1-4	Chr1	24292537	24299697	LOC_Os01g42710	LSD1 ortholog 2	OsLOL2	Morphological trait	Dwarf	1	25951136	25956346	Os01g0612700	-	Knockdown Overexpression	Bacterial blight resistance. Dwafism restored by exogenous GA3 treatment.	10.1007/s00438-007-0232-2
qShB1-4	Chr1	24300144	24301233	LOC_Os01g42720
qShB1-4	Chr1	24312601	24317553	LOC_Os01g42730
qShB1-4	Chr1	24325337	24325666	LOC_Os01g42740
qShB1-4	Chr1	24334380	24336158	LOC_Os01g42760
qShB1-4	Chr1	24341214	24343585	LOC_Os01g42770
qShB1-4	Chr1	24343518	24345173	LOC_Os01g42780
qShB1-4	Chr1	24351302	24353345	LOC_Os01g42790
qShB1-4	Chr1	24354151	24360484	LOC_Os01g42800
qShB1-4	Chr1	24364146	24367721	LOC_Os01g42810
qShB1-4	Chr1	24368724	24372204	LOC_Os01g42820
qShB1-4	Chr1	24375877	24379929	LOC_Os01g42830
qShB1-4	Chr1	24380082	24380597	LOC_Os01g42840
qShB1-4	Chr1	24380636	24386687	LOC_Os01g42850	autophagy associated gene 7	OsATG7	Physiological trait	Sterility	1	26043346	26037483	Os01g0614900	-	Knockdown	&quot;pollen maturation, degradation of ingracellular components in the tapetum, lipid metabolism of pollen grains through Lands cycle-mediated phosphatidylcholine&quot;	10.4161/auto.28279
qShB1-4	Chr1	24392841	24393423	LOC_Os01g42860
qShB1-4	Chr1	24395057	24396820	LOC_Os01g42870
qShB1-4	Chr1	24397508	24400705	LOC_Os01g42880
qShB1-4	Chr1	24401606	24402040	LOC_Os01g42890
qShB4	Chr4	20698942	20699295	LOC_Os04g34150
qShB4	Chr4	20702493	20703849	LOC_Os04g34160
qShB4	Chr4	20708033	20709831	LOC_Os04g34170
qShB4	Chr4	20713198	20717279	LOC_Os04g34180
qShB4	Chr4	20718340	20722706	LOC_Os04g34190
qShB4	Chr4	20724238	20725149	LOC_Os04g34200
qShB4	Chr4	20728817	20730052	LOC_Os04g34220
qShB4	Chr4	20733300	20735940	LOC_Os04g34230
qShB4	Chr4	20738833	20740465	LOC_Os04g34240
qShB4	Chr4	20742122	20744730	LOC_Os04g34250
qShB4	Chr4	20749722	20754272	LOC_Os04g34260
qShB4	Chr4	20757754	20760636	LOC_Os04g34270
qShB4	Chr4	20764906	20765388	LOC_Os04g34280
qShB4	Chr4	20768967	20771417	LOC_Os04g34290
qShB4	Chr4	20779211	20781637	LOC_Os04g34300
qShB4	Chr4	20785327	20787653	LOC_Os04g34320
qShB4	Chr4	20790085	20792481	LOC_Os04g34330
qShB4	Chr4	20797735	20799070	LOC_Os04g34340
qShB4	Chr4	20803020	20807592	LOC_Os04g34350
qShB4	Chr4	20811118	20813251	LOC_Os04g34360
qShB4	Chr4	20817908	20820655	LOC_Os04g34370
qShB4	Chr4	20822083	20823593	LOC_Os04g34380
qShB4	Chr4	20825303	20827711	LOC_Os04g34390
qShB4	Chr4	20828455	20830475	LOC_Os04g34400
qShB4	Chr4	20834585	20838104	LOC_Os04g34410
qShB4	Chr4	20843256	20845682	LOC_Os04g34420
qShB4	Chr4	20852156	20858471	LOC_Os04g34440
qShB4	Chr4	20862474	20872470	LOC_Os04g34450
qShB4	Chr4	20873336	20876370	LOC_Os04g34460
qShB4	Chr4	20877236	20877694	LOC_Os04g34470
qShB4	Chr4	20880786	20881383	LOC_Os04g34480
qShB4	Chr4	20882277	20885620	LOC_Os04g34490
qShB4	Chr4	20887295	20890646	LOC_Os04g34500
qShB4	Chr4	20892244	20892859	LOC_Os04g34510
qShB4	Chr4	20893340	20894304	LOC_Os04g34520
qShB4	Chr4	20897565	20902883	LOC_Os04g34530
qShB4	Chr4	20904122	20905476	LOC_Os04g34540
qShB4	Chr4	20909813	20912865	LOC_Os04g34550
qShB4	Chr4	20913113	20914394	LOC_Os04g34560
qShB4	Chr4	20914900	20920417	LOC_Os04g34570
qShB4	Chr4	20924201	20925292	LOC_Os04g34580
qShB4	Chr4	20925887	20928899	LOC_Os04g34590
qShB4	Chr4	20934819	20936052	LOC_Os04g34600
qShB4	Chr4	20941351	20948329	LOC_Os04g34610
qShB4	Chr4	20949614	20952806	LOC_Os04g34620
qShB4	Chr4	20954476	20955830	LOC_Os04g34630
qShB4	Chr4	20957185	20958350	LOC_Os04g34640
qShB4	Chr4	20960207	20964668	LOC_Os04g34650
qShB4	Chr4	20967161	20973125	LOC_Os04g34670
qShB4	Chr4	20976363	20978308	LOC_Os04g34680
qShB4	Chr4	20991345	20995022	LOC_Os04g34699
qShB4	Chr4	21001722	21010737	LOC_Os04g34720
qShB4	Chr4	21015755	21016697	LOC_Os04g34710
qShB4	Chr4	21020556	21022753	LOC_Os04g34700
qShB4	Chr4	21035824	21036261	LOC_Os04g34690
qShB4	Chr4	21041421	21043117	LOC_Os04g34740
qShB4	Chr4	21052764	21053748	LOC_Os04g34750
qShB4	Chr4	21057910	21058629	LOC_Os04g34760
qShB4	Chr4	21077106	21078066	LOC_Os04g34780
qShB4	Chr4	21100460	21101558	LOC_Os04g34800
qShB4	Chr4	21102107	21103431	LOC_Os04g34810
qShB4	Chr4	21107263	21108775	LOC_Os04g34820
qShB4	Chr4	21115829	21116594	LOC_Os04g34830
qShB4	Chr4	21123537	21126869	LOC_Os04g34840
qShB4	Chr4	21123537	21126842	LOC_Os04g36550
qShB4	Chr4	21132230	21136722	LOC_Os04g34850
qShB4	Chr4	21146827	21147255	LOC_Os04g34860
qShB4	Chr4	21176064	21176773	LOC_Os04g34870
qShB4	Chr4	21178256	21179416	LOC_Os04g34880
qShB4	Chr4	21184450	21186096	LOC_Os04g34890
qShB4	Chr4	21207026	21208285	LOC_Os04g34900
qShB4	Chr4	21214944	21215985	LOC_Os04g34910
qShB4	Chr4	21227202	21230754	LOC_Os04g34930
qShB4	Chr4	21232538	21235466	LOC_Os04g34940
qShB4	Chr4	21238974	21241943	LOC_Os04g34950
qShB4	Chr4	21243069	21247450	LOC_Os04g34960
qShB4	Chr4	21248865	21249599	LOC_Os04g34970
qShB4	Chr4	21258335	21262830	LOC_Os04g34976
qShB4	Chr4	21263959	21268754	LOC_Os04g34984
qShB4	Chr4	21271523	21274076	LOC_Os04g35000
qShB4	Chr4	21276704	21281674	LOC_Os04g35010
qShB4	Chr4	21281712	21285260	LOC_Os04g35020
qShB4	Chr4	21288130	21293643	LOC_Os04g35030
qShB4	Chr4	21299404	21300533	LOC_Os04g35050
qShB4	Chr4	21310430	21318247	LOC_Os04g35060
qShB4	Chr4	21319617	21320638	LOC_Os04g35070
qShB4	Chr4	21323046	21326956	LOC_Os04g35080
qShB4	Chr4	21329716	21331931	LOC_Os04g35090
qShB4	Chr4	21332217	21335533	LOC_Os04g35100
qShB4	Chr4	21340765	21344577	LOC_Os04g35114
qShB4	Chr4	21349784	21353260	LOC_Os04g35130
qShB4	Chr4	21358864	21362109	LOC_Os04g35140
qShB4	Chr4	21362368	21365387	LOC_Os04g36640
qShB4	Chr4	21368526	21371720	LOC_Os04g35160
qShB4	Chr4	21373510	21377751	LOC_Os04g35170
qShB4	Chr4	21376942	21379536	LOC_Os04g35180
qShB4	Chr4	21381110	21385352	LOC_Os04g35190
qShB4	Chr4	21385306	21387592	LOC_Os04g35200
qShB4	Chr4	21396781	21401936	LOC_Os04g35210
qShB4	Chr4	21402388	21405386	LOC_Os04g35220
qShB4	Chr4	21408507	21411868	LOC_Os04g35230
qShB4	Chr4	21414496	21419956	LOC_Os04g35240
qShB4	Chr4	21424207	21425721	LOC_Os04g35250
qShB4	Chr4	21429477	21445422	LOC_Os04g35260
qShB4	Chr4	21447896	21449455	LOC_Os04g35270
qShB4	Chr4	21451493	21456040	LOC_Os04g35280
qShB4	Chr4	21462033	21465044	LOC_Os04g35290
qShB4	Chr4	21466485	21468612	LOC_Os04g35300
qShB4	Chr4	21468980	21470947	LOC_Os04g35305
qShB4	Chr4	21472975	21474453	LOC_Os04g35310
qShB4	Chr4	21480162	21483171	LOC_Os04g35320
qShB4	Chr4	21483798	21489954	LOC_Os04g35330
qShB4	Chr4	21491469	21494242	LOC_Os04g35340
qShB4	Chr4	21506029	21508807	LOC_Os04g35370
qShB4	Chr4	21513469	21519031	LOC_Os04g35380
qShB4	Chr4	21525529	21526696	LOC_Os04g35390
qShB4	Chr4	21539450	21543604	LOC_Os04g35410
qShB4	Chr4	21547034	21558315	LOC_Os04g35420	-	OsRecQl4	Others	Others	4	21569256	21580516	Os04g0433800	-	Overexpression	Processing of double-strand break sites.	10.1093/pcp/pcs155
qShB4	Chr4	21559229	21565988	LOC_Os04g35430
qShB4	Chr4	21570317	21572221	LOC_Os04g35440
qShB4	Chr4	21575732	21578431	LOC_Os04g35450
qShB4	Chr4	21579250	21581392	LOC_Os04g35460
qShB4	Chr4	21583815	21585409	LOC_Os04g35470
qShB4	Chr4	21591640	21595329	LOC_Os04g35480
qShB4	Chr4	21595744	21597815	LOC_Os04g35490
qShB4	Chr4	21600633	21601904	LOC_Os04g35500
qShB4	Chr4	21609373	21611533	LOC_Os04g35510
qShB4	Chr4	21622953	21627315	LOC_Os04g35520	chloroplast ascorbate peroxidase 7	OsAPX7	Physiological trait	Source activity	4	21645173	21649520	Os04g0434800	-	Knockdown	Photosynthesis and protection underphoto-oxidative stress.	10.1016/j.plantsci.2013.10.001
qShB4	Chr4	21629566	21632840	LOC_Os04g35530
qShB4	Chr4	21635089	21635820	LOC_Os04g35534
qShB4	Chr4	21637782	21642647	LOC_Os04g35540
qShB4	Chr4	21661324	21661772	LOC_Os04g35550
qShB4	Chr4	21662078	21664360	LOC_Os04g35560
qShB4	Chr4	21682409	21688306	LOC_Os04g35570
qShB4	Chr4	21692758	21693895	LOC_Os04g35580
qShB4	Chr4	21695440	21698631	LOC_Os04g35590
qShB4	Chr4	21699922	21702993	LOC_Os04g35600
qShB4	Chr4	21703600	21705657	LOC_Os04g35610
qShB4	Chr4	21706459	21710960	LOC_Os04g35620
qShB4	Chr4	21714821	21715981	LOC_Os04g35630
qShB4	Chr4	21716811	21719152	LOC_Os04g35640
qShB4	Chr4	21725300	21728240	LOC_Os04g35650
qShB4	Chr4	21733623	21734709	LOC_Os04g35660
qShB4	Chr4	21738700	21739707	LOC_Os04g35670
qShB4	Chr4	21745662	21747557	LOC_Os04g35680
qShB4	Chr4	21750917	21752359	LOC_Os04g35690
qShB4	Chr4	21752560	21758662	LOC_Os04g35700
qShB4	Chr4	21762940	21763692	LOC_Os04g35710
qShB4	Chr4	21767510	21768893	LOC_Os04g35720
qShB4	Chr4	21769971	21770663	LOC_Os04g35730
qShB4	Chr4	21785488	21786227	LOC_Os04g35739
qShB4	Chr4	21791507	21792300	LOC_Os04g35750
qShB4	Chr4	21792887	21795243	LOC_Os04g35760
qShB4	Chr4	21795403	21797246	LOC_Os04g35770
qShB4	Chr4	21799199	21801947	LOC_Os04g35780
qShB4	Chr4	21812157	21816178	LOC_Os04g35790
qShB4	Chr4	21817394	21823723	LOC_Os04g35800
qShB4	Chr4	21827097	21828508	LOC_Os04g35810
qShB4	Chr4	21829938	21830249	LOC_Os04g35820
qShB4	Chr4	21835911	21839986	LOC_Os04g35830
qShB4	Chr4	21842286	21848136	LOC_Os04g35840
qShB4	Chr4	21853482	21856316	LOC_Os04g35860
qShB4	Chr4	21856902	21858679	LOC_Os04g35864
qShB4	Chr4	21858813	21863618	LOC_Os04g35870
qShB4	Chr4	21863861	21867815	LOC_Os04g35880
qShB4	Chr4	21878935	21881781	LOC_Os04g35890
qShB4	Chr4	21886998	21892987	LOC_Os04g35900
qShB4	Chr4	21893258	21896405	LOC_Os04g35910
qShB4	Chr4	21897084	21904760	LOC_Os04g35920
qShB4	Chr4	21905944	21908871	LOC_Os04g35930
qShB4	Chr4	21912154	21914413	LOC_Os04g35940
qShB4	Chr4	21916041	21922164	LOC_Os04g35950
qShB4	Chr4	21923050	21926083	LOC_Os04g35960
qShB4	Chr4	21930102	21933557	LOC_Os04g35970
qShB4	Chr4	21937002	21939172	LOC_Os04g35980
qShB4	Chr4	21942199	21946604	LOC_Os04g35990
qShB4	Chr4	21948796	21951830	LOC_Os04g36000
qShB4	Chr4	21956992	21961103	LOC_Os04g36010
qShB4	Chr4	21964632	21965891	LOC_Os04g36020
qShB4	Chr4	21966332	21969852	LOC_Os04g36030
qShB4	Chr4	21970786	21975919	LOC_Os04g36040
qShB4	Chr4	21989516	21995087	LOC_Os04g36050
qShB4	Chr4	22006216	22012023	LOC_Os04g36054
qShB4	Chr4	22014111	22017090	LOC_Os04g36058
qShB4	Chr4	22017861	22024724	LOC_Os04g36062
qShB4	Chr4	22023832	22027680	LOC_Os04g36070	RESPONSE REGULATOR1	OsRR1	Morphological trait	Root	4	22046053	22049901	Os04g0442300	-	Overexpression	Crown root development.	10.1111/j.1365-313X.2011.04610.x
qShB4	Chr4	22059907	22062148	LOC_Os04g36570
qShB4	Chr4	22067484	22072320	LOC_Os04g36580
qShB4	Chr4	22074971	22077951	LOC_Os04g36590
qShB4	Chr4	22078631	22079516	LOC_Os04g36600
qShB4	Chr4	22081905	22084258	LOC_Os04g36610
qShB4	Chr4	22087648	22093469	LOC_Os04g36620
qShB4	Chr4	22095006	22097462	LOC_Os04g36630
qShB4	Chr4	22143760	22144352	LOC_Os04g36650
qShB4	Chr4	22149759	22155396	LOC_Os04g36660
qShB4	Chr4	22157298	22159246	LOC_Os04g36670
qShB4	Chr4	22161607	22166249	LOC_Os04g36680
qShB4	Chr4	22168281	22171089	LOC_Os04g36700
qShB4	Chr4	22176232	22177641	LOC_Os04g36710
qShB4	Chr4	22182599	22186943	LOC_Os04g36720
qShB4	Chr4	22189014	22191831	LOC_Os04g36730
qShB4	Chr4	22192042	22197439	LOC_Os04g36740
qShB4	Chr4	22200999	22201941	LOC_Os04g36750
qShB4	Chr4	22203113	22203965	LOC_Os04g36760
qShB4	Chr4	22205218	22205925	LOC_Os04g36770
qShB4	Chr4	22206762	22209496	LOC_Os04g36780
qShB4	Chr4	22212579	22214515	LOC_Os04g36790
qShB4	Chr4	22216909	22221345	LOC_Os04g36800
qShB4	Chr4	22223723	22227217	LOC_Os04g36810
qShB4	Chr4	22229872	22230571	LOC_Os04g36820
qShB4	Chr4	22231245	22239010	LOC_Os04g36830
qShB4	Chr4	22239221	22242241	LOC_Os04g36840
qShB4	Chr4	22243852	22246382	LOC_Os04g36850
qShB4	Chr4	22246672	22249716	LOC_Os04g36859
qShB4	Chr4	22257129	22257503	LOC_Os04g36880
qShB4	Chr4	22258294	22262579	LOC_Os04g36890
qShB4	Chr4	22264613	22266617	LOC_Os04g36900
qShB4	Chr4	22267085	22272335	LOC_Os04g36910
qShB4	Chr4	22284305	22285634	LOC_Os04g37410
qShB4	Chr4	22287556	22287780	LOC_Os04g37420
qShB4	Chr4	22305064	22309320	LOC_Os04g37430
qShB4	Chr4	22312254	22312712	LOC_Os04g37440
qShB4	Chr4	22313156	22313951	LOC_Os04g37450
qShB4	Chr4	22314071	22316433	LOC_Os04g37460
qShB4	Chr4	22316817	22319418	LOC_Os04g37470
qShB4	Chr4	22321189	22323559	LOC_Os04g37480
qShB4	Chr4	22323860	22326907	LOC_Os04g37490
qShB4	Chr4	22330188	22332565	LOC_Os04g37500	Glutamate decarboxylase 2	OsGAD2	Others	Others	4	22728719	22731041	Os04g0447800	-	Others	Pleiotropic developmental defect. GABA level.	10.1093/jxb/erm120
qShB4	Chr4	22332676	22333107	LOC_Os04g37510
qShB4	Chr4	22335011	22337426	LOC_Os04g37520
qShB4	Chr4	22337499	22339890	LOC_Os04g37530
qShB4	Chr4	22340794	22346494	LOC_Os04g37540
qShB4	Chr4	22347937	22349799	LOC_Os04g37550
qShB4	Chr4	22350424	22350672	LOC_Os04g37560
qShB4	Chr4	22353707	22355207	LOC_Os04g37570
qShB4	Chr4	22354947	22357999	LOC_Os04g37580
qShB4	Chr4	22358725	22361576	LOC_Os04g37590
qShB4	Chr4	22362239	22367204	LOC_Os04g37600
qShB4	Chr4	22369632	22376812	LOC_Os04g37619
qShB4	Chr4	22377034	22379348	LOC_Os04g37630
qShB4	Chr4	22381340	22383531	LOC_Os04g37640
qShB4	Chr4	22385358	22387707	LOC_Os04g37650
qShB4	Chr4	22389303	22393831	LOC_Os04g37660
qShB4	Chr4	22396529	22401800	LOC_Os04g37670
qShB4	Chr4	22411902	22412993	LOC_Os04g37680
qShB4	Chr4	22414498	22419160	LOC_Os04g37690
qShB4	Chr4	22425447	22426575	LOC_Os04g37700
qShB4	Chr4	22428827	22431579	LOC_Os04g37710
qShB4	Chr4	22432173	22434744	LOC_Os04g37720
qShB4	Chr4	22435061	22436870	LOC_Os04g37730
qShB4	Chr4	22441954	22443707	LOC_Os04g37740
qShB4	Chr4	22445324	22447425	LOC_Os04g37750
qShB4	Chr4	22448031	22450542	LOC_Os04g37760
qShB4	Chr4	22452022	22452695	LOC_Os04g37770
qShB4	Chr4	22466367	22469010	LOC_Os04g37790
qShB4	Chr4	22471090	22471464	LOC_Os04g37800
qShB4	Chr4	22472184	22479705	LOC_Os04g37810
qShB4	Chr4	22481487	22483269	LOC_Os04g37820
qShB4	Chr4	22489000	22491112	LOC_Os04g37830
qShB4	Chr4	22494649	22499199	LOC_Os04g37840
qShB4	Chr4	22517356	22520652	LOC_Os04g37850
qShB4	Chr4	22520791	22521877	LOC_Os04g37860
qShB4	Chr4	22524333	22527371	LOC_Os04g37870
qShB4	Chr4	22530922	22531513	LOC_Os04g37880
qShB4	Chr4	22532232	22533701	LOC_Os04g37890
qShB4	Chr4	22534358	22541033	LOC_Os04g37904
qShB4	Chr4	22549901	22555082	LOC_Os04g37920	cryptochrome 1b	cry1b	Morphological trait	Shoot seedling	4	22948432	22953569	Os04g0452100	-	Mutant	Leaf sheath elongation during seedling stage. Gibberellin metabolism.	10.1093/pcp/pcs097
qShB4	Chr4	22555757	22559623	LOC_Os04g37930
qShB4	Chr4	22562908	22566793	LOC_Os04g37940
qShB4	Chr4	22567318	22573600	LOC_Os04g37950
qShB4	Chr4	22583456	22592933	LOC_Os04g37960	-	zep1	Physiological trait	Sterility	4	22981985	22990327	Os04g0452500	-	Mutant	Fertility. Number of crossover during meiosis.	10.1105/tpc.109.070789
qShB4	Chr4	22594108	22595839	LOC_Os04g37970
qShB4	Chr4	22598600	22601305	LOC_Os04g37980
qShB4	Chr4	22611843	22620016	LOC_Os04g37990
qShB4	Chr4	22622402	22622766	LOC_Os04g38000
qShB4	Chr4	22626439	22628157	LOC_Os04g38010
qShB4	Chr4	22627207	22633284	LOC_Os04g38026
qShB4	Chr4	22645052	22648129	LOC_Os04g38042
qShB4	Chr4	22650268	22653067	LOC_Os04g38060
qShB4	Chr4	22656234	22662465	LOC_Os04g38070
qShB4	Chr4	22672491	22676283	LOC_Os04g38090
qShB4	Chr4	22678175	22678840	LOC_Os04g38100
qShB4	Chr4	22679981	22682297	LOC_Os04g38110
qShB4	Chr4	22689964	22692016	LOC_Os04g38120
qShB4	Chr4	22693749	22696503	LOC_Os04g38129
qShB4	Chr4	22698772	22701065	LOC_Os04g38140
qShB4	Chr4	22704583	22705932	LOC_Os04g38150
qShB4	Chr4	22709650	22710791	LOC_Os04g38160
qShB4	Chr4	22712261	22714857	LOC_Os04g38170
qShB4	Chr4	22716691	22723299	LOC_Os04g38180
qShB4	Chr4	22726484	22733234	LOC_Os04g38190
qShB4	Chr4	22735407	22737852	LOC_Os04g38200
qShB4	Chr4	22744184	22748089	LOC_Os04g38220
qShB4	Chr4	22748658	22751226	LOC_Os04g38230
qShB4	Chr4	22753293	22759109	LOC_Os04g38240
qShB4	Chr4	22759451	22760351	LOC_Os04g38250
qShB4	Chr4	22761339	22766176	LOC_Os04g38260
qShB4	Chr4	22773468	22778458	LOC_Os04g38270
qShB4	Chr4	22779285	22779555	LOC_Os04g38274
qShB4	Chr4	22783410	22784119	LOC_Os04g38280
qShB4	Chr4	22784737	22791327	LOC_Os04g38290
qShB4	Chr4	22792452	22793913	LOC_Os04g38300
qShB4	Chr4	22795145	22798778	LOC_Os04g38310
qShB4	Chr4	22800575	22801441	LOC_Os04g38320
qShB4	Chr4	22802295	22806020	LOC_Os04g38330
qShB4	Chr4	22806702	22812161	LOC_Os04g38340
qShB4	Chr4	22813619	22814445	LOC_Os04g38350
qShB4	Chr4	22821030	22821727	LOC_Os04g38360
qShB4	Chr4	22822268	22822926	LOC_Os04g38370
qShB4	Chr4	22825544	22826598	LOC_Os04g38380
qShB4	Chr4	22829317	22830421	LOC_Os04g38390
qShB4	Chr4	22834019	22835356	LOC_Os04g38400
qShB4	Chr4	22835896	22837594	LOC_Os04g38410
qShB4	Chr4	22837855	22840529	LOC_Os04g38420
qShB4	Chr4	22848936	22851644	LOC_Os04g38430
qShB4	Chr4	22855359	22861007	LOC_Os04g38450
qShB4	Chr4	22862855	22863418	LOC_Os04g38460
qShB4	Chr4	22865860	22866935	LOC_Os04g38470
qShB4	Chr4	22867268	22872511	LOC_Os04g38480	somatic embryogenesis receptor-like kinase 1	OsSERK1	Resistance or Tolerance	Blast resistance	4	23265887	23271042	Os04g0457800	-	Overexpression	Resistance to Magnaporthe grisea.	10.1007/s00425-005-1534-4
qShB4	Chr4	22878971	22879875	LOC_Os04g38490
qShB4	Chr4	22880786	22881383	LOC_Os04g38500
qShB4	Chr4	22883459	22883984	LOC_Os04g38510
qShB4	Chr4	22886648	22892744	LOC_Os04g38520
qShB4	Chr4	22886648	22892510	LOC_Os04g38525
qShB4	Chr4	22893765	22898657	LOC_Os04g38530
qShB4	Chr4	22902577	22905751	LOC_Os04g38540
qShB4	Chr4	22908526	22910057	LOC_Os04g38550
qShB4	Chr4	22910389	22912423	LOC_Os04g38560
qShB4	Chr4	22914742	22921316	LOC_Os04g38570	ATP Binding cassette B subgroup member 14	OsABCB14	Physiological trait	Root	4	23319542	23313303	Os04g0459000	-	Knockdown	&quot;auxin influx transporter involved in Fe homeostasis, &quot;	10.1111/tpj.12544
qShB4	Chr4	22925594	22926376	LOC_Os04g38580
qShB4	Chr4	22937056	22939073	LOC_Os04g38600
qShB4	Chr4	22939140	22942394	LOC_Os04g38610
qShB4	Chr4	22943177	22946878	LOC_Os04g38620
qShB4	Chr4	22947805	22951875	LOC_Os04g38630
qShB4	Chr4	22954845	22960460	LOC_Os04g38640
qShB4	Chr4	22962172	22962804	LOC_Os04g38650
qShB4	Chr4	22969845	22970964	LOC_Os04g38660
qShB4	Chr4	22971796	22972312	LOC_Os04g38670
qShB4	Chr4	22977814	22980352	LOC_Os04g38680
qShB4	Chr4	22982380	22983564	LOC_Os04g38690
qShB4	Chr4	22983741	22989200	LOC_Os04g38700
qShB4	Chr4	22991449	22993550	LOC_Os04g38710
qShB4	Chr4	22994552	22996740	LOC_Os04g38720	Oryza miR164-targeted NAC gene 2	OMTN2	Physiological trait	Panicle flower	4	23393100	23395163	Os04g0460600	-	Overexpression	low spikelet fertility	10.1093/jxb/eru072
qShB4	Chr4	23001495	23003542	LOC_Os04g38730
qShB4	Chr4	23024022	23026644	LOC_Os04g38740
qShB4	Chr4	23027339	23029083	LOC_Os04g38750
qShB4	Chr4	23032055	23033952	LOC_Os04g38760
qShB4	Chr4	23040160	23041485	LOC_Os04g38770
qShB4	Chr4	23045654	23048272	LOC_Os04g38780
qShB4	Chr4	23059405	23060944	LOC_Os04g38790
qShB4	Chr4	23076867	23077412	LOC_Os04g38800
qShB4	Chr4	23078317	23081438	LOC_Os04g38810
qShB4	Chr4	23085980	23087964	LOC_Os04g38820
qShB4	Chr4	23088970	23091700	LOC_Os04g38830
qShB4	Chr4	23093153	23094076	LOC_Os04g38840
qShB4	Chr4	23094207	23095901	LOC_Os04g38850
qShB4	Chr4	23097996	23100389	LOC_Os04g38860
qShB4	Chr4	23104041	23107594	LOC_Os04g38870
qShB4	Chr4	23108124	23110736	LOC_Os04g38880
qShB4	Chr4	23111007	23111983	LOC_Os04g38885
qShB4	Chr4	23113136	23113527	LOC_Os04g38890
qShB4	Chr4	23116120	23117963	LOC_Os04g38900
qShB4	Chr4	23120211	23122727	LOC_Os04g38910
qShB4	Chr4	23125233	23126052	LOC_Os04g38914
qShB4	Chr4	23128561	23129976	LOC_Os04g38920
qShB4	Chr4	23131673	23133502	LOC_Os04g38930
qShB4	Chr4	23134255	23137290	LOC_Os04g38940	Vacuolar Iron Transporter 1	OsVIT1	Physiological trait	Eating quality	4	23532796	23535645	Os04g0463400	-	Mutant	Fe and Zn translocation. Fe and Zn content in seed.	10.1111/j.1365-313X.2012.05088.x
qShB4	Chr4	23139158	23142821	LOC_Os04g38950	tryptophan deficient dwarf 1	tdd1	Morphological trait	Root	4	23537731	23541357	Os04g0463500	-	Mutant	Dwarfism. Narrowed leaf. Root growth. Floral organ formation. Embryo formation. Trp biosynthesis. Auxin biosynthesis.	10.1111/j.1365-313X.2009.03952.x
qShB4	Chr4	23144988	23147456	LOC_Os04g38960
qShB4	Chr4	23148230	23151738	LOC_Os04g38970
qShB4	Chr4	23153801	23158503	LOC_Os04g38980
qShB4	Chr4	23159815	23161767	LOC_Os04g38990
qShB4	Chr4	23163348	23163836	LOC_Os04g39000
qShB4	Chr4	23165555	23166329	LOC_Os04g39010
qShB4	Chr4	23171426	23176369	LOC_Os04g39020	betaine aldehyde dehydrogenase 1	OsBADH1	Physiological trait	Seed	4	23574872	23570056	Os04g0464200	-	Knockdown	grain weight	10.1007/s00122-014-2393-9
qShB4	Chr4	23178662	23182857	LOC_Os04g39030
qShB4	Chr4	23185921	23190787	LOC_Os04g39040
qShB4	Chr4	23190942	23192233	LOC_Os04g39050
qShB4	Chr4	23212145	23218087	LOC_Os04g39060
qShB4	Chr4	23220086	23221918	LOC_Os04g39070
qShB4	Chr4	23226180	23228272	LOC_Os04g39080
qShB4	Chr4	23228941	23234980	LOC_Os04g39090
qShB4	Chr4	23235806	23237196	LOC_Os04g39100
qShB4	Chr4	23242283	23243202	LOC_Os04g39110
qShB4	Chr4	23269539	23270191	LOC_Os04g39120
qShB4	Chr4	23272614	23275363	LOC_Os04g39130
qShB4	Chr4	23275514	23277462	LOC_Os04g39140
qShB4	Chr4	23278471	23279498	LOC_Os04g39150
qShB4	Chr4	23284808	23290538	LOC_Os04g39160
qShB4	Chr4	23291277	23295193	LOC_Os04g39170
qShB4	Chr4	23294062	23298005	LOC_Os04g39180
qShB4	Chr4	23305691	23311347	LOC_Os04g39190
qShB4	Chr4	23311987	23312571	LOC_Os04g39200
qShB4	Chr4	23315116	23319022	LOC_Os04g39210
qShB4	Chr4	23318366	23326781	LOC_Os04g39220
qShB4	Chr4	23329864	23331046	LOC_Os04g39230
qShB4	Chr4	23331129	23336945	LOC_Os04g39240
qShB4	Chr4	23354435	23355889	LOC_Os04g39250
qShB4	Chr4	23356993	23361835	LOC_Os04g39260
qShB4	Chr4	23362168	23365712	LOC_Os04g39270
qShB4	Chr4	23367176	23372741	LOC_Os04g39280
qShB4	Chr4	23382264	23383032	LOC_Os04g39290
qShB4	Chr4	23388563	23389490	LOC_Os04g39300
qShB4	Chr4	23404682	23406199	LOC_Os04g39310
qShB4	Chr4	23408376	23410250	LOC_Os04g39320
qShB4	Chr4	23413038	23414475	LOC_Os04g39330
qShB4	Chr4	23417023	23417475	LOC_Os04g39340
qShB4	Chr4	23422507	23423339	LOC_Os04g39350
qShB4	Chr4	23428149	23428543	LOC_Os04g39360
qShB4	Chr4	23430147	23431873	LOC_Os04g39370
qShB4	Chr4	23435707	23436503	LOC_Os04g39380
qShB4	Chr4	23446148	23449149	LOC_Os04g39390
qShB4	Chr4	23450040	23456195	LOC_Os04g39400
qShB4	Chr4	23457977	23461347	LOC_Os04g39410
qShB4	Chr4	23463357	23465733	LOC_Os04g39420
qShB4	Chr4	23467128	23471594	LOC_Os04g39430	clustered spikelets 4	CL4 (= dwarf11)	Morphological trait	Seed	4	23867864	23865707	Os04g0469800	-	Knockdown	&quot;grain length, grain width&quot;	10.1007/s11434-014-0568-z
qShB4	Chr4	23492935	23495366	LOC_Os04g39440
qShB4	Chr4	23497156	23499370	LOC_Os04g39444
qShB4	Chr4	23500021	23502611	LOC_Os04g39450
qShB4	Chr4	23506845	23509631	LOC_Os04g39460
qShB4	Chr4	23510412	23512029	LOC_Os04g39470
qShB4	Chr4	23512378	23523092	LOC_Os04g39489
qShB4	Chr4	23524195	23525271	LOC_Os04g39510
qShB4	Chr4	23527325	23532361	LOC_Os04g39520
qShB4	Chr4	23535422	23537490	LOC_Os04g39530
qShB4	Chr4	23543942	23546897	LOC_Os04g39540
qShB4	Chr4	23553702	23560694	LOC_Os04g39560
qShB4	Chr4	23579837	23587188	LOC_Os04g39570
qShB4	Chr4	23596462	23596842	LOC_Os04g39580
qShB4	Chr4	23598093	23599261	LOC_Os04g39590
qShB4	Chr4	23599540	23600705	LOC_Os04g39600

## Sheet: Sheet2
Yamamoto, E., Yonemaru, J., Yamamoto, T. & Yano, M. OGRO: the overview of functionally characterized Genes in Rice online database. Rice 5, 26 (2012).
http://qtaro.abr.affrc.go.jp/ogro/
Weed
QTL	Chr	Start	End	Gene	Gene full name	Gene name	General function			Function description	Paper
qShB1-2	Chr1	7024297	7030610	LOC_Os01g12710	non-yellow coloring1	nyc1	Physiological trait	Source activity	Mutant	Chlorophyll degradation during senescence.	10.1105/tpc.106.042911
qShB1-2	Chr1	7164594	7167419	LOC_Os01g12900	OsRac1	OsRac1	Resistance or Tolerance	Blast resistance	Knockdown Overexpression	Bacterial blight and blast resistance. Production of reactive oxygen intermediates.	10.1073/pnas.98.2.759
qShB1-2	Chr1	8196003	8197164	LOC_Os01g14650	a-expansin gene 8	OsEXPA8	Morphological trait	Culm leaf	Overexpression	Root development. Plant height. Leaf size.	10.1371/journal.pone.0075997
qShB1-4	Chr1	20581615	20589583	LOC_Os01g36930	ubiquitin specific protease 6	osubp6	Morphological trait	Shoot seedling	Mutant	Growth speed during seedling stage.	10.1007/s10059-009-0138-4
qShB1-4	Chr1	21230393	21234929	LOC_Os01g37910	Oryza sativa legumain 1	OsaLeg1	Others	Others	Others	&quot;wounding response, vegetative-related protease&quot;	10.1016/j.plantsci.2013.11.005.?
qShB1-4	Chr1	21938865	21941839	LOC_Os01g39020	heat shock transcription factor7	OsHsfA7	Resistance or Tolerance	Salinity tolerance	Overexpression	Drought and salinity tolerance.	10.5483/BMBRep.2013.46.1.090
qShB1-4	Chr1	22353190	22358405	LOC_Os01g39630	RAD51C	RAD51C	Resistance or Tolerance	Other stress resistance	Mutant	Male and female sterility. UV tolerance.	10.1093/jxb/ers190
qShB1-4	Chr1	22375575	22377560	LOC_Os01g39670	SaF	SaF	Physiological trait	Sterility	Natural variation	Hybrid male sterility. Pollen development. Interaction with SaM	10.1073/pnas.0810108105
qShB1-4	Chr1	22379059	22383049	LOC_Os01g39680	SaM	SaM	Physiological trait	Sterility	Natural variation	Hybrid male sterility. Pollen development. Interaction with SaF	10.1073/pnas.0810108105
qShB1-4	Chr1	22489496	22491483	LOC_Os01g39860	ACC oxidase 7	OsACO7	Resistance or Tolerance	Blast resistance	Knockdown	Ethylene and Cyanide production. Resistance to blast fungus via restriction of fungal growth.	10.1104/pp.110.162412
qShB1-4	Chr1	22954908	22959225	LOC_Os01g40630	LONELY GUY	log	Morphological trait	Panicle flower	Mutant	Panicle size and branching patterns. Number of floral organs. Maintenance of shoot meristems. Cytokinin activation.	10.1038/nature05504
qShB1-4	Chr1	24292537	24299697	LOC_Os01g42710	LSD1 ortholog 2	OsLOL2	Morphological trait	Dwarf	Knockdown Overexpression	Bacterial blight resistance. Dwafism restored by exogenous GA3 treatment.	10.1007/s00438-007-0232-2
qShB1-4	Chr1	24380636	24386687	LOC_Os01g42850	autophagy associated gene 7	OsATG7	Physiological trait	Sterility	Knockdown	&quot;pollen maturation, degradation of ingracellular components in the tapetum, lipid metabolism of pollen grains through Lands cycle-mediated phosphatidylcholine&quot;	10.4161/auto.28279
qShB1-3	Chr1	29166419	29170411	LOC_Os01g50770	spotted leaf28	spl28*	Physiological trait	Source activity	Mutant	&quot;Spotted leaf. Bacterial blight and blast resistance. Chlorophyll content. Soluble protein content. Photosystem II efficiency. Concentrations of reactive oxygen species, phytoalexin, callose, and autofluorescent phenolic compounds.&quot;	10.1111/j.1469-8137.2009.03047.x
qShB1-3	Chr1	29188850	29190965	LOC_Os01g50820	high affinity NRT2 family 3a	OsNRT2.3a	Resistance or Tolerance	Other soil stress tolerance	Knockdown	Nitrate translocation.	10.1104/pp.112.204461
qShB1-3	Chr1	29637792	29642902	LOC_Os01g51610	LEC2 and FUSCA3 Like 1	OsLFL	Physiological trait	Flowering	Mutant	Flowering time.	10.1016/j.jplph.2007.07.010
qShB1-3	Chr1	29927543	29931487	LOC_Os01g52050	dwarf 61	d61	Morphological trait	Dwarf	Mutant	Brassinosteroid sensitivity. Dwarfism. Leaf angle. Skotomorphogenesis.	10.1105/tpc.12.9.1591
qShB1-3	Chr1	29965064	29970767	LOC_Os01g52110	rice RING zinc-finger protein 34	OsRZFP34	Physiological trait	Culm leaf	Knockdown Overexpression	&quot;regulating leaf temperature under heat and ABA treatment, stomatal opening and transpiration cooling under high temperature&quot;	10.1007/s11103-014-0217-6
qShB1-3	Chr1	30278492	30280577	LOC_Os01g52680	CHIMERIC FLORAL ORGANS 1	CFO1	Morphological trait	Panicle flower	Mutant	Floral organ formation.	10.1104/pp.112.200980
qShB1-3	Chr1	30622671	30634405	LOC_Os01g53294	respiratory burst oxidase homologsA	OsrbohA	Resistance or Tolerance	Other stress resistance	Knockdown	Reactive oxygen species production after treatment with flagellin in cultured cell.	10.5511/plantbiotechnology.22.127
qShB1-3	Chr1	31220321	31228566	LOC_Os01g54270	dwarf10	d10	Morphological trait	Root	Mutant	Strigolactone biosynthesis. Crown root length.	10.1007/s00344-011-9228-6
qShB1-3	Chr1	31367015	31369416	LOC_Os01g54540	white leaf and panicles 1	WLP1	Morphological trait	Culm leaf	Knockdown	&quot;chloroplast development, thermo-sensitivity albino phenotype&quot;	10.1007/s11103-013-0134-0
qShB1-3	Chr1	31409004	31410978	LOC_Os01g54600	OsWRKY13	OsWRKY13	Resistance or Tolerance	Drought tolerance	Overexpression	Drought tolerance.	10.1104/pp.113.226019
qShB1-3	Chr1	31422946	31428688	LOC_Os01g54620	cellulose synthase catalytic subunit A4	OsCesA4	Resistance or Tolerance	Lodging resistance	Mutant	Brittle culm. Cellulose contents in culm.	10.1104/pp.103.022442
qShB1-3	Chr1	31524048	31527177	LOC_Os01g54810	&quot;high tillering, reduced height, and infertile spikelets 1&quot;	this1	Physiological trait	Sterility	Mutant	Tillering. Pollen development.	10.1093/jxb/ert256
qShB1-3	Chr1	31761223	31763887	LOC_Os01g55200	-	OsKAT1	Resistance or Tolerance	Salinity tolerance	Overexpression	Salinity tolerance in protoplast. Maintenance of cytosolic cation homeostasis.	10.1104/pp.107.101154
qShB1-3	Chr1	31795105	31797643	LOC_Os01g55240	Gibberellin 2-Oxidase 3	GA2ox3	Morphological trait	Dwarf	Others	Dwarfism. Gibberellin catabolism.	10.1105/tpc.108.060913
qShB1-3	Chr1	31943528	31948580	LOC_Os01g55450	calcineurin B-like protein-interacting protein kinase12	OsCIPK12	Resistance or Tolerance	Drought tolerance	Overexpression	Drought tolerance.	10.1104/pp.107.101295
qShB1-3	Chr1	31998651	32003690	LOC_Os01g55540	Aspartate aminotransferase 2	OsAAT2	Physiological trait	Eating quality	Overexpression	Seed amino acid and protein content.	10.1007/s00122-009-0988-3
qShB1-3	Chr1	32076732	32078743	LOC_Os01g55690	glutelin a-2 subunit 4a	glu4a	Physiological trait	Eating quality	Mutant	Seed glutelin quality.	10.1007/s00122-003-1228-x
qShB1-3	Chr1	32221376	32225123	LOC_Os01g55940	OsGH3-2	OsGH3-2	Morphological trait	Culm leaf	Overexpression	Dwarfism. Tillering. Leaf size. Crown root development. Root hair development. Cold and drought tolerance.	10.1093/jxb/ers300
qShB1-3	Chr1	32848236	32852610	LOC_Os01g56880	Oryza sativa purple acid phosphatase 10a	OsPAP10a	Resistance or Tolerance	Other soil stress tolerance	Overexpression	Phosphate uptake and translocation.	10.1111/j.1744-7909.2012.01143.x
qShB1-3	Chr1	32893379	32899784	LOC_Os01g56940	-	OsExo1	Others	Others	Overexpression	Processing of double-strand break sites.	10.1093/pcp/pcs155
qShB1-3	Chr1	33116117	33124371	LOC_Os01g57310	Pi37	Pi37	Resistance or Tolerance	Blast resistance	Natural variation	Blast resistance.	10.1534/genetics.107.080648
qShB1-3	Chr1	33308448	33311391	LOC_Os01g57610	LEAF INCLINATION1	LC1	Morphological trait	Culm leaf	Mutant	Leaf angle.	10.1093/mp/sss064
qShB1-3	Chr1	33453433	33460087	LOC_Os01g57854	pectin methylesterase1	PME1	Physiological trait	Source activity	Knockdown Overexpression	Leaf senescence. MeOH-induced Trp and Trp-derived secondary metabolite biosynthesis.	10.1111/j.1365-313X.2011.04486.x
qShB1-3	Chr1	33691773	33696746	LOC_Os01g58290	Hybrid weakness	Hwi2	Resistance or Tolerance	Others	Others	activate Hwi1-perceived downstream defense responses	10.1038/ncomms4357
qShB1-3	Chr1	33766979	33768085	LOC_Os01g58420	AP2 domain37	AP37	Resistance or Tolerance	Drought tolerance	Overexpression	Grain yield under drought conditions.	10.1104/pp.109.137554
qShB1-3	Chr1	34149431	34152417	LOC_Os01g59120	Cyclin B1;1	Orysa;CycB1;1	Morphological trait	Seed	Knockdown	Endosperm formation. Embryo size.	10.1007/s00425-009-1051-y
qShB1-3	Chr1	34508364	34512781	LOC_Os01g59660	GAMYB	gamyb	Physiological trait	Sterility	Mutant	Pollen development.	10.1105/tpc.017327
qShB1-3	Chr1	34692830	34694391	LOC_Os01g60020	NAM-ATAF-CUC family 4	OsNAC4	Resistance or Tolerance	Bacterial blight resistance	Knockdown	Bacterial blight resistance. HR cell death.	10.1038/emboj.2009.39
qShB1-3	Chr1	35320780	35327164	LOC_Os01g61044	amino acid transporter7	OsAAT7	Physiological trait	Source activity	Mutant	Carbon and nitrogen content.	10.1007/s11738-012-0995-x
qShB1-3	Chr1	35558148	35559225	LOC_Os01g61480	LAX PANICLE	lax	Morphological trait	Panicle flower	Mutant	Lateral organ development. Axillary meristem formation.	10.1073/pnas.1932414100
qShB1-3	Chr1	35756334	35758551	LOC_Os01g61810	-	OsHAP3A	Physiological trait	Source activity	Knockdown	Chloroplast development.	10.1046/j.1365-313X.2003.01897.x
qShB1-3	Chr1	36001241	36002103	LOC_Os01g62190	zinc finger protein179	ZFP179	Resistance or Tolerance	Salinity tolerance	Overexpression	Salinity and oxidative stress tolerance.	10.1093/jxb/erq120
qShB1-3	Chr1	36002256	36005101	LOC_Os01g62200	DUF966-stress repressive gene 2	OsDSR2	Resistance or Tolerance	Drought tolerance	Overexpression	resistance to salt and drought stress	10.1007/s00299-013-1532-0
qShB1-3	Chr1	36122778	36128487	LOC_Os01g62410	-	OsMYB3R-2	Resistance or Tolerance	Cold tolerance	Overexpression	Cold tolerance.	10.1104/pp.108.133454
qShB1-3	Chr1	36445019	36449951	LOC_Os01g62920	QTL of seed shattering in chromosome 1	qSH1	Morphological trait	Panicle flower	Natural variation	Seed shattering.	10.1126/science.1126410
qShB1-3	Chr1	36746807	36750976	LOC_Os01g63420	CORONATINE INSENSITIVE1	OsCOI1	Resistance or Tolerance	Insect resistance	Knockdown	Resistance to rice leaf folder (Cnaphalocrocis medinalis) .	10.1371/journal.pone.0036214
qShB1-3	Chr1	36813724	36815023	LOC_Os01g63510	Quiescent center specific homeobox	QHB	Morphological trait	Shoot seedling	Overexpression	Crown root formation. Shoot formation	10.1046/j.1365-313X.2003.01816.x
qShB1-1	Chr1	37174547	37176550	LOC_Os01g64000	ABA insensitive 5	OsABI5	Physiological trait	Sterility	Knockdown Overexpression	Salinity tolerance. Fertility.	10.1007/s11103-008-9298-4
qShB1-3	Chr1	37174547	37176550	LOC_Os01g64000	ABA insensitive 5	OsABI5	Physiological trait	Sterility	Knockdown Overexpression	Salinity tolerance. Fertility.	10.1007/s11103-008-9298-4
qShB1-1	Chr1	37519523	37522613	LOC_Os01g64660	monoculm2	moc2	Morphological trait	Culm leaf	Mutant	Tiller bud outgrowth. Tillering.	10.5511/plantbiotechnology.12.1210a
qShB1-3	Chr1	37519523	37522613	LOC_Os01g64660	monoculm2	moc2	Morphological trait	Culm leaf	Mutant	Tiller bud outgrowth. Tillering.	10.5511/plantbiotechnology.12.1210a
qShB1-1	Chr1	37556674	37560104	LOC_Os01g64730	ABA responsive element binding factor 1	Osabf1	Resistance or Tolerance	Salinity tolerance	Mutant	Drought and salinity tolerance.	10.1007/s11103-009-9592-9
qShB1-3	Chr1	37556674	37560104	LOC_Os01g64730	ABA responsive element binding factor 1	Osabf1	Resistance or Tolerance	Salinity tolerance	Mutant	Drought and salinity tolerance.	10.1007/s11103-009-9592-9
qShB1-1	Chr1	37664117	37667349	LOC_Os01g64890	Oryza sativa Magnesium Transporter 1	OsMGT1	Resistance or Tolerance	Other soil stress tolerance	Mutant	&quot;Magnesium uptake. Aluminium, cadmium and lanthanum tolerance. &quot;	10.1104/pp.112.199778
qShB1-3	Chr1	37664117	37667349	LOC_Os01g64890	Oryza sativa Magnesium Transporter 1	OsMGT1	Resistance or Tolerance	Other soil stress tolerance	Mutant	&quot;Magnesium uptake. Aluminium, cadmium and lanthanum tolerance. &quot;	10.1104/pp.112.199778
qShB1-1	Chr1	37696778	37699752	LOC_Os01g64960	PsbS	PsbS	Physiological trait	Source activity	Knockdown Overexpression	Nonphotochemical quenching capacity. Photosynthetic rate in fluctuating light conditions.	10.1111/j.1365-313X.2012.04995.x
qShB1-3	Chr1	37696778	37699752	LOC_Os01g64960	PsbS	PsbS	Physiological trait	Source activity	Knockdown Overexpression	Nonphotochemical quenching capacity. Photosynthetic rate in fluctuating light conditions.	10.1111/j.1365-313X.2012.04995.x
qShB1-1	Chr1	37710241	37715296	LOC_Os01g64970	SNF1-type serine-threonine protein kinase4	SAPK4	Resistance or Tolerance	Salinity tolerance	Overexpression	Salinity tolerance. Ion homeostasis. Oxidative stress tolerance.	10.1186/1471-2229-8-49
qShB1-3	Chr1	37710241	37715296	LOC_Os01g64970	SNF1-type serine-threonine protein kinase4	SAPK4	Resistance or Tolerance	Salinity tolerance	Overexpression	Salinity tolerance. Ion homeostasis. Oxidative stress tolerance.	10.1186/1471-2229-8-49
qShB1-1	Chr1	37714296	37720652	LOC_Os01g64980	-	Os-pollux	Resistance or Tolerance	Other soil stress tolerance	Mutant	Mycorrhizal symbiosis.	10.1104/pp.108.131540
qShB1-3	Chr1	37714296	37720652	LOC_Os01g64980	-	Os-pollux	Resistance or Tolerance	Other soil stress tolerance	Mutant	Mycorrhizal symbiosis.	10.1104/pp.108.131540
qShB1-1	Chr1	37722310	37731905	LOC_Os01g64990	ammonium transporter 3;1	OsAMT3;1	Physiological trait	Root	Others	involvement in mycorrhizal N uptake pathway	10.1016/j.plaphy.2013.11.029.
qShB1-3	Chr1	37722310	37731905	LOC_Os01g64990	ammonium transporter 3;1	OsAMT3;1	Physiological trait	Root	Others	involvement in mycorrhizal N uptake pathway	10.1016/j.plaphy.2013.11.029.
qShB1-1	Chr1	37853404	37857523	LOC_Os01g65230	3-phosphoinositide-dependent protein kinase 1	OsPdk1	Resistance or Tolerance	Blast resistance	Mutant	Bacterial blight and blast resistance. Basal resistance.	10.1093/pcp/pcq167
qShB1-3	Chr1	37853404	37857523	LOC_Os01g65230	3-phosphoinositide-dependent protein kinase 1	OsPdk1	Resistance or Tolerance	Blast resistance	Mutant	Bacterial blight and blast resistance. Basal resistance.	10.1093/pcp/pcq167
qShB1-1	Chr1	38133431	38137770	LOC_Os01g65670	amino acid permease	OsAAP6	Physiological trait	Eating quality	Knockdown Overexpression	starch and storage protein biosynthesis in developing rice grain	10.1038/ncomms5847
qShB1-3	Chr1	38133431	38137770	LOC_Os01g65670	amino acid permease	OsAAP6	Physiological trait	Eating quality	Knockdown Overexpression	starch and storage protein biosynthesis in developing rice grain	10.1038/ncomms5847
qShB1-3	Chr1	38382382	38385504	LOC_Os01g66100	semi-dwarf 1	sd1	Morphological trait	Dwarf	Natural variation	Semi-dwarf. Gibberellin biosynthesis.	10.1038/416701a
qShB1-3	Chr1	38398517	38401533	LOC_Os01g66120	NAM-ATAF-CUC family 6	OsNAC6	Resistance or Tolerance	Salinity tolerance	Overexpression	Drought and salinity tolerance. Blast resistance. Growth retardation.	10.1111/j.1365-313X.2007.03168.x
qShB1-3	Chr1	39013759	39017951	LOC_Os01g67240	Formin homology 1	OsFH1	Morphological trait	Root	Mutant	Root hair elongation.	10.1007-s00425-013-1838-8
qShB1-3	Chr1	39052262	39058974	LOC_Os01g67290	Short postembryonic roots 1	Osspr1	Physiological trait	Source activity	Mutant	Root elongation. Fe uptake.	10.1111/j.1469-8137.2010.03513.x
qShB1-3	Chr1	39177169	39178676	LOC_Os01g67430	EXTRA GLUME1	eg1	Morphological trait	Panicle flower	Mutant	Spikelet development.	10.1111/j.1365-313X.2008.03710.x
qShB1-3	Chr1	39493173	39500045	LOC_Os01g67970	Jumonji C protein 705	JMJ705	Resistance or Tolerance	Bacterial blight resistance	Mutant	Resistance to Xanthomonas oryzae pv oryzae.	10.1105/tpc.113.118802
qShB1-3	Chr1	39501330	39502978	LOC_Os01g67980	senescence associated gene 12-1	OsSAG12-1	Resistance or Tolerance	Bacterial blight resistance	Knockdown	Leaf senescence. Resistance to Xanthomonas oryzae pv. oryzae.	10.1007/s12038-013-9334-7
qShB1-3	Chr1	39523638	39527227	LOC_Os01g68000	LEAFY HEAD2	lhd2	Morphological trait	Dwarf	Mutant	Plastochron. Tiller bud outgrowth. Dwarfism.	10.1038/sj.cr.7310034
qShB1-3	Chr1	39588269	39591239	LOC_Os01g68104	-	HDT702	Physiological trait	Sterility	Knockdown	Narrowed leaf. Dwarfism. Fertility.	10.1016/j.bbrc.2009.07.162
qShB1-3	Chr1	39595681	39605717	LOC_Os01g68120	rice Dicer-like 3	OsDCL3a	Morphological trait	Dwarf	Knockdown	dwarfism	10.1073/pnas.1318131111
qShB1-3	Chr1	39948062	39951534	LOC_Os01g68770	selenium-binding protein	OsSBP	Resistance or Tolerance	Blast resistance	Overexpression	Bacterial blight and blast resistance.	10.1271/bbb.68.873
qShB1-3	Chr1	40006067	40010941	LOC_Os01g68860	&quot;rice CCCH-type zinc finger proteins, C3H12&quot;	C3H12	Resistance or Tolerance	Bacterial blight resistance	Mutant	Resistance to Xanthomonas oryzae pv. oryzae. JA level.	10.1104/pp.111.191379
qShB1-3	Chr1	40016601	40023861	LOC_Os01g68870	MULTIPLE SPOROCYTE 1	msp1	Physiological trait	Sterility	Mutant	Number of male and female sporocytes. Development of pollen mother cells.	10.1105/tpc.012401
qShB1-3	Chr1	40093713	40096983	LOC_Os01g69010	OsFRDL4	OsFRDL4	Resistance or Tolerance	Other soil stress tolerance	Mutant	Aluminium tolerance.	10.1111/j.1365-313X.2011.04757.x
qShB1-3	Chr1	40101404	40107186	LOC_Os01g69030	sucrose phosphate synthase 1	OsSPS1	Physiological trait	Panicle flower	Mutant	pollen germination through sucrose synthesis	10.1016/j.plantsci.2014.05.018
qShB1-3	Chr1	40146507	40150833	LOC_Os01g69080	suppressor of salicylate insensitivity of npr1-5 2	OsSSI2	Morphological trait	Culm leaf	Mutant	Resistance to Magnaporthe grisea and Xanthomonas oryzae pv. oryzae. Spotted leaf. Growth retardation.	10.1094/MPMI-22-7-0820
qShB1-3	Chr1	40170871	40173290	LOC_Os01g69110	yellow2-like and ubiquitin hydrolase	-	Physiological trait	Others	Others	DNA methylation	10.1111/tpj.12553
qShB1-3	Chr1	40220890	40229264	LOC_Os01g69210	mannosyl-oligosaccharide glucosidase	OsMOGS	Physiological trait	Root	Mutant	&quot;N-glycan formation dependent cellulose synthetic activity and cell wall establishment, cell wall thickness&quot;	10.1111/tpj.12497
qShB1-3	Chr1	40344329	40364584	LOC_Os01g69850	OsMADS51	OsMADS51	Physiological trait	Flowering	Mutant	Flowering time under short day condition.	10.1104/pp.107.103291
qShB4	Chr4	21547034	21558315	LOC_Os04g35420	-	OsRecQl4	Others	Others	Overexpression	Processing of double-strand break sites.	10.1093/pcp/pcs155
qShB4	Chr4	21622953	21627315	LOC_Os04g35520	chloroplast ascorbate peroxidase 7	OsAPX7	Physiological trait	Source activity	Knockdown	Photosynthesis and protection underphoto-oxidative stress.	10.1016/j.plantsci.2013.10.001
qShB4	Chr4	22023832	22027680	LOC_Os04g36070	RESPONSE REGULATOR1	OsRR1	Morphological trait	Root	Overexpression	Crown root development.	10.1111/j.1365-313X.2011.04610.x
qShB4	Chr4	22330188	22332565	LOC_Os04g37500	Glutamate decarboxylase 2	OsGAD2	Others	Others	Others	Pleiotropic developmental defect. GABA level.	10.1093/jxb/erm120
qShB4	Chr4	22549901	22555082	LOC_Os04g37920	cryptochrome 1b	cry1b	Morphological trait	Shoot seedling	Mutant	Leaf sheath elongation during seedling stage. Gibberellin metabolism.	10.1093/pcp/pcs097
qShB4	Chr4	22583456	22592933	LOC_Os04g37960	-	zep1	Physiological trait	Sterility	Mutant	Fertility. Number of crossover during meiosis.	10.1105/tpc.109.070789
qShB4	Chr4	22867268	22872511	LOC_Os04g38480	somatic embryogenesis receptor-like kinase 1	OsSERK1	Resistance or Tolerance	Blast resistance	Overexpression	Resistance to Magnaporthe grisea.	10.1007/s00425-005-1534-4
qShB4	Chr4	22914742	22921316	LOC_Os04g38570	ATP Binding cassette B subgroup member 14	OsABCB14	Physiological trait	Root	Knockdown	&quot;auxin influx transporter involved in Fe homeostasis, &quot;	10.1111/tpj.12544
qShB4	Chr4	22994552	22996740	LOC_Os04g38720	Oryza miR164-targeted NAC gene 2	OMTN2	Physiological trait	Panicle flower	Overexpression	low spikelet fertility	10.1093/jxb/eru072
qShB4	Chr4	23134255	23137290	LOC_Os04g38940	Vacuolar Iron Transporter 1	OsVIT1	Physiological trait	Eating quality	Mutant	Fe and Zn translocation. Fe and Zn content in seed.	10.1111/j.1365-313X.2012.05088.x
qShB4	Chr4	23139158	23142821	LOC_Os04g38950	tryptophan deficient dwarf 1	tdd1	Morphological trait	Root	Mutant	Dwarfism. Narrowed leaf. Root growth. Floral organ formation. Embryo formation. Trp biosynthesis. Auxin biosynthesis.	10.1111/j.1365-313X.2009.03952.x
qShB4	Chr4	23171426	23176369	LOC_Os04g39020	betaine aldehyde dehydrogenase 1	OsBADH1	Physiological trait	Seed	Knockdown	grain weight	10.1007/s00122-014-2393-9
qShB4	Chr4	23467128	23471594	LOC_Os04g39430	clustered spikelets 4	CL4 (= dwarf11)	Morphological trait	Seed	Knockdown	&quot;grain length, grain width&quot;	10.1007/s11434-014-0568-z
qShB8	Chr8	4333717	4335434	LOC_Os08g07740	CCAAT-box-binding transcription factor	LH8	Physiological trait	Flowering	Others	flowering time	10.1038/srep04263
qShB8	Chr8	4344171	4350502	LOC_Os08g07760	-	OsBAK1	Morphological trait	Dwarf	Knockdown	Internode elongation. Leaf angle. Brassinosteroid sensitivity.	10.1111/j.1467-7652.2009.00444.x
Crop
QTL	Chr	Start	End	Gene	Gene full name	Gene name	General function			Function description	Paper
qShB3	Chr3	30406830	30409447	LOC_Os03g53020	basic helix-loop-helix domain148	OsbHLH148	Resistance or Tolerance	Drought tolerance	Overexpression	Drought tolerance.	10.1111/j.1365-313X.2010.04477.x
qShB3	Chr3	30679685	30689230	LOC_Os03g53500	suppressor of Var 3	OsSUV3	Resistance or Tolerance	Salinity tolerance	Overexpression	Drought and salinity tolerance.	10.1111/tpj.12277
qShB3	Chr3	31004724	31009782	LOC_Os03g54084	phytochromeC	phyC	Resistance or Tolerance	Blast resistance	Mutant	Resistance to Magnaporthe grisea.	10.1093/mp/ssr005
qShB3	Chr3	31009978	31013940	LOC_Os03g54091	-	OsSPO11-1	Physiological trait	Sterility	Knockdown	Germ cell development. Homologous pairing.	10.1007/s00412-010-0284-7
qShB3	Chr3	31031146	31041569	LOC_Os03g54160	MADS14	MADS14	Morphological trait	Panicle flower	Knockdown	Floral organ formation.	10.1105/tpc.112.097105
qShB3	Chr3	31048351	31055019	LOC_Os03g54170	mads34	osmads34	Morphological trait	Panicle flower	Mutant	Regulation of floral organ identity.	10.1104/pp.110.156711
qShB3	Chr3	31332396	31339163	LOC_Os03g55090	Plastidial phosphorylase1	pho1	Morphological trait	Seed	Mutant	Seed starch content. Grain maturation.	10.1105/tpc.107.054007
qShB3	Chr3	31440748	31446119	LOC_Os03g55240	-	bel	Resistance or Tolerance	Other stress resistance	Mutant	Herbicide resistance.	10.1007/s11103-006-0058-z
qShB3	Chr3	31508811	31514460	LOC_Os03g55389	heading date 6	Hd6	Physiological trait	Flowering	Natural variation	Flowering time.	10.1073/pnas.111136798
qShB3	Chr3	31725971	31732265	LOC_Os03g55730	cysteine-rich 10 kDa molecular species	CysR10	Physiological trait	Eating quality	Knockdown	Protein body formation in seed.	10.1093/pcp/pcr053
qShB3	Chr3	31964582	31970527	LOC_Os03g56110	Oryza sativa homeobox 43	OSH43	Morphological trait	Culm leaf	Overexpression	Ligule formation.	10.1006/dbio.2000.9624
qShB3	Chr3	32064251	32071108	LOC_Os03g56260	NUTRITION RESPONSE AND ROOT GROWTH a	NRRa	Physiological trait	Flowering	Knockdown	Flowering time.	10.1093/mp/sss157
qShB3	Chr3	32078642	32083640	LOC_Os03g56270	NUTRITION RESPONSE AND ROOT GROWTH b	NRRb	Physiological trait	Flowering	Knockdown	Flowering time.	10.1093/mp/sss157
qShB3	Chr3	32432456	32435845	LOC_Os03g56950	Phytochrome-interacting factor-like protein 1	OsPIL1	Morphological trait	Dwarf	Knockdown Overexpression	Internode elogation.	10.1073/pnas.1207324109
qShB3	Chr3	32628528	32632535	LOC_Os03g57220	glycolate oxidase 1	OsGLO1	Physiological trait	Source activity	Knockdown	Photorespiration.	10.1093/jxb/erp056
qShB3	Chr3	32645456	32647051	LOC_Os03g57240	regulator of Gn1a 1	reg1	Morphological trait	Panicle flower	Mutant	Plant height. Panicle size.	10.1073/pnas.1300359110
qShB3	Chr3	32751649	32755670	LOC_Os03g57450	Calcium-dependent protein kinase 10	OsCPK10	Resistance or Tolerance	Blast resistance	Overexpression	Resistance to Magnaporthe grisea.	10.1016/j.plaphy.2013.10.004
qShB3	Chr3	32859060	32866608	LOC_Os03g57660	PLASTOCHRON3/GOLIATH	pla3/gp	Morphological trait	Seed	Mutant	Dwarfism. Panicle identity. Plastochron. Grain size. SAM maintainance. ABA sensitivity during germination stage.	10.1111/j.1365-313X.2009.03841.x
qShB3	Chr3	32999502	33006898	LOC_Os03g57940	Heading date 16	Hd16	Physiological trait	Flowering	Natural variation	Flowering time.	10.1111/tpj.12268
qShB6-1	Chr6	2208673	2209562	LOC_Os06g05010	-	OsENOD93-1	Morphological trait	Dwarf	Overexpression	Dry biomass. Amino acid nitrogen content.	10.1111/j.1365-3040.2009.02032.x
qShB6-1	Chr6	2234119	2239162	LOC_Os06g05060	early flowering 7	ef7	Physiological trait	Flowering	Mutant	Flowering time independent of day length.	10.1093/pcp/pcs029
qShB6-1	Chr6	2498847	2502901	LOC_Os06g05520	mitogen-activated protein kinase kinase	OsMKK1 (MAPKK)	Resistance or Tolerance	Salinity tolerance	Knockdown	salinity tolerance by regulating OsMPK4	10.1016/j.plantsci.2014.08.007
qShB6-1	Chr6	2780715	2785271	LOC_Os06g06050	suppressors of lazy1	SOL1	Morphological trait	Shoot seedling	Mutant	&quot;shoot gravitropism, tiller angle, involvement of strigolactones (SLs) biosynthesis&quot;	10.1073/pnas.1411859111
qShB6-1	Chr6	2806543	2813004	LOC_Os06g06090	Mitogen-activated protein kinase6	OsMAPK6	Others	Others	Knockdown	Regulation of stress response genes.	10.1104/pp.104.057414
qShB6-1	Chr6	2926823	2928474	LOC_Os06g06300	RICE FLOWERING LOCUS T 1	RFT1	Physiological trait	Flowering	Natural variation	Flowering time.	10.1371/journal.pone.0075959
qShB6-1	Chr6	2940004	2942452	LOC_Os06g06320	heading date 3a	Hd3a	Physiological trait	Flowering	Natural variation	Flowering time under short day condition.	10.1093/pcp/pcf156
qShB6-1	Chr6	3079059	3086808	LOC_Os06g06560	Starch synthase 1	SS1	Physiological trait	Source activity	Others	&quot; starch biosynthesis in endosperm, chain elongation&quot;	10.1186/1471-2229-14-80
qShB6-1	Chr6	3162801	3169415	LOC_Os06g06750	OsMADS5	OsMADS5	Morphological trait	Panicle flower	Knockdown	Floral organ formation.	10.1111/j.1365-313X.2009.04101.x
qShB6-2	Chr6	8230482	8232132	LOC_Os06g14620	Stripe1	st1	Physiological trait	Source activity	Mutant	Chloroplast development during seedling stage.	10.1104/pp.109.136648
qShB6-2	Chr6	8847702	8848847	LOC_Os06g15620	gibberellin-stimulated protein1	OsGSR1	Physiological trait	Sterility	Knockdown	Dwarfism. Primary root elongation. Leaf angle. Fertility. Brassinosteroid homeostasis. Gibberellin sensitivity.	10.1111/j.1365-313X.2008.03707.x
qShB6-2	Chr6	9263601	9265449	LOC_Os06g16270	HSF binding protein 2	OsHSBP2	Resistance or Tolerance	Other stress resistance	Knockdown Overexpression	Heat shock tolerance.	10.1093/jxb/ers245
qShB6-2	Chr6	9336359	9338643	LOC_Os06g16370	heading date 1	Hd1	Physiological trait	Flowering	Natural variation	Flowering time.	10.1105/tpc.12.12.2473
qShB6-2	Chr6	10387509	10390465	LOC_Os06g17900	Pi9	Pi9	Resistance or Tolerance	Blast resistance	Natural variation	Resistance to Magnaporthe grisea.	10.1534/genetics.105.044891
qShB6-2	Chr6	12680638	12681851	LOC_Os06g21920	OsPHT1;9	OsPT9	Physiological trait	Culm leaf	Knockdown Overexpression	&quot;Pi uptake, Pi translocation&quot;	10.1111/pce.12224
qShB6-2	Chr6	12691975	12694849	LOC_Os06g21950	OsPHT1;10	OsPT10	Physiological trait	Culm leaf	Knockdown Overexpression	&quot;Pi uptake, Pi translocation&quot;	10.1111/pce.12224
qShB6-2	Chr6	13055162	13058027	LOC_Os06g22460	Pid3	Pid3	Resistance or Tolerance	Blast resistance	Natural variation	Resistance to Magnaporthe oryzae.	10.1534/genetics.109.102871
qShB6-2	Chr6	14078258	14082303	LOC_Os06g24070	Golden2-like 1	OsGLK1	Physiological trait	Source activity	Overexpression	Chloroplast development.	10.1093/pcp/pcp138
qShB6-2	Chr6	14526887	14532030	LOC_Os06g24730	non-yellow coloring 3	nyc3	Physiological trait	Source activity	Mutant	Leaf senescence. Chlorophyll degradation.	10.1111/j.1365-313X.2009.03919.x
