# Supplementary material for: Identification of Novel QTL Conferring Sheath Blight Resistance in Two Weedy Rice Mapping Populations
Source: Rice (N Y). 2020 Mar 23;13:21. doi: 10.1186/s12284-020-00381-9 (PMC7090113; doi:10.1186/s12284-020-00381-9)
Supplement: Supplementary file 2 — Additional file 2: Table S2. Phenotyping data for the B population including ShB susceptibility in 2015 and 2016, PH in 2012, and HD in 2012. (CSV 4 kb) [file 12284_2020_381_MOESM2_ESM.csv]

W	W218	W219	W211	W212	W213	W215	W216	W217	W188	W189	W180	W182	W184	W185	W186	W187	W68	W69	W62	W63	W60	W61	W66	W67	W64	W175	W174	W177	W176	W171	W173	W179	W97	W96	W93	W92	W90	W202	W201	W207	W205	W204	W198	W251	W193	W192	W190	W197	W196
BH_fungus_pheno	3	5.7	2.2	3.2	5.7	3.2	3.8	3.5	5.5	4.5	3.2	4.2	2.3	5.7	4	2.3	4	5.8	3.8	5.3	4.7	3.8	4.7	4.2	6.5	6	4.3	3.5	3.8	3.8	3.8	7.3	2.7	5.3	3.2	3	6.5	3	2.5	3.8	5.3	6.5	6.5	4.3	2.7	3.5	4.5	3.2	2.3
W_Plant_height-2012-sin9xrr20_	119.5	no	137.2	125.2	70.9	81.7	129.2	119.8	79.1	72.4	86.6	72.3	97.9	82	102.8	130.1	124.3	99.9	85.9	86.9	93.8	127.7	82	121	83.9	80.1	98.2	108.6	140.6	127.1	94.5	82	124.9	115.5	116.1	129.8	84.1	92.3	139.5	100.2	90.1	90.2	71.3	107.6	119.5	110.9	81.3	132.4	74.9
W_heading_date-2012-sin9xrr20_	95.4	no	82.7	99.7	80.7	88.3	91	90.1	84.9	85.8	79	92.8	100.8	85.9	87.4	82.3	75.2	86.5	97.2	74.8	78.6	81.3	88.7	77.6	83.4	82	78.1	83.9	80.2	91.6	83.6	82.3	93.7	82.6	83.8	79.8	79.6	90.7	93.8	78.2	82	85.1	70.5	98.4	80.3	94.4	86.4	80.4	93.8
[truncated: 173 more columns]
