# Supplementary material for: Identification of Novel QTL Conferring Sheath Blight Resistance in Two Weedy Rice Mapping Populations
Source: Rice (N Y). 2020 Mar 23;13:21. doi: 10.1186/s12284-020-00381-9 (PMC7090113; doi:10.1186/s12284-020-00381-9)
Supplement: Supplementary file 3 — Additional file 3: Table S3. Phenotyping data for the S population including ShB susceptibility in 2015 and 2016, PH in 2012, and HD in 2012. (CSV 3 kb) [file 12284_2020_381_MOESM3_ESM.csv]

Y	Y81	Y90	Y86	Y85	Y87	Y28	Y29	Y84	Y20	Y23	Y24	Y25	Y27	Y120	Y122	Y123	Y124	Y125	Y126	Y127	Y128	Y95	Y94	Y97	Y96	Y19	Y18	Y15	Y17	Y16	Y11	Y12	Y133	Y132	Y130	Y91	Y136	Y135	Y134	Y139	Y138	Y99	Y98	Y80	Y88	Y89	Y108	Y109	Y106
SH_fungus_pheno	6	7	2.8	3.2	4.8	2	3.2	4.5	2.7	3	2.3	6	3	2.3	3.3	3.8	4.8	3	3	2	2.8	2.2	2.5	4	5.3	6	2.7	7.7	5.3	3.3	6.8	6.8	2.5	7.2	3.7	2.5	2.3	1.7	2.7	3	2.2	2.7	2.7	2.7	2.2	2.2	1.8	1.8	8
Y_plant_height-2012-sin9xrr9_	75.4	67.3	102.6	113.2	78.6	117.1	131.5	73.6	103.3	114.4	115.6	74.4	123.4	115.4	106.4	103.3	74.8	122.9	122.4	115.7	102.1	112.9	114.4	78.5	78.8	65.2	125	75.1	71.7	119.2	72.6	76.1	102.5	64.9	71.4	115.1	115	119.1	112.1	111.5	79.3	129.9	110	107.8	119.1	129	123	97.9	74.1
Y_heading_date-2012-sin9xrr9_	82	79.3	80	81.3	83.7	81.3	83	80	95.7	80	83.7	85	84.3	79.3	70	68.3	85.3	81	82	72	66	83	84.3	84.7	83.7	85.7	84.3	78.7	90	90	81.7	79.3	55.3	81.3	90	75.7	77.7	87.7	79	87.3	81.7	77.7	88.7	83.7	79.3	81.7	78	56.7	59.7
[truncated: 121 more columns]
