# Supplementary material for: Identification of Novel QTL Conferring Sheath Blight Resistance in Two Weedy Rice Mapping Populations
Source: Rice (N Y). 2020 Mar 23;13:21. doi: 10.1186/s12284-020-00381-9 (PMC7090113; doi:10.1186/s12284-020-00381-9)
Supplement: Supplementary file 4 — Additional file 4: Table S4. The genotypes of the top 10% most resistant RILs in the 2015 season at each of our putative QTL. [file 12284_2020_381_MOESM4_ESM.xlsx]

## Sheet: W_top_marker_geno
B population
	marker	W120	W158	W211	W18	W104	W184	W187	W196	W37	W102	W117	W255	W25	W155	W229	W201	W19	W231	W235	W232	W220	W131	Count of BHA parent alleles	Count of DGWG parent alleles
	S1_7296380	B	B	B	A	A	B	B	B	B	A	A	B	B	B	A	A	A	B	B	B	B	B	15	7
	S1_37885794	B	A	B	N	B	A	B	A	B	A	N	B	A	H	B	H	B	N	B	A	A	B	10	7
	S3_32251963	A	A	B	B	B	A	A	A	A	A	B	A	B	A	A	B	B	A	A	A	B	A	8	14
	S4_22233842	B	B	B	B	A	B	B	B	A	B	B	A	H	A	B	B	A	A	A	B	A	B	13	8
	S6_2472895	A	A	B	B	A	B	A	B	B	A	B	B	A	B	B	A	B	B	A	A	A	B	12	10
	S8_4329148	B	A	B	A	B	B	A	B	A	A	A	B	B	A	B	B	B	B	B	B	B	B	15	7
S population
	marker	Y135	Y108	Y109	Y102	Y69	Y56	Y157	Y82	Y3	Y28	Y127	Y192	Y163	Y143	Y95	Y138	Y88	Count of SH parent alleles	Count of DGWG parent alleles
	S1_21632493	B	B	B	B	B	B	A	A	B	B	B	A	A	B	B	B	B	13	4
	S1_36954707	B	B	B	B	B	B	A	A	B	B	B	B	A	A	B	A	B	12	5
	S6_9257770	A	A	B	B	A	B	B	A	A	B	A	A	A	A	A	B	A	6	11
