# Supplementary material for: Identification of Novel QTL Conferring Sheath Blight Resistance in Two Weedy Rice Mapping Populations
Source: Rice (N Y). 2020 Mar 23;13:21. doi: 10.1186/s12284-020-00381-9 (PMC7090113; doi:10.1186/s12284-020-00381-9)
Supplement: Supplementary file 6 — Additional file 6: Table S6. Genotyping data of RILs in the S population generated using genotyping-by-sequencing in the F5 generation. (CSV 1736 kb) [file 12284_2020_381_MOESM6_ESM.csv]

Y			Y1	Y100	Y101	Y102	Y103	Y104	Y105	Y106	Y107	Y108	Y109	Y11	Y110	Y111	Y112	Y113	Y115	Y116	Y118	Y119	Y12	Y120	Y122	Y123	Y124	Y125	Y126	Y127	Y128	Y130	Y132	Y133	Y134	Y135	Y136	Y138	Y139	Y140	Y141	Y142	Y143	Y144	Y145	Y146	Y147	Y148	Y149
S1_197811	1	0.88	B	A	B	A	A	B	B	A	B	A	B	B	A	B	B	A	A	B	B	B	B	B	A	B	A	A	B	B	B	B	B	B	B	B	B	A	A	B	B	A	B	A	A	A	B	A	B
S1_205765	1	0.9	B	A	B	A	A	B	B	A	B	A	B	B	A	B	B	A	A	B	B	B	B	B	A	B	A	A	B	B	B	B	B	B	B	B	B	A	A	B	B	A	B	A	A	A	B	A	B
S1_212589	1	0.92	B	A	B	A	A	N	B	A	B	A	B	B	A	B	B	A	A	B	B	B	B	B	A	B	A	A	B	B	B	B	B	B	B	B	B	A	A	B	B	A	B	A	A	A	B	A	B
S1_242949	1	0.97	B	A	B	A	A	B	B	A	B	A	B	B	A	B	B	A	A	B	B	B	B	B	A	B	A	A	B	B	B	B	B	B	B	B	B	A	A	B	B	A	B	A	A	A	B	A	B
S1_252897	1	0.99	B	A	B	A	A	B	B	A	B	A	B	B	A	B	B	A	A	B	B	B	B	B	A	B	A	A	B	B	B	B	B	B	B	B	B	A	A	B	B	A	B	A	A	A	B	A	B
S1_271104	1	1.02	B	A	B	A	A	B	B	A	B	A	B	B	A	B	B	A	A	B	B	B	B	B	A	B	A	A	B	B	B	B	B	B	B	B	B	A	A	B	B	A	B	A	A	A	B	A	B
S1_271107	1	1.02001	B	A	B	A	A	B	B	A	B	A	B	B	A	B	B	A	A	B	B	B	B	B	A	B	A	A	B	B	B	B	B	B	B	B	B	A	A	B	B	A	B	A	A	A	B	A	B
S1_271108	1	1.02002	B	A	B	A	A	B	B	A	B	A	B	B	A	B	B	A	A	B	B	B	B	B	A	B	A	A	B	B	B	B	B	B	B	B	B	A	A	B	B	A	B	A	A	A	B	A	B
S1_318555	1	1.11	B	A	B	A	A	B	B	A	B	A	B	B	A	B	B	A	A	B	B	B	B	B	A	B	A	A	B	B	B	B	B	B	B	B	B	A	A	B	B	A	B	A	A	A	B	A	B
S1_323639	1	1.11001	B	A	B	A	A	B	B	A	B	A	B	B	A	B	B	A	A	B	B	B	B	B	A	B	A	A	B	B	B	B	B	B	B	B	B	A	A	B	B	A	B	A	A	A	B	A	B
S1_332832	1	1.12	B	A	B	A	A	B	B	A	B	A	B	B	A	B	B	A	A	B	B	B	B	B	A	B	A	A	B	B	B	B	B	B	B	B	B	A	A	B	B	A	B	A	A	A	B	A	B
S1_333072	1	1.12001	B	A	B	A	A	B	B	A	B	A	B	B	A	B	B	A	A	B	B	B	B	B	A	B	A	A	B	B	B	B	B	B	B	B	B	A	A	B	B	A	B	A	A	A	B	A	B
S1_333074	1	1.12002	B	A	B	A	A	B	B	A	B	A	B	B	A	B	B	A	A	B	B	B	B	B	A	B	A	A	B	B	B	B	B	B	B	B	B	A	A	B	B	A	B	A	A	A	B	A	B
S1_333075	1	1.12003	B	A	B	A	A	B	B	A	B	A	B	B	A	B	B	A	A	B	B	B	B	B	A	B	A	A	B	B	B	B	B	B	B	B	B	A	A	B	B	A	B	A	A	A	B	A	B
S1_352040	1	1.16	B	A	B	A	A	B	B	A	B	A	B	B	A	B	B	A	A	B	B	B	B	B	A	B	A	A	B	B	B	B	B	B	B	B	B	A	A	B	B	A	B	A	A	A	B	A	B
S1_361342	1	1.18	B	A	B	A	A	B	B	A	B	A	B	B	A	B	B	A	A	B	B	B	B	B	A	B	A	A	B	B	B	B	B	B	B	B	B	A	A	B	B	A	B	A	A	A	B	A	B
S1_409945	1	1.23	B	A	B	A	A	B	B	A	B	A	B	B	A	B	B	A	A	B	B	B	B	B	A	B	A	A	B	B	B	B	B	B	B	B	B	A	A	B	B	A	B	A	A	A	B	A	B
S1_423109	1	1.24	B	A	B	A	A	B	B	A	B	A	B	B	A	B	B	A	A	B	B	B	B	B	A	B	A	A	B	B	B	B	B	B	B	B	B	A	A	B	B	A	B	A	A	A	B	A	B
S1_429823	1	1.25	B	A	B	A	A	B	B	A	B	A	B	B	A	B	B	A	A	B	B	B	B	B	A	B	A	A	B	B	B	B	B	B	B	B	B	A	A	B	B	A	B	A	A	A	B	A	B
S1_429826	1	1.25001	B	A	B	A	A	B	B	A	B	A	B	B	A	B	B	A	A	B	B	B	B	B	A	B	A	A	B	B	B	B	B	B	B	B	B	A	A	B	B	A	B	A	A	A	B	A	B
S1_429827	1	1.25002	B	A	B	A	A	B	B	A	B	A	B	B	A	B	B	A	A	B	B	B	B	B	A	B	A	A	B	B	B	B	B	B	B	B	B	A	A	B	B	A	B	A	A	A	B	A	B
S1_453525	1	1.28	B	A	B	A	A	B	B	A	B	A	B	B	A	B	B	A	A	B	B	B	B	B	A	B	A	A	B	B	B	B	B	B	B	B	B	A	A	B	B	A	B	A	A	A	B	A	B
S1_453534	1	1.28001	B	A	B	A	A	B	B	A	B	A	B	B	A	B	B	A	A	B	B	B	B	B	A	B	A	A	B	B	B	B	B	B	B	B	B	A	A	B	B	A	B	A	A	A	B	A	B
S1_453565	1	1.28002	B	A	B	A	A	B	B	A	B	A	B	B	A	B	B	A	A	B	B	B	B	B	A	B	A	A	B	B	B	B	B	B	B	B	B	A	A	B	B	A	B	A	A	A	B	A	B
S1_478633	1	1.3	B	A	B	A	A	B	B	A	B	A	B	B	A	B	B	A	A	B	B	B	B	B	A	B	A	A	B	B	B	B	B	B	B	B	B	A	A	B	B	A	B	A	A	A	B	A	B
S1_480519	1	1.30001	B	A	B	A	A	B	B	A	B	A	B	B	A	B	B	A	A	B	B	B	B	B	A	B	A	A	B	B	B	B	B	B	B	B	B	A	A	B	B	A	B	A	A	A	B	A	B
S1_485081	1	1.31	B	A	B	A	A	B	B	A	B	A	B	B	A	B	B	A	A	B	B	B	B	B	A	B	A	A	B	B	B	B	B	B	B	B	B	A	A	B	B	A	B	A	A	A	B	A	B
S1_494825	1	1.32	B	A	B	A	A	B	B	A	B	A	B	B	A	B	B	A	A	B	B	B	B	B	A	B	A	A	B	H	B	B	B	B	B	B	B	A	A	B	B	A	B	A	A	A	B	A	B
S1_498819	1	1.33	B	A	B	A	A	B	B	A	B	A	B	B	A	B	B	A	A	B	B	B	B	B	A	B	A	A	B	B	B	B	B	B	B	B	B	A	A	B	B	A	B	A	A	A	B	A	B
S1_498834	1	1.33001	B	A	B	A	A	B	B	A	B	A	B	B	A	B	B	A	A	B	B	B	B	B	A	B	A	A	B	B	B	B	B	B	B	B	B	A	A	B	B	A	B	A	A	A	B	A	B
S1_514369	1	1.34	B	A	B	A	A	B	B	A	B	A	B	B	A	B	B	A	A	B	B	B	B	B	A	B	A	A	B	B	B	B	B	B	B	B	B	A	A	B	B	A	B	A	A	A	B	A	B
S1_514565	1	1.34001	B	A	B	A	A	B	B	A	N	A	B	B	A	B	B	A	A	B	B	B	B	B	A	B	A	A	B	B	B	B	B	B	B	B	B	A	A	B	B	A	B	A	A	A	B	A	B
S1_537855	1	1.37	B	A	B	A	A	B	B	A	B	A	B	B	A	B	B	A	A	B	B	B	B	B	A	B	A	A	B	B	B	B	B	B	B	B	B	A	A	B	B	A	B	A	A	A	B	A	B
S1_557663	1	1.39	N	A	B	A	A	B	B	A	B	A	B	B	A	B	B	A	A	B	N	B	B	B	A	B	A	A	B	B	B	B	B	B	B	B	B	A	A	B	B	A	B	A	A	A	B	A	B
S1_562397	1	1.4	B	A	B	A	A	B	B	A	B	A	B	B	A	B	B	A	A	B	B	B	B	B	A	B	A	A	B	B	B	B	B	B	B	B	B	A	A	B	B	A	B	A	A	A	B	A	B
S1_578767	1	1.42	B	A	B	A	A	B	B	A	B	A	B	B	A	B	B	A	A	B	B	B	B	B	A	B	A	A	B	B	B	B	B	B	B	B	B	N	A	B	B	A	B	A	A	A	B	A	B
S1_579264	1	1.42001	B	A	B	A	A	B	B	A	B	A	B	B	A	B	B	A	A	B	B	B	B	B	A	B	A	A	B	B	B	B	B	B	B	B	B	A	A	B	B	A	B	A	A	A	B	A	B
S1_580825	1	1.42002	B	A	B	A	A	B	B	A	B	A	B	B	A	B	B	A	A	B	B	B	B	B	A	B	A	A	B	B	B	B	B	B	B	B	B	A	A	B	B	A	B	A	A	A	B	A	B
S1_580866	1	1.42003	B	A	B	A	A	B	B	A	B	A	B	B	A	B	B	A	A	B	B	B	B	B	A	B	A	A	B	B	B	B	B	B	B	B	B	A	A	B	B	A	B	A	A	A	B	A	B
S1_582025	1	1.42004	B	A	B	A	A	B	B	A	B	A	B	B	A	B	B	A	A	B	B	B	B	B	A	B	A	A	B	B	B	B	B	B	B	B	B	A	A	B	B	A	B	A	A	A	B	A	B
S1_604746	1	1.57	B	A	B	A	A	B	B	A	B	A	B	B	A	B	B	A	A	B	B	B	B	B	A	B	A	A	B	B	B	B	B	B	B	B	B	A	A	B	B	A	B	A	A	A	B	A	B
S1_604749	1	1.57001	B	A	B	A	A	B	B	A	B	A	B	B	A	B	B	A	A	B	B	B	B	B	A	B	A	A	B	B	B	B	B	B	B	B	B	A	A	B	B	A	B	A	A	A	B	A	B
S1_605298	1	1.57002	B	A	B	A	A	B	B	A	B	A	B	B	A	B	B	A	A	B	B	B	B	B	A	B	A	A	B	B	B	B	B	B	B	B	B	A	A	B	B	A	B	A	A	A	B	A	B
S1_621638	1	1.71	B	A	B	A	A	B	B	A	B	A	B	B	A	B	B	A	A	B	B	B	B	B	A	B	A	A	B	B	B	B	B	B	B	B	B	A	A	B	B	A	B	A	A	A	B	A	B
S1_628091	1	1.83	B	A	B	A	A	B	B	A	B	A	B	B	A	B	B	A	A	B	B	B	B	B	A	B	A	A	B	B	B	B	B	B	B	B	B	A	A	B	B	A	B	A	A	A	B	A	B
S1_658059	1	2.57	B	A	B	A	A	B	B	A	B	A	N	B	A	B	B	A	A	B	B	B	B	B	A	B	A	A	B	B	B	B	B	B	B	B	B	A	A	B	B	A	B	A	A	A	B	A	B
S1_729480	1	2.83	B	A	B	A	A	B	B	A	B	A	B	B	A	B	B	A	A	B	B	B	B	B	A	B	A	A	B	B	B	B	B	B	B	B	B	A	A	B	B	A	B	A	A	A	B	A	B
S1_729613	1	2.83001	B	A	B	N	A	B	B	A	B	A	N	B	A	B	B	A	A	B	B	B	B	B	A	B	A	A	B	B	B	B	B	B	N	B	B	A	A	B	B	A	B	A	A	A	N	A	B
S1_737438	1	2.83002	B	A	B	A	A	B	B	A	B	A	B	B	A	B	B	A	A	B	B	B	B	B	A	B	A	A	B	B	B	B	B	B	B	B	B	A	A	B	B	A	B	A	A	A	B	A	B
S1_737439	1	2.83003	B	A	B	A	A	B	B	A	B	A	B	B	A	B	B	A	A	B	B	B	B	B	A	B	A	A	B	B	B	B	B	B	B	B	B	A	A	B	B	A	B	A	A	A	B	A	B
S1_741575	1	2.84	B	A	B	A	A	B	B	A	B	A	B	B	A	B	B	A	A	B	B	B	B	B	A	B	A	A	B	B	B	B	B	B	B	B	B	A	A	B	B	A	B	A	A	A	B	A	B
S1_749515	1	2.84001	B	A	B	A	A	B	B	A	B	A	B	B	A	B	B	A	A	B	B	B	B	B	A	B	A	A	B	B	B	B	B	B	B	B	B	A	A	B	B	A	B	A	A	A	B	A	B
S1_852454	1	2.93	B	A	B	A	A	B	B	A	B	A	B	B	A	B	B	A	A	B	B	B	B	B	A	B	A	A	B	B	B	B	B	B	B	B	B	A	A	B	B	A	B	A	A	A	B	A	B
S1_852462	1	2.93001	B	A	B	A	A	B	B	A	B	A	B	B	A	B	B	A	A	B	B	B	B	B	A	B	A	A	B	B	B	B	B	B	B	B	B	A	A	B	B	A	B	A	A	A	B	A	B
S1_852475	1	2.93002	B	A	B	A	A	B	B	A	B	A	B	B	A	B	B	A	A	B	B	B	B	B	A	B	A	A	B	B	B	B	B	B	B	B	B	A	A	B	B	A	B	A	A	A	B	A	B
S1_924471	1	3.06	B	A	B	A	A	B	B	A	B	A	B	B	N	B	B	A	A	B	B	B	B	B	A	B	A	A	B	B	B	B	B	B	B	B	B	A	A	B	B	A	B	A	A	A	B	A	B
S1_924618	1	3.06001	B	A	N	A	A	B	B	A	B	A	B	B	A	B	B	A	A	B	B	N	B	B	A	B	A	A	B	B	B	B	B	B	B	B	B	A	A	B	B	A	B	A	A	A	B	A	B
S1_1020373	1	3.08	B	A	B	A	A	B	B	A	B	A	B	B	A	B	B	A	A	B	B	B	B	B	A	B	A	A	B	B	B	B	B	B	B	B	B	A	A	B	B	A	B	A	A	A	B	A	B
S1_1067113	1	3.39	B	A	B	A	A	B	B	A	B	A	B	B	A	B	B	A	A	B	B	B	B	B	A	B	A	A	B	B	B	B	B	B	B	B	B	A	A	B	B	A	B	A	A	A	B	A	B
S1_1067116	1	3.39001	B	A	B	A	A	B	B	A	B	A	B	B	A	B	B	A	A	B	B	B	B	B	A	B	A	A	B	B	B	B	B	B	B	B	B	A	A	B	B	A	B	A	A	A	B	A	B
S1_1074206	1	3.44	B	A	B	A	A	B	B	A	B	A	B	B	A	B	B	A	A	B	B	B	B	B	A	B	A	A	B	B	B	B	B	B	B	B	B	A	A	B	B	A	B	A	A	A	B	A	B
S1_1103930	1	3.97	B	A	B	A	A	B	B	A	B	A	B	B	A	B	B	A	A	B	B	B	B	B	A	B	A	A	B	B	B	B	B	B	B	B	B	A	A	B	B	A	B	A	A	A	B	A	B
S1_1122806	1	4.31	B	A	B	A	A	B	B	A	B	A	B	B	A	B	B	A	A	B	B	B	B	B	A	B	A	A	B	B	B	B	B	B	B	B	B	A	A	B	B	A	B	A	A	A	B	A	B
S1_1143800	1	4.69	B	A	B	A	A	B	B	A	B	A	B	B	A	B	B	A	A	B	B	B	B	B	A	B	A	A	B	B	B	B	B	B	B	B	B	A	A	B	B	A	B	A	A	A	B	A	B
S1_1402732	1	9.02	B	A	B	A	A	B	B	A	B	A	B	B	A	B	B	A	A	B	B	B	B	B	A	B	A	A	B	B	A	B	B	B	B	B	B	A	A	B	B	A	B	A	A	A	B	A	B
S1_1518465	1	9.8	N	A	B	A	A	B	B	A	B	A	B	B	A	B	B	A	A	B	B	B	B	B	A	B	A	A	B	B	A	N	B	B	B	B	B	A	A	B	B	A	B	A	A	A	B	A	B
S1_1518482	1	9.80001	N	A	B	A	A	B	B	A	B	A	B	B	A	N	B	A	A	B	B	B	B	B	A	B	A	A	B	B	A	B	B	B	B	B	B	A	H	B	B	A	B	A	H	A	B	A	B
S1_1570864	1	9.93	B	A	B	A	A	B	B	A	B	A	B	A	H	B	B	A	A	B	B	B	B	B	A	B	A	A	B	B	A	B	B	B	B	B	B	A	A	B	B	A	B	A	A	A	B	A	B
S1_2109453	1	12.21	B	A	B	A	A	B	B	A	B	A	B	A	B	B	B	A	A	B	B	B	B	B	A	B	A	A	B	B	A	B	B	B	B	B	B	A	A	B	B	A	B	A	A	A	B	A	B
S1_2109491	1	12.21001	B	A	B	N	A	B	B	A	B	A	B	A	B	B	N	A	A	B	N	N	B	N	A	B	A	A	B	B	A	B	B	B	N	B	B	A	A	B	B	A	B	A	A	A	B	A	N
S1_2121574	1	12.32	B	A	B	A	A	B	B	A	B	A	B	A	B	B	B	A	A	B	B	B	B	B	A	B	A	A	B	B	A	B	B	B	B	B	B	A	A	B	B	A	B	A	A	A	B	A	B
S1_2121587	1	12.32001	B	A	B	A	A	B	B	A	B	A	B	A	B	B	B	A	A	B	B	B	B	B	A	B	A	A	B	B	A	B	B	B	B	B	B	A	A	B	B	A	B	A	A	A	B	A	B
S1_2121641	1	12.32002	B	A	B	A	A	H	B	A	B	A	B	A	B	B	B	A	A	B	B	B	B	B	A	B	A	A	B	B	A	B	B	B	B	B	B	A	A	B	B	A	B	A	A	N	B	A	B
S1_2121772	1	12.32003	B	A	B	A	A	B	B	A	B	A	B	A	B	B	B	A	A	B	B	B	B	B	A	B	A	A	B	B	A	B	B	B	B	B	B	A	A	B	B	A	B	A	A	A	B	A	B
S1_2122019	1	12.32004	B	A	B	A	A	B	B	A	B	A	B	A	B	B	B	A	A	B	B	B	B	B	A	B	A	A	B	B	A	B	B	B	B	B	B	A	A	B	B	A	B	A	A	A	B	A	B
S1_2122036	1	12.32005	B	A	B	A	A	B	B	A	B	A	B	A	B	B	B	A	A	B	B	B	B	B	A	B	A	A	B	B	A	B	B	B	B	B	B	A	A	B	B	A	B	A	A	A	B	A	B
S1_2159142	1	12.88	B	A	B	A	A	B	B	A	B	A	B	A	B	B	B	A	A	B	B	B	B	B	A	B	A	A	B	B	A	B	B	B	B	B	N	A	A	B	B	A	B	A	A	A	B	A	B
S1_2169068	1	13.22	B	A	B	A	A	B	B	A	B	A	B	A	B	B	B	A	A	B	B	B	B	B	A	B	A	A	B	B	A	B	B	B	B	B	B	A	A	B	B	A	B	A	A	A	B	A	B
S1_2169154	1	13.22001	B	A	B	A	A	B	B	A	B	A	B	A	B	B	B	A	A	B	B	B	B	B	A	B	A	A	B	B	A	B	B	B	B	B	B	A	A	B	B	A	B	A	A	A	B	A	B
S1_2169155	1	13.22002	B	A	B	A	A	B	B	A	B	A	B	A	B	B	B	A	A	B	B	B	B	B	A	B	A	A	B	B	A	B	B	B	B	B	B	A	A	B	B	A	B	A	A	A	B	A	B
S1_2224825	1	14.02	B	A	B	A	A	B	B	A	B	A	B	A	B	B	B	A	A	B	B	B	B	B	A	B	A	A	B	B	A	B	B	B	B	B	B	A	A	B	B	A	B	A	A	A	B	A	B
S1_2373999	1	15.63	B	A	B	A	A	B	B	B	B	A	B	A	B	B	B	A	A	B	B	B	B	B	A	A	A	A	B	B	A	B	B	B	B	B	B	A	A	B	B	A	B	A	A	A	B	A	B
S1_2585350	1	16.31	B	A	B	A	A	B	B	B	B	A	B	A	B	B	B	A	A	B	B	B	B	B	A	A	A	A	B	B	A	B	B	B	B	B	B	A	A	B	B	A	B	A	A	A	B	A	B
S1_2619281	1	16.4	B	A	B	A	A	B	B	B	B	A	B	A	B	B	B	A	A	B	B	B	B	B	A	A	A	A	B	B	A	B	B	B	B	B	B	A	A	B	B	A	B	A	A	A	B	A	B
S1_2691671	1	16.55	B	A	B	A	A	B	B	B	B	A	B	A	B	B	B	A	A	B	B	B	B	B	A	A	A	A	B	B	A	B	B	B	B	B	B	A	A	B	B	A	B	A	A	A	B	A	B
S1_2703390	1	16.58	B	A	B	A	A	B	N	B	B	A	B	A	B	B	B	A	N	B	B	B	B	B	A	A	A	A	B	B	N	B	B	B	B	B	B	A	N	B	B	A	B	A	A	A	B	A	B
S1_2722415	1	16.62	B	A	B	A	A	B	B	B	B	A	B	A	B	B	B	A	A	B	B	B	B	B	A	A	A	A	B	B	A	B	B	B	B	B	B	A	A	B	B	A	B	A	A	A	B	A	B
S1_3435464	1	17.64	B	A	B	A	A	B	B	B	B	A	B	A	B	A	A	A	A	B	B	B	B	B	A	A	A	A	A	B	B	B	B	B	B	B	B	A	A	B	B	A	B	A	A	A	B	A	B
S1_3435502	1	17.64001	B	A	B	A	A	B	B	B	B	A	B	A	B	A	A	A	A	B	B	B	B	B	A	A	A	A	A	B	B	B	B	B	B	B	B	A	A	B	B	A	B	A	A	A	B	A	B
S1_3536384	1	17.97	B	A	B	A	A	B	B	B	B	A	B	A	B	A	A	A	A	B	B	A	B	B	A	A	A	A	A	B	B	B	B	B	B	B	B	A	A	B	B	A	B	A	A	A	B	A	B
S1_3652877	1	19.25	B	A	B	A	A	B	B	B	B	A	B	A	A	A	A	A	A	B	B	A	B	B	A	A	A	A	A	B	B	B	B	B	B	B	B	A	A	A	B	A	A	A	A	A	B	A	B
S1_3680726	1	19.36001	B	A	B	A	A	B	B	B	B	A	B	A	A	A	A	A	A	B	B	A	B	B	A	A	A	A	A	B	B	B	B	B	B	B	B	A	A	A	B	A	A	A	A	A	B	A	B
S1_3680727	1	19.36002	B	A	B	A	A	B	B	B	B	A	B	A	A	A	A	A	A	B	B	A	B	B	A	A	A	A	A	B	B	B	B	B	B	B	B	A	A	A	B	A	A	A	A	A	B	A	B
S1_3680728	1	19.36003	B	A	B	A	A	B	B	B	B	A	B	A	A	A	A	A	A	B	B	A	B	B	A	A	A	A	A	B	B	B	B	B	B	B	B	A	A	A	B	A	A	A	A	A	B	A	B
S1_3688266	1	19.38	B	A	B	A	A	B	B	B	B	A	B	A	A	A	A	A	A	B	B	A	B	B	A	A	A	A	A	B	B	B	B	B	B	B	B	A	A	A	B	A	A	A	A	A	B	A	B
S1_3708932	1	19.49	B	A	B	A	A	B	B	B	B	A	B	A	A	A	A	A	A	B	B	A	B	B	A	A	A	A	H	B	B	B	B	B	B	B	B	A	A	A	B	A	A	A	A	A	B	A	B
S1_3788022	1	19.79	B	A	B	A	A	B	B	B	B	A	B	A	A	A	A	A	A	B	B	A	B	B	A	A	A	A	A	B	B	B	B	B	B	B	B	N	A	A	B	A	A	A	A	A	B	A	B
S1_3797769	1	19.81	B	A	B	A	A	B	B	B	B	A	B	A	A	A	A	A	A	B	B	A	B	B	A	A	A	A	A	B	B	B	B	B	B	B	B	A	A	A	B	A	A	A	A	A	B	A	B
S1_3805184	1	19.82	B	A	B	A	A	N	B	B	B	A	B	A	A	A	A	A	A	B	B	A	B	B	A	A	A	A	A	B	B	B	B	B	B	B	B	A	A	A	B	A	A	A	A	A	B	A	B
S1_3805795	1	19.82001	B	A	B	A	A	B	B	B	B	A	B	A	A	A	A	A	A	B	B	A	B	B	A	A	A	A	A	B	B	B	B	B	B	B	B	A	A	A	B	A	A	A	A	A	B	A	B
S1_3811977	1	19.83	B	A	B	A	A	B	B	B	B	A	B	A	A	A	A	A	A	B	B	A	B	B	A	A	A	A	A	B	B	B	B	B	B	B	B	A	A	A	B	A	A	A	A	A	B	A	B
S1_3820526	1	19.85	B	A	B	A	A	B	B	B	B	A	B	A	A	A	A	A	A	B	B	A	B	B	A	A	A	A	A	B	B	B	B	B	B	B	B	A	A	A	B	A	A	A	A	A	B	A	B
S1_3835241	1	19.87	B	A	B	A	A	B	B	B	B	A	B	A	A	A	A	A	A	B	B	A	B	B	A	A	A	A	A	B	B	B	B	B	B	B	B	A	A	A	B	A	A	A	A	A	B	A	B
S1_3835837	1	19.87001	H	A	B	A	A	H	B	B	B	A	B	A	A	A	A	A	A	B	B	A	B	B	A	A	A	A	A	B	B	B	B	B	B	B	B	A	A	A	B	A	A	A	A	A	B	A	B
S1_3835840	1	19.87002	B	A	B	A	A	B	B	B	B	A	B	A	A	A	A	A	A	B	B	A	B	B	A	A	A	A	A	B	B	B	B	B	B	B	B	A	A	A	B	A	A	A	A	A	B	A	B
S1_3835841	1	19.87003	B	A	B	A	A	B	B	B	B	A	B	A	A	A	A	A	A	B	B	A	B	B	A	A	A	A	A	B	B	B	B	B	B	B	B	A	A	A	B	A	A	A	A	A	B	A	B
S1_3835925	1	19.87004	B	A	B	A	A	B	B	B	B	A	B	A	A	A	A	A	A	B	B	A	B	B	A	A	A	A	A	B	B	B	B	B	B	B	B	A	A	A	B	A	A	A	A	A	B	A	B
S1_3836269	1	19.87005	B	A	B	A	A	B	B	B	B	A	B	A	A	A	A	A	A	B	B	A	B	B	A	A	A	A	A	B	B	B	B	B	B	B	B	A	A	A	B	A	A	A	A	A	B	A	B
S1_3836278	1	19.87006	B	A	B	A	A	B	B	B	B	A	B	A	A	A	A	A	A	B	B	A	B	B	A	A	A	A	A	B	B	B	B	B	B	B	B	A	A	A	B	A	A	A	A	A	B	A	B
S1_3938466	1	20.1	B	A	B	A	A	B	B	B	B	A	B	A	A	A	A	A	A	B	B	A	B	B	A	A	A	A	A	B	B	B	B	B	B	B	B	A	A	A	B	H	A	A	A	A	B	A	B
S1_3958573	1	20.21	B	A	B	A	A	B	B	B	B	A	B	A	A	A	A	A	A	B	B	A	B	B	A	A	A	A	A	B	B	B	B	B	B	B	B	A	A	A	B	A	A	A	A	A	B	A	B
S1_4307004	1	21.92	B	A	B	A	A	B	B	B	B	A	B	B	A	A	A	A	A	B	B	A	B	A	A	A	A	A	A	B	B	B	B	B	B	B	B	A	A	A	B	A	A	A	A	A	B	A	B
S1_4401758	1	22.05	B	A	B	A	A	B	B	B	B	A	B	B	A	A	A	A	A	B	B	A	B	A	A	A	B	A	A	B	B	B	B	B	B	B	B	A	H	A	B	A	A	A	A	A	B	A	B
S1_4421833	1	22.07	B	A	B	A	A	B	B	B	B	A	B	B	A	A	A	A	A	B	B	A	B	A	A	A	B	A	A	B	B	B	B	B	B	B	B	A	H	A	B	A	A	A	A	A	B	A	B
S1_4486055	1	22.15	B	A	B	A	A	B	B	B	B	A	B	B	A	A	A	A	A	B	B	A	B	A	A	A	B	A	A	B	B	B	B	B	B	B	B	A	H	A	B	A	A	A	A	A	B	A	B
S1_4489515	1	22.15001	B	A	B	A	A	B	B	B	B	A	B	B	A	A	A	A	A	B	B	A	B	A	A	A	B	A	A	B	B	B	B	B	B	B	B	A	H	A	B	A	A	A	A	A	B	A	B
S1_4658405	1	23.12	B	A	B	A	A	B	B	B	B	A	B	B	A	A	A	A	A	B	B	A	A	A	A	A	B	A	A	B	B	A	B	B	B	B	B	A	H	A	B	A	A	A	A	B	B	A	B
S1_4695310	1	23.36	B	A	B	A	A	B	B	B	B	A	B	B	A	A	A	A	A	B	B	A	A	A	A	A	B	A	A	B	B	A	B	B	B	B	B	A	H	A	B	A	A	A	A	B	B	A	B
S1_4718203	1	23.51	B	A	B	A	A	B	B	B	B	A	B	B	A	A	A	A	A	B	B	A	A	A	A	A	B	A	A	B	B	A	B	B	B	B	B	A	H	A	B	A	A	A	A	B	B	A	B
S1_4748514	1	23.76	B	A	B	A	A	B	B	B	B	A	B	B	A	A	A	A	A	B	B	A	A	A	A	A	B	A	A	B	B	A	B	B	B	B	B	A	H	A	B	A	A	B	A	B	B	A	B
S1_4884121	1	24.62	B	A	B	A	A	B	B	B	B	A	B	B	A	A	A	A	A	B	B	A	A	A	B	A	B	A	A	B	B	A	B	B	B	B	A	A	H	A	B	A	A	B	A	B	B	A	B
S1_4958939	1	24.95	B	A	B	A	A	B	B	B	B	A	B	B	A	A	A	A	A	B	B	A	A	A	B	A	B	A	A	B	B	A	B	B	B	B	A	A	H	A	B	A	A	B	A	B	B	A	B
S1_5656601	1	33.3	B	A	B	A	A	B	A	B	B	B	B	B	B	B	B	A	A	B	B	A	A	A	B	A	B	B	H	B	B	A	H	A	B	B	A	B	B	A	B	A	A	B	A	B	B	A	B
S1_5705110	1	33.98	B	A	B	A	A	B	A	B	B	B	B	B	B	B	B	A	A	B	B	A	A	A	B	A	B	B	H	B	B	A	H	A	B	B	A	B	B	A	B	A	A	B	A	B	B	A	B
S1_5774227	1	34.23	B	A	B	A	A	B	A	B	B	B	B	B	B	B	B	A	A	B	B	A	A	A	B	A	B	B	H	B	B	A	H	A	B	B	A	B	B	A	B	A	A	B	A	B	B	A	B
S1_5774229	1	34.23001	B	A	B	A	A	B	A	B	B	B	B	B	B	B	B	A	A	B	B	A	A	A	B	A	B	B	H	B	B	A	H	A	B	B	A	B	B	A	B	A	A	B	A	B	B	A	B
S1_5782072	1	34.23002	B	A	B	A	A	B	A	B	B	B	B	B	B	B	B	A	A	B	B	A	A	A	B	A	B	B	H	B	B	A	H	A	B	B	A	H	B	A	B	A	A	B	A	B	B	A	B
S1_5782073	1	34.23003	B	A	B	A	A	B	A	B	B	B	B	B	B	B	B	A	A	B	B	A	A	A	B	A	B	B	H	B	B	A	H	A	B	B	A	H	B	A	B	A	A	B	A	B	B	A	B
S1_5782089	1	34.23004	B	A	B	A	A	B	A	B	B	B	H	B	B	B	B	A	A	B	B	A	A	A	B	A	B	B	H	B	B	A	H	A	B	B	A	B	B	A	B	A	A	B	A	B	B	A	B
S1_5782092	1	34.23005	B	A	B	A	A	B	A	B	B	B	H	B	B	B	B	A	A	B	B	A	A	A	B	A	B	B	H	B	B	A	H	A	B	B	A	B	B	A	B	A	A	B	A	B	B	A	B
S1_5782094	1	34.23006	B	A	B	A	A	B	A	B	B	B	H	B	B	B	B	A	A	B	B	A	A	A	B	A	B	B	H	B	B	A	H	A	B	B	A	B	B	A	B	A	A	B	A	B	B	A	B
S1_5782095	1	34.23007	B	A	B	A	A	B	A	B	B	B	H	B	B	B	B	A	A	B	B	A	A	A	B	A	B	B	H	B	B	A	H	A	B	B	A	B	B	A	B	A	A	B	A	B	B	A	B
S1_5782097	1	34.23008	B	A	B	A	A	B	A	B	B	B	H	B	B	B	B	A	A	B	B	A	A	A	B	A	B	B	H	B	B	A	H	A	B	B	A	B	B	A	B	A	A	B	A	B	B	A	B
S1_5782129	1	34.23009	B	A	B	A	A	B	A	B	B	B	B	B	B	B	B	A	A	B	B	A	A	A	B	A	B	B	H	B	B	A	H	A	B	B	A	B	B	A	B	A	A	B	A	B	B	A	B
S1_5792183	1	34.25001	B	A	B	A	A	B	A	B	B	B	B	B	B	B	B	A	A	B	B	A	A	A	B	A	B	B	H	B	B	A	H	A	B	B	A	B	B	A	B	A	A	B	A	B	B	A	B
S1_5792315	1	34.25002	B	A	B	A	A	B	A	B	B	B	B	B	B	B	B	A	A	B	B	A	A	A	B	A	B	B	H	B	B	A	H	A	B	B	A	B	B	A	B	A	A	B	A	B	B	A	B
S1_5792338	1	34.25004	B	A	B	A	A	B	A	B	B	B	B	B	B	B	B	A	A	B	B	A	A	A	B	A	B	B	H	B	B	A	H	A	B	B	A	B	B	A	B	A	A	B	A	B	B	A	B
S1_5810926	1	34.3	B	A	B	A	A	B	A	B	B	B	B	B	B	B	B	A	A	B	B	A	A	A	B	A	B	B	H	B	B	A	H	A	B	B	A	B	B	A	B	A	A	B	A	B	B	A	B
S1_5824084	1	34.35	N	A	B	A	A	B	A	B	B	N	N	B	B	B	B	A	A	B	B	A	A	A	B	N	B	B	H	N	B	A	H	A	B	B	A	B	B	A	B	A	A	B	A	B	B	A	N
S1_5824085	1	34.35001	N	A	B	A	A	B	A	B	B	N	N	B	B	B	B	A	A	B	B	A	A	A	B	N	B	B	H	N	B	A	H	A	B	B	A	B	B	A	B	A	A	B	A	B	B	A	N
S1_5838058	1	34.37	B	A	B	A	A	B	A	B	B	B	B	B	B	B	B	A	A	B	B	A	A	A	B	A	B	B	H	B	B	A	H	A	B	B	A	B	B	A	B	A	A	B	A	B	B	A	B
S1_5839662	1	34.37001	B	A	B	A	A	B	A	B	B	B	B	B	B	B	B	A	A	B	B	A	A	A	B	A	B	B	H	B	B	A	H	A	B	B	A	B	B	A	B	A	A	B	A	B	B	A	B
S1_5848748	1	34.46	B	A	B	A	A	B	A	B	B	B	B	B	B	B	B	A	A	B	B	A	A	A	B	A	B	B	H	B	B	A	H	A	B	B	A	B	B	A	B	A	A	B	A	B	B	A	B
S1_5857795	1	34.46001	B	A	B	A	A	B	A	B	B	B	B	B	B	B	B	A	A	B	B	A	A	A	B	A	B	B	H	B	B	A	H	A	B	B	A	B	B	N	B	A	A	B	A	B	B	A	B
S1_5867801	1	34.52	B	A	B	A	A	B	A	B	B	B	B	B	B	B	B	A	A	B	B	A	A	A	B	A	B	B	H	B	B	A	H	A	N	B	A	B	B	A	B	A	A	B	A	B	B	A	B
S1_5899486	1	34.59	B	A	B	A	A	B	A	B	B	B	B	B	B	B	B	A	A	B	B	A	A	A	B	A	B	B	H	B	B	A	H	A	B	B	A	B	B	A	B	A	A	B	A	B	B	A	B
S1_5920937	1	34.67	B	A	B	A	A	B	A	B	B	B	B	B	B	B	B	A	A	B	B	A	A	A	B	A	B	B	H	B	B	A	H	A	B	B	A	B	B	A	B	A	A	B	A	B	B	A	B
S1_5972008	1	34.73	B	A	B	A	A	B	A	B	B	B	B	B	B	B	B	A	A	B	B	A	A	A	B	A	B	B	N	B	B	A	H	A	B	B	A	B	B	A	B	A	A	B	N	B	B	A	B
S1_5983898	1	34.74	B	A	B	A	A	B	A	B	B	B	B	B	B	B	B	A	A	B	B	A	A	A	B	A	B	B	H	B	B	A	H	A	B	B	A	B	B	A	B	A	A	B	A	B	B	A	B
S1_5983907	1	34.74001	B	A	B	A	A	B	A	B	B	B	B	B	B	B	B	A	A	B	B	A	A	A	B	A	B	B	H	B	B	A	H	A	B	B	A	B	B	A	B	A	A	B	A	B	B	A	B
S1_5995137	1	34.76	B	A	B	A	A	B	A	B	B	B	B	B	B	B	B	A	A	B	B	A	A	A	B	A	B	B	H	B	B	A	A	A	B	B	A	N	B	A	B	A	A	B	A	B	B	A	B
S1_6011219	1	34.78001	B	A	B	A	A	B	A	B	B	B	B	B	B	B	B	A	A	B	B	A	A	A	B	A	B	B	H	B	B	A	H	A	B	B	A	B	B	A	B	A	A	B	A	B	B	A	B
S1_6037592	1	34.82	B	A	B	A	A	B	A	B	B	B	B	B	B	B	B	A	A	B	B	A	A	A	B	A	B	B	H	B	B	A	H	A	B	B	A	B	B	A	B	A	A	B	A	B	B	A	B
S1_6041413	1	34.82001	B	A	B	A	A	B	A	B	B	B	B	B	B	B	B	A	A	B	B	A	A	A	B	A	B	B	H	B	B	A	H	A	B	B	A	B	B	A	B	A	A	B	A	B	B	A	B
S1_6057366	1	34.85	B	A	B	A	A	B	A	B	B	B	B	B	B	B	B	A	A	B	B	A	A	A	B	A	B	B	B	B	B	A	H	A	B	B	A	B	B	A	B	A	A	B	A	B	B	A	B
S1_6096029	1	34.9	B	A	B	A	A	B	A	B	B	B	B	B	B	B	B	A	A	B	B	A	A	A	B	A	B	B	N	B	B	A	B	A	B	B	A	N	B	A	N	A	A	B	A	B	B	A	B
S1_6101882	1	34.92	B	A	B	A	A	B	A	B	B	B	B	B	B	B	B	A	A	B	B	A	A	A	B	A	B	B	H	B	B	A	H	A	B	B	A	B	B	A	B	A	A	B	A	B	B	A	B
S1_6113108	1	34.94	B	A	B	A	A	B	A	B	B	B	B	B	B	B	B	A	A	B	B	A	A	A	B	A	B	B	H	B	B	A	H	A	B	B	A	B	B	A	B	A	A	B	A	B	B	A	B
S1_6172572	1	35.13	B	A	B	A	A	B	A	B	B	B	B	B	B	B	B	A	A	B	B	A	A	A	B	A	B	B	H	B	B	A	H	A	B	B	A	B	B	A	B	A	A	B	A	B	B	A	B
S1_6183300	1	35.19	B	A	B	A	A	B	A	B	B	B	B	B	B	B	B	A	A	B	B	A	A	A	B	A	B	B	H	B	B	A	H	A	B	B	A	N	B	A	B	A	A	B	A	B	B	A	B
S1_6183979	1	35.19001	B	A	B	A	A	B	N	B	B	B	B	B	B	B	B	A	A	B	B	A	A	A	B	A	B	B	A	B	B	A	B	A	B	B	A	B	B	A	B	A	A	B	A	B	B	A	B
S1_6186026	1	35.19002	B	A	B	A	A	B	A	B	B	B	B	B	B	B	B	A	A	B	B	A	A	A	B	A	B	B	H	B	B	A	H	A	B	B	A	B	B	A	B	A	A	B	A	B	B	A	B
S1_6192614	1	35.29	B	A	B	A	A	B	A	B	B	B	B	B	B	B	B	A	A	B	B	A	A	A	B	A	B	B	H	B	B	A	H	A	B	B	A	B	B	A	B	A	A	B	A	B	B	A	B
S1_6192917	1	35.29001	B	A	B	A	A	B	A	B	B	B	B	B	B	B	B	A	A	B	B	A	A	A	B	A	B	B	H	B	B	A	H	A	B	B	A	B	B	A	B	A	A	B	A	B	B	A	B
S1_6244492	1	35.85	B	A	B	A	A	B	A	B	B	B	B	B	B	B	B	A	A	B	B	A	A	A	B	A	B	B	H	B	B	A	H	A	B	B	A	B	B	A	B	A	A	B	A	B	B	A	B
S1_6330487	1	36.33	B	A	B	A	A	B	A	B	B	B	H	B	B	B	B	A	A	B	B	A	A	A	B	A	B	B	H	B	H	A	H	A	B	B	A	B	B	A	B	A	A	B	A	B	B	A	B
S1_6330494	1	36.33001	B	A	B	A	A	B	A	B	B	B	H	B	B	B	B	A	A	B	B	A	A	A	B	A	B	B	H	B	H	A	H	A	B	B	A	B	B	A	B	A	A	B	A	B	B	A	B
S1_6343254	1	36.35	B	A	B	A	A	B	A	B	B	B	B	B	B	B	B	A	A	B	B	A	A	A	B	A	B	B	H	B	B	A	H	A	B	B	A	B	B	A	B	A	A	B	A	B	B	A	B
S1_6366850	1	36.43	B	A	B	A	A	B	A	B	B	B	B	B	B	B	B	A	A	B	B	A	A	A	B	A	B	B	H	B	B	A	H	A	B	B	A	B	B	A	B	A	A	B	A	B	B	A	B
S1_6386004	1	36.47	B	A	N	A	A	N	A	B	B	B	B	B	B	B	B	A	A	B	B	A	A	A	B	A	B	B	A	B	B	A	H	A	B	B	A	B	B	A	B	A	A	B	A	B	B	A	B
S1_6386008	1	36.47001	B	A	N	A	A	N	A	B	B	B	B	B	B	B	B	A	A	B	B	A	A	A	B	A	B	B	A	B	B	A	H	A	B	B	A	B	B	A	B	A	A	B	A	B	B	A	B
S1_6388120	1	36.47002	B	A	B	A	A	B	A	B	B	B	B	B	B	B	B	A	A	B	N	A	A	A	B	A	B	B	N	B	B	A	H	A	B	B	A	B	B	A	B	A	A	B	N	N	B	A	B
S1_6394418	1	36.47003	B	A	B	A	A	B	A	B	B	B	B	B	B	B	B	A	A	B	B	A	A	A	B	A	B	B	H	B	B	A	H	A	B	B	A	B	B	A	B	A	A	B	A	B	B	A	B
S1_7021704	1	40.12	N	A	B	B	A	B	A	B	B	B	B	B	B	B	B	A	A	B	B	A	A	A	B	A	B	B	A	B	B	A	N	A	B	B	A	B	B	A	B	A	A	B	B	B	B	A	B
S1_7021717	1	40.12001	B	A	B	B	A	B	A	B	B	B	B	B	B	B	B	A	A	B	B	A	A	A	B	A	B	B	A	B	B	A	A	A	B	B	A	B	B	A	B	A	A	B	B	B	B	A	B
S1_7031696	1	40.12002	N	N	B	B	A	B	A	B	B	B	B	B	B	B	B	A	A	B	B	A	A	A	B	A	B	B	A	B	B	A	A	A	B	B	A	B	B	A	B	A	A	B	N	B	B	A	B
S1_7031716	1	40.12003	B	A	B	B	A	B	A	B	B	B	B	B	B	B	B	A	A	B	B	A	A	A	B	A	B	B	A	B	B	A	A	A	B	B	A	B	B	A	B	A	A	B	B	B	B	A	B
S1_7053168	1	40.12004	B	A	B	B	A	B	A	B	B	B	B	B	B	B	B	A	A	B	B	A	A	A	B	A	B	B	A	B	B	A	A	A	N	B	A	B	B	A	B	A	A	B	B	B	B	A	B
S1_7055643	1	40.12005	B	A	B	B	A	B	A	B	B	B	B	B	B	B	B	A	A	B	B	A	A	A	B	A	B	B	A	B	B	A	A	A	B	B	A	B	B	A	B	A	A	B	B	B	B	A	B
S1_7055649	1	40.12006	B	A	B	B	A	B	A	B	B	B	B	B	B	B	B	A	A	B	B	A	A	A	B	A	B	B	A	B	N	A	A	A	B	B	A	B	B	A	B	A	A	B	B	B	B	A	B
S1_7071502	1	40.12007	B	A	B	B	A	B	A	B	B	B	B	B	B	B	B	A	A	B	B	A	A	A	B	A	B	B	A	B	B	A	A	A	B	B	A	B	B	A	B	A	A	B	N	B	B	A	B
S1_7071531	1	40.12008	B	A	B	B	A	B	A	B	B	B	B	B	B	B	B	A	A	B	B	A	A	A	B	A	B	B	A	B	B	A	A	A	B	B	A	B	B	A	B	A	A	B	N	B	B	A	B
S1_7073324	1	40.12009	B	A	B	B	A	B	A	B	B	B	B	B	B	B	B	A	A	B	B	A	A	A	B	A	B	B	A	B	B	A	A	A	B	B	A	B	B	A	B	A	A	B	B	B	B	A	B
S1_7076473	1	40.46	N	A	B	B	A	B	A	N	B	B	B	B	B	B	B	A	A	B	B	A	A	A	B	A	B	B	A	N	B	A	A	A	B	B	A	B	B	A	B	A	A	B	B	B	B	A	B
S1_7093399	1	40.46001	B	A	B	B	A	B	A	B	B	B	B	B	B	B	B	A	A	B	B	A	A	A	B	A	B	B	A	B	B	A	A	A	B	B	A	B	B	A	B	N	A	B	B	B	B	A	B
S1_7093510	1	40.46002	B	A	B	B	A	B	A	B	B	B	B	B	B	B	B	A	A	B	B	A	A	A	B	A	B	B	A	B	B	A	N	A	B	B	A	B	B	A	B	A	A	B	B	B	B	A	B
S1_7093663	1	40.46003	B	A	B	B	A	B	A	B	B	B	B	B	B	B	B	A	A	B	B	A	A	A	B	A	B	B	A	B	B	A	A	A	B	B	A	B	B	A	B	A	A	B	B	B	B	A	B
S1_7100365	1	40.46004	B	A	B	B	A	B	A	B	B	B	B	B	B	B	B	A	A	B	B	A	A	A	B	A	B	B	A	B	B	A	A	A	B	B	A	B	B	A	B	A	A	B	B	B	B	A	B
S1_7105287	1	40.46005	B	A	B	B	A	B	A	B	B	B	B	B	B	B	B	A	A	B	B	A	A	A	B	A	B	B	N	N	B	A	A	A	B	B	A	B	B	A	B	A	A	B	B	B	B	A	B
S1_7105297	1	40.46006	B	A	B	B	A	B	A	B	B	B	B	B	B	B	B	A	A	B	B	A	A	A	B	A	B	B	N	N	B	A	A	A	B	B	A	B	B	A	B	A	A	B	B	B	B	A	B
S1_7105332	1	40.46007	B	A	B	B	A	B	A	B	B	B	B	B	B	B	B	A	A	B	B	A	A	A	B	A	B	B	A	N	B	A	A	A	B	B	A	B	B	A	B	A	A	B	B	B	B	A	B
S1_7105376	1	40.46008	B	A	B	B	A	B	A	B	B	B	B	B	B	B	B	A	A	B	B	A	A	A	B	A	B	B	A	B	B	A	A	A	B	B	A	B	B	A	H	A	A	B	B	B	B	A	B
S1_7105405	1	40.46009	B	A	B	B	A	B	A	B	B	B	B	B	B	B	B	A	A	B	B	A	A	A	B	A	B	B	A	B	B	A	A	A	B	B	A	B	B	A	H	A	A	B	B	B	B	A	B
S1_7105413	1	40.4601	B	A	B	B	A	B	A	B	B	B	B	B	B	B	B	A	A	B	B	A	A	A	B	A	B	B	A	B	B	A	A	A	B	B	A	B	B	A	H	A	A	B	B	B	B	A	B
S1_7106302	1	40.46011	B	A	B	B	A	B	A	B	B	B	B	B	B	B	B	A	A	B	B	A	A	A	B	A	B	B	A	B	B	A	A	A	B	B	A	B	B	A	B	A	A	B	B	B	B	A	B
S1_7107715	1	40.46012	B	A	B	B	A	B	A	B	B	B	B	B	B	B	B	A	A	B	B	A	A	A	B	A	B	B	A	B	B	A	A	A	B	B	A	B	B	A	B	A	A	B	B	B	B	A	B
S1_7136716	1	40.5	B	A	B	B	A	B	A	B	B	B	B	B	B	B	B	A	A	B	B	A	A	A	B	A	B	B	A	B	B	A	A	A	B	B	A	B	B	A	B	A	A	B	B	B	B	A	B
S1_7175042	1	40.62	B	A	B	B	A	B	A	B	B	B	B	B	B	B	B	A	A	B	B	A	A	A	B	A	B	B	A	B	B	A	A	A	B	B	A	B	B	A	B	A	A	B	B	B	B	A	B
S1_7293720	1	41.77	B	A	B	B	A	B	A	B	B	B	B	B	B	B	B	A	A	B	B	A	A	A	B	A	B	B	A	B	B	A	A	A	B	B	A	B	B	A	B	A	A	B	B	B	B	A	B
S1_7296346	1	41.77001	B	A	B	B	A	B	A	B	B	B	B	B	B	B	B	A	A	B	B	A	A	A	B	A	B	B	A	B	B	A	A	A	B	B	A	B	B	A	B	A	A	B	B	B	B	A	B
S1_7296378	1	41.77002	B	A	B	B	A	B	A	B	B	B	B	B	B	B	B	A	A	B	B	A	A	A	B	A	B	B	A	B	B	A	A	A	B	B	A	B	B	A	B	A	A	B	B	B	B	A	B
S1_7296380	1	41.77003	B	A	B	B	A	B	A	B	B	B	B	B	B	B	B	A	A	B	B	A	A	A	B	A	B	B	A	B	B	A	A	A	B	B	A	B	B	A	B	A	A	B	B	B	B	A	B
S1_7309207	1	41.77004	B	A	B	B	A	B	A	B	B	B	B	B	B	B	B	A	A	B	B	A	A	A	B	A	B	B	A	B	B	A	A	A	B	B	A	B	B	A	B	A	A	B	B	B	B	A	B
S1_7342903	1	41.77005	B	A	B	B	A	B	A	B	B	B	B	B	B	B	B	A	A	B	B	A	A	A	B	A	B	B	A	B	B	A	A	A	B	B	A	B	B	A	B	A	A	B	B	B	B	A	B
S1_7344741	1	41.77006	B	A	B	B	A	B	A	B	B	B	B	B	B	B	B	A	A	B	B	A	A	A	B	A	B	B	A	B	B	A	A	A	B	B	A	B	B	A	B	A	A	B	B	B	B	A	B
S1_7344764	1	41.77007	B	A	B	B	A	B	A	B	B	B	B	B	B	B	B	A	A	B	B	A	A	A	B	A	B	B	A	B	B	A	A	A	B	B	A	B	B	A	B	A	A	B	B	B	B	A	B
S1_7344774	1	41.77008	B	A	B	B	A	B	A	B	B	B	B	B	B	B	B	A	A	B	B	A	A	A	B	A	B	B	A	B	B	A	A	A	B	B	A	B	B	A	B	A	A	B	B	B	B	A	B
S1_7344840	1	41.77009	B	A	B	B	A	B	A	B	B	B	B	B	B	B	B	A	A	B	B	A	A	A	B	A	B	B	A	B	B	A	A	A	B	B	A	B	B	A	B	A	A	B	B	B	B	A	B
S1_7344844	1	41.7701	B	A	B	B	A	B	A	B	B	B	B	B	B	B	B	A	A	B	B	A	A	A	B	A	B	B	A	B	B	A	A	A	B	B	A	B	B	A	B	A	A	B	B	B	B	A	B
S1_7344867	1	41.77011	B	A	B	B	A	B	A	B	B	B	B	B	B	B	B	A	A	B	B	A	A	A	B	A	B	B	A	B	B	A	A	A	B	B	A	B	B	A	B	A	A	B	B	B	B	A	B
S1_9001276	1	56.29	B	B	B	A	A	B	A	B	B	B	B	A	B	B	B	B	B	H	B	A	A	A	A	A	B	A	A	B	A	B	A	A	B	B	A	B	B	A	B	A	A	B	B	B	A	B	A
S1_9065879	1	56.33	B	B	B	A	A	B	A	B	B	B	B	A	B	B	B	B	B	H	B	A	A	A	A	A	B	A	A	B	A	B	A	A	B	B	A	B	B	A	B	A	H	B	B	B	A	B	A
S1_9077615	1	56.34	B	B	B	A	A	B	A	B	B	B	B	A	B	B	B	B	B	H	B	A	A	A	A	A	B	A	A	B	A	B	A	A	B	B	A	B	B	A	B	A	A	B	B	B	A	B	A
S1_9198103	1	56.45	B	B	B	A	A	B	A	B	B	A	B	A	B	B	B	B	B	H	B	A	A	A	A	A	A	A	A	B	A	B	A	A	B	B	A	B	B	A	B	A	A	B	B	B	A	B	A
S1_9243663	1	56.45001	N	B	N	A	A	B	A	B	B	A	B	A	B	B	B	B	B	A	B	A	A	A	A	A	A	A	A	B	A	B	A	A	B	B	A	B	B	A	N	A	A	B	N	B	A	B	A
S1_10020167	1	58.68	N	B	A	A	A	B	A	B	N	A	B	A	B	B	B	H	B	H	B	A	A	A	A	A	A	B	A	A	A	B	A	A	B	B	A	B	B	A	B	A	A	B	H	B	A	B	A
S1_10562251	1	61.31	B	B	A	A	A	B	B	B	B	A	B	A	B	B	B	H	B	H	B	A	A	A	A	A	A	B	B	A	A	B	A	A	B	B	A	B	B	A	B	A	B	B	H	B	A	B	A
S1_10947296	1	62.88	B	B	A	A	A	B	B	B	B	A	B	A	B	B	B	H	B	H	B	A	A	A	A	A	A	B	B	A	B	B	A	A	B	B	A	B	A	A	A	A	B	B	H	B	A	B	A
S1_10965485	1	62.99	B	B	A	A	A	B	B	B	B	A	B	A	B	B	B	H	B	H	B	A	A	A	A	A	A	B	B	A	B	B	A	A	B	B	A	B	A	A	A	A	B	B	H	B	A	B	A
S1_11008057	1	63.46	B	B	A	A	A	B	B	B	B	A	B	A	B	B	B	H	B	H	B	A	A	A	A	A	A	B	B	A	B	B	A	A	B	B	A	N	A	A	A	A	B	B	H	B	A	B	A
S1_11008084	1	63.46001	B	B	A	A	A	B	B	B	B	A	B	A	B	B	B	H	B	H	B	A	A	A	A	A	A	B	N	A	B	B	A	A	B	B	A	B	A	A	H	A	B	B	B	B	A	B	A
S1_11112365	1	63.8	B	B	A	A	A	B	B	B	B	A	B	A	B	B	B	H	B	H	B	A	A	A	A	A	A	B	B	A	B	B	A	A	B	B	A	B	A	A	A	A	B	B	H	B	A	B	A
S1_11198097	1	64.15	B	B	A	A	A	B	B	B	B	A	B	A	B	B	B	H	B	H	B	A	A	N	A	A	A	B	B	A	B	B	A	A	B	B	A	B	A	A	A	A	B	B	H	B	A	B	A
S1_11316555	1	64.53	B	B	A	A	A	B	B	B	B	A	B	A	B	B	B	H	B	H	B	A	A	A	A	A	A	B	B	A	B	B	A	A	B	B	A	B	A	A	A	A	B	B	H	B	A	B	A
S1_11350714	1	64.69	B	B	A	A	A	B	B	B	B	A	B	A	N	B	B	H	B	A	B	A	A	A	A	A	A	B	B	A	B	B	A	A	B	B	A	B	A	A	A	A	B	B	B	B	A	B	A
S1_11586166	1	65.36001	N	B	A	A	A	B	B	N	B	A	N	A	B	B	B	H	B	N	B	A	N	A	A	A	A	B	B	A	N	N	A	A	B	B	A	N	A	A	A	A	B	B	B	N	A	B	N
S1_11587525	1	65.38	B	B	A	A	A	B	B	B	B	A	B	A	B	B	B	H	B	H	B	A	A	A	A	A	A	B	B	A	B	B	A	A	B	B	A	B	A	A	A	A	B	B	H	B	A	B	A
S1_11666017	1	65.54	B	B	A	A	A	B	B	B	B	A	B	A	B	B	B	B	B	H	B	A	A	A	A	A	A	B	B	A	B	B	A	A	B	B	A	B	A	A	A	A	B	B	H	B	A	B	A
S1_11735557	1	65.73	B	B	A	A	A	B	B	B	B	A	B	A	B	B	B	H	B	H	B	A	A	A	A	A	A	B	B	A	B	B	A	A	B	B	A	B	A	A	A	A	B	B	H	B	A	B	A
S1_12742169	1	68.9	A	B	B	B	A	B	B	A	B	B	B	A	A	B	B	H	B	B	B	B	A	A	A	B	B	B	B	A	B	B	A	B	B	B	A	B	A	A	A	B	B	B	A	B	A	B	A
S1_12807729	1	69.24	A	B	B	B	A	B	B	A	B	B	B	A	A	B	B	H	B	B	B	B	A	A	A	B	B	B	B	A	B	B	A	B	B	B	A	B	A	A	A	B	B	B	A	B	A	B	A
S1_12809419	1	69.24001	A	B	B	B	A	B	B	A	B	B	B	A	A	B	B	H	B	B	B	B	A	A	A	B	B	B	B	A	B	B	A	B	B	B	A	B	A	A	A	B	B	B	A	B	A	B	A
S1_12870868	1	69.28	A	B	B	B	A	B	B	A	B	B	B	A	A	B	B	H	B	B	B	B	A	A	A	B	B	B	B	A	B	B	A	B	B	B	A	B	A	A	A	B	B	B	A	B	A	B	A
S1_13140455	1	69.56	A	B	B	B	A	B	B	A	B	B	B	A	A	B	B	H	B	B	B	B	A	A	A	B	B	B	B	A	B	B	A	B	B	B	A	B	A	A	A	B	B	A	A	B	A	B	A
S1_13199378	1	69.63	A	B	B	B	A	B	B	A	B	B	B	A	A	B	B	B	B	B	B	B	A	A	N	B	B	B	B	A	B	B	A	B	B	B	A	B	A	A	A	B	B	A	A	B	A	B	A
S1_13323817	1	69.68	N	B	B	B	A	B	B	A	B	B	B	A	A	B	B	H	B	B	B	B	A	A	A	B	B	B	B	A	B	B	A	B	B	B	A	B	A	A	A	B	B	A	A	B	A	B	A
S1_13323818	1	69.68001	N	B	B	B	A	B	B	A	B	B	B	A	A	B	B	H	B	B	B	B	A	A	A	B	B	B	B	A	B	B	A	B	B	B	A	B	A	A	A	B	B	A	A	B	A	B	A
S1_13323823	1	69.68002	N	B	B	B	A	B	B	A	B	B	B	A	A	B	B	H	B	B	B	B	A	A	A	B	B	B	B	A	B	B	A	B	B	B	A	B	A	A	A	B	B	A	A	B	A	B	A
S1_13345174	1	69.68003	A	B	B	B	A	B	B	A	B	B	B	A	A	B	B	H	B	B	B	B	A	A	A	B	B	B	B	A	B	B	A	B	B	B	A	B	A	A	A	B	B	A	A	B	A	B	A
S1_13508637	1	69.83	A	B	B	B	A	B	B	A	B	B	B	A	A	B	B	H	B	B	B	B	A	A	A	B	B	B	B	A	B	B	A	B	B	B	A	B	A	A	A	B	B	A	A	B	A	B	A
S1_13541771	1	69.85	A	B	B	B	A	B	B	A	B	B	B	A	A	B	B	A	B	B	B	B	A	A	A	B	B	B	B	A	B	B	A	B	B	B	A	B	A	A	A	B	B	A	A	B	A	B	A
S1_14031408	1	70.68	A	B	B	B	A	B	B	A	B	B	B	A	A	B	B	H	B	B	B	B	A	A	A	B	B	B	B	A	B	B	A	B	B	B	N	B	A	A	A	B	B	A	A	B	A	B	A
S1_14034694	1	70.68001	A	B	B	B	A	B	B	A	B	B	B	A	A	B	B	H	B	B	B	B	A	A	A	B	B	B	B	A	B	B	A	B	B	B	A	B	A	A	A	B	B	A	A	B	A	B	A
S1_14048215	1	70.68002	N	B	N	B	A	B	B	A	B	B	B	A	A	B	B	H	B	B	B	B	A	A	A	B	B	B	B	A	B	B	A	B	B	B	A	B	A	A	A	B	B	A	A	B	A	B	A
S1_14059713	1	70.68003	A	B	B	B	A	B	B	A	B	B	B	A	A	B	B	H	B	B	B	B	A	A	A	B	B	B	B	A	B	B	A	B	B	B	A	B	A	A	A	B	B	A	A	B	A	B	A
S1_14060926	1	70.70001	A	B	B	B	A	B	B	A	B	B	B	A	A	B	B	H	B	B	B	B	A	A	A	B	B	B	B	A	B	B	A	B	B	B	A	B	A	A	A	B	B	A	A	B	A	B	A
S1_14079132	1	70.70002	A	B	B	H	A	B	B	A	B	B	B	A	A	B	B	H	B	B	B	B	A	A	A	B	B	B	B	A	B	B	A	B	B	B	A	B	A	A	A	B	B	A	A	B	A	B	A
S1_14079181	1	70.70003	A	B	B	B	A	B	B	A	B	B	B	A	A	B	B	H	B	B	B	B	A	A	A	B	B	B	B	A	B	B	A	B	B	B	A	B	A	A	A	B	B	A	A	B	N	B	A
S1_14102640	1	70.71	A	B	B	B	A	B	B	A	B	B	B	A	A	B	B	H	B	B	B	B	A	A	A	B	B	B	B	A	B	B	A	B	B	B	A	B	A	A	A	B	B	A	A	B	A	B	A
S1_14102658	1	70.71001	A	B	B	B	A	B	B	A	B	B	B	A	A	B	B	H	B	B	B	B	A	A	A	B	B	B	B	A	B	B	A	B	B	B	A	B	A	A	A	B	B	A	A	B	A	B	A
S1_14147802	1	70.74	A	B	B	B	A	B	B	A	B	B	B	A	A	B	B	H	B	B	B	B	A	A	A	B	B	B	B	A	B	B	A	B	B	N	A	B	A	A	A	B	B	A	A	B	A	B	A
S1_14147810	1	70.74001	A	B	B	B	A	B	B	A	B	B	B	A	A	B	B	H	B	B	B	B	A	A	A	B	B	B	B	A	B	B	A	B	B	N	A	B	A	A	A	B	B	A	A	B	A	B	A
S1_14147832	1	70.74002	A	B	B	B	A	B	B	A	B	B	B	A	A	B	B	H	B	B	B	B	A	A	A	B	B	B	B	A	B	B	A	B	B	N	A	B	A	A	A	B	B	A	A	B	A	B	A
S1_14306286	1	70.82	A	B	B	B	A	B	B	A	B	B	B	A	A	B	B	H	B	B	B	B	A	A	A	B	B	B	B	A	B	B	A	B	B	B	A	B	A	A	A	B	B	A	A	B	A	B	A
S1_14306288	1	70.82001	A	B	B	B	A	B	B	A	B	B	B	A	A	B	B	H	B	B	B	B	A	A	A	B	B	B	B	A	B	B	A	B	B	B	A	B	A	A	A	B	B	A	A	B	A	B	A
S1_14323019	1	70.83	A	B	B	B	A	B	B	A	B	B	B	A	A	B	B	H	B	B	B	B	A	A	A	B	B	B	B	A	B	B	A	B	B	B	A	B	A	A	A	B	B	A	A	B	A	B	A
S1_14326289	1	70.83001	A	B	B	B	A	B	B	A	B	B	B	A	A	B	B	H	B	B	B	B	A	A	A	B	B	B	B	A	B	B	A	B	B	B	A	B	A	A	A	B	B	A	A	B	A	B	A
S1_14326386	1	70.83002	A	B	B	B	A	B	B	A	B	B	B	A	A	B	B	H	B	B	B	B	A	A	A	B	B	B	B	A	B	B	A	B	B	B	A	B	A	A	A	B	B	A	A	B	A	B	A
S1_14328858	1	70.83003	A	B	B	B	A	B	B	A	B	B	B	A	A	B	B	H	B	B	B	B	A	A	A	B	B	B	B	A	B	B	A	B	B	B	A	B	A	A	A	B	B	A	A	B	A	B	A
S1_14356114	1	70.85	A	B	B	B	A	B	B	A	B	B	B	A	A	B	B	H	B	B	B	B	A	A	A	B	B	B	B	A	B	B	A	B	B	B	A	B	A	A	A	B	B	A	A	B	A	B	A
S1_14356124	1	70.85001	A	B	B	B	A	B	B	A	B	B	B	A	A	B	B	H	B	B	B	B	A	A	A	B	B	B	B	A	B	B	A	B	B	B	A	B	A	A	A	B	B	A	A	B	A	B	A
S1_14356819	1	70.85002	A	B	B	B	A	B	B	A	B	B	B	A	A	B	B	H	B	B	B	B	A	A	A	B	B	B	B	A	B	B	A	B	B	B	A	B	A	A	A	B	B	A	A	B	A	B	A
S1_14440058	1	70.89001	A	B	B	B	A	B	B	A	B	B	B	A	A	B	B	H	B	B	B	B	A	A	A	B	B	B	B	A	B	B	A	H	B	B	A	B	A	A	A	B	B	A	A	B	A	B	A
S1_14444933	1	70.9	A	B	B	B	A	B	B	A	B	B	B	A	A	B	B	H	B	B	B	B	A	A	A	B	B	B	B	A	B	B	A	B	B	B	A	B	A	A	A	B	B	A	A	B	A	B	A
S1_14461187	1	70.90001	A	B	B	B	A	B	B	A	B	B	B	A	A	B	B	H	B	B	B	B	A	A	A	B	B	B	B	A	B	B	A	B	B	B	A	B	A	A	A	B	B	A	A	B	A	B	A
S1_14510179	1	70.93	A	B	B	B	A	B	B	A	B	B	B	A	A	B	B	H	B	B	B	B	A	A	A	B	B	B	B	A	B	B	A	B	B	B	A	B	A	A	A	B	B	A	A	B	A	B	A
S1_14517775	1	70.95	A	B	B	B	A	B	B	A	B	B	B	A	A	B	B	H	B	B	B	B	A	A	A	B	B	B	B	A	B	B	A	B	B	B	A	B	A	A	A	B	B	A	A	B	A	B	A
S1_14631258	1	71.03	A	B	B	B	A	B	B	A	B	B	B	A	A	B	B	H	B	B	B	B	A	A	A	B	B	B	B	A	B	B	A	B	B	B	A	B	A	A	A	B	B	A	A	B	A	B	A
S1_14681706	1	71.09	A	B	B	B	A	B	B	A	B	B	B	A	A	B	B	H	B	B	B	B	A	A	A	B	B	B	B	A	B	B	A	B	B	B	A	B	A	A	A	B	B	A	A	B	A	B	A
S1_14737500	1	71.09001	A	B	N	B	A	B	B	A	B	B	B	A	A	B	B	H	B	B	B	B	A	A	A	B	B	B	N	A	B	B	A	B	B	B	A	N	A	A	A	B	B	A	A	B	A	B	A
S1_14818318	1	71.19	A	B	B	B	A	B	B	A	B	B	B	A	A	B	B	H	B	B	B	B	A	A	A	B	B	B	B	A	B	B	A	B	B	B	A	B	A	A	A	B	B	A	A	B	A	B	A
S1_14818347	1	71.19001	A	B	B	B	A	B	B	A	B	B	B	A	A	B	B	H	B	B	B	B	A	A	A	B	B	B	B	A	B	B	A	B	B	B	A	B	A	A	A	B	B	A	A	B	A	B	A
S1_14818348	1	71.19002	A	B	B	B	A	B	B	A	B	B	B	A	A	B	B	H	B	B	B	B	A	A	A	B	B	B	B	A	B	B	A	B	B	B	A	B	A	A	A	B	B	A	A	B	A	B	A
S1_14818360	1	71.19003	A	B	B	B	A	B	B	A	B	B	B	A	A	B	B	H	B	B	B	B	A	A	A	B	B	B	B	A	B	B	A	B	B	B	A	B	A	A	A	B	B	A	A	B	A	B	A
S1_14901198	1	71.19004	A	B	B	B	A	B	B	A	B	B	B	A	A	B	B	H	B	B	B	B	A	A	A	B	B	B	B	A	B	B	A	B	B	B	A	B	A	A	A	B	B	A	A	B	A	B	A
S1_14902367	1	71.19005	A	B	B	B	A	B	B	A	B	B	B	A	A	B	B	H	B	B	B	B	A	A	A	B	B	B	B	A	B	B	A	B	B	B	A	B	A	A	A	B	B	A	A	B	A	B	A
S1_14902372	1	71.19006	A	B	B	B	A	B	B	A	B	B	B	A	A	B	B	H	B	B	B	B	A	A	A	B	B	B	B	A	B	B	A	B	B	B	A	B	A	A	A	B	B	A	A	B	A	B	A
S1_14938489	1	71.33	A	B	B	B	A	B	B	A	B	B	B	A	A	B	B	H	B	B	B	B	A	A	A	B	B	B	B	A	B	B	A	B	B	B	A	B	A	A	A	B	B	A	A	B	A	B	A
S1_15059460	1	71.39	A	B	B	B	A	B	B	A	B	B	B	A	A	B	B	B	B	B	B	B	A	A	A	B	B	B	B	A	B	B	A	B	B	B	A	B	A	A	A	B	B	A	A	B	A	B	A
S1_15067115	1	71.39001	A	B	B	B	A	B	B	A	B	B	B	A	A	B	B	H	B	B	B	B	A	A	A	B	B	B	B	A	B	B	A	B	B	B	A	B	A	A	A	B	B	A	A	B	A	B	A
S1_15082745	1	71.4	A	B	B	B	A	B	B	A	B	B	B	A	A	B	B	H	B	B	B	B	A	A	N	B	B	B	B	A	B	B	A	B	B	B	A	B	A	A	A	B	B	A	A	B	A	B	A
S1_15153868	1	71.46	A	B	B	B	A	B	B	A	B	B	B	A	A	B	B	H	B	B	B	B	A	A	A	B	B	B	B	A	B	B	A	B	B	B	A	B	A	A	A	B	B	A	A	B	A	B	A
S1_15347929	1	71.63	A	B	B	B	A	B	B	A	B	B	B	A	A	B	B	H	B	B	B	B	A	A	A	B	B	B	B	A	B	B	A	B	B	B	A	B	A	A	A	B	B	A	A	B	A	B	A
S1_15393848	1	71.67	A	B	B	B	A	B	B	A	B	B	B	A	A	B	B	H	B	B	B	B	A	A	A	B	B	B	B	A	B	B	A	B	B	B	A	B	A	A	A	B	B	A	A	B	A	B	A
S1_15394062	1	71.67001	A	B	B	B	A	B	B	A	B	B	B	A	A	B	B	H	B	B	B	B	A	A	N	B	B	B	B	A	B	B	A	B	B	B	A	B	A	A	A	B	B	A	A	B	A	B	A
S1_15394832	1	71.67002	A	B	B	B	A	B	B	A	B	B	B	A	A	B	B	H	B	B	B	B	A	A	A	B	B	B	B	A	B	B	A	B	B	B	A	B	A	A	A	B	B	A	A	B	A	B	A
S1_15394856	1	71.67003	A	B	B	B	A	B	B	A	B	B	B	A	A	B	B	H	B	B	B	B	A	A	A	B	B	B	B	A	B	B	A	B	B	B	A	B	A	A	A	B	B	A	A	B	A	B	A
S1_15402532	1	71.68	A	B	B	B	A	B	B	A	B	B	B	A	A	B	B	H	B	B	B	B	A	A	A	B	B	B	B	A	B	B	A	B	B	B	A	B	A	A	A	B	B	A	A	B	A	B	A
S1_15441315	1	71.72	A	B	B	B	A	B	B	A	B	B	B	A	A	B	B	H	B	B	B	B	A	A	A	B	B	B	B	A	B	B	A	B	B	B	A	B	A	A	A	B	B	A	A	B	A	B	A
S1_15464889	1	71.73	A	B	B	B	A	B	B	A	B	B	B	A	A	B	B	H	B	B	B	B	A	A	A	B	B	B	B	A	B	B	A	B	B	B	A	B	A	A	A	B	B	A	A	B	A	B	A
S1_15834324	1	71.77	N	B	B	B	A	B	B	N	B	B	B	A	A	B	B	B	B	B	B	B	A	A	A	B	B	B	B	A	B	B	A	B	B	B	A	B	A	A	N	B	B	A	A	B	N	B	A
S1_15969171	1	71.78	A	B	B	B	A	B	B	A	B	B	B	A	A	B	B	H	B	B	B	B	A	A	A	B	B	B	B	A	B	B	A	B	B	B	A	B	A	A	A	B	B	A	A	B	A	B	A
S1_16322268	1	71.82	A	B	B	B	A	B	B	A	B	B	B	A	A	B	B	H	B	B	B	B	A	A	A	B	B	B	B	A	B	B	A	B	B	B	A	B	A	A	A	B	B	A	A	B	A	B	A
S1_16481045	1	71.83	A	B	B	B	A	B	B	A	B	B	B	A	A	B	B	H	B	B	B	B	A	A	A	B	B	B	B	N	B	B	A	B	B	B	A	B	A	A	A	B	B	A	A	B	A	B	A
S1_16508795	1	71.84	A	N	B	B	A	B	B	A	B	B	B	A	A	B	B	H	B	N	B	B	A	A	A	B	B	B	N	A	B	B	A	B	B	B	A	B	A	A	A	B	B	A	A	B	A	B	A
S1_16659980	1	71.85	A	B	B	B	A	B	B	A	B	B	B	A	A	B	B	H	B	B	B	B	A	A	A	B	B	B	B	A	B	B	A	B	B	B	A	B	A	A	A	B	B	A	A	B	A	B	A
S1_17160472	1	71.9	A	B	B	B	A	B	B	A	B	B	B	A	A	B	B	H	B	B	B	B	A	A	A	B	B	B	B	A	B	B	A	B	B	B	A	B	A	A	A	B	B	A	A	B	A	B	A
S1_17224082	1	71.92	A	B	B	B	A	B	B	A	B	B	B	A	A	B	B	H	B	B	B	B	A	A	A	B	B	B	B	A	B	B	A	B	B	B	A	B	A	A	A	B	B	A	A	B	A	B	A
S1_17831545	1	71.97	A	B	B	B	A	B	B	A	B	B	B	A	A	B	B	B	B	B	B	B	A	N	A	B	B	B	B	A	B	B	A	B	N	B	A	B	A	N	A	B	B	A	A	B	A	B	A
S1_17888105	1	71.98	A	B	B	B	A	B	B	N	B	B	N	A	N	B	B	A	B	B	B	B	A	A	A	B	B	B	B	A	B	B	A	B	B	B	A	B	A	A	A	B	B	A	A	B	A	B	A
S1_17898790	1	71.98001	A	B	B	B	A	B	B	A	B	B	B	A	A	B	B	B	B	B	B	B	A	A	A	B	B	B	B	A	B	B	A	B	B	B	A	B	A	A	A	B	B	A	A	B	A	B	A
S1_17922849	1	71.98002	A	B	B	B	A	B	B	A	B	B	B	A	A	B	B	H	B	B	B	B	A	A	A	B	B	B	B	A	B	B	A	B	B	B	A	B	A	A	A	B	B	A	A	B	A	B	A
S1_17937991	1	71.98003	A	B	B	B	A	B	B	A	B	B	B	A	A	B	B	H	B	B	B	B	A	A	A	B	B	B	B	A	B	B	A	B	B	B	A	B	A	A	A	B	B	A	A	B	A	B	A
S1_17968454	1	71.98004	A	B	B	B	A	B	B	A	B	B	B	A	A	B	B	H	B	B	B	B	A	A	A	B	B	B	B	A	B	B	A	B	B	B	A	B	A	A	A	B	B	A	A	B	A	B	A
S1_18095167	1	72	A	B	B	B	A	B	B	A	B	B	B	A	A	B	B	H	B	B	B	B	A	A	A	B	B	B	B	A	B	B	A	B	B	B	A	B	A	A	A	B	B	A	A	B	A	B	A
S1_18151148	1	72.00001	A	B	B	B	A	B	B	A	B	B	B	A	A	B	B	H	B	B	B	B	A	A	A	B	B	B	B	A	B	B	A	B	B	B	A	B	A	A	A	B	B	A	A	B	A	B	A
S1_18263214	1	72.12	A	B	B	B	A	B	B	A	B	B	B	A	A	B	B	H	B	B	B	B	A	A	A	B	B	B	B	A	B	B	A	B	B	B	A	B	A	A	A	B	B	A	A	B	A	B	A
S1_18464507	1	72.74	A	B	B	B	A	B	B	A	B	B	B	A	A	B	B	H	B	B	B	B	A	A	A	B	B	B	B	A	B	B	A	B	B	B	A	B	A	A	A	B	B	A	A	B	A	B	A
S1_18464549	1	72.74001	A	B	B	B	A	B	B	A	B	B	B	A	A	B	B	H	B	B	B	B	A	A	A	B	B	B	B	A	B	B	A	B	B	B	A	B	A	A	A	B	B	A	A	B	A	B	A
S1_18464561	1	72.74002	A	B	B	B	A	B	B	A	B	B	B	A	A	B	B	H	B	B	B	B	A	A	A	B	B	B	B	A	B	B	A	B	B	B	A	B	A	A	A	B	B	A	A	B	A	B	A
S1_18626303	1	73.12	A	B	B	B	A	B	B	A	B	B	B	A	A	B	B	H	B	B	B	B	A	A	A	B	B	B	B	A	B	B	A	H	B	B	A	B	A	A	A	B	B	A	A	B	A	B	A
S1_18653198	1	73.12001	A	B	B	B	A	B	B	A	B	B	B	A	A	B	B	H	B	B	B	B	A	A	A	B	B	B	B	A	B	B	A	H	B	B	A	B	A	A	A	B	B	A	A	B	A	B	A
S1_18653509	1	73.12002	A	B	B	B	A	B	B	A	B	B	B	A	A	B	B	H	B	B	B	B	A	A	A	B	B	B	B	A	B	B	A	H	B	B	A	B	A	A	A	B	B	A	A	B	A	B	A
S1_18721034	1	73.17	A	B	B	B	A	B	B	A	B	B	B	A	A	B	B	H	B	B	B	B	A	A	A	B	B	B	B	A	B	B	A	H	B	B	A	B	A	A	A	B	B	A	A	B	A	B	A
S1_18721048	1	73.17001	A	B	B	B	A	B	B	A	B	B	B	A	A	B	B	H	B	B	B	B	A	A	A	B	B	B	B	A	B	B	A	H	B	B	A	B	A	A	A	B	B	A	A	B	A	B	A
S1_18839100	1	73.22	A	B	B	B	A	B	B	A	B	B	B	A	A	B	B	H	B	B	B	B	A	A	A	B	B	B	B	A	B	B	A	H	B	B	A	B	A	A	A	B	B	A	A	B	A	B	A
S1_19059850	1	73.32	A	B	B	B	A	B	B	A	B	B	B	A	A	B	B	H	B	B	B	B	A	A	A	B	B	A	B	A	B	B	A	A	B	B	A	B	A	A	A	B	B	A	A	B	A	B	A
S1_19067826	1	73.32001	A	B	B	B	A	B	B	A	B	B	B	A	A	B	B	H	B	B	B	B	A	A	A	B	B	A	B	A	B	B	A	A	B	B	A	B	A	A	A	B	B	A	A	B	A	B	A
S1_19135857	1	73.36	A	B	B	B	A	B	B	A	B	B	B	A	A	B	B	H	B	B	B	B	A	A	A	B	B	A	B	A	B	B	A	A	B	B	A	N	A	A	A	B	B	A	A	B	A	B	N
S1_19247442	1	73.43	A	B	B	B	A	B	B	A	B	B	B	A	A	B	B	H	B	B	B	B	A	A	A	B	B	A	B	A	B	B	A	A	B	B	A	B	A	A	A	B	B	A	A	B	A	B	A
S1_19248785	1	73.43001	A	B	B	B	A	B	B	A	B	B	B	A	A	B	B	H	B	B	B	B	A	A	A	B	B	A	B	A	B	B	A	A	B	B	A	B	A	A	A	B	B	A	A	B	A	B	A
S1_19259904	1	73.43002	A	B	B	B	A	B	B	A	B	B	B	A	A	B	B	H	B	B	B	B	A	A	A	B	B	A	B	A	B	B	A	A	B	B	A	B	A	A	A	B	B	A	A	B	A	B	A
S1_19259955	1	73.43003	A	B	B	B	A	B	B	A	B	B	B	A	A	B	B	H	B	B	B	B	A	A	A	B	B	A	B	A	B	B	A	A	B	B	A	B	A	A	A	B	B	A	A	B	A	B	A
S1_19405589	1	74.23	A	B	B	B	A	B	B	A	B	B	B	A	A	B	B	H	B	B	B	B	A	A	A	B	B	A	B	A	B	B	A	A	B	B	A	B	A	A	A	B	B	A	A	B	A	B	A
S1_19407124	1	74.23001	A	B	B	B	A	B	B	A	B	B	B	A	A	B	B	H	B	B	B	B	A	A	A	B	B	A	B	A	B	B	A	A	B	B	A	B	A	A	A	B	B	A	A	B	A	B	A
S1_19437144	1	74.26	N	B	B	B	A	B	B	A	B	B	B	A	A	B	B	H	B	B	B	B	A	A	A	B	B	A	B	A	B	B	A	A	B	B	A	B	A	A	A	B	B	A	A	B	A	B	A
S1_19507980	1	74.3	A	B	B	B	A	B	B	A	B	B	B	A	A	B	B	H	B	B	B	B	A	A	A	B	B	A	B	A	B	B	A	A	B	B	A	B	A	A	A	B	B	A	A	B	A	B	A
S1_19510469	1	74.30001	A	B	B	B	A	B	B	A	B	B	B	A	A	B	B	H	B	B	B	B	A	A	A	B	B	A	B	A	B	B	A	A	B	B	A	B	A	A	A	B	B	A	A	B	A	B	A
S1_19510535	1	74.30002	A	B	B	B	A	B	B	A	B	B	B	A	A	B	B	H	B	B	B	B	A	A	A	B	B	A	B	A	B	B	A	A	B	B	A	B	A	A	A	B	B	A	A	B	A	B	A
S1_19510556	1	74.30003	A	B	B	B	A	B	B	A	B	B	B	A	A	B	B	H	B	B	B	B	A	A	A	B	B	A	B	A	B	B	A	A	B	B	A	B	A	A	A	B	B	A	A	B	A	B	A
S1_19968892	1	74.78	A	B	B	B	A	B	B	A	N	B	B	A	A	B	B	H	B	B	B	B	A	A	A	B	B	A	B	A	B	B	A	A	B	B	A	B	A	A	A	N	B	A	N	B	A	B	A
S1_19980169	1	74.78001	A	B	B	B	A	B	B	A	B	B	B	A	A	B	B	H	B	B	B	B	A	A	A	B	B	A	B	A	B	B	A	A	B	B	A	B	A	A	A	B	B	A	A	B	A	B	A
S1_19988984	1	74.78002	A	B	B	B	A	B	B	A	B	B	B	A	A	B	B	H	B	B	B	B	A	A	A	B	B	A	B	A	B	B	A	A	B	B	A	B	A	A	A	B	B	A	A	B	A	B	A
S1_20058590	1	74.96	A	B	B	B	A	B	B	A	B	B	B	A	A	B	B	H	B	B	B	B	A	A	A	B	B	A	B	A	B	B	A	A	B	B	A	B	A	A	A	B	B	A	A	B	A	B	A
S1_20058595	1	74.96001	A	B	B	B	A	B	B	A	B	B	B	A	A	B	B	H	B	B	B	B	A	A	A	B	B	A	B	A	B	B	A	A	B	B	A	B	A	A	A	B	B	A	A	B	A	B	A
S1_20058608	1	74.96002	A	B	B	B	A	B	B	A	B	B	B	A	A	B	B	H	B	B	B	B	A	A	A	B	B	A	B	A	B	B	A	A	B	B	A	B	A	A	A	B	B	A	A	B	A	B	A
S1_20089471	1	75.13	A	B	B	B	A	B	B	A	B	B	B	A	A	B	B	N	B	B	N	B	A	A	A	B	B	A	B	A	B	B	A	A	B	B	A	B	A	A	A	B	B	A	A	B	A	B	A
S1_20089519	1	75.13001	A	B	B	B	A	B	B	A	B	B	B	A	A	B	B	N	B	B	N	B	A	A	A	B	B	A	B	A	B	B	A	A	B	B	A	B	A	A	A	B	B	A	A	B	A	B	A
S1_20089592	1	75.13002	A	B	B	B	A	B	B	A	B	B	B	A	A	B	B	H	B	B	B	B	A	A	A	B	B	A	B	A	B	B	A	A	B	B	A	B	A	A	A	B	B	A	A	B	A	B	A
S1_20089596	1	75.13003	A	B	B	B	A	B	B	A	B	B	B	A	A	B	B	H	B	B	B	B	A	A	A	B	B	A	B	A	B	B	A	A	B	B	A	B	A	A	A	B	B	A	A	B	A	B	A
S1_20156028	1	75.16	A	B	B	B	A	B	B	A	B	B	B	A	A	B	B	H	B	B	B	B	A	A	A	B	B	A	B	A	B	B	A	A	B	B	A	B	A	A	A	B	B	A	A	B	A	B	A
S1_20242878	1	75.24001	A	B	B	B	A	B	B	A	B	B	B	A	A	B	B	H	B	B	B	B	A	A	A	B	B	A	B	A	B	B	A	A	B	B	A	B	A	A	A	B	B	A	A	B	A	B	A
S1_20242882	1	75.24002	A	B	B	B	A	B	B	A	B	B	B	A	A	B	B	H	B	B	B	B	A	A	A	B	B	A	B	A	B	B	A	A	B	B	A	B	A	A	A	B	B	A	A	B	A	B	A
S1_20242937	1	75.24003	A	B	B	B	A	B	B	A	B	B	B	A	A	B	B	H	B	B	B	B	A	A	A	B	B	A	B	A	B	B	A	A	B	B	A	B	A	A	A	B	B	A	A	B	A	B	A
S1_20285460	1	75.29	A	B	B	B	A	B	B	A	B	B	B	A	A	B	B	H	B	B	B	B	A	A	A	B	B	A	B	A	B	B	A	A	B	B	A	B	A	A	A	B	B	A	A	B	A	B	A
S1_20285488	1	75.29001	A	B	B	B	A	B	B	A	B	B	B	A	A	B	B	H	B	B	B	B	A	A	A	B	B	A	B	A	B	B	A	A	B	B	A	B	A	A	A	B	B	A	A	B	A	B	A
S1_20285511	1	75.29002	A	B	B	B	A	B	B	A	B	B	B	A	A	B	B	H	B	B	B	B	A	A	A	B	B	A	B	A	B	B	A	A	B	B	A	B	A	A	A	B	B	A	A	B	A	B	A
S1_20285559	1	75.29003	A	B	B	B	A	B	B	A	B	B	B	A	A	B	B	H	B	B	B	B	A	A	A	B	B	A	B	A	B	B	A	A	B	B	A	B	A	A	A	B	B	A	A	B	A	B	A
S1_20303903	1	75.31	A	B	B	B	A	B	B	A	B	B	B	A	A	B	B	H	B	B	B	B	A	A	A	B	B	A	B	A	B	B	A	A	B	B	A	B	A	A	A	B	B	A	A	B	A	B	A
S1_20305418	1	75.31001	A	B	B	B	A	B	B	A	B	B	B	A	A	B	B	H	B	B	B	B	A	A	A	B	B	A	B	A	B	B	A	A	B	B	A	B	A	A	A	B	B	A	A	B	A	B	A
S1_20396509	1	75.69	A	B	B	B	A	B	A	A	B	B	B	A	A	B	B	H	B	B	B	B	A	A	A	B	B	A	B	A	B	B	A	A	B	B	A	B	A	A	A	B	B	A	A	B	A	B	A
S1_20396944	1	75.69001	A	B	B	B	A	B	A	A	B	B	B	A	A	B	B	H	B	B	B	B	A	A	A	B	B	A	B	A	B	B	A	A	B	B	A	B	A	A	A	B	B	A	A	B	A	B	A
S1_20396951	1	75.69002	A	B	B	B	A	B	A	A	B	B	B	A	A	B	B	H	B	B	B	B	A	A	A	B	B	A	B	A	B	B	A	A	B	B	A	B	A	A	A	B	B	A	A	B	A	B	A
S1_20418175	1	75.85	A	B	B	B	A	B	A	A	B	B	B	A	A	B	B	H	B	B	B	B	A	A	A	B	B	A	B	A	B	B	A	A	B	B	A	B	A	A	A	B	B	A	A	B	A	B	A
S1_20418207	1	75.85001	A	B	B	B	A	B	A	A	B	B	B	A	A	B	B	H	B	B	B	B	A	A	A	B	B	A	B	A	B	B	A	A	B	B	A	B	A	A	A	B	B	A	A	B	A	B	A
S1_20454249	1	76.27	A	B	B	B	A	B	A	A	B	B	B	A	A	B	B	H	B	B	B	B	A	A	A	B	B	A	B	A	B	B	A	A	B	B	A	B	A	A	A	B	B	A	A	B	A	B	A
S1_20523848	1	76.68	A	B	B	B	A	B	A	A	B	B	B	A	A	B	B	H	B	B	B	B	A	A	A	B	B	A	B	A	B	B	A	A	B	B	A	B	A	A	A	B	B	A	A	B	A	B	A
S1_20571077	1	76.94	A	B	B	B	A	B	A	A	B	B	B	A	A	B	B	H	B	B	B	B	A	A	A	B	B	A	B	A	B	B	A	A	B	B	A	B	A	A	A	B	B	A	A	B	A	B	A
S1_20705831	1	77.65	A	B	B	B	A	B	A	A	B	B	B	A	A	B	B	H	B	B	B	B	A	A	A	B	B	A	B	A	B	B	A	A	B	B	A	B	A	A	A	B	B	A	A	B	A	B	A
S1_20705832	1	77.65001	A	B	B	B	A	B	A	A	B	B	B	A	A	B	B	H	B	B	B	B	A	A	A	B	B	A	B	A	B	B	A	A	B	B	A	B	A	A	A	B	B	A	A	B	A	B	A
S1_20936106	1	78.08	A	B	B	B	A	B	A	A	B	B	B	A	A	B	B	H	B	B	B	B	A	A	A	B	B	A	B	B	B	B	A	A	B	B	A	B	A	A	A	B	B	A	A	B	A	B	A
S1_20945345	1	78.1	A	B	B	B	A	B	A	A	B	B	B	A	A	B	B	A	B	B	B	B	A	A	A	B	B	A	B	B	B	B	A	A	B	B	A	B	A	A	A	B	B	A	A	B	A	B	A
S1_20949264	1	78.13	A	B	B	N	A	B	A	A	B	B	B	A	A	B	B	A	N	B	B	B	A	A	A	B	B	A	B	N	B	B	A	A	B	B	A	B	A	A	A	B	B	A	A	B	A	B	A
S1_21632493	1	79.59	A	B	B	B	A	B	A	A	B	B	B	A	A	B	B	A	B	B	B	B	A	A	A	B	B	A	B	B	B	B	A	A	B	B	A	B	A	A	B	B	B	A	A	B	A	H	A
S1_21677321	1	79.69	A	B	B	B	A	B	A	A	B	B	B	A	A	B	B	A	B	B	B	B	A	A	A	B	B	A	B	N	B	B	A	A	B	B	A	B	A	A	N	B	B	A	A	B	A	A	A
S1_21688063	1	79.71	A	B	B	B	A	B	A	A	B	B	B	A	A	B	B	A	B	B	B	B	A	A	A	B	B	A	B	B	B	B	A	A	B	B	A	B	A	A	B	B	B	A	A	B	A	H	A
S1_21689318	1	79.72	A	B	B	B	A	B	A	A	B	B	B	A	A	B	B	A	B	B	B	B	A	A	A	B	B	A	N	B	B	B	A	A	B	B	N	B	A	A	B	B	B	N	A	B	N	B	A
S1_21689465	1	79.72001	A	B	B	B	A	B	A	A	B	B	B	A	A	B	B	A	B	B	B	B	A	A	A	B	B	A	B	B	B	B	A	A	B	B	A	B	A	A	B	B	B	A	A	B	A	H	A
S1_21707357	1	79.76	A	B	B	B	A	B	A	A	B	B	B	A	A	B	B	A	B	B	B	B	A	A	A	B	B	A	B	B	B	B	A	A	B	B	A	B	A	A	B	B	B	A	A	B	A	H	A
S1_21707361	1	79.76001	A	B	B	B	A	B	A	A	B	B	B	A	A	B	B	A	B	B	B	B	A	A	A	B	B	A	B	B	B	B	A	A	B	B	A	B	A	A	B	B	B	A	A	B	A	H	A
S1_21732483	1	79.84	A	B	B	B	A	B	A	A	B	N	N	A	A	B	B	A	B	B	B	B	A	A	A	N	B	A	B	B	B	B	A	A	B	B	A	B	A	A	B	B	B	A	A	B	A	A	A
S1_21732501	1	79.84001	A	B	B	B	A	B	A	A	B	N	N	A	A	B	B	A	B	B	B	B	A	A	A	N	B	A	B	B	B	B	A	A	B	B	A	B	A	A	B	B	B	A	A	B	A	A	A
S1_21733363	1	79.84002	A	B	B	N	A	B	A	A	B	B	B	A	A	B	B	A	B	B	B	B	A	A	A	B	B	A	B	B	B	B	A	A	B	B	A	B	A	A	B	B	B	A	A	B	A	H	A
S1_21736942	1	79.87	A	B	B	B	A	B	A	A	B	B	B	A	A	B	B	A	B	B	B	B	A	A	A	B	B	A	B	B	B	B	A	A	B	B	A	B	A	A	B	B	B	A	A	B	A	H	A
S1_21737002	1	79.87001	A	B	B	B	A	B	A	A	B	B	B	A	A	B	B	A	B	B	B	B	A	A	A	B	B	A	B	B	B	B	A	A	B	B	A	B	A	A	B	B	B	A	A	B	A	H	A
S1_21808068	1	80.89	A	B	B	B	A	B	A	A	B	B	B	A	N	B	B	A	B	B	N	B	A	A	A	B	B	A	N	B	B	B	A	A	B	B	A	B	A	A	B	B	B	A	A	B	A	H	A
S1_21887049	1	81.69	A	B	B	B	A	B	A	A	B	B	B	A	A	B	B	A	B	B	B	B	A	A	A	B	B	A	B	B	B	B	A	A	B	B	A	B	A	A	B	B	B	A	A	B	A	H	A
S1_21887495	1	81.69001	A	B	B	B	A	B	A	A	B	B	B	A	A	B	B	A	B	B	B	B	A	A	A	B	B	A	B	B	B	B	A	A	B	B	A	B	A	A	B	B	B	A	A	B	A	H	A
S1_21935884	1	82.12	A	B	B	B	A	B	A	A	B	B	B	A	A	B	B	A	B	B	B	B	A	A	A	B	B	A	B	B	B	B	A	A	B	B	A	B	A	A	B	B	B	A	A	B	A	H	A
S1_21945403	1	82.3	A	B	B	B	A	B	A	A	B	B	B	A	A	B	B	A	B	B	B	B	A	A	A	B	B	A	B	B	B	B	A	A	B	B	A	B	A	A	B	B	B	A	A	B	A	H	A
S1_21969368	1	82.52	N	B	B	B	A	B	N	A	B	B	B	A	A	B	B	A	B	B	B	B	A	A	A	B	B	A	B	B	B	B	A	A	B	B	A	B	A	A	B	H	B	A	A	B	A	H	A
S1_21993603	1	82.64	A	B	B	B	A	B	A	A	B	B	B	A	A	B	B	A	B	B	B	B	A	A	A	B	B	A	B	B	B	B	A	A	B	B	A	H	A	A	B	B	B	A	A	B	A	H	A
S1_21993710	1	82.64001	A	B	B	B	A	B	A	A	B	B	B	A	A	B	B	A	B	B	B	B	A	A	A	B	B	A	B	B	B	B	A	A	B	B	A	B	A	A	B	B	B	A	A	B	A	H	A
S1_21993711	1	82.64002	A	H	B	B	A	B	A	A	B	B	B	A	A	B	B	A	B	B	B	B	A	A	A	B	B	A	B	B	B	B	A	A	B	B	A	B	A	A	B	B	B	A	A	B	A	H	A
S1_21993713	1	82.64003	A	B	B	B	A	B	A	A	B	B	B	A	A	B	B	A	B	B	B	B	A	A	A	B	B	A	B	B	B	B	A	A	B	B	A	B	A	A	B	B	B	A	A	B	A	H	H
S1_21993714	1	82.64004	A	B	B	B	A	B	A	A	B	B	B	A	A	B	B	A	B	B	B	B	A	A	A	B	B	A	B	B	B	B	A	A	B	B	A	B	A	A	B	B	B	A	A	B	A	H	A
S1_21999896	1	82.73	A	B	B	B	A	B	A	A	B	B	B	A	A	B	B	A	B	B	B	B	A	A	A	B	B	A	B	B	B	B	A	A	B	B	A	B	A	A	B	B	B	A	A	B	A	H	A
S1_21999898	1	82.73001	A	B	H	B	A	B	A	A	H	H	B	A	A	B	B	A	B	B	B	B	A	A	A	B	B	A	H	B	B	B	A	A	B	B	A	B	A	A	H	B	B	A	A	B	A	H	A
S1_22068005	1	83.29	A	B	B	B	A	B	A	A	B	B	B	A	A	B	B	A	B	B	B	B	A	A	A	B	B	A	B	B	B	B	A	A	B	B	A	B	A	A	B	B	B	A	A	B	A	H	A
S1_22091010	1	83.33	A	B	B	B	A	B	A	A	B	B	B	A	A	B	B	A	B	B	B	B	A	A	A	B	B	A	B	B	B	B	A	A	B	B	A	B	A	A	B	H	B	A	A	B	A	H	A
S1_22091037	1	83.33001	A	B	B	B	A	B	A	A	B	B	B	A	A	B	B	A	B	B	B	B	A	A	A	B	B	A	B	B	B	B	A	A	B	B	A	B	A	A	B	H	B	A	A	B	A	H	A
S1_22096411	1	83.33002	A	B	B	B	A	B	A	A	B	B	B	A	A	B	B	A	B	B	B	B	A	A	A	B	B	A	B	B	B	B	A	A	B	B	A	B	A	A	B	B	B	A	A	B	A	H	A
S1_22096583	1	83.33003	A	B	N	B	A	B	A	A	B	B	B	A	A	B	B	A	B	B	B	B	A	A	A	B	B	A	B	B	B	B	A	A	B	B	A	B	A	A	B	B	B	A	A	B	A	H	A
S1_22114632	1	83.33004	A	B	B	B	A	B	A	A	B	B	B	A	A	B	B	A	B	B	B	B	A	A	A	B	B	A	B	B	B	B	A	A	B	B	A	B	A	A	B	B	B	A	A	B	A	H	A
S1_22340460	1	85.1	A	B	B	B	A	B	A	A	B	B	B	A	A	B	B	A	B	B	B	B	A	A	A	B	B	A	B	B	B	B	A	A	B	B	H	B	A	A	B	B	B	A	A	B	A	H	A
S1_22341287	1	85.13	A	B	B	B	A	B	A	A	B	B	B	A	A	B	B	A	B	B	B	B	A	A	A	B	B	A	B	B	B	B	A	A	B	B	H	B	A	A	B	B	B	A	A	B	A	H	A
S1_22385344	1	85.31	A	B	B	B	A	B	A	A	B	B	B	A	A	B	B	A	B	B	B	B	A	A	A	B	B	A	B	B	B	B	A	A	B	B	H	B	A	A	B	B	B	A	A	B	A	H	A
S1_22441431	1	85.41	A	B	B	B	A	B	A	A	B	B	B	A	A	B	B	A	B	B	B	B	A	A	A	B	B	A	B	B	B	B	A	A	B	B	H	B	A	A	B	B	B	A	A	B	A	H	A
S1_22506085	1	86.23	N	B	B	B	A	B	N	N	B	B	B	A	A	B	B	N	B	B	B	B	A	A	A	B	B	A	B	B	B	B	A	A	B	B	B	B	N	A	B	B	B	A	A	B	A	H	A
S1_22506087	1	86.23001	N	B	B	B	A	B	N	N	B	B	B	A	A	B	B	N	B	B	B	B	A	A	A	B	B	A	B	B	B	B	A	A	B	B	B	B	N	A	B	B	B	A	A	B	A	H	A
S1_22506134	1	86.23002	N	B	B	B	A	B	A	A	B	B	B	A	A	B	B	N	B	B	B	B	A	A	A	B	B	A	B	B	B	B	A	A	B	B	H	B	N	A	B	B	B	A	A	B	A	H	A
S1_22534815	1	86.23003	A	B	B	B	A	B	A	A	B	B	B	A	A	B	B	A	B	B	B	B	A	A	A	B	B	A	B	B	B	B	A	A	B	B	H	B	A	A	B	B	B	A	A	B	A	H	A
S1_22540590	1	86.23004	A	B	B	B	A	B	A	A	B	B	B	A	A	B	B	A	B	B	B	B	A	A	A	B	B	A	B	B	B	B	A	A	B	B	H	B	A	A	B	B	B	A	A	B	A	H	A
S1_22540617	1	86.23005	A	B	B	B	A	B	A	A	B	B	B	A	A	B	B	A	B	B	B	B	A	A	A	B	B	A	B	B	B	B	A	A	B	B	H	B	A	A	B	B	B	A	A	B	A	H	A
S1_22557807	1	86.23006	A	B	B	B	A	B	A	A	B	B	B	A	A	B	B	A	B	B	B	B	A	A	A	B	B	A	B	B	B	B	A	A	B	B	H	B	A	A	B	B	B	A	A	B	A	H	A
S1_22617559	1	87.05	A	B	B	B	A	B	A	A	B	B	B	A	A	B	B	A	B	A	B	B	A	A	A	B	B	A	B	B	B	B	A	A	B	B	H	B	A	A	B	B	B	A	A	B	A	H	A
S1_22635348	1	87.08	A	B	B	B	A	B	A	A	B	B	B	A	A	B	B	A	B	A	B	B	A	A	A	B	B	A	N	B	B	B	N	A	B	B	A	N	A	A	B	B	B	A	A	N	A	H	A
S1_22635933	1	87.15	A	B	B	B	A	B	A	A	B	B	B	A	A	B	B	A	B	A	B	B	A	A	A	B	B	A	B	B	B	B	A	A	B	B	H	B	A	A	B	B	B	A	A	B	A	H	A
S1_22651833	1	87.18	A	B	B	B	A	B	A	A	B	B	B	A	A	B	B	A	B	A	B	B	A	A	A	B	B	A	B	B	B	B	A	A	B	B	H	B	A	A	B	B	B	A	A	B	A	H	A
S1_22671614	1	87.26	A	B	B	B	A	B	A	A	B	B	B	A	A	B	B	A	B	A	B	B	A	A	A	B	B	A	B	B	B	B	A	A	B	B	H	B	A	A	B	B	B	A	A	B	A	H	A
S1_22678155	1	87.26001	A	B	B	B	A	B	A	A	B	B	B	A	A	B	B	A	B	A	B	B	A	A	A	B	B	A	B	B	B	B	A	A	B	B	H	B	A	A	B	B	B	A	A	B	A	H	A
S1_22705521	1	87.42	A	B	B	B	A	B	A	A	B	B	B	A	A	B	B	A	B	A	B	B	A	A	A	B	B	A	B	B	B	B	A	A	B	B	H	B	A	A	B	B	B	A	A	B	A	H	A
S1_22739159	1	87.51	A	B	B	B	A	B	A	A	B	B	B	A	A	B	B	A	B	A	B	B	A	A	A	B	B	A	B	B	B	B	A	A	B	B	H	B	A	A	B	B	B	A	A	B	A	H	A
S1_22745781	1	87.51001	A	B	B	B	A	B	A	A	B	B	B	A	A	B	B	A	B	A	B	B	A	A	A	B	B	A	B	B	B	B	A	A	B	B	H	B	A	A	B	B	B	A	A	B	A	H	A
S1_22756269	1	87.56	A	B	B	B	A	B	A	A	B	N	B	A	A	B	B	A	B	A	B	B	A	A	A	N	B	A	B	B	B	B	A	A	N	B	A	B	A	A	B	B	B	A	A	B	A	A	A
S1_22769724	1	87.61	A	B	B	B	A	B	A	A	B	B	B	A	A	B	B	A	B	A	B	B	A	A	A	B	B	A	B	B	B	B	A	A	B	B	H	B	A	A	B	B	B	A	A	B	A	H	A
S1_22775433	1	87.61001	A	B	B	B	A	B	A	A	B	B	B	A	A	B	B	A	B	A	B	B	A	A	A	B	B	A	B	B	B	B	A	A	B	B	H	B	A	A	B	B	B	A	A	B	A	H	A
S1_22775438	1	87.61002	A	B	B	B	A	B	A	A	B	B	B	A	A	B	B	A	B	A	B	B	A	A	A	B	B	A	B	B	B	B	A	A	B	B	H	B	A	A	B	B	B	A	A	B	A	H	A
S1_22783068	1	87.65	A	B	B	B	A	B	A	A	B	B	B	A	A	B	B	A	B	A	B	B	A	A	A	N	B	A	B	B	B	B	A	A	B	B	H	B	A	N	B	B	N	A	A	B	A	H	A
S1_22826112	1	87.79	A	B	B	B	A	B	A	A	B	B	B	A	A	B	B	A	B	A	B	B	A	A	A	B	B	A	B	B	B	B	A	A	B	B	H	B	A	A	B	B	B	A	A	B	A	H	B
S1_22840849	1	87.83	N	B	B	B	A	B	A	A	N	B	B	A	A	B	B	A	B	A	B	B	A	A	A	B	B	A	B	N	B	B	A	A	B	B	H	B	A	A	B	B	B	A	A	B	A	H	B
S1_22840882	1	87.83001	A	B	B	B	A	B	A	A	B	B	B	A	A	B	B	A	B	A	B	B	A	A	A	B	B	A	B	B	B	B	A	A	B	B	H	B	A	A	B	B	B	A	A	B	A	H	B
S1_22869343	1	87.89	A	B	B	B	A	B	A	A	B	B	B	A	A	B	B	A	B	A	B	B	A	A	A	B	B	A	B	B	B	B	A	A	B	B	H	B	A	A	B	B	B	A	A	B	A	H	B
S1_22881113	1	88.05	A	B	B	B	A	B	A	A	B	B	B	A	A	B	B	A	B	A	B	B	A	A	A	B	B	A	B	B	B	B	A	A	B	B	H	B	A	A	B	B	B	A	A	B	A	H	B
S1_22920401	1	88.11	N	B	B	B	A	B	A	A	B	B	B	A	A	B	B	A	B	A	B	B	A	A	A	B	B	A	B	B	B	B	A	A	B	B	H	B	A	A	B	B	B	A	A	B	A	H	B
S1_23120606	1	89.65	A	B	B	B	B	B	A	A	B	B	B	A	A	B	B	B	B	A	B	B	A	A	A	B	B	A	B	B	B	B	A	A	B	B	B	B	A	A	B	B	B	A	A	B	A	H	B
S1_23148164	1	89.71	A	B	B	B	B	B	A	A	B	B	B	A	A	B	B	B	B	A	B	B	A	A	A	B	B	A	B	B	B	B	A	A	B	B	B	B	A	A	B	B	B	A	A	B	A	H	B
S1_23247415	1	90.61	H	B	B	B	B	B	A	A	B	B	B	A	A	B	B	B	B	A	B	B	A	A	A	B	B	A	B	B	B	B	A	A	B	B	B	B	A	A	B	B	B	A	A	B	A	H	B
S1_23316331	1	91.11	A	B	B	B	B	B	A	A	A	B	B	A	A	B	B	B	B	A	B	B	A	A	A	B	B	A	B	B	B	B	A	A	B	B	B	B	A	A	B	B	B	A	A	B	A	H	B
S1_23339231	1	91.11001	A	B	B	B	B	B	A	A	A	B	B	A	A	B	B	B	B	A	B	B	A	A	A	B	B	A	B	B	B	B	A	A	B	B	B	B	A	A	B	B	B	A	A	B	A	H	B
S1_23345077	1	91.11002	A	B	B	B	B	B	A	A	A	B	B	A	A	B	B	B	B	A	B	B	A	A	A	B	B	A	B	B	B	B	A	A	B	B	B	B	A	A	B	B	B	A	A	B	A	H	B
S1_23353046	1	91.12	A	B	B	B	B	B	A	A	A	B	B	A	A	B	B	B	B	A	B	B	A	A	A	B	B	A	B	B	B	B	A	A	B	B	B	B	A	A	B	B	B	A	A	B	A	H	B
S1_23353062	1	91.12001	A	B	B	B	B	B	A	A	A	B	B	A	A	B	B	B	B	A	B	B	A	A	A	B	B	A	B	B	B	B	A	A	B	B	B	B	A	A	B	B	B	A	A	B	A	H	B
S1_23357929	1	91.14	A	B	B	B	B	B	A	A	A	B	B	A	A	B	B	B	B	A	B	B	A	A	A	B	B	A	B	B	B	B	A	A	B	B	B	B	A	A	B	B	B	A	A	B	A	H	B
S1_23447484	1	91.68	A	B	B	B	B	B	A	A	A	B	B	A	A	B	B	B	B	A	B	B	A	A	A	B	B	A	B	B	B	B	A	A	B	B	B	B	A	A	B	B	B	A	A	B	A	H	B
S1_23448207	1	91.68001	A	B	B	B	B	B	A	A	A	B	B	A	A	B	B	B	B	A	B	B	A	A	A	B	B	A	B	B	B	B	A	A	B	B	B	B	A	A	B	B	B	A	A	B	A	H	B
S1_23449676	1	91.68002	A	B	B	B	B	B	A	A	A	B	B	A	A	B	B	B	B	A	B	B	A	A	A	B	B	A	B	B	B	B	A	A	B	B	B	B	A	A	B	B	B	A	A	B	A	H	B
S1_23532709	1	92.34	A	B	B	B	B	B	A	A	A	B	B	A	A	B	B	B	B	A	B	B	A	A	A	B	B	A	B	B	B	B	A	A	B	B	B	B	A	A	B	B	B	A	A	B	A	H	B
S1_23532720	1	92.34001	A	B	B	B	B	B	A	A	A	B	B	A	A	B	B	B	B	A	B	B	A	A	A	B	B	A	B	B	B	B	A	A	B	B	B	B	A	A	B	B	B	A	A	B	A	H	B
S1_23551929	1	92.74	A	B	B	B	B	B	A	A	A	B	B	A	A	B	B	B	B	A	B	B	A	A	A	B	B	A	B	B	B	B	A	A	B	B	B	B	A	A	B	B	B	A	A	B	A	H	B
S1_23581632	1	92.82	A	B	B	B	B	B	A	A	A	B	B	A	A	B	B	B	B	A	B	B	A	A	A	B	B	A	B	B	B	B	A	A	B	B	B	B	A	A	B	B	B	A	A	B	A	H	B
S1_23642407	1	93.35	A	B	B	B	B	B	A	A	A	B	B	A	A	B	B	B	B	A	B	B	A	A	A	B	B	A	B	B	B	B	A	A	B	B	B	B	A	A	B	B	B	A	A	A	A	H	B
S1_23642506	1	93.35001	A	B	H	B	B	B	A	A	A	B	B	A	A	B	B	B	B	A	B	B	A	A	A	B	B	A	B	B	B	B	A	A	B	B	B	B	A	A	B	B	B	A	A	A	A	H	B
S1_23642522	1	93.35002	A	B	H	B	B	B	A	A	A	B	B	A	A	B	B	B	B	A	B	B	A	A	A	B	B	A	B	B	B	B	A	A	B	B	B	B	A	A	B	B	B	A	A	A	A	H	B
S1_23656200	1	93.47	A	B	B	B	B	B	A	A	A	B	B	A	A	B	B	B	B	A	B	B	A	A	A	B	B	A	B	B	B	B	A	A	B	B	B	B	A	A	B	B	B	A	A	A	A	H	B
S1_23656205	1	93.47001	A	B	B	B	B	B	A	A	A	B	B	A	A	B	B	B	B	A	B	B	A	A	A	B	B	A	B	B	B	B	A	A	B	B	B	B	A	A	B	B	B	A	A	A	A	H	B
S1_23656216	1	93.47002	A	B	B	B	B	B	A	A	A	B	B	A	A	B	B	B	B	A	B	B	A	A	A	B	B	A	B	B	B	B	A	A	B	B	B	B	A	A	B	B	B	A	A	A	A	H	B
S1_23684294	1	93.75	A	B	B	B	B	B	A	A	A	B	B	A	A	B	H	B	B	A	B	B	A	A	A	B	B	A	B	B	B	B	A	A	B	B	B	B	A	A	B	B	B	A	A	A	A	H	B
S1_23688645	1	93.75001	A	B	B	B	B	B	A	A	A	B	B	A	A	B	B	B	B	A	B	B	A	A	A	B	B	A	B	B	B	B	A	A	B	B	B	B	A	A	B	B	B	A	A	A	A	H	B
S1_23734519	1	94.47	A	B	B	B	B	B	A	A	A	B	B	A	A	B	B	N	N	A	B	B	A	A	A	B	B	A	B	N	N	B	A	A	N	B	B	B	A	A	N	B	B	A	A	A	A	A	N
S1_23735649	1	94.47001	A	B	B	B	B	B	A	A	A	B	B	A	A	B	B	B	B	A	B	B	A	A	A	B	B	A	B	B	B	B	A	A	B	B	B	B	A	A	B	B	B	A	A	A	A	H	B
S1_23751088	1	94.64	A	B	B	B	B	B	A	A	A	B	B	A	A	B	B	B	B	A	N	B	A	A	A	B	B	A	B	B	B	B	A	A	B	B	B	B	A	A	B	B	B	A	A	A	A	H	B
S1_23780579	1	94.71	A	B	B	B	B	B	A	A	A	B	B	A	A	B	B	B	B	A	B	B	A	A	A	B	B	A	B	B	B	B	A	A	B	B	B	B	A	A	B	B	B	A	A	A	A	H	B
S1_23780580	1	94.71001	A	B	B	B	B	B	A	A	A	B	B	A	A	B	B	B	B	A	B	B	A	A	A	B	B	A	B	B	B	B	A	A	B	B	B	B	A	A	B	B	B	A	A	A	A	H	B
S1_23788112	1	94.71002	A	B	B	B	B	B	A	A	A	B	B	A	A	B	B	B	B	A	B	B	A	A	A	B	B	A	B	B	B	B	A	A	B	B	B	B	A	A	B	B	B	A	A	A	A	H	B
S1_23788151	1	94.71003	A	B	B	B	B	B	A	A	A	B	B	A	A	B	B	B	B	A	B	B	A	A	A	B	B	A	B	B	B	B	A	A	B	B	B	B	A	A	B	B	B	A	A	A	A	H	B
S1_23813200	1	94.8	A	B	B	B	B	B	A	A	A	B	B	A	A	B	B	B	B	A	B	B	A	A	A	B	B	A	B	B	B	B	A	A	B	B	B	B	A	A	B	B	B	A	A	A	A	H	B
S1_23813208	1	94.80001	A	B	B	B	B	B	A	A	A	B	B	A	A	B	B	B	B	A	B	B	A	A	A	B	B	A	B	B	B	B	A	A	B	B	B	B	A	A	B	B	B	A	A	A	A	H	B
S1_23813223	1	94.80002	A	B	B	B	B	B	A	A	A	B	B	A	A	B	B	B	B	A	B	B	A	A	A	B	B	A	B	B	B	B	A	A	B	B	B	B	A	A	B	B	B	A	A	A	A	H	B
S1_23856777	1	94.91	A	B	B	B	B	B	A	A	A	B	B	A	A	B	B	B	B	A	B	B	A	A	A	B	B	A	B	B	B	B	A	A	B	B	B	B	A	A	B	B	B	A	A	A	A	H	B
S1_23857159	1	94.91001	A	B	B	B	B	B	A	A	A	B	B	A	A	B	B	B	B	A	B	B	A	A	A	B	B	A	B	B	B	B	A	A	B	B	B	B	A	A	B	B	B	A	A	A	A	H	B
S1_23860340	1	94.91002	A	B	N	B	B	B	A	A	A	B	B	A	A	B	B	B	B	A	B	B	A	A	A	B	B	A	B	B	B	B	A	A	B	B	B	B	A	A	B	B	B	A	A	A	A	H	B
S1_23861768	1	94.91003	A	B	B	B	B	B	A	A	A	B	B	A	A	B	B	B	B	A	B	B	A	A	A	B	B	A	B	B	B	B	A	A	B	B	B	B	A	A	B	B	B	A	A	A	A	H	B
S1_23946039	1	96.03	A	B	B	B	B	B	A	A	A	B	B	A	A	B	B	B	B	A	B	B	A	A	A	B	B	A	B	B	B	B	A	A	B	B	B	B	A	A	B	B	B	A	A	A	A	H	B
S1_23974957	1	96.2	A	B	B	B	B	B	A	A	A	B	B	A	A	B	B	B	B	A	B	B	A	A	A	B	B	A	B	B	B	B	A	A	B	B	B	B	A	A	B	B	B	A	A	A	A	A	B
S1_23981820	1	96.23	A	B	B	B	B	B	A	A	A	B	B	A	A	B	B	B	B	A	B	B	A	A	A	B	B	A	B	B	B	B	A	A	B	B	B	B	A	A	B	B	B	A	A	A	A	A	B
S1_23981855	1	96.23001	A	B	B	B	B	B	A	A	A	B	B	A	A	B	B	B	B	A	B	B	A	A	A	B	B	A	B	B	B	H	A	A	B	B	B	B	A	A	B	B	B	A	A	A	A	A	B
S1_24016179	1	96.63	A	B	B	B	B	B	A	A	A	B	B	A	A	B	B	B	B	A	B	B	A	A	A	B	B	A	N	B	B	B	A	A	B	B	B	B	A	A	B	B	B	A	A	A	A	A	B
S1_24042044	1	96.7	A	B	B	B	B	B	A	A	A	B	B	A	A	B	B	B	B	A	B	B	A	A	A	B	B	A	B	B	B	B	A	A	B	B	B	B	A	A	B	B	B	A	A	A	A	A	B
S1_24070770	1	96.75	A	B	B	B	B	B	A	A	A	B	B	A	A	B	B	B	B	A	B	B	A	A	A	B	B	A	B	B	B	B	A	A	B	B	B	B	A	A	B	B	B	A	A	A	A	A	B
S1_24072091	1	96.75001	A	B	B	B	B	B	A	A	A	B	B	A	A	B	B	B	B	A	B	B	A	A	A	B	B	A	B	B	B	B	A	A	B	B	B	B	A	A	B	B	B	A	A	A	A	A	B
S1_24084789	1	96.78	A	B	B	B	B	B	A	A	A	B	B	A	A	B	B	B	B	A	B	B	A	A	A	B	B	A	B	B	B	B	A	A	B	B	B	B	A	A	B	B	B	A	A	A	A	A	B
S1_24409989	1	99.38	A	B	B	B	B	B	A	A	A	B	B	A	A	A	H	B	B	B	B	B	A	A	A	B	B	A	B	B	B	B	A	A	B	B	B	B	B	A	B	B	B	A	B	A	A	A	B
S1_24774388	1	102.44001	A	B	B	B	B	B	A	A	A	A	B	A	A	A	B	B	B	B	B	B	A	A	A	B	A	A	B	B	B	B	A	A	B	B	B	B	B	A	B	B	B	A	B	A	A	A	B
S1_25272329	1	106.74	A	B	B	B	B	B	A	A	A	A	B	A	A	A	B	B	B	B	B	B	N	B	A	B	A	A	B	B	B	B	A	A	B	B	B	B	B	A	B	B	B	A	B	A	A	A	B
S1_25275937	1	106.74001	A	B	B	B	B	B	A	A	A	A	B	A	A	A	B	B	B	B	B	B	A	B	A	B	A	A	B	B	B	B	A	A	B	B	B	B	B	A	B	B	B	A	B	A	A	A	B
S1_25288648	1	106.74002	A	B	B	B	B	B	A	A	A	A	B	A	A	A	B	B	B	B	B	H	A	B	A	B	A	A	B	B	B	B	A	A	B	B	B	B	B	A	B	B	B	A	B	N	A	A	B
S1_25301750	1	106.74003	A	B	B	B	B	B	A	A	A	A	B	A	A	A	B	B	B	B	B	B	A	B	A	B	A	A	B	B	B	B	A	A	B	B	B	B	B	A	B	B	B	A	B	A	A	A	B
S1_25332353	1	106.75	A	N	B	B	B	B	A	A	A	A	B	A	A	A	N	B	B	B	B	B	A	B	N	B	H	A	B	B	B	B	A	A	N	B	B	B	B	A	B	B	B	A	B	A	A	A	B
S1_25378387	1	106.75001	A	B	B	B	B	B	A	A	A	A	B	A	A	A	B	B	B	B	B	B	A	B	A	B	A	A	B	B	B	B	A	A	B	B	B	B	B	A	B	B	B	A	B	A	A	A	B
S1_25378388	1	106.75002	A	B	B	B	B	B	A	A	A	A	B	A	A	A	B	B	B	B	B	B	A	B	A	B	A	A	B	B	B	B	A	A	B	B	B	B	B	A	B	B	B	A	B	A	A	A	B
S1_25440229	1	106.81	A	B	B	B	B	B	A	A	A	A	B	A	A	A	B	B	B	B	B	B	A	B	A	B	A	A	B	B	B	B	A	A	B	B	B	B	B	A	B	B	B	A	B	A	A	A	B
S1_25440661	1	106.81001	A	B	B	B	B	B	A	A	A	A	B	A	A	A	B	B	B	B	B	B	A	B	A	B	A	A	B	B	B	B	A	A	B	B	B	B	B	A	B	B	B	A	B	A	A	A	B
S1_25627837	1	106.9	A	B	B	B	B	B	A	A	A	A	B	A	A	A	B	B	B	B	B	B	A	B	A	B	A	A	B	B	B	B	A	A	B	B	B	B	B	A	B	B	B	A	B	A	A	A	B
S1_25646455	1	107.1	A	B	B	B	B	B	A	A	A	A	B	A	A	A	B	B	B	B	B	B	A	B	A	B	A	A	B	B	B	B	A	A	B	B	B	B	B	A	B	B	B	A	B	A	A	A	H
S1_25685988	1	107.26	A	B	B	B	B	B	A	A	A	A	B	A	A	A	B	B	B	B	B	B	A	B	A	B	A	A	B	B	B	B	A	A	B	B	B	B	B	A	B	B	B	A	B	A	A	A	B
S1_26041970	1	109.72	A	B	B	B	B	B	A	A	A	A	B	A	A	A	B	B	B	B	B	B	A	B	A	B	A	A	B	B	B	B	A	A	B	B	B	B	B	A	B	B	B	A	B	A	A	A	B
S1_26054050	1	109.86	A	B	B	B	B	B	A	A	A	A	B	A	A	A	B	B	B	B	B	B	A	B	A	B	A	A	B	B	B	B	A	A	B	B	B	B	B	A	B	B	B	A	B	A	A	A	B
S1_26057240	1	109.86001	A	B	B	B	B	B	A	A	A	A	B	A	A	A	B	B	B	B	B	B	A	B	A	B	A	A	B	B	B	B	A	A	B	B	B	B	B	A	B	B	B	A	B	A	A	A	B
S1_26120342	1	110.36	A	B	B	B	B	B	A	A	A	A	B	A	A	A	B	B	B	B	B	B	A	B	A	B	A	A	B	B	B	B	A	A	B	B	B	B	B	A	B	B	B	A	B	A	A	A	B
S1_26166015	1	110.49	A	B	B	B	B	B	A	A	A	A	B	A	A	A	B	B	B	B	B	B	A	B	A	B	A	A	B	B	B	B	A	A	B	B	B	B	B	A	B	B	B	A	B	A	A	A	A
S1_26170089	1	110.49001	A	B	B	B	B	B	A	A	A	A	B	A	A	A	B	B	B	B	B	B	A	B	A	B	A	A	B	B	B	B	A	A	B	B	B	B	B	A	B	B	B	A	B	A	A	A	A
S1_26184081	1	110.54	A	B	B	B	B	B	A	A	A	A	B	A	A	A	B	B	B	B	B	B	A	B	A	B	A	A	B	B	B	B	A	A	B	B	B	B	B	A	B	B	B	A	B	A	A	A	A
S1_26184319	1	110.54001	A	B	B	B	B	B	A	A	A	A	N	A	A	A	B	B	B	B	B	B	A	B	A	B	A	A	B	B	B	B	A	A	B	B	B	B	B	A	B	B	B	A	B	A	A	A	A
S1_26191454	1	110.55	A	B	B	B	B	B	A	A	A	A	B	A	A	A	B	B	B	B	B	B	A	B	A	B	A	A	B	B	B	B	A	A	B	B	B	B	B	A	B	B	B	A	B	A	A	A	A
S1_26306410	1	110.89	A	B	B	B	B	B	A	A	A	A	B	A	A	A	B	B	B	B	B	B	A	B	A	B	A	A	B	B	B	B	A	A	B	B	B	B	B	A	B	B	B	A	B	A	A	A	A
S1_26308774	1	110.89001	A	B	B	B	B	N	A	A	A	A	B	A	A	A	B	B	B	B	B	B	A	B	A	B	A	A	B	B	B	B	A	A	B	B	B	B	B	A	B	B	B	A	B	A	A	A	A
S1_26364162	1	111.11	A	B	B	B	B	B	A	A	A	A	B	A	A	A	B	B	B	B	B	B	A	B	A	B	A	A	B	B	B	B	A	A	B	B	B	B	B	A	B	B	B	A	B	A	A	A	A
S1_26365006	1	111.11001	A	B	B	B	B	B	A	A	A	A	B	A	A	A	B	B	B	B	B	B	A	B	A	B	A	A	B	B	B	B	A	A	B	B	B	B	B	A	B	B	B	A	B	A	A	A	A
S1_26365057	1	111.11002	A	B	B	B	B	B	A	A	A	A	B	A	A	A	B	B	B	B	B	B	A	B	A	B	A	A	B	B	B	B	A	A	B	B	B	B	B	A	B	B	B	A	B	A	A	A	A
S1_26368264	1	111.11003	A	B	B	B	B	B	A	A	A	A	B	A	A	A	B	B	B	B	B	B	A	B	A	B	A	A	B	B	B	B	A	A	B	B	B	B	B	A	B	B	B	A	B	A	A	A	A
S1_26421289	1	111.36	A	B	B	B	B	B	A	A	A	A	B	A	A	A	B	B	B	B	B	B	A	B	A	B	A	A	B	B	B	B	A	A	B	B	B	H	B	A	B	B	B	A	B	A	A	A	A
S1_26429276	1	111.42	A	B	B	B	B	B	A	A	A	A	B	A	A	A	B	B	B	B	B	B	A	B	A	B	A	A	B	B	B	B	A	A	B	B	B	B	B	A	B	B	B	A	B	A	A	A	A
S1_26430157	1	111.42001	A	B	B	B	B	B	A	A	A	A	B	A	A	A	B	B	B	B	B	B	A	B	A	B	A	A	B	B	B	B	A	A	B	B	B	B	B	A	B	B	B	A	B	A	A	A	A
S1_26447134	1	111.57	A	B	B	B	B	B	A	A	A	A	B	A	A	A	B	B	B	B	B	B	A	B	A	B	A	A	B	B	B	B	A	A	B	B	B	B	B	A	B	B	B	A	B	A	A	A	A
S1_26449260	1	111.57001	A	B	B	B	B	B	A	A	A	A	B	A	A	A	B	B	B	B	B	B	A	B	A	B	A	A	B	B	B	B	A	A	B	B	B	B	B	A	B	B	B	A	B	A	A	A	A
S1_26449563	1	111.57002	A	B	B	B	B	B	A	A	A	A	B	A	A	A	B	B	B	B	B	B	A	B	A	B	A	A	B	B	B	B	A	A	B	B	B	B	B	A	B	B	B	A	B	A	A	A	A
S1_26449564	1	111.57003	A	B	B	B	B	B	A	A	A	A	B	A	A	A	B	B	B	B	B	B	A	B	A	B	A	A	B	B	B	B	A	A	B	B	B	B	B	A	B	B	B	A	B	A	A	A	A
S1_26454221	1	111.57004	A	B	B	B	B	B	A	A	A	A	B	A	A	A	B	B	B	B	B	B	A	B	A	B	A	A	B	B	B	B	A	A	B	B	B	B	B	A	B	B	B	A	B	A	A	A	A
S1_26454308	1	111.57005	A	B	B	B	B	B	A	A	A	A	B	A	A	A	B	B	B	B	B	B	A	B	A	B	A	A	B	B	B	B	A	A	B	B	B	B	B	A	B	B	B	A	B	A	A	A	A
S1_26454311	1	111.57006	A	B	B	B	B	B	A	A	A	A	B	A	A	A	B	B	B	B	B	B	A	B	A	B	A	A	B	B	B	B	A	A	B	B	B	B	B	A	B	B	B	A	B	A	A	A	A
S1_26454315	1	111.57007	A	B	B	B	B	B	A	A	A	A	B	A	A	A	B	B	B	B	B	B	A	B	A	B	A	A	B	B	B	B	A	A	B	B	B	B	B	A	B	B	B	A	B	A	A	A	A
S1_26493023	1	111.98	A	B	B	B	B	B	A	A	A	A	B	A	A	N	B	B	B	B	B	B	A	B	A	B	A	A	B	B	B	B	A	A	B	B	B	B	B	A	B	B	B	A	N	A	A	A	A
S1_26532529	1	112.34	A	B	B	B	B	B	A	A	A	A	B	A	A	A	B	B	B	B	B	B	A	B	A	B	A	A	B	B	B	B	A	A	B	B	B	B	B	A	B	B	A	A	B	A	A	A	A
S1_26532536	1	112.34001	A	B	B	B	B	B	A	A	A	A	B	A	A	A	B	B	B	B	B	B	A	B	A	B	A	A	B	B	B	B	A	A	B	B	B	B	B	A	B	B	A	A	B	A	A	A	A
S1_26540603	1	112.39	A	B	B	B	B	B	A	A	A	A	B	A	A	A	B	B	B	B	B	B	A	B	A	B	A	A	B	B	B	B	A	A	B	B	B	B	B	A	B	B	A	A	B	A	A	A	A
S1_26577711	1	112.68	A	B	B	B	B	B	A	A	A	A	B	A	A	A	B	B	B	B	B	B	A	B	A	B	A	A	B	B	B	B	A	A	B	B	B	B	B	A	B	B	A	A	B	A	A	A	A
S1_26577712	1	112.68001	A	B	B	B	B	B	A	A	A	A	B	A	A	A	B	B	B	B	B	B	A	B	A	B	A	A	B	B	B	B	A	A	B	B	B	B	B	A	B	B	A	A	B	A	A	A	A
S1_26578381	1	112.68002	A	B	B	B	B	B	A	A	A	A	B	A	A	A	B	B	B	B	B	B	A	B	A	B	A	A	B	B	B	B	A	A	B	B	B	B	B	A	B	B	A	A	B	A	A	A	A
S1_26727382	1	114.01	A	B	B	B	B	B	A	A	A	A	B	A	A	A	B	B	B	B	B	B	A	B	A	B	A	A	B	B	B	B	A	A	B	B	B	B	B	A	B	B	A	A	B	A	A	A	A
S1_26826635	1	114.68	A	B	B	B	B	B	A	A	A	A	B	A	A	A	B	B	B	B	B	B	A	B	A	B	A	A	B	B	B	B	A	A	B	B	B	B	B	A	B	B	A	A	B	A	A	A	A
S1_27083902	1	115.15	A	B	B	B	B	B	A	A	A	A	B	A	A	A	B	B	B	B	B	B	A	H	A	B	A	A	B	B	B	B	A	A	B	B	B	B	B	A	B	B	A	A	B	A	A	A	A
S1_27092302	1	115.15001	A	B	B	B	B	B	A	A	A	A	B	A	A	A	B	B	B	B	B	B	A	H	A	B	A	A	B	B	B	B	A	A	B	B	B	B	B	A	B	B	A	A	B	A	A	A	A
S1_27113663	1	115.21	A	B	B	B	B	B	A	A	A	A	B	A	A	A	B	B	B	B	B	B	A	H	A	B	A	A	B	B	B	B	A	A	B	B	B	B	B	A	B	B	A	A	B	A	A	A	A
S1_27113695	1	115.21001	A	B	B	B	B	B	A	A	A	A	B	A	A	A	B	B	B	B	B	B	A	H	A	B	A	A	B	B	B	B	A	A	B	B	B	B	B	A	B	B	A	A	B	A	A	A	A
S1_27115706	1	115.21002	A	B	B	B	B	B	A	A	A	A	B	A	A	A	B	B	B	B	B	B	A	H	A	B	A	A	B	B	B	B	A	A	B	B	B	B	B	A	B	B	A	A	B	A	A	A	A
S1_27155770	1	115.28	A	B	B	B	B	B	A	A	A	A	B	A	A	A	B	B	B	B	B	B	A	H	A	B	A	A	B	B	B	B	A	A	B	B	B	B	B	A	B	B	A	A	B	A	A	A	A
S1_27155877	1	115.28001	A	B	B	B	B	B	A	A	A	A	B	A	A	A	B	B	B	B	B	B	A	H	A	B	A	A	B	B	B	B	A	A	B	B	B	B	B	A	B	B	A	A	B	A	A	A	A
S1_27192759	1	115.36	A	B	B	B	B	B	A	A	A	A	B	A	A	A	B	B	B	B	B	B	A	H	A	B	A	A	B	B	B	B	A	A	B	B	B	B	B	A	B	B	A	A	B	A	A	A	A
S1_27197221	1	115.37	A	B	B	B	B	B	A	A	A	A	B	A	A	A	B	B	B	B	B	B	A	H	A	B	A	A	B	B	B	B	A	A	B	B	B	B	B	A	B	B	A	A	B	A	A	A	A
S1_27342401	1	116.25	A	B	B	B	B	B	A	A	A	A	B	A	A	A	B	B	B	B	B	B	A	H	A	B	A	A	B	B	B	B	A	A	B	B	B	B	B	A	B	B	A	A	B	A	A	A	A
S1_27342433	1	116.25001	A	B	B	B	B	B	A	A	A	A	B	A	A	A	B	B	B	B	B	B	A	H	A	B	A	A	B	B	B	B	A	A	B	B	B	B	B	A	B	B	A	A	B	A	A	A	A
S1_27474455	1	116.43	A	B	B	B	B	B	A	A	A	A	B	A	A	A	B	B	B	B	B	B	A	H	A	B	A	A	B	B	B	B	A	A	B	B	B	B	B	A	B	B	A	A	B	A	A	A	A
S1_27482803	1	116.43001	A	B	B	B	B	B	A	A	A	A	B	A	A	A	B	B	B	B	B	B	A	H	A	B	A	A	B	B	B	B	A	A	B	B	B	B	B	A	B	B	A	A	B	A	A	A	A
S1_27515756	1	116.51	A	B	B	B	B	B	A	A	A	A	B	A	A	A	B	B	B	B	B	B	A	H	A	B	A	A	B	B	B	B	A	A	B	B	B	B	B	A	B	B	A	A	B	A	A	A	A
S1_27515760	1	116.51001	A	B	B	B	B	B	A	A	A	A	B	A	A	A	B	B	B	B	B	B	A	H	A	B	A	A	B	B	B	B	A	A	B	B	B	B	B	A	B	B	A	A	B	A	A	A	A
S1_27520625	1	116.54	A	B	B	B	B	B	A	A	A	A	B	A	A	A	B	B	B	B	B	B	A	H	A	B	A	A	B	B	B	B	A	A	B	B	B	B	B	A	B	B	A	A	B	A	A	A	A
S1_27624803	1	117.15	A	B	B	B	B	B	A	A	A	A	B	A	A	A	B	B	B	B	B	B	A	H	A	B	A	A	B	B	B	B	A	A	B	B	B	B	B	A	B	B	A	A	B	A	A	A	A
S1_28059309	1	118.17	A	B	B	B	B	B	H	A	A	A	B	A	A	A	B	B	B	B	B	B	A	H	A	B	A	A	B	B	B	B	A	A	B	B	B	B	B	A	B	B	A	A	B	A	A	A	A
S1_28126308	1	118.39	A	B	B	B	B	B	A	A	A	A	B	A	A	A	B	B	B	B	B	B	A	H	A	B	A	A	B	B	B	B	A	A	B	B	B	B	B	A	B	B	A	A	B	A	A	A	A
S1_28136322	1	118.61	A	B	B	B	B	B	A	A	A	A	B	A	A	A	B	B	B	B	B	B	A	H	A	B	A	A	B	B	B	B	A	A	B	B	B	B	B	A	B	B	A	A	B	A	A	A	A
S1_28254072	1	119.85	A	B	B	B	B	A	A	A	A	A	B	A	A	A	B	B	B	B	B	B	A	H	A	B	A	A	B	B	B	B	A	A	B	B	B	B	B	A	B	B	A	A	B	A	A	A	A
S1_28308596	1	120.15	A	B	B	B	B	A	A	A	A	A	B	A	A	A	B	B	B	B	B	B	A	H	A	B	A	A	B	B	B	B	A	A	B	B	B	B	B	A	B	B	A	A	B	A	A	A	A
S1_28315151	1	120.2	A	B	B	B	B	A	A	A	A	A	N	A	A	A	B	B	B	B	B	B	A	H	A	B	A	A	B	B	B	B	A	A	B	B	B	B	B	A	B	B	A	A	B	N	A	A	A
S1_28315187	1	120.20001	A	B	B	B	B	A	A	A	A	A	N	A	A	A	B	B	B	B	B	B	A	H	A	B	A	A	B	B	B	B	A	A	B	B	B	B	B	A	B	B	A	A	B	N	A	A	A
S1_28322679	1	120.22	A	B	B	B	B	A	A	A	A	A	B	A	A	A	B	B	B	B	B	B	A	H	A	B	A	A	B	B	B	B	A	A	B	B	B	N	B	A	B	B	A	A	B	A	A	A	A
S1_28323443	1	120.25	A	B	B	B	B	A	A	A	A	A	B	A	A	A	B	B	B	B	B	B	A	H	A	B	A	A	B	B	B	B	A	A	B	B	B	B	B	A	B	B	A	A	B	A	A	A	A
S1_28344067	1	120.33	A	B	B	B	B	A	A	A	A	A	B	A	A	A	B	B	B	B	B	B	A	H	A	N	A	A	B	B	B	B	A	A	B	B	B	B	B	A	B	B	A	A	B	A	A	A	A
S1_28371257	1	120.45	A	B	N	B	B	A	A	A	A	A	B	A	A	A	B	B	B	B	B	B	A	H	A	B	A	A	B	B	B	B	A	A	B	B	B	B	B	A	B	B	A	A	B	A	A	A	A
S1_28383640	1	120.53	A	B	B	B	B	A	A	A	A	A	B	A	A	A	B	B	B	B	B	B	A	H	A	B	A	A	B	B	B	B	A	A	B	B	B	B	B	A	B	B	A	A	B	A	A	A	A
S1_28429493	1	120.72	A	B	B	B	B	A	A	A	A	A	B	A	A	A	B	B	B	B	B	B	A	H	A	B	A	A	B	B	B	B	A	A	B	B	B	B	B	A	B	B	A	A	B	A	A	A	A
S1_28524433	1	121.29	A	B	B	B	B	A	A	A	A	A	B	A	A	A	B	B	B	B	B	B	A	H	A	B	A	A	B	B	B	B	A	A	B	B	B	B	B	A	B	B	A	A	B	A	A	A	A
S1_28524437	1	121.29001	A	B	B	B	B	A	A	A	A	A	B	A	A	A	B	B	B	B	B	B	A	H	A	B	A	A	B	B	B	B	A	A	B	B	B	B	B	A	B	B	A	A	B	A	A	A	A
S1_28524466	1	121.29002	A	B	B	B	B	A	A	A	A	A	B	A	A	A	B	B	B	B	B	B	A	H	A	B	A	A	B	B	B	B	A	A	B	B	B	B	B	A	B	B	A	A	B	A	A	A	A
S1_28526756	1	121.29003	N	B	B	B	B	A	A	A	A	A	N	A	A	A	B	B	B	B	B	B	A	H	A	B	A	A	B	B	B	B	A	A	B	B	B	B	B	A	B	B	A	A	B	A	A	A	A
S1_28526777	1	121.29004	N	B	B	B	B	A	A	A	A	A	N	A	A	A	B	B	B	B	B	B	A	H	A	B	A	A	B	B	B	B	A	A	B	B	B	B	B	A	B	B	A	A	B	A	A	A	A
S1_28526795	1	121.29005	N	B	B	B	B	A	A	A	A	A	N	A	A	A	B	B	B	B	B	B	A	H	A	B	A	A	B	B	B	B	A	A	B	B	B	B	B	A	B	B	A	A	B	A	A	A	A
S1_28526807	1	121.29006	N	B	B	B	B	A	A	A	A	A	N	A	A	A	B	B	B	B	B	B	A	H	A	B	A	A	B	B	B	B	A	A	B	B	B	B	B	A	B	B	A	A	B	A	A	A	A
S1_28535873	1	121.35	A	B	B	B	B	A	A	A	A	A	B	A	A	A	B	B	B	B	B	B	A	H	A	B	A	A	B	B	B	B	A	A	B	B	B	B	B	A	B	B	A	A	B	A	A	A	A
S1_28535874	1	121.35001	A	B	B	B	B	A	A	A	A	A	B	A	A	A	B	B	B	B	B	B	A	H	A	B	A	A	B	B	B	B	A	A	B	B	B	B	B	A	B	B	A	A	B	A	A	A	A
S1_28535900	1	121.35002	A	B	B	B	B	A	A	A	A	A	B	A	A	A	B	B	B	B	B	B	A	H	A	B	A	A	B	B	B	B	A	A	B	B	B	B	B	A	B	B	A	A	B	A	A	A	A
S1_28535938	1	121.35003	A	B	B	B	B	A	A	A	A	A	B	A	A	A	B	B	B	B	B	B	A	H	A	B	A	A	B	B	B	B	A	A	B	B	B	B	B	A	B	B	A	A	B	A	A	A	A
S1_28535942	1	121.35004	A	B	B	B	B	A	A	A	A	A	B	A	A	A	B	B	B	B	B	B	A	H	A	B	A	A	B	B	B	B	A	A	B	B	B	B	B	A	B	B	A	A	B	A	A	A	A
S1_28535953	1	121.35005	A	B	B	B	B	A	A	A	A	A	B	A	A	A	B	B	B	B	B	B	A	H	A	B	A	A	B	B	B	B	A	A	B	B	B	B	B	A	B	B	A	A	B	A	A	A	A
S1_28535990	1	121.35006	A	B	B	B	B	A	A	A	A	A	B	A	A	A	B	B	B	B	B	B	A	H	A	B	A	A	B	B	B	B	A	A	B	B	B	B	B	A	B	B	A	A	B	A	A	A	A
S1_28536019	1	121.35007	A	B	B	B	B	A	A	A	A	A	B	A	A	A	B	B	B	B	B	B	A	H	A	B	A	A	B	B	B	B	A	A	B	B	B	B	B	A	B	B	A	A	B	A	A	A	A
S1_28539176	1	121.35008	A	B	B	B	B	A	A	A	A	A	B	A	A	A	B	B	B	B	B	B	A	H	A	B	A	A	B	B	B	B	A	A	B	B	B	B	B	A	B	B	A	A	B	A	A	A	A
S1_28562525	1	121.43	A	B	B	B	B	A	A	A	A	A	B	A	A	A	B	B	B	B	B	B	A	H	A	B	A	A	B	B	B	B	A	A	B	B	B	B	B	A	B	B	A	A	B	A	A	A	A
S1_28562703	1	121.43001	A	B	B	B	B	A	A	A	A	A	B	A	A	A	B	B	B	B	B	B	A	H	A	B	A	A	B	B	B	B	A	A	B	B	B	B	B	A	B	B	A	A	B	A	A	A	A
S1_28569875	1	121.46	A	B	B	B	B	A	A	A	A	A	B	A	A	A	B	B	B	B	B	B	A	H	A	B	A	A	B	B	B	B	A	A	B	B	B	B	B	A	B	B	A	A	B	A	A	A	A
S1_28586737	1	121.51	A	B	B	B	B	A	A	A	A	A	B	A	A	A	B	B	B	B	B	B	A	H	A	B	A	A	B	B	B	B	A	A	B	B	B	B	B	A	B	B	A	A	B	A	A	A	A
S1_28586738	1	121.51001	A	B	B	B	B	A	A	A	A	A	B	A	A	A	B	B	B	B	B	B	A	H	A	B	A	A	B	B	B	B	A	A	B	B	B	B	B	A	B	B	A	A	B	A	A	A	A
S1_36445822	1	158.76	A	B	B	B	A	H	A	A	B	B	B	A	B	A	H	B	A	A	B	B	A	B	B	B	A	A	B	B	B	A	A	B	B	B	B	A	H	A	B	B	A	A	B	A	B	B	A
S1_36486745	1	158.77	A	N	B	B	A	B	A	A	B	B	B	A	B	A	H	B	A	A	B	B	A	B	B	B	A	A	B	B	B	A	H	B	B	B	B	A	H	A	B	B	A	A	B	A	B	B	A
S1_36492197	1	158.79	A	B	B	B	A	H	A	A	B	B	B	A	B	A	H	B	A	A	B	B	A	B	B	B	A	A	B	B	B	A	A	B	B	B	B	A	H	A	B	B	A	A	B	A	B	B	A
S1_36496101	1	158.79001	A	B	B	B	A	H	A	A	B	B	B	A	B	A	H	B	A	A	B	B	A	B	B	B	A	A	B	B	B	A	A	B	B	B	B	A	H	A	B	B	A	A	B	A	B	B	A
S1_36536164	1	158.8	A	B	B	B	A	H	H	A	B	B	B	A	B	A	H	B	A	A	B	B	A	B	B	B	A	A	B	B	B	A	A	B	B	B	B	A	H	A	B	B	A	A	B	A	B	B	A
S1_36544718	1	158.80001	A	B	B	B	A	H	A	A	B	B	B	A	B	A	H	B	A	A	B	B	A	B	B	B	A	A	B	B	B	A	A	B	B	B	B	A	H	A	B	B	A	A	B	A	B	B	A
S1_36717038	1	158.89	A	B	B	B	A	H	A	A	B	B	B	A	B	A	H	B	A	A	B	B	A	B	B	B	A	A	B	B	B	A	A	B	B	B	B	A	H	A	B	B	A	A	B	A	B	B	A
S1_36814116	1	158.94	A	B	B	B	A	H	A	A	B	B	B	A	B	A	H	B	A	A	B	B	A	B	B	B	A	A	B	B	B	A	A	B	B	B	B	A	H	A	B	B	A	A	B	A	B	B	A
S1_36953124	1	159.01	A	B	B	B	A	H	A	A	B	B	B	A	B	A	H	B	A	A	B	B	A	B	B	B	A	A	B	B	B	A	A	B	B	B	B	A	H	A	B	B	A	A	B	A	B	B	A
S1_36953125	1	159.01001	A	B	B	B	A	H	A	A	B	B	B	A	B	A	H	B	A	A	B	B	A	B	B	B	A	A	B	B	B	A	A	B	B	B	B	A	H	A	B	B	A	A	B	A	B	B	A
S1_36954707	1	159.01002	A	B	B	B	A	H	A	A	B	B	B	A	B	A	H	B	A	A	B	B	A	B	B	B	A	A	B	B	B	A	A	B	B	B	B	A	H	A	B	B	A	A	B	A	B	B	A
S1_40526762	1	185.17	A	B	B	B	B	B	A	B	B	B	H	A	B	B	B	B	A	A	B	B	B	B	A	B	A	B	B	B	B	B	B	B	B	B	B	A	H	A	B	B	B	A	B	A	A	A	A
S1_40526938	1	185.17001	A	B	B	B	B	B	A	B	B	B	H	A	B	B	B	B	A	A	B	B	B	B	A	B	A	B	B	B	B	B	B	B	B	B	B	A	H	A	B	B	B	A	B	A	A	A	A
S1_40527014	1	185.17002	A	B	B	B	B	B	A	B	B	B	H	A	B	B	B	B	A	A	B	B	B	B	A	B	A	B	B	B	B	B	B	B	B	B	B	A	H	A	B	B	B	A	N	A	A	A	A
S1_40557692	1	185.4	A	B	B	B	B	B	A	B	B	B	H	A	B	B	B	B	A	A	B	B	B	B	A	B	A	B	B	B	B	B	B	B	B	B	B	A	H	A	B	B	B	A	B	N	A	A	A
S1_40607927	1	185.52	A	B	B	B	B	N	A	B	B	B	H	A	B	B	B	B	A	A	B	B	B	B	A	B	A	B	B	B	B	B	B	B	B	B	B	N	H	A	B	B	B	A	B	A	A	A	N
S1_40612161	1	185.52001	A	N	B	B	B	B	A	B	B	B	H	A	B	B	B	B	A	A	B	B	B	B	A	B	A	B	B	N	B	B	B	B	B	B	B	A	H	A	N	B	B	A	B	A	A	A	A
S1_40614822	1	185.52002	A	B	B	B	B	B	A	B	B	B	H	A	B	B	B	B	A	A	B	B	B	B	A	B	A	B	B	B	B	B	B	B	B	B	B	A	H	A	B	B	B	A	B	A	A	A	A
S1_40618389	1	185.56	A	B	B	B	B	B	A	B	B	B	H	A	B	B	B	B	A	A	B	B	B	B	A	B	A	B	B	B	B	B	B	B	B	B	B	A	H	A	B	B	B	A	B	A	A	A	A
S1_40618489	1	185.56001	A	B	B	B	B	B	A	B	B	B	H	A	B	B	B	B	A	A	B	B	B	B	A	B	A	B	B	B	B	B	B	B	B	B	B	A	H	A	B	B	B	A	B	A	A	A	A
S1_40945564	1	189.4	A	B	B	B	B	A	A	B	B	B	H	A	B	A	A	B	A	A	B	B	B	B	A	B	A	B	B	B	B	B	B	B	B	B	H	H	H	A	B	B	B	A	B	A	A	A	A
S1_40985568	1	189.46	A	B	N	B	B	A	A	B	B	B	B	A	B	A	A	B	A	A	B	B	B	B	A	B	A	B	B	B	B	B	B	B	B	B	B	B	H	A	B	B	B	A	B	A	A	A	A
S1_40991060	1	189.48	A	B	B	B	B	A	A	B	B	B	H	A	B	A	A	B	A	A	B	B	B	B	A	B	A	B	B	B	B	B	B	B	B	B	H	H	H	A	B	B	B	A	B	A	A	A	A
S1_41000011	1	189.48001	A	B	B	B	B	A	A	B	B	B	H	A	B	A	A	B	A	A	B	B	B	B	A	B	A	B	B	B	B	B	B	B	B	B	H	H	H	A	B	B	B	A	B	A	A	A	A
S1_41008395	1	189.48002	N	B	B	B	B	A	A	B	B	B	H	A	B	A	A	B	A	A	B	B	B	B	A	B	A	B	B	B	B	B	B	B	B	B	H	H	H	A	B	B	B	A	B	A	A	A	A
S1_41012258	1	189.52	A	B	B	B	B	A	A	B	B	B	H	A	B	A	A	B	A	A	B	B	B	B	A	B	A	B	B	B	B	B	B	B	B	B	H	H	H	A	B	B	B	A	B	A	A	A	A
S1_41029848	1	189.53	A	B	B	B	B	A	A	B	B	B	H	A	B	A	A	B	A	A	B	B	B	B	A	B	A	B	B	B	B	B	B	B	B	B	H	H	H	A	B	B	B	A	B	A	A	A	A
S1_41109659	1	189.85	A	B	B	B	B	A	A	B	B	B	H	A	B	A	A	B	A	A	B	B	B	B	A	B	A	B	B	B	B	B	B	B	B	B	H	H	H	A	B	B	B	A	B	A	A	A	A
S1_41117485	1	190.06	A	B	B	B	B	A	A	B	B	B	H	A	B	A	A	B	A	A	B	B	B	H	A	B	A	B	B	B	B	B	B	B	B	B	H	B	B	A	B	B	B	A	B	A	A	A	A
S1_41166381	1	190.56	A	B	B	B	B	A	A	B	B	B	H	A	B	A	A	B	A	A	B	B	B	B	A	B	A	B	B	B	B	B	B	B	B	B	H	H	H	A	B	B	B	A	B	A	A	A	A
S1_41166865	1	190.56001	A	B	B	B	B	A	A	B	B	B	H	A	B	A	A	B	A	A	B	B	B	B	A	B	A	B	B	B	B	B	B	B	B	B	H	H	H	A	B	B	B	A	B	A	A	A	A
S1_41173462	1	190.56002	A	B	B	B	B	A	A	B	B	B	H	A	B	A	A	B	A	A	B	B	B	B	A	B	A	B	B	B	B	B	B	B	B	B	H	H	H	A	B	B	B	A	B	A	A	A	A
S1_41176940	1	190.56003	A	B	B	B	B	A	A	B	B	B	H	A	B	A	A	B	A	A	B	B	B	B	A	B	A	B	B	B	B	B	B	B	B	B	H	H	H	A	B	B	B	A	B	A	A	A	A
S1_41216617	1	191.2	A	B	B	B	B	A	A	B	B	B	H	A	B	A	A	B	A	A	B	B	B	B	A	B	A	B	B	B	B	B	B	B	B	B	H	H	H	A	B	B	B	A	B	A	A	A	A
S1_41218115	1	191.20001	A	B	B	B	B	A	A	B	B	B	H	A	B	A	A	B	A	A	B	B	B	B	A	B	A	B	B	B	B	B	B	B	B	B	H	H	H	A	B	B	B	A	B	A	A	A	A
S1_41267412	1	192.32	A	B	B	B	B	A	A	B	B	B	H	A	B	A	A	B	A	A	B	B	B	B	A	B	B	B	B	B	B	B	B	B	B	B	H	H	H	A	B	B	B	A	B	A	A	A	A
S1_41272443	1	192.34	A	B	B	B	B	A	A	B	B	B	H	A	B	A	A	B	A	A	B	B	B	B	A	B	B	B	B	B	B	B	B	B	B	B	H	H	H	A	B	B	B	A	B	A	A	A	A
S1_41272450	1	192.34001	A	B	B	B	B	A	A	B	B	B	H	A	B	A	A	B	A	A	B	B	B	B	A	B	B	B	B	B	B	B	B	B	B	B	H	H	H	A	B	B	B	A	B	A	A	A	A
S1_41299611	1	192.52001	A	B	B	B	B	A	A	B	B	B	B	A	B	A	A	B	A	A	B	B	B	B	A	B	B	B	B	B	B	B	B	B	B	B	H	B	H	A	B	B	B	A	B	A	A	A	A
S1_41299644	1	192.52002	A	B	B	B	B	A	A	B	B	B	H	A	B	A	A	B	A	A	B	B	B	B	A	B	B	B	B	B	B	B	B	B	B	B	H	H	H	A	B	B	B	A	B	A	A	A	A
S1_41299684	1	192.52003	A	B	B	B	B	A	A	B	B	B	B	A	B	A	A	B	A	A	B	B	B	B	A	B	B	B	B	B	B	B	B	B	B	B	H	H	H	A	B	B	B	A	B	A	A	A	A
S1_41299685	1	192.52004	A	B	B	B	B	A	A	B	B	B	B	A	B	A	A	B	A	A	B	B	B	B	A	B	B	B	B	B	B	B	B	B	B	B	H	H	H	A	B	B	B	A	B	A	A	A	A
S1_41314085	1	192.66	A	B	B	B	B	A	A	B	B	B	H	A	B	A	A	B	A	A	B	B	B	B	A	B	B	B	B	B	B	B	B	B	B	B	H	H	H	A	B	B	B	A	B	A	A	A	A
S1_41318988	1	192.66001	A	B	B	B	B	A	A	B	B	B	H	A	B	A	A	B	A	A	B	B	B	B	A	B	B	B	B	B	B	B	B	B	B	B	H	H	H	A	B	B	B	A	B	A	A	A	A
S1_41349554	1	192.97	A	B	B	B	B	A	A	B	B	B	H	A	B	A	A	B	A	A	B	B	B	B	A	B	B	B	B	B	B	B	B	B	B	B	H	H	H	A	B	B	B	A	B	A	A	A	A
S1_41373413	1	193.14	A	B	B	B	B	A	A	B	B	B	H	A	B	A	A	B	A	A	B	B	B	B	A	B	B	B	B	B	B	B	B	B	B	B	B	B	H	A	B	B	B	A	B	A	A	A	A
S1_41377010	1	193.14001	A	B	B	B	B	N	A	B	B	B	B	A	B	A	A	B	A	N	B	B	B	B	A	B	B	B	B	N	B	N	B	B	B	B	B	H	B	A	N	B	B	A	B	N	A	A	A
S1_41582385	1	194.5	A	B	B	B	B	A	A	B	B	B	H	A	B	A	A	B	A	A	B	B	B	B	A	B	B	B	B	B	B	B	B	B	B	B	H	H	H	A	B	B	B	A	B	A	A	A	A
S1_41582411	1	194.50001	A	B	B	B	B	A	A	B	B	B	H	A	B	A	A	B	A	A	B	B	B	B	A	B	B	B	B	B	B	B	B	B	B	B	H	H	H	A	B	B	B	A	B	A	A	A	A
S1_41591867	1	194.50002	A	B	B	B	B	A	A	B	B	B	H	A	B	A	A	B	A	A	B	B	B	B	N	B	B	B	B	B	B	B	B	B	B	B	H	H	H	A	B	B	B	A	B	A	A	A	A
S1_41628506	1	194.61	B	A	A	B	B	A	A	B	B	A	A	A	A	B	B	A	A	A	B	A	B	B	B	A	A	B	A	A	B	B	B	B	A	B	B	A	B	B	B	A	A	A	B	H	A	A	B
S1_41628509	1	194.61001	B	A	A	B	B	A	A	B	B	A	A	A	A	B	B	A	A	A	B	A	B	B	B	A	A	B	A	A	B	B	B	B	A	B	B	A	B	B	B	A	A	A	B	H	A	A	B
S1_41628520	1	194.61002	B	A	A	B	B	A	A	B	B	A	A	A	A	B	B	A	A	A	B	N	B	B	B	A	A	B	A	A	B	B	B	B	A	B	B	N	B	B	B	A	A	A	B	H	A	A	N
S1_41699648	1	195.17	A	B	B	B	B	A	A	B	B	B	H	A	B	A	A	B	A	A	B	B	B	B	A	B	B	B	B	B	B	B	B	B	B	B	H	H	H	A	B	B	B	A	B	A	A	A	A
S1_41705718	1	195.18	A	B	B	B	B	A	A	B	B	B	H	A	B	A	A	B	A	A	B	B	B	B	A	B	B	H	B	B	B	B	B	B	B	B	H	H	H	A	B	B	B	A	B	A	A	A	A
S1_41705739	1	195.18001	A	B	B	B	B	A	A	B	B	B	H	A	B	A	A	B	A	A	B	B	B	B	A	B	B	B	B	B	B	B	B	B	B	B	H	H	H	A	B	B	B	A	B	A	A	A	A
S1_41711989	1	195.18002	A	B	N	B	B	A	A	B	B	B	H	A	B	A	A	B	A	A	B	B	B	B	A	B	B	B	B	B	B	B	B	B	B	B	H	H	H	A	B	B	B	A	B	A	A	A	A
S1_41862368	1	196.05	A	B	B	B	B	A	A	B	B	B	H	H	B	A	A	B	A	A	B	B	B	B	A	B	B	B	B	B	B	B	B	B	B	B	A	A	H	A	B	B	B	A	B	A	A	A	A
S1_41866313	1	196.05001	A	B	B	B	B	A	A	B	B	B	H	B	B	A	A	B	A	A	B	B	B	B	A	B	B	B	B	B	B	B	B	B	B	B	A	H	H	A	B	B	B	A	B	A	A	A	A
S1_41901298	1	196.32001	A	B	B	B	B	A	A	B	B	B	H	B	B	A	A	B	A	A	B	B	B	B	A	B	B	B	B	B	B	B	B	B	B	B	A	H	H	A	B	B	B	A	B	A	A	A	A
S1_41910501	1	196.32002	A	B	B	B	B	A	A	B	B	B	H	B	B	A	A	B	A	A	B	B	B	B	A	B	B	B	B	B	B	B	B	B	B	B	A	H	H	A	B	B	B	A	B	A	A	A	A
S1_41938007	1	196.42	N	N	B	B	B	A	A	B	B	B	H	B	B	A	A	B	A	A	B	B	B	B	N	B	B	B	B	N	B	B	B	B	B	B	A	A	H	A	B	B	B	A	B	A	A	A	A
S1_41940407	1	196.42001	A	B	B	B	B	A	A	B	B	B	H	B	B	A	A	B	A	A	B	B	B	B	A	B	B	B	B	B	B	B	B	B	B	B	A	H	H	A	B	B	B	A	B	A	A	A	A
S1_41951811	1	196.46	A	B	B	B	B	A	A	B	B	B	H	B	B	A	A	B	A	A	H	B	B	B	A	B	B	B	B	B	B	B	B	B	B	B	A	H	H	A	B	B	B	A	B	A	A	A	A
S1_41962436	1	196.51	A	B	B	B	B	A	A	B	B	B	A	B	B	A	A	B	A	A	B	B	B	B	A	B	B	B	B	B	B	B	B	B	B	B	A	A	H	A	B	B	B	A	B	A	A	A	A
S1_41970345	1	196.52	A	B	B	B	B	A	A	B	B	B	A	B	B	A	A	B	A	A	B	B	B	B	A	B	B	B	B	B	B	B	B	B	B	B	A	H	H	A	B	B	B	A	B	A	A	A	A
S1_42003021	1	196.65	A	B	B	B	B	A	A	B	B	B	B	B	B	A	A	B	A	A	B	B	B	B	A	B	B	B	B	B	B	B	B	B	B	A	A	H	H	A	B	B	B	A	B	A	A	A	A
S1_42013388	1	196.69	A	B	B	B	B	A	A	B	B	B	H	B	B	A	A	B	A	A	B	B	B	B	A	B	B	B	B	B	B	B	B	B	B	A	A	H	H	A	B	B	B	A	B	A	A	A	A
S1_42018397	1	196.69001	A	B	B	B	B	A	A	B	B	B	H	B	B	A	A	B	A	A	B	B	B	B	A	B	B	B	B	B	B	B	B	B	B	A	A	H	H	A	B	B	B	A	B	A	A	A	A
S1_42074738	1	197.11002	A	B	B	B	B	A	A	B	B	B	H	B	B	A	A	B	A	A	B	B	B	B	A	B	B	B	B	B	B	B	B	B	B	A	A	H	A	A	B	B	B	A	B	A	A	A	A
S1_42074798	1	197.11003	A	B	B	B	B	A	A	B	B	B	H	B	B	A	A	B	A	A	B	B	B	B	A	B	B	B	B	B	B	B	B	B	B	A	A	H	A	A	B	B	B	A	B	A	A	A	A
S1_42074817	1	197.11004	A	B	B	B	B	A	A	B	B	B	H	B	B	A	A	B	A	A	B	B	B	B	A	B	B	B	B	B	B	B	B	B	B	A	A	H	A	A	B	B	B	A	B	A	A	A	A
S1_42080180	1	197.23	A	B	B	B	B	A	A	B	B	B	A	B	B	A	A	B	A	A	N	B	B	B	A	B	B	B	N	B	B	B	B	B	N	A	A	B	A	A	B	B	B	A	B	A	A	A	A
S1_42080282	1	197.23001	A	B	B	B	B	A	A	B	B	B	H	B	B	A	A	B	A	A	B	B	B	B	A	B	B	B	B	B	B	B	B	B	B	A	A	H	A	A	B	B	B	A	B	A	A	A	A
S1_42099409	1	197.32	A	B	B	B	B	A	A	B	B	B	H	B	B	A	A	B	A	A	B	B	B	B	A	B	B	B	B	B	B	B	B	B	B	A	A	H	A	A	B	B	B	A	B	A	A	A	A
S1_42102409	1	197.32001	A	B	B	B	B	A	A	B	B	B	H	B	B	A	A	B	A	A	B	B	B	B	A	B	B	B	B	B	B	B	B	B	B	A	A	H	A	A	B	B	B	A	B	A	A	A	A
S1_42110528	1	197.66	A	B	B	B	B	A	A	B	B	B	H	B	B	A	A	B	A	A	B	B	B	B	A	B	B	B	B	B	B	B	B	B	B	A	A	H	A	A	B	B	B	A	B	A	A	A	A
S1_42138516	1	198.21	A	B	B	B	B	A	A	B	A	B	H	B	B	A	A	B	A	A	B	B	B	B	A	B	B	B	B	B	B	B	B	B	B	A	A	H	A	A	B	B	B	A	B	A	A	A	A
S1_42214992	1	200.03	A	B	B	B	B	A	A	B	A	B	H	B	B	A	A	B	A	A	B	B	B	B	A	B	B	B	B	B	B	B	B	B	B	A	A	B	A	A	B	B	B	A	B	A	A	A	A
S1_42215067	1	200.03001	A	B	B	B	B	A	A	B	A	B	H	B	B	A	A	B	A	A	B	B	B	B	A	B	B	B	B	B	B	B	B	B	B	A	A	H	A	A	B	B	B	A	B	A	A	A	A
S1_42217541	1	200.03002	A	B	B	B	B	A	A	B	A	B	H	B	B	A	A	B	A	A	B	B	B	B	A	B	B	B	B	B	B	B	B	B	B	A	A	H	A	A	B	B	B	A	B	A	A	A	A
S1_42239968	1	200.12001	A	B	B	B	B	A	A	B	A	B	H	B	B	A	A	B	A	A	B	B	B	B	A	B	B	B	B	B	B	B	B	B	B	A	A	H	A	A	B	B	B	A	B	A	A	A	A
S1_42239969	1	200.12002	A	B	B	B	B	A	A	B	A	B	H	B	B	A	A	B	A	A	B	B	B	B	A	B	B	B	B	B	B	B	B	B	B	A	A	H	A	A	B	B	B	A	B	A	A	A	A
S1_42257197	1	200.28	A	B	B	B	B	A	A	B	A	B	H	B	B	A	A	B	A	A	B	B	B	B	A	B	B	B	B	B	B	B	B	B	B	A	A	H	A	A	B	B	B	A	B	A	A	A	A
S1_42257984	1	200.28001	A	B	B	B	B	A	A	B	A	B	H	B	B	A	A	B	A	A	B	B	B	B	A	B	B	B	B	B	B	B	B	B	B	A	A	H	A	A	B	B	N	A	B	A	A	A	A
S1_42310908	1	200.41	A	B	B	B	B	A	A	B	A	B	H	B	B	A	A	B	A	A	B	B	B	B	A	B	B	B	B	B	B	B	B	B	B	A	A	H	A	A	B	B	B	A	B	A	A	A	A
S1_42702065	1	201.59	A	B	B	B	B	A	A	B	A	B	A	B	B	A	A	B	A	A	B	B	H	B	A	B	B	B	A	B	B	B	B	B	A	A	A	H	A	A	B	B	B	A	B	A	A	A	A
S1_42705353	1	201.61	A	B	B	B	B	A	A	B	A	B	A	B	B	A	A	B	A	A	B	B	H	B	A	B	B	B	A	B	B	B	B	B	A	A	A	H	A	A	B	B	B	A	B	A	A	A	A
S1_42705355	1	201.61001	A	B	B	B	B	A	A	B	A	B	A	B	B	A	A	B	A	A	B	B	H	B	A	B	B	B	A	B	B	B	B	B	A	A	A	H	A	A	B	B	B	A	B	A	A	A	A
S1_42710825	1	201.63	A	B	B	B	B	A	A	B	A	B	A	B	B	A	A	B	B	A	B	B	H	B	A	B	B	B	A	B	B	B	B	B	A	A	A	H	A	A	B	B	B	A	B	A	A	A	A
S1_42710837	1	201.63001	A	B	B	B	B	A	A	B	A	B	A	B	B	A	A	B	B	A	B	B	H	B	A	B	B	B	A	B	B	B	B	B	A	A	A	H	A	A	B	B	B	A	B	A	A	A	A
S1_42755509	1	201.99	A	B	B	B	B	A	A	B	A	B	A	B	B	A	A	B	B	A	B	B	H	B	A	B	B	B	A	B	B	B	B	B	A	A	A	H	A	A	B	B	B	A	B	A	A	A	A
S1_42769571	1	201.99001	A	B	B	B	B	A	A	B	A	B	A	B	B	A	A	B	B	A	B	B	H	B	A	B	B	B	A	B	B	B	B	B	A	A	A	H	A	A	B	B	B	A	B	A	A	A	A
S1_42799636	1	202.57	A	B	B	B	B	A	A	B	A	B	A	B	B	A	A	B	B	A	B	B	H	B	A	B	B	B	A	B	B	B	B	B	A	A	A	H	A	A	B	B	B	A	B	A	A	A	A
S1_42819024	1	202.57001	A	B	B	B	B	A	A	B	A	B	A	B	B	A	A	B	B	A	B	B	H	B	A	B	B	B	A	B	B	B	B	B	A	A	A	H	A	A	B	B	B	A	B	A	A	A	A
S1_42827375	1	202.62	A	B	B	B	B	A	A	B	A	B	A	B	B	A	A	B	B	A	B	B	H	B	A	B	B	B	A	B	B	B	B	B	A	A	A	H	A	A	B	B	B	A	B	A	A	A	A
S1_42851976	1	202.85	A	B	B	B	B	A	A	B	A	B	A	B	B	A	A	B	B	A	B	B	H	B	A	B	B	B	A	B	B	B	B	B	A	A	A	H	A	A	B	B	B	A	B	A	A	A	A
S1_42875104	1	203.04	A	B	B	B	B	A	A	B	A	B	A	B	B	A	A	B	B	A	B	B	H	B	A	B	B	B	A	B	B	B	B	B	B	A	A	H	A	A	B	B	B	A	B	A	A	A	A
S1_42880262	1	203.04001	A	B	B	B	B	A	A	B	A	B	A	B	B	A	A	B	B	A	B	B	H	B	A	B	B	B	A	B	B	B	B	B	B	A	A	H	A	A	B	B	B	A	B	A	A	A	A
S1_42885627	1	203.04002	A	B	B	B	B	A	A	B	A	B	A	B	B	A	A	B	B	A	B	B	H	B	A	B	B	B	A	B	B	B	B	B	B	A	A	H	A	A	B	B	B	A	B	A	A	A	A
S1_42885648	1	203.04003	A	B	B	B	B	A	A	B	A	B	A	B	B	A	A	B	B	A	B	B	H	B	A	B	B	B	A	B	B	B	B	B	B	A	A	H	A	A	B	B	B	A	B	A	A	A	A
S1_42928362	1	203.4	A	B	B	B	B	A	A	B	A	B	A	B	B	A	A	B	B	A	B	B	H	B	A	B	B	B	A	B	B	B	B	B	B	A	A	H	A	A	B	B	B	A	B	A	A	A	A
S1_42984563	1	203.64	A	B	B	B	B	A	A	B	A	B	A	B	B	A	A	B	B	A	B	B	A	B	A	B	B	B	A	B	B	B	B	B	B	A	A	H	A	A	B	B	B	A	B	A	A	A	A
S1_43065133	1	203.82	A	B	B	B	B	A	A	B	A	B	A	B	B	A	A	B	B	A	B	B	A	B	A	B	B	B	A	B	B	B	B	B	B	A	A	B	A	A	B	B	B	A	B	A	A	A	A
S1_43077833	1	203.85	A	B	B	B	B	A	A	B	A	B	A	B	B	A	A	B	B	A	B	B	A	B	A	B	B	B	A	B	B	B	B	B	B	A	A	H	A	A	B	B	B	A	B	A	A	A	A
S1_43108024	1	203.86	N	B	B	B	B	A	A	B	A	B	A	B	B	A	A	B	H	A	B	B	A	B	A	B	B	B	A	B	B	B	B	B	B	A	A	A	A	A	B	B	B	A	B	A	A	A	A
S1_43137537	1	203.86001	A	B	B	B	B	A	A	B	A	B	A	B	B	A	A	B	B	A	B	B	A	B	A	B	B	B	A	B	B	B	B	B	B	A	A	B	A	A	B	B	B	A	B	A	A	A	A
S1_43137572	1	203.86002	A	B	B	B	B	A	A	B	A	B	A	B	B	A	A	B	B	A	B	B	A	B	A	B	B	B	A	B	B	B	B	B	B	A	A	B	A	A	B	B	B	A	B	A	A	A	A
S1_43172608	1	203.86003	A	B	B	B	B	A	A	B	A	B	A	B	B	A	A	B	B	A	B	B	A	B	A	B	B	B	A	B	B	B	B	B	B	A	A	H	A	A	B	B	B	A	B	A	A	A	A
S1_43176259	1	203.86004	A	B	B	B	B	A	A	B	A	B	A	B	B	A	A	B	B	A	B	B	A	B	A	B	B	B	A	B	B	B	B	B	B	A	A	H	A	A	B	B	B	A	B	A	A	A	A
S1_43176312	1	203.86005	A	B	B	B	B	A	A	B	A	B	A	B	B	A	A	B	B	A	B	B	A	B	A	B	B	B	A	B	B	B	B	B	B	A	A	H	A	A	B	B	B	A	B	A	A	A	A
S2_164206	2	0.7	B	A	B	A	A	B	A	A	B	B	A	H	A	A	A	B	A	A	A	B	B	A	A	B	B	B	A	A	A	A	B	A	A	H	A	B	H	B	B	A	A	A	A	A	B	H	A
S2_491868	2	1.92	B	A	B	A	A	B	A	A	B	B	A	A	A	A	A	A	A	A	A	B	H	A	A	B	B	B	A	A	A	A	H	A	B	H	A	B	H	B	B	A	A	H	A	A	B	H	A
S2_554664	2	2.35	B	A	B	A	A	B	A	A	B	B	A	A	A	A	A	A	A	A	A	B	H	A	A	B	B	B	A	A	A	A	H	A	B	H	A	B	H	B	B	A	A	H	A	A	B	H	A
S2_554685	2	2.35001	B	A	B	A	A	B	A	A	B	B	A	A	A	A	A	A	A	A	A	B	H	A	A	B	B	B	A	A	A	A	H	A	B	H	A	B	H	B	B	A	A	H	A	A	B	H	A
S2_575542	2	2.45	B	A	B	A	A	B	A	A	B	B	A	A	A	A	A	A	A	A	A	B	H	A	A	B	B	B	A	A	N	A	H	A	B	H	A	B	H	N	B	A	A	H	A	A	B	H	A
S2_636770	2	2.76	B	A	B	A	A	H	A	A	B	N	A	A	A	A	A	A	A	A	A	B	B	A	A	B	B	B	A	A	A	A	H	N	B	H	A	B	H	B	B	A	A	H	N	A	B	H	A
S2_639292	2	2.79	B	A	B	A	A	B	A	A	B	B	A	A	A	A	A	A	A	A	A	B	B	A	A	B	B	B	A	A	A	A	H	A	B	A	A	B	H	B	B	A	A	H	A	A	B	H	A
S2_639853	2	2.79001	B	A	B	A	A	B	A	A	B	B	A	A	A	A	A	A	A	A	A	B	H	A	A	B	B	B	A	A	A	A	H	A	B	H	A	B	H	B	B	A	A	H	A	A	B	H	A
S2_646266	2	2.79002	B	A	B	A	A	B	A	A	B	B	A	A	A	A	A	A	A	A	A	B	H	A	A	B	B	B	A	A	A	A	H	A	B	H	A	B	H	B	B	A	A	H	A	A	B	H	A
S2_647801	2	2.79003	B	A	B	A	A	B	A	A	B	B	A	A	A	A	A	A	A	A	A	B	H	A	A	B	B	B	A	A	A	A	H	A	B	H	A	N	B	B	B	A	A	A	A	A	B	H	A
S2_727036	2	3.06	B	A	B	A	A	B	A	A	B	B	A	A	B	A	A	A	A	A	A	B	H	A	A	B	B	B	A	A	A	A	H	A	B	H	A	B	H	B	B	A	A	H	A	A	B	H	A
S2_1321993	2	7.37	A	B	B	A	A	B	A	A	A	B	A	A	A	A	A	A	A	A	A	B	A	A	A	B	B	B	A	A	A	A	A	A	A	H	A	B	H	B	B	A	A	H	N	A	B	B	A
S2_1322019	2	7.37001	A	B	B	A	A	B	A	A	A	B	A	A	A	A	A	A	A	A	A	B	A	A	A	B	B	B	A	A	A	A	A	A	A	H	A	B	H	B	B	A	A	H	N	A	B	B	A
S2_1395032	2	8.19	A	B	N	A	A	B	A	A	A	B	A	A	A	A	A	A	A	A	A	B	A	A	A	B	B	B	A	A	A	A	A	A	A	H	A	B	A	B	B	A	A	A	A	A	B	B	A
S2_1402703	2	8.19001	A	B	B	A	A	B	A	A	A	B	A	A	A	A	A	A	A	A	A	B	A	A	A	B	B	B	A	A	A	A	A	A	A	H	A	B	A	B	B	A	A	H	A	A	B	B	A
S2_1445902	2	8.76	A	B	B	A	A	B	A	A	A	B	A	A	A	A	A	A	A	A	A	B	A	A	A	B	B	B	A	A	A	A	A	A	A	H	A	B	A	B	B	A	A	H	A	A	B	B	A
S2_1540921	2	9.67	A	B	B	A	A	B	A	A	A	A	A	A	A	A	A	A	A	A	A	B	A	A	A	B	B	B	A	A	A	A	A	A	A	H	A	B	A	B	B	A	A	A	A	A	B	B	A
S2_1541020	2	9.67001	A	B	B	A	A	B	A	A	A	A	A	A	A	A	A	A	A	A	A	B	A	A	A	B	B	B	A	A	A	A	A	A	A	H	A	H	A	B	B	A	A	A	A	A	B	B	A
S2_1550353	2	9.78	A	B	B	A	A	H	A	A	A	A	A	A	A	A	A	A	A	A	A	B	A	A	A	B	B	B	A	A	A	A	A	A	A	A	A	B	A	B	B	A	A	A	A	A	B	B	A
S2_1558869	2	9.91	A	B	B	A	A	B	A	A	A	A	A	A	A	A	A	A	A	A	A	B	A	A	A	B	B	B	A	A	A	A	A	A	A	H	A	B	A	B	B	A	A	A	A	A	B	B	A
S2_1994215	2	14.46	A	B	B	A	B	B	A	A	A	A	A	A	A	B	B	A	A	A	A	B	A	B	A	B	B	B	A	A	A	A	B	A	A	H	A	B	A	B	B	A	A	A	A	A	B	B	B
S2_2016720	2	14.59	A	B	B	A	B	B	A	A	A	A	A	A	N	B	B	A	A	A	A	B	A	B	A	B	B	B	A	N	A	A	B	A	A	N	A	B	A	B	B	A	A	A	A	N	B	B	B
S2_2016741	2	14.59001	A	B	B	A	B	B	A	A	A	A	A	A	N	B	B	A	A	A	A	B	A	B	A	B	B	B	A	N	A	A	B	A	A	N	A	B	A	B	B	A	A	A	A	N	B	B	B
S2_2065084	2	15.11	A	B	B	A	B	B	A	A	A	A	A	A	A	B	B	A	A	A	A	B	A	B	A	B	B	B	A	A	A	A	B	A	A	B	A	B	A	B	B	A	A	A	A	A	B	B	B
S2_2156344	2	15.66	A	B	B	A	B	B	A	A	A	A	A	A	A	B	B	A	A	A	A	B	A	B	A	B	B	B	A	A	A	A	B	A	A	B	A	B	A	B	B	A	A	A	A	A	B	B	B
S2_2180734	2	15.69	A	B	B	A	B	B	A	A	A	A	A	A	A	B	B	A	A	A	A	B	A	B	A	B	B	B	A	A	A	A	B	A	A	B	A	B	A	B	B	A	A	A	A	A	B	B	B
S2_2180755	2	15.69001	A	B	B	A	B	B	A	A	A	A	A	A	A	B	B	A	A	A	A	B	A	B	A	B	B	B	A	A	A	A	B	A	A	B	A	B	A	B	B	A	A	A	A	A	B	B	B
S2_2218261	2	15.74	A	B	B	A	B	B	A	A	A	A	A	A	A	B	B	A	A	A	A	B	A	B	A	B	B	B	A	A	A	A	B	A	A	B	A	B	A	B	B	A	A	A	A	A	B	B	B
S2_2218262	2	15.74001	A	B	B	A	B	B	A	A	A	A	A	A	A	B	B	A	A	A	A	B	A	B	A	B	B	B	A	A	A	A	B	A	A	B	A	B	A	B	B	A	A	A	A	A	B	B	B
S2_2218304	2	15.74002	A	B	B	A	B	B	A	A	A	A	A	A	A	B	B	A	A	A	A	B	A	B	A	B	B	B	A	A	A	A	B	A	A	B	A	B	A	B	B	A	A	A	A	A	B	B	B
S2_2372437	2	16.05	A	B	B	A	B	B	A	A	A	A	A	A	A	B	B	A	A	A	A	B	A	B	A	B	B	B	A	A	A	A	B	A	A	B	A	B	A	B	B	A	A	A	A	A	B	B	B
S2_2485001	2	16.05001	A	B	B	A	B	B	A	A	A	A	A	A	A	B	B	A	A	A	A	B	A	B	A	B	B	B	A	A	A	A	B	A	A	B	A	B	A	B	B	A	A	A	A	A	B	B	B
S2_2665570	2	16.72	A	B	B	A	B	B	A	A	A	A	A	A	A	B	B	A	A	A	A	B	A	B	A	B	B	B	A	N	A	A	B	A	A	B	A	B	A	B	B	A	A	A	A	A	B	B	B
S2_2668676	2	16.84	A	B	B	A	B	N	A	A	A	A	A	A	A	B	B	A	A	A	A	B	A	B	A	B	B	B	A	A	A	A	B	A	A	B	A	B	A	B	B	A	A	A	A	A	B	B	B
S2_2668692	2	16.84001	A	B	B	A	B	N	A	A	A	A	A	A	A	B	B	A	A	A	A	B	A	B	A	B	B	B	A	A	A	A	B	A	A	B	A	B	A	B	B	A	A	A	A	A	B	B	B
S2_2783451	2	17.78	A	B	B	A	B	B	A	A	A	A	A	A	A	B	B	A	A	A	A	B	A	B	A	B	B	B	A	A	A	A	B	A	A	B	A	B	A	B	B	A	A	A	A	A	B	B	B
S2_2826504	2	18	A	B	B	A	B	B	A	A	A	A	N	A	A	B	N	N	A	A	N	B	A	B	A	B	B	B	A	A	A	A	N	A	A	B	A	B	A	B	B	A	A	A	N	A	B	B	B
S2_2838357	2	18.02	A	B	B	A	B	B	A	A	A	A	A	A	A	B	B	A	A	A	A	B	A	B	A	B	B	B	A	A	A	A	B	A	A	B	A	B	A	B	B	A	A	A	A	A	B	B	B
S2_2844111	2	18.02001	A	B	B	A	B	B	A	A	A	A	A	A	A	B	B	A	A	A	A	B	A	B	A	B	B	B	A	A	A	A	B	A	A	B	A	B	A	B	B	A	A	A	A	A	B	B	B
S2_2863656	2	18.31	A	B	B	A	B	B	A	A	A	A	A	A	A	B	B	A	A	A	A	B	A	B	A	B	B	B	A	A	A	A	B	A	A	B	A	B	A	B	B	A	A	A	A	A	B	B	B
S2_2864003	2	18.31001	A	B	N	A	B	B	A	A	N	N	A	A	A	B	B	A	A	A	A	B	A	B	A	B	B	B	A	A	A	A	B	A	A	B	A	B	A	B	B	A	A	A	A	A	B	B	B
S2_2881463	2	18.36	A	B	B	A	B	B	A	A	A	A	A	A	A	B	B	A	A	A	A	B	A	B	A	B	B	B	A	A	A	A	B	A	A	B	A	B	A	B	B	A	A	A	A	A	B	B	B
S2_2905206	2	18.54	A	B	B	A	B	B	A	A	A	A	A	A	A	B	B	A	A	A	A	B	A	B	A	B	B	B	A	A	A	A	B	A	A	B	A	B	A	B	B	A	A	A	A	A	B	B	B
S2_2938688	2	18.75	N	B	B	A	B	B	A	A	A	A	A	A	A	B	B	A	A	A	A	B	A	B	A	B	B	B	A	A	A	A	B	A	A	B	A	B	A	B	B	A	A	A	N	A	B	B	B
S2_2948359	2	18.8	A	B	B	A	B	B	A	A	A	A	A	A	A	B	B	A	A	A	A	B	A	B	A	B	B	B	A	A	A	H	B	A	A	B	A	B	A	B	B	A	A	A	A	A	B	B	B
S2_2948368	2	18.80001	A	B	B	A	B	B	A	A	A	A	A	A	A	B	B	A	A	A	A	B	A	B	A	B	B	B	A	A	A	H	B	A	A	B	A	B	A	B	B	A	A	A	A	A	B	B	B
S2_2948526	2	18.80002	A	B	B	A	B	B	A	A	A	A	A	A	A	B	B	A	A	A	A	B	A	B	A	B	B	B	A	A	A	A	B	A	A	B	A	B	A	B	B	A	A	A	A	A	B	B	B
S2_2961842	2	18.80003	A	B	B	A	B	B	A	A	A	A	A	A	A	B	B	A	A	A	A	B	A	B	A	B	B	B	A	A	A	A	B	A	A	B	A	B	A	B	B	A	A	A	A	A	B	B	B
S2_2962071	2	18.80004	A	B	N	A	B	B	A	A	A	A	A	A	A	B	B	A	A	A	A	B	A	B	A	B	B	B	A	A	A	A	B	A	A	B	A	B	A	B	B	A	A	A	A	A	B	B	B
S2_2982164	2	18.80005	A	B	B	A	B	B	A	A	A	A	A	A	A	B	B	A	A	A	A	B	A	B	A	B	B	B	A	A	A	A	B	A	A	B	A	B	A	B	B	A	A	A	A	A	B	B	B
S2_2983906	2	18.80006	A	B	B	A	B	B	A	A	A	A	A	A	A	B	B	A	A	A	A	B	A	B	A	B	B	B	A	A	A	A	B	A	A	B	A	B	A	B	B	A	A	A	A	A	B	B	B
S2_2983934	2	18.80007	A	B	B	A	B	B	A	A	A	A	A	A	A	B	B	A	A	A	A	B	A	B	A	B	B	B	A	A	A	A	B	A	A	B	A	B	A	B	B	A	A	A	A	A	B	B	B
S2_3072644	2	19.79	A	B	B	A	B	B	A	A	A	A	A	A	A	B	B	A	A	A	A	B	A	B	A	B	B	B	A	A	A	A	B	A	A	B	A	B	A	B	B	A	A	A	A	A	B	B	B
S2_3072645	2	19.79001	A	B	B	A	B	B	A	A	A	A	A	A	A	B	B	A	A	A	A	B	A	B	A	B	B	B	A	A	A	A	B	A	A	B	A	B	A	B	B	A	A	A	A	A	B	B	B
S2_3072671	2	19.79002	A	B	B	A	B	B	A	A	A	A	A	A	A	B	B	A	A	A	A	B	A	B	A	B	B	B	A	A	A	A	B	A	A	B	A	B	A	B	B	A	A	A	A	A	B	B	B
S2_3072748	2	19.79003	A	B	B	A	B	B	A	A	A	A	A	A	A	B	B	A	A	A	A	B	A	B	A	B	B	B	A	A	A	A	B	A	A	B	A	B	A	B	B	A	A	A	A	A	B	B	B
S2_3093450	2	19.79004	A	B	B	A	B	B	A	A	A	A	A	A	A	B	B	A	N	A	A	B	A	B	A	B	B	B	A	N	A	A	B	A	A	B	A	B	A	B	B	A	A	A	A	A	B	B	B
S2_3094650	2	19.79005	A	B	B	A	B	B	A	A	A	A	A	A	A	B	B	A	A	A	A	N	A	B	A	B	B	B	A	A	A	A	B	A	N	B	A	B	A	B	B	A	A	A	A	A	B	B	B
S2_3094658	2	19.79006	A	B	B	A	B	B	A	A	A	A	A	A	A	B	B	A	A	A	A	N	A	B	A	B	B	B	A	A	A	A	B	A	N	B	A	B	A	B	B	A	A	A	A	A	B	B	B
S2_3094954	2	19.79007	A	B	B	A	B	B	A	A	A	A	A	A	A	B	B	A	A	A	A	B	A	B	A	B	B	B	A	A	A	A	B	A	A	B	A	B	A	B	B	A	A	A	A	A	B	B	B
S2_3094982	2	19.79008	A	B	B	A	B	B	A	A	A	A	A	A	A	B	B	A	A	A	A	B	A	B	A	B	B	B	A	A	A	A	B	A	A	B	A	B	A	B	B	A	A	A	A	A	B	B	B
S2_3126499	2	20.03	A	B	B	A	B	B	A	A	A	A	A	A	A	B	B	A	A	A	A	B	A	B	A	B	B	B	A	A	A	A	B	A	A	B	A	B	A	B	B	A	A	A	A	A	B	B	B
S2_3126572	2	20.03001	A	B	B	A	B	B	A	A	A	A	A	A	A	B	B	A	A	A	A	B	A	B	A	B	B	B	A	A	A	A	B	A	A	B	A	B	A	B	B	A	A	A	A	A	B	B	B
S2_3129778	2	20.03002	A	B	B	A	B	B	A	A	A	A	A	A	A	B	B	A	A	A	N	B	A	B	A	B	B	B	A	A	A	A	B	A	A	B	A	B	A	N	B	A	A	A	A	A	B	B	B
S2_3837903	2	28.42	A	B	B	A	A	B	A	A	H	A	A	A	A	B	B	A	B	A	B	B	A	B	A	B	B	A	A	A	A	A	B	A	A	B	A	B	A	B	B	A	A	B	A	A	B	B	B
S2_3843415	2	28.48	A	B	B	A	A	B	A	A	H	A	A	A	A	B	B	A	B	A	B	B	A	B	A	B	B	A	A	A	A	A	B	A	A	B	A	B	A	B	B	A	A	B	A	A	B	B	B
S2_3848316	2	28.54	A	B	B	A	A	B	A	A	B	A	A	A	A	B	B	A	B	A	B	B	A	B	A	B	B	A	A	A	A	A	B	A	A	B	A	B	A	B	N	A	A	B	N	A	B	B	B
S2_3873746	2	28.8	A	B	B	A	A	B	A	A	H	A	A	A	A	B	B	A	B	A	B	B	A	B	A	B	B	A	A	A	A	A	B	A	A	B	A	B	A	B	B	A	A	B	A	A	B	B	B
S2_3873759	2	28.80001	A	B	B	A	A	B	A	A	H	A	A	A	A	B	B	A	B	A	B	B	A	B	A	B	B	A	A	A	A	A	B	A	A	B	A	B	A	B	B	A	A	B	A	A	B	B	B
S2_3894597	2	28.81	A	B	B	A	A	B	A	A	A	A	A	A	A	N	B	A	B	A	B	B	A	B	A	B	B	A	A	A	A	A	N	A	A	B	A	B	A	B	B	A	A	B	A	A	B	B	N
S2_3897314	2	28.81001	A	B	B	A	A	B	A	A	H	A	A	A	A	B	B	A	B	A	B	B	A	B	A	B	B	A	A	A	A	A	B	A	A	B	A	B	A	B	B	A	A	B	A	A	B	B	B
S2_3909642	2	29.23	A	B	B	A	A	B	A	A	H	A	A	A	A	B	B	A	B	A	B	B	A	B	A	B	B	A	A	A	A	A	B	A	A	B	A	B	A	B	B	A	A	B	A	A	B	B	B
S2_4009532	2	30.05	A	B	B	A	A	B	A	A	H	A	N	A	A	B	B	A	B	H	B	B	A	B	A	B	B	A	A	A	A	A	B	A	A	B	A	B	A	B	B	A	A	B	A	A	B	B	B
S2_4013732	2	30.1	A	B	B	A	A	B	A	A	H	A	A	A	A	B	B	A	B	A	B	B	A	B	A	B	B	A	A	A	A	A	B	A	A	B	A	B	A	B	B	A	A	B	A	A	B	B	B
S2_4026219	2	30.19	A	B	B	A	A	B	A	A	H	A	A	A	A	B	B	A	B	A	B	B	A	N	A	B	B	A	A	A	A	A	B	A	A	N	A	B	A	N	B	N	A	B	A	N	B	B	N
S2_4036502	2	30.33	A	B	B	A	A	B	A	A	H	A	A	A	A	B	N	A	B	A	B	B	A	B	A	B	B	A	A	A	A	A	B	A	A	B	A	B	A	B	B	A	A	B	A	A	B	B	B
S2_4041906	2	30.33001	A	B	B	A	A	B	A	A	H	A	A	A	A	B	B	A	B	A	B	B	A	B	A	B	B	A	A	A	A	A	B	A	A	B	A	B	A	B	B	A	A	B	A	A	B	B	B
S2_4053732	2	30.64	A	B	B	A	A	B	A	A	H	A	A	A	A	B	B	A	B	A	B	B	A	B	A	B	B	A	A	A	A	A	B	A	A	B	A	B	A	B	B	A	A	B	A	A	B	B	B
S2_4053733	2	30.64001	A	B	B	A	A	B	A	A	H	A	A	A	A	B	B	A	B	A	B	B	A	B	A	B	B	A	A	A	A	A	B	A	A	B	A	B	A	B	B	A	A	B	A	A	B	B	B
S2_4352586	2	33.82	A	B	A	B	A	B	A	A	H	H	A	A	A	B	B	A	B	A	B	A	A	B	A	B	B	A	A	A	A	A	B	A	A	B	A	B	A	B	A	A	A	B	A	A	B	B	B
S2_4352646	2	33.82001	A	B	A	B	A	B	A	A	A	H	A	A	A	B	B	A	B	A	B	A	A	B	A	B	B	A	A	A	A	A	B	A	A	B	A	B	A	B	A	A	A	B	A	A	B	B	B
S2_4362253	2	33.85	A	B	A	B	A	B	A	A	H	H	A	A	A	B	B	A	B	A	B	A	A	B	A	B	B	A	A	A	A	A	B	A	A	B	A	B	A	B	A	A	A	B	A	A	B	B	B
S2_4390318	2	33.99	A	B	A	B	A	B	A	A	H	H	A	A	A	B	B	A	B	A	B	A	A	B	A	B	B	A	A	A	A	A	B	A	A	B	A	B	A	B	A	A	A	B	A	A	B	B	B
S2_4408126	2	34.03	A	B	A	B	A	B	A	A	H	H	A	A	A	B	B	A	B	A	B	A	A	B	A	B	B	A	A	A	A	A	B	A	A	B	A	B	A	B	A	A	A	B	A	A	B	B	B
S2_4414734	2	34.05	A	B	N	B	A	B	A	A	B	H	A	A	A	B	B	A	B	A	B	A	A	B	A	B	B	A	N	A	A	A	B	A	A	B	A	N	A	B	A	A	A	B	A	N	B	B	B
S2_4524336	2	34.26	A	B	A	B	A	B	A	A	H	H	A	A	A	B	B	A	B	A	B	A	A	B	A	B	B	A	A	A	A	A	B	A	A	B	A	B	A	B	A	A	A	B	A	A	B	B	B
S2_4553565	2	34.42	A	B	A	B	A	B	A	A	H	H	A	A	A	B	B	A	B	A	B	A	A	B	A	B	B	A	A	A	A	A	B	A	A	B	A	B	A	B	A	A	A	B	A	A	B	B	B
S2_4785570	2	37.14	A	B	B	B	A	B	A	A	H	A	A	A	A	B	B	A	B	A	B	B	A	B	A	B	A	A	A	A	A	A	B	A	A	B	A	B	A	B	A	N	A	B	A	A	B	B	B
S2_4816932	2	37.46001	A	B	B	B	A	B	A	A	H	A	A	A	A	B	B	A	B	A	B	B	A	B	A	B	A	A	A	A	A	A	B	A	A	B	A	B	A	B	A	A	A	B	A	A	B	B	B
S2_4868450	2	37.92	A	B	B	B	A	B	A	A	B	A	A	A	A	B	B	A	B	A	B	B	A	B	A	B	A	A	A	A	A	A	B	A	A	B	A	B	A	B	A	A	A	B	A	A	B	B	B
S2_5662715	2	43.57	A	B	B	B	A	B	A	A	A	A	A	A	A	A	A	B	B	B	B	B	A	B	B	B	A	A	B	A	A	A	B	A	A	B	A	B	A	B	A	B	H	B	A	A	B	B	B
S2_5726446	2	44.05	A	B	B	B	A	B	A	A	A	A	A	A	A	A	A	B	B	B	B	B	A	B	B	B	A	A	B	A	A	A	B	A	A	B	A	B	A	B	A	B	H	B	A	A	B	B	B
S2_5737044	2	44.43	A	B	B	B	A	B	A	A	A	A	A	A	A	A	A	B	B	B	B	B	A	B	B	B	A	A	B	A	A	A	B	A	A	B	A	B	A	B	A	B	H	B	A	A	B	B	B
S2_5737082	2	44.43002	A	B	B	B	A	B	A	A	A	A	A	A	A	A	A	B	B	B	B	B	A	B	B	B	A	A	B	A	A	A	B	A	A	B	A	B	A	B	A	B	H	B	A	A	B	B	B
S2_5776628	2	44.43003	N	B	B	B	A	B	A	A	A	A	A	A	A	A	A	B	B	B	B	B	A	B	B	B	A	A	B	A	A	A	B	A	A	B	A	B	A	B	A	B	H	B	A	A	B	B	B
S2_5800279	2	44.6	A	B	B	B	A	B	A	A	A	A	A	A	A	A	A	B	B	B	B	B	A	B	B	B	A	A	B	A	A	A	B	A	A	B	A	B	A	B	A	B	H	B	A	A	B	B	B
S2_5831684	2	44.64	A	B	B	B	A	B	A	A	A	A	A	A	A	A	A	B	B	B	B	B	A	B	B	B	A	A	B	A	B	A	B	A	A	B	A	B	A	B	A	B	H	B	A	A	B	B	B
S2_5964819	2	45.96	A	B	B	B	A	B	A	A	A	A	A	A	A	A	A	B	B	B	B	B	A	B	B	B	A	A	B	A	B	A	B	A	A	B	A	B	A	B	B	H	H	B	A	H	B	B	B
S2_6114941	2	46.24	A	B	B	B	A	B	A	A	A	A	A	A	A	A	A	B	B	B	B	B	A	B	B	B	A	A	B	A	B	A	B	A	A	B	A	B	A	B	B	B	H	B	A	H	B	B	B
S2_6205496	2	46.68	A	B	B	B	A	B	A	A	A	A	A	A	B	A	A	B	B	B	B	B	A	B	B	B	A	A	B	A	B	A	B	A	A	B	A	B	A	B	B	B	H	B	A	H	B	B	B
S2_6205498	2	46.68001	A	B	B	B	A	B	A	A	A	A	A	A	B	A	A	B	B	B	B	B	A	B	B	B	A	A	B	A	B	A	B	A	A	B	A	B	A	B	B	B	H	B	A	H	B	B	B
S2_6205505	2	46.68002	A	B	B	B	A	B	A	A	A	A	A	A	B	A	A	B	B	B	B	B	A	B	B	B	A	A	B	A	B	A	B	A	A	B	A	B	A	B	B	B	H	B	A	H	B	B	B
S2_6208403	2	46.68003	A	B	B	B	A	B	A	A	A	A	A	A	B	A	A	B	B	B	B	B	A	B	B	B	A	A	B	A	B	A	B	A	A	B	A	B	A	B	B	B	H	B	A	H	B	B	B
S2_6208407	2	46.68004	A	B	B	B	A	B	A	A	A	A	A	A	B	A	A	B	B	B	B	B	A	B	B	B	A	A	B	A	B	A	B	A	A	B	A	B	A	B	B	B	H	B	A	H	B	B	B
S2_6208435	2	46.68005	A	B	B	B	A	B	A	A	A	A	A	A	B	A	A	B	B	B	B	B	A	B	B	B	A	A	B	A	B	A	B	A	A	B	A	B	A	B	B	B	H	B	A	H	B	B	B
S2_6559608	2	48.01	A	B	B	B	A	B	A	A	A	A	A	A	B	A	A	B	B	B	B	B	A	B	B	B	A	A	B	A	B	A	B	A	A	B	A	B	A	B	B	B	H	B	A	H	B	B	B
S2_6566420	2	48.07	A	B	B	B	A	B	A	A	A	A	A	A	B	A	A	B	B	B	B	B	A	B	B	B	A	A	B	A	B	A	B	A	A	B	A	B	A	B	B	B	H	B	A	H	B	B	B
S2_7042056	2	51.39	A	B	B	B	A	B	A	A	A	A	A	A	B	A	A	B	B	B	B	B	A	B	B	B	A	A	H	A	B	A	B	A	B	B	A	B	A	B	A	B	H	B	B	H	B	B	B
S2_7048080	2	51.4	A	B	B	B	A	B	A	A	A	A	A	A	B	A	A	B	B	B	B	B	A	B	B	B	A	A	B	A	B	A	B	A	B	B	A	B	A	B	A	B	H	B	B	H	B	B	B
S2_7048104	2	51.40001	A	B	B	B	A	B	A	A	A	A	A	A	B	A	A	B	B	B	B	B	A	B	B	B	A	A	B	A	B	A	B	A	B	B	A	B	A	B	A	B	H	B	B	H	B	B	B
S2_7184140	2	51.54	A	B	B	B	A	B	A	A	A	A	A	A	B	A	A	B	B	B	B	B	A	B	B	B	A	A	B	A	B	A	B	A	B	B	A	B	A	B	A	B	H	B	B	H	B	B	B
S2_7187498	2	51.54001	A	B	B	B	A	B	A	A	A	A	A	A	B	A	A	B	B	B	B	B	A	B	B	B	A	A	B	A	B	A	B	A	B	B	A	B	A	B	A	B	H	B	B	H	B	B	B
S2_7221617	2	51.59	A	B	B	B	A	B	A	A	A	A	A	A	B	A	A	B	B	B	B	B	A	B	B	B	A	A	B	A	B	A	B	A	B	B	A	B	A	B	A	B	H	B	B	H	B	B	B
S2_7556118	2	53.51	A	B	B	B	A	B	A	A	A	B	A	A	B	A	A	B	B	B	B	B	A	B	B	B	A	A	B	A	B	A	B	A	B	B	A	B	A	B	A	A	H	B	B	H	B	B	B
S2_7568742	2	53.51001	A	B	B	B	A	B	A	A	A	B	A	A	B	A	A	B	B	B	B	B	A	B	B	B	A	A	B	A	B	A	B	A	B	B	A	B	A	B	A	A	H	B	B	H	B	B	B
S2_7582434	2	53.54	A	B	B	B	A	B	A	A	A	B	A	A	B	A	A	B	B	B	B	B	A	B	B	B	A	A	B	A	B	A	B	A	B	B	A	B	A	B	A	A	H	B	B	H	B	B	B
S2_7582448	2	53.54001	A	B	B	B	A	B	A	A	A	B	A	A	B	A	A	B	B	B	B	B	A	B	B	B	A	A	B	A	B	A	B	A	B	B	A	B	A	B	A	A	H	B	B	H	B	B	B
S2_7612891	2	53.56	A	B	B	B	A	B	A	A	A	B	A	A	B	A	A	B	B	B	B	B	A	B	B	B	A	A	B	A	B	A	B	A	B	B	A	B	A	B	A	A	H	B	B	H	B	B	B
S2_7614318	2	53.57	A	B	B	B	A	B	A	A	A	B	A	A	B	A	A	B	B	B	B	B	A	B	B	B	A	A	B	A	B	A	B	A	B	B	A	B	A	B	A	A	H	B	B	H	B	B	B
S2_8132010	2	54.08	A	B	B	H	A	B	A	A	A	B	A	A	B	A	A	B	A	B	B	B	A	B	B	B	A	A	B	A	B	A	B	A	B	B	A	B	A	B	A	A	H	B	B	H	B	B	B
S2_8213274	2	54.13	A	B	B	H	A	B	A	A	A	B	A	A	B	A	A	B	A	B	B	B	A	B	B	B	A	A	B	A	B	A	B	A	B	B	A	B	A	B	A	A	H	B	B	H	B	B	B
S2_8229298	2	54.13001	A	B	B	H	A	B	A	A	A	B	A	A	B	A	A	B	A	B	B	B	A	B	B	B	A	A	B	A	B	A	B	A	B	B	A	N	A	B	A	A	H	B	B	H	B	B	B
S2_8359046	2	54.32	A	B	B	H	A	B	A	A	A	B	A	B	H	A	A	B	A	B	B	B	A	B	B	B	A	A	B	A	B	A	B	A	B	B	A	B	A	B	A	A	H	B	B	H	B	B	B
S2_8367670	2	54.32001	A	B	B	H	A	B	A	A	A	B	A	B	H	A	A	B	A	B	B	B	A	B	B	B	A	A	B	A	B	A	B	A	B	B	A	B	A	B	A	A	H	B	B	H	B	B	B
S2_8375427	2	54.35	A	B	B	H	A	B	A	A	A	B	A	B	H	A	A	B	A	B	B	B	A	B	B	B	A	A	B	A	B	A	B	A	B	B	A	B	A	B	A	A	H	B	B	H	B	B	B
S2_8380998	2	54.35001	A	B	B	H	A	B	A	A	A	B	A	B	H	A	A	B	A	B	B	B	A	B	B	B	A	A	B	A	B	A	B	A	B	B	A	B	A	B	A	A	H	B	B	H	B	B	B
S2_8395912	2	54.37	A	B	B	H	A	B	A	A	A	B	A	B	H	A	A	B	A	B	B	B	A	B	B	B	A	A	B	A	B	A	B	A	B	B	A	B	A	B	A	A	H	B	B	H	B	B	B
S2_8395933	2	54.37001	A	B	B	H	A	B	A	A	A	B	A	B	H	A	A	B	A	B	B	B	A	B	B	B	A	A	B	A	B	A	B	A	B	B	A	B	A	B	A	A	H	B	B	H	B	B	B
S2_8395951	2	54.37002	A	B	B	H	A	B	A	A	A	B	A	B	H	A	A	B	A	B	B	B	A	B	B	B	A	A	B	A	B	A	B	A	B	B	A	B	A	B	A	A	H	B	B	H	B	B	B
S2_8398109	2	54.37003	A	N	B	A	A	B	A	A	A	B	A	B	A	A	A	B	A	B	B	B	A	B	B	B	A	A	B	A	B	A	B	A	B	B	A	B	A	B	A	A	A	H	B	A	B	B	B
S2_8398117	2	54.37004	A	N	B	A	A	B	A	A	A	B	A	B	A	A	A	B	A	B	B	B	A	B	B	B	A	A	B	A	B	A	B	A	B	B	A	B	A	B	A	A	A	H	B	A	B	B	B
S2_8398118	2	54.37005	A	N	B	A	A	B	A	A	A	B	A	B	A	A	A	B	A	B	B	B	A	B	B	B	A	A	B	A	B	A	B	A	B	B	A	B	A	B	A	A	A	H	B	A	B	B	B
S2_8398226	2	54.37006	A	B	B	H	A	B	A	H	A	B	A	B	H	A	A	B	A	B	B	B	A	B	B	B	A	A	B	A	B	A	B	A	B	B	A	B	A	B	A	A	H	B	B	H	B	B	B
S2_8398236	2	54.37007	A	B	B	H	A	B	A	A	A	B	A	B	H	A	A	B	A	B	B	B	A	B	B	B	A	A	B	A	B	A	B	A	B	B	A	B	A	B	A	A	H	B	B	H	B	B	B
S2_8399230	2	54.38	A	B	B	H	A	B	A	A	A	B	A	B	H	A	A	B	A	B	B	B	A	B	B	B	A	A	B	A	B	A	B	A	B	B	A	B	A	B	A	A	H	B	B	H	B	B	B
S2_8399236	2	54.38001	A	B	B	H	A	B	A	A	A	B	A	B	H	A	A	B	A	B	B	B	A	B	B	B	A	A	B	A	B	A	B	A	B	B	A	B	A	B	A	A	H	B	B	H	B	B	B
S2_8405421	2	54.39	A	B	B	H	A	B	A	A	A	B	A	B	H	A	A	B	A	B	B	B	A	B	B	B	A	A	B	A	B	A	B	A	B	B	A	B	A	B	A	A	H	B	B	H	B	B	B
S2_8405436	2	54.39001	A	B	B	H	A	B	A	A	A	B	A	B	H	A	A	B	A	B	B	B	A	B	B	B	A	A	B	A	B	A	B	A	B	B	A	B	A	B	A	A	H	B	B	H	B	B	B
S2_8405452	2	54.39002	A	B	B	H	A	B	A	A	A	B	A	B	H	A	A	B	A	B	B	B	A	B	B	B	A	A	B	A	B	A	B	A	B	B	A	B	A	B	A	A	H	B	B	H	B	B	B
S2_8405998	2	54.39003	A	B	B	H	A	B	A	A	A	B	A	B	H	A	A	B	A	B	B	B	A	B	B	B	A	A	B	A	B	A	B	A	B	B	A	B	A	B	A	A	H	B	B	H	B	B	B
S2_8406156	2	54.39004	N	B	B	H	A	B	A	A	A	B	A	B	H	A	A	B	A	B	B	B	A	B	B	B	A	A	B	A	B	A	B	A	B	B	A	B	A	B	A	A	A	B	B	H	N	B	B
S2_8406168	2	54.39005	N	B	B	H	A	B	A	A	A	B	A	B	H	A	A	B	A	B	B	B	A	B	B	B	A	A	B	A	B	A	B	A	B	B	A	B	A	B	A	A	A	B	B	H	N	B	B
S2_8411586	2	54.39006	A	B	B	H	A	B	A	A	A	B	A	B	H	A	A	B	A	B	B	B	A	B	B	B	A	A	B	A	B	A	B	A	B	B	A	B	A	B	A	A	H	B	B	H	B	B	B
S2_8411853	2	54.39007	A	B	B	H	A	B	A	A	A	B	A	B	H	A	A	B	A	B	B	B	A	B	B	B	A	A	B	A	B	A	B	A	B	B	A	B	A	B	A	A	A	B	B	H	B	B	B
S2_8421676	2	54.42	A	B	B	H	A	B	A	A	A	B	A	B	H	A	A	B	A	B	B	B	A	B	B	B	A	A	B	A	B	A	B	A	B	B	A	N	A	B	A	A	A	B	B	H	B	B	B
S2_8455503	2	54.44	A	B	B	H	A	B	A	A	A	B	A	B	H	A	A	B	A	B	B	B	A	B	B	B	A	A	B	A	B	A	B	A	B	B	A	B	A	B	A	A	H	B	B	H	B	B	B
S2_8471327	2	54.44001	A	B	B	H	A	B	A	A	A	B	A	B	N	A	A	B	A	B	B	B	A	B	B	B	A	A	B	A	B	A	B	A	B	B	A	N	A	B	A	A	H	B	B	H	B	B	B
S2_8531782	2	54.49	A	B	B	H	A	B	A	A	A	B	A	B	H	A	A	B	A	B	B	B	A	B	B	B	A	A	B	A	B	A	B	A	B	B	A	B	A	B	A	A	H	B	B	H	B	B	B
S2_8531784	2	54.49001	A	B	B	H	A	B	A	A	A	B	A	B	H	A	A	B	A	B	B	B	A	B	B	B	A	A	B	A	B	A	B	A	B	B	A	B	A	B	A	A	H	B	B	H	B	B	B
S2_8539485	2	54.49002	A	B	B	H	A	B	A	A	A	B	A	B	A	A	A	B	A	B	B	B	A	B	B	B	A	A	B	A	B	A	B	A	B	B	A	B	A	B	A	A	H	B	B	H	B	B	B
S2_8583785	2	54.56	A	B	B	H	A	B	A	A	A	B	A	B	H	A	A	B	A	B	B	B	A	B	B	B	A	A	B	A	B	A	B	A	B	B	A	B	A	B	A	A	H	B	B	H	B	B	B
S2_8583890	2	54.56001	A	B	B	H	A	B	A	A	A	B	A	B	H	A	A	B	A	B	B	B	A	B	B	B	A	A	B	A	B	A	B	A	B	B	A	B	A	B	A	A	H	B	B	H	B	B	B
S2_8590971	2	54.56002	A	B	B	H	A	B	A	A	A	B	A	B	H	A	A	B	A	B	B	B	A	B	B	B	A	A	B	A	B	A	B	A	B	B	A	B	A	B	A	A	H	B	B	H	B	B	B
S2_8591673	2	54.56003	A	B	B	H	A	B	A	A	A	B	A	B	H	A	A	B	A	B	B	B	A	B	B	B	A	A	B	A	B	A	B	A	B	B	A	B	A	B	A	A	H	B	B	H	B	B	B
S2_8697541	2	54.67	A	B	B	H	A	B	A	A	A	B	A	B	H	A	A	B	A	B	B	B	A	B	B	B	A	A	B	A	B	A	B	A	B	B	A	B	A	B	A	A	B	B	B	H	B	B	B
S2_8712246	2	54.67001	A	B	B	H	A	B	A	A	A	B	A	B	H	A	A	B	A	B	B	B	A	B	B	B	A	A	B	A	B	A	B	A	B	B	A	B	A	B	A	A	H	B	B	H	B	B	B
S2_8723418	2	54.67002	A	B	B	H	A	B	A	A	A	B	A	B	H	A	A	B	A	B	B	B	A	B	B	B	A	A	B	A	B	A	B	A	B	B	A	B	A	B	A	A	H	B	B	H	B	B	B
S2_8820855	2	55.1	A	B	B	A	A	B	A	A	A	B	A	B	H	A	A	B	A	B	B	B	A	B	B	B	A	A	B	A	B	A	B	A	B	B	A	N	A	B	A	A	A	B	B	H	B	B	B
S2_8820864	2	55.10001	A	B	B	A	A	B	A	A	A	B	A	B	H	A	A	B	A	B	B	B	A	B	B	B	A	A	B	A	B	A	B	A	B	B	A	N	A	B	A	A	A	B	B	H	B	B	B
S2_8820865	2	55.10002	A	B	B	A	A	B	A	A	A	B	A	B	H	A	A	B	A	B	B	B	A	B	B	B	A	A	B	A	B	A	B	A	B	B	A	N	A	B	A	A	A	B	B	H	B	B	B
S2_8820866	2	55.10003	A	B	B	A	A	B	A	A	A	B	A	B	H	A	A	B	A	B	B	B	A	B	B	B	A	A	B	A	B	A	B	A	B	B	A	N	A	B	A	A	A	B	B	H	B	B	B
S2_8820867	2	55.10004	A	B	B	A	A	B	A	A	A	B	A	B	H	A	A	B	A	B	B	B	A	B	B	B	A	A	B	A	B	A	B	A	B	B	A	N	A	B	A	A	A	B	B	H	B	B	B
S2_8820868	2	55.10005	A	B	B	A	A	B	A	A	A	B	A	B	H	A	A	B	A	B	B	B	A	B	B	B	A	A	B	A	B	A	B	A	B	B	A	N	A	B	A	A	A	B	B	H	B	B	B
S2_8820869	2	55.10006	A	B	B	A	A	B	A	A	A	B	A	B	H	A	A	B	A	B	B	B	A	B	B	B	A	A	B	A	B	A	B	A	B	B	A	N	A	B	A	A	A	B	B	H	B	B	B
S2_8820870	2	55.10007	A	B	B	A	A	B	A	A	A	B	A	B	H	A	A	B	A	B	B	B	A	B	B	B	A	A	B	A	B	A	B	A	B	B	A	N	A	B	A	A	A	B	B	H	B	B	B
S2_8834865	2	55.13	A	B	B	H	A	B	A	A	A	B	A	B	H	A	A	B	A	B	B	B	A	B	B	B	A	A	B	A	B	A	B	A	B	B	A	B	A	B	A	A	H	B	B	H	B	B	B
S2_8835112	2	55.13001	A	B	B	H	A	B	A	A	A	B	A	B	A	A	A	B	A	B	B	B	A	B	B	B	A	A	N	A	B	A	B	A	B	B	A	B	A	B	A	A	H	B	B	A	B	B	B
S2_8835140	2	55.13002	A	B	B	H	A	B	A	A	A	B	A	B	A	A	A	B	A	B	B	B	A	B	B	B	A	A	N	A	B	A	B	A	B	B	A	B	A	B	A	A	H	B	B	A	B	B	B
S2_8836803	2	55.13003	A	B	B	H	A	B	A	A	A	B	A	B	H	A	A	B	A	B	B	B	A	B	B	B	A	A	B	A	B	A	B	A	B	B	A	B	A	B	A	A	H	B	B	H	B	B	B
S2_8836819	2	55.13004	A	B	B	H	A	B	A	A	A	B	A	B	H	A	A	B	A	B	B	B	A	B	B	B	A	A	B	A	B	A	B	A	B	B	A	B	A	B	A	A	H	B	B	H	B	B	B
S2_8836974	2	55.13005	A	B	B	H	A	B	A	A	A	B	A	B	H	A	A	B	A	B	B	B	A	B	B	B	A	A	B	A	B	A	B	A	B	B	A	B	A	B	A	A	H	B	B	H	B	B	B
S2_8843095	2	55.19	A	B	B	H	A	B	A	A	A	B	A	B	H	A	A	B	A	B	B	B	A	B	B	B	A	A	B	A	B	A	B	A	B	B	A	B	A	B	A	A	H	B	B	H	B	B	B
S2_8843145	2	55.19001	A	B	B	H	A	B	A	A	A	B	A	B	H	A	A	B	A	B	B	B	A	B	B	B	A	A	B	A	B	A	B	A	B	B	A	B	A	B	A	A	H	B	B	H	B	B	B
S2_8854994	2	55.21	A	B	N	B	A	B	A	A	A	B	A	B	B	A	A	B	A	B	B	B	A	B	B	B	A	A	B	A	B	A	B	A	B	B	A	B	A	B	A	A	H	B	B	H	B	B	B
S2_8869316	2	55.21001	A	B	B	A	A	B	A	A	A	B	A	B	H	A	A	B	A	B	B	B	A	B	B	B	A	A	B	A	B	A	B	A	B	B	A	B	A	B	A	A	H	B	B	H	B	B	B
S2_8875781	2	55.46	N	B	B	H	A	B	A	A	A	B	A	B	H	A	A	B	A	B	B	B	A	B	B	B	A	A	B	A	B	A	B	A	B	B	A	B	A	B	A	A	B	B	B	H	B	B	B
S2_9885833	2	57.32	A	B	B	H	A	B	A	A	A	A	A	B	H	A	A	B	A	B	B	B	A	B	B	B	A	A	B	A	B	A	B	A	B	B	A	B	A	B	A	A	B	B	B	H	B	B	B
S2_9914322	2	57.37	A	B	B	H	A	B	A	A	A	A	A	B	H	A	A	B	A	B	B	A	A	B	B	B	A	A	B	A	B	A	B	A	B	B	A	B	A	B	A	A	B	B	A	H	B	B	B
S2_9936760	2	57.83	A	B	B	H	A	B	A	A	A	A	A	B	H	A	A	B	A	B	B	A	A	B	B	B	A	A	B	A	B	A	B	A	B	B	A	B	A	B	A	A	B	B	B	H	B	B	B
S2_9985769	2	58.64	A	B	B	H	A	B	A	A	A	A	A	B	H	A	A	B	A	B	B	A	A	B	B	B	A	A	B	A	B	A	B	A	B	B	A	B	A	B	A	A	B	B	A	H	B	B	B
S2_9985770	2	58.64001	A	B	B	H	A	B	A	A	A	A	A	B	H	A	A	B	A	B	B	A	A	B	B	B	A	A	B	A	B	A	B	A	B	B	A	B	A	B	A	A	B	B	A	H	B	B	B
S2_9985772	2	58.64002	A	B	B	H	A	B	A	A	A	A	A	B	H	A	A	B	A	B	B	A	A	B	B	B	A	A	B	A	B	A	B	A	B	B	A	B	A	B	A	A	B	B	A	H	B	B	B
S2_9985773	2	58.64003	A	B	B	H	A	B	A	A	A	A	A	B	H	A	A	B	A	B	B	A	A	B	B	B	A	A	B	A	B	A	B	A	B	B	A	B	A	B	A	A	B	B	A	H	B	B	B
S2_9985781	2	58.64004	A	B	B	H	A	B	A	A	A	A	A	B	H	A	A	B	A	B	B	A	A	B	B	B	A	A	B	A	B	A	B	A	B	B	A	B	A	B	A	A	B	B	A	H	B	B	B
S2_9985801	2	58.64005	A	B	B	H	A	B	A	A	A	A	A	B	H	A	A	B	A	B	B	A	A	B	B	B	A	A	B	A	B	A	B	A	B	B	A	B	A	B	A	A	B	B	A	H	B	B	B
S2_9990363	2	58.64006	A	B	B	H	A	B	A	A	A	A	A	B	H	A	A	B	A	B	B	A	A	B	B	B	A	A	B	A	B	A	B	A	B	B	A	B	A	B	A	A	B	B	A	H	B	B	B
S2_9990379	2	58.64007	A	B	B	H	A	B	A	A	A	A	A	B	H	A	A	B	A	B	B	A	A	B	B	B	A	A	B	A	B	A	B	A	B	B	A	B	A	B	A	A	B	B	A	H	B	B	B
S2_10004187	2	58.64008	A	B	B	H	A	B	A	A	A	A	A	B	A	A	A	B	A	B	B	A	A	B	B	B	A	A	B	A	B	A	B	A	B	B	A	B	A	B	A	A	B	B	A	H	B	B	B
S2_10075587	2	58.86002	A	B	B	H	A	B	N	A	A	A	A	B	H	A	A	B	A	B	B	A	A	B	B	B	A	A	N	A	B	A	B	A	B	B	A	B	A	B	A	A	B	B	A	H	B	B	B
S2_10083985	2	58.86003	A	B	B	H	A	B	A	A	A	A	A	B	H	A	A	B	A	B	B	A	A	B	B	B	A	A	B	A	B	A	B	A	B	B	A	B	A	B	A	A	B	B	A	H	B	B	B
S2_10084030	2	58.86004	A	B	B	H	A	B	A	A	A	A	A	B	H	A	A	B	A	B	B	A	A	B	B	B	A	A	B	A	B	A	B	A	B	B	A	B	A	B	A	A	B	B	A	H	B	B	B
S2_10129685	2	58.86005	A	B	B	H	A	B	A	A	A	A	A	B	H	A	A	B	A	B	B	A	A	B	B	B	A	A	B	A	B	A	B	A	B	B	A	B	A	B	A	A	B	B	A	H	B	B	B
S2_10129727	2	58.86006	A	B	B	H	A	B	A	A	A	A	A	B	H	A	A	B	A	B	B	A	A	B	B	B	A	A	B	A	B	A	B	A	B	B	A	B	A	B	A	A	B	B	A	H	B	B	B
S2_10130989	2	58.86007	A	B	B	H	A	B	A	A	A	A	A	B	H	A	A	B	A	B	B	A	A	B	B	B	A	A	B	A	B	A	B	A	B	B	A	B	A	B	A	A	B	B	A	H	B	B	B
S2_10134619	2	58.86008	A	B	B	H	A	B	A	A	A	A	A	B	H	A	A	B	A	B	B	A	A	B	B	B	A	A	B	A	B	A	B	A	B	B	A	B	A	B	A	A	B	B	A	H	B	B	B
S2_10134620	2	58.86009	A	B	B	H	A	B	A	A	A	A	A	B	H	A	A	B	A	B	B	A	A	B	B	B	A	A	B	A	B	A	B	A	B	B	A	B	A	B	A	A	B	B	A	H	B	B	B
S2_10135036	2	58.8601	A	B	B	H	A	B	A	A	A	A	A	B	A	A	N	B	A	B	B	A	A	N	B	B	A	A	B	A	B	A	B	A	B	B	A	B	A	B	A	A	B	B	A	H	B	B	B
S2_10143309	2	58.86011	A	B	B	H	A	B	A	A	A	A	A	B	H	A	A	B	A	B	B	A	A	B	B	B	A	A	B	A	B	A	B	A	B	B	A	B	A	B	A	A	B	B	A	H	B	B	B
S2_10164744	2	58.86012	A	B	B	H	A	B	A	A	A	A	A	B	H	A	A	B	A	B	B	A	A	B	B	B	A	A	B	A	B	A	B	A	B	B	A	B	A	B	A	A	B	B	A	H	B	B	B
S2_10197498	2	58.86013	A	B	B	B	A	B	N	A	A	A	N	B	H	A	A	B	A	B	B	A	A	B	B	B	A	A	B	A	N	A	A	N	B	B	A	B	A	B	A	A	B	B	A	B	B	B	B
S2_10205079	2	58.86014	A	B	B	H	A	B	A	A	A	A	A	B	H	A	A	B	A	B	B	A	A	B	B	B	A	A	B	A	B	A	A	A	B	B	A	B	A	B	A	A	B	B	A	A	B	B	N
S2_10205085	2	58.86015	A	B	B	H	A	B	A	A	A	A	A	B	H	A	A	B	A	B	B	A	A	B	B	B	A	A	B	A	B	A	A	A	B	B	A	B	A	B	A	A	B	B	A	A	B	B	N
S2_10213499	2	58.86016	A	B	B	H	A	B	A	A	A	A	A	B	B	A	A	B	A	B	B	A	A	B	B	B	A	A	B	A	B	A	A	A	B	B	A	B	A	B	A	A	B	B	A	H	B	B	B
S2_10359176	2	58.86017	A	B	B	H	A	B	A	A	A	A	A	B	H	A	A	B	A	B	B	A	A	B	B	B	A	A	B	A	B	A	A	A	B	B	A	B	A	B	A	A	B	B	A	H	B	B	B
S2_10359220	2	58.86018	A	B	B	H	A	B	A	A	A	A	A	B	H	A	A	B	A	B	B	A	A	B	B	B	A	A	B	A	B	A	A	A	B	B	A	B	A	B	A	A	B	B	A	A	B	B	B
S2_10361019	2	58.86019	A	B	B	H	A	B	A	A	A	A	A	B	H	A	A	B	A	B	B	A	A	B	B	B	A	A	B	A	B	A	A	A	B	B	A	B	A	B	A	A	B	B	A	H	B	B	B
S2_10369935	2	58.8602	A	H	B	H	A	B	A	A	A	A	A	B	H	A	A	B	A	B	B	A	A	B	B	B	A	N	B	A	B	A	A	A	B	B	A	B	A	B	A	A	B	B	A	H	B	B	B
S2_10380178	2	58.86021	A	N	B	N	A	B	A	A	A	A	A	B	N	A	A	B	A	B	B	A	A	B	B	B	A	A	N	A	B	A	A	A	B	B	A	N	A	B	A	A	B	B	A	A	B	B	B
S2_10503392	2	61.2	A	H	B	H	A	B	A	A	A	A	A	B	H	A	A	B	A	B	B	A	A	B	B	B	A	A	B	A	B	A	A	A	B	B	A	B	A	B	A	A	B	B	A	H	B	B	B
S2_10629175	2	61.20001	A	B	B	H	A	B	A	A	A	A	A	B	H	A	A	B	A	B	B	A	A	B	B	B	A	A	B	A	B	A	A	A	B	B	A	B	A	B	A	A	B	B	A	H	B	B	B
S2_10629225	2	61.20002	A	B	B	H	A	B	A	A	A	A	A	B	H	A	A	B	A	B	B	A	A	B	B	B	A	A	B	A	B	A	A	A	B	B	A	B	A	B	A	A	B	B	A	H	B	B	B
S2_10629393	2	61.20003	A	B	B	H	A	B	A	A	A	A	A	B	H	A	A	B	A	B	B	A	A	B	B	B	A	A	B	A	B	A	A	A	B	B	A	B	A	B	A	A	B	B	A	H	B	B	B
S2_10677979	2	61.20004	A	B	B	H	A	B	A	A	A	A	A	B	B	A	A	B	A	B	B	A	A	B	B	B	A	A	B	A	B	A	A	A	B	B	A	B	A	B	A	A	B	B	A	H	B	B	B
S2_10678018	2	61.20005	A	B	B	H	A	B	A	A	A	A	A	B	B	A	A	B	A	B	B	A	A	B	B	B	A	A	B	A	B	A	A	A	B	B	A	B	A	B	A	A	B	B	A	H	B	B	B
S2_10704783	2	61.20007	A	B	B	H	A	B	A	A	A	A	A	B	H	A	A	B	A	B	B	A	A	B	B	B	A	A	B	A	B	A	A	A	B	B	A	B	A	B	A	A	B	B	A	H	B	B	B
S2_10715440	2	61.20008	A	B	B	H	A	B	A	A	A	A	A	B	H	A	A	B	A	B	B	A	A	B	B	B	A	A	B	A	B	A	A	A	B	B	A	B	A	B	A	A	B	B	A	H	B	B	B
S2_10739527	2	61.20009	A	B	B	H	A	B	A	A	A	A	A	B	H	A	A	B	A	B	B	A	A	B	B	B	A	A	B	A	B	A	A	A	B	B	A	B	A	B	A	A	B	B	A	H	B	B	B
S2_10747331	2	61.2001	A	B	B	H	A	B	A	A	A	A	A	B	H	A	A	B	A	B	B	A	A	B	B	B	A	A	B	A	B	A	A	A	H	B	A	B	A	B	A	A	B	B	A	H	B	B	B
S2_10752985	2	61.20011	N	B	B	H	A	B	A	A	A	A	A	B	H	A	A	B	A	B	B	A	A	B	B	B	A	A	N	A	B	A	A	A	N	B	A	B	A	B	A	A	B	B	A	A	N	B	B
S2_10777891	2	61.20012	A	B	B	H	A	B	A	A	A	A	A	B	H	A	A	B	A	B	B	A	A	B	B	B	A	A	B	A	B	A	A	A	B	B	A	B	A	B	A	A	B	B	A	H	B	B	B
S2_10777894	2	61.20013	A	B	B	H	A	B	A	A	A	A	A	B	H	A	A	B	A	B	B	A	A	B	B	B	A	A	B	A	B	A	A	A	B	B	A	B	A	B	A	A	B	B	A	H	B	B	B
S2_10864666	2	61.20014	A	B	B	H	A	B	A	A	A	A	A	B	H	A	A	B	A	B	B	A	A	B	B	B	A	A	B	A	B	A	A	A	B	B	A	B	A	B	A	A	B	B	A	H	B	B	B
S2_10869238	2	61.20015	A	B	B	H	A	B	A	A	A	A	A	B	H	A	A	B	A	B	B	A	A	B	B	B	A	A	B	A	B	A	A	A	B	B	A	B	A	B	A	A	B	B	A	H	B	B	B
S2_10893749	2	61.20016	N	B	B	H	A	B	A	A	A	A	A	B	H	A	A	B	N	B	B	A	A	B	B	B	A	A	B	A	B	A	A	A	B	B	A	B	A	B	A	A	B	B	A	H	B	B	B
S2_10896711	2	61.20017	A	B	B	H	A	B	A	A	A	A	A	B	B	A	A	B	A	B	B	A	A	B	B	B	A	A	B	A	B	A	A	A	B	B	A	B	A	B	A	A	B	B	A	H	B	B	B
S2_10896743	2	61.20018	A	B	B	H	A	B	A	A	A	A	A	B	B	A	A	B	A	B	B	A	A	B	B	B	A	A	B	A	B	A	A	A	B	B	A	B	A	B	A	A	B	B	A	H	B	B	B
S2_10897809	2	61.20019	A	B	B	A	A	B	A	A	A	A	A	B	A	A	A	B	A	B	B	A	A	B	B	B	A	A	B	A	B	A	A	A	B	B	A	B	A	B	A	A	B	B	A	A	B	B	B
S2_10897812	2	61.2002	A	B	B	A	A	B	A	A	A	A	A	B	A	A	A	B	A	B	B	A	A	B	B	B	A	A	B	A	B	A	A	A	B	B	A	B	A	B	A	A	B	B	A	A	B	B	B
S2_10897814	2	61.20021	A	B	B	A	A	B	A	A	A	A	A	B	A	A	A	B	A	B	B	A	A	B	B	B	A	A	B	A	B	A	A	A	B	B	A	B	A	B	A	A	B	B	A	A	B	B	B
S2_10922749	2	61.20022	A	B	B	B	A	B	A	A	A	A	A	B	H	A	A	B	A	B	B	A	A	B	B	B	A	A	B	A	B	A	A	A	B	B	A	B	A	B	A	A	B	B	A	H	B	B	B
S2_10922753	2	61.20023	A	B	B	B	A	B	A	A	A	A	A	B	H	A	A	B	A	B	B	A	A	B	B	B	A	A	B	A	B	A	A	A	B	B	A	B	A	B	A	A	B	B	A	H	B	B	B
S2_10922756	2	61.20024	A	B	B	B	A	B	A	A	A	A	A	B	H	A	A	B	A	B	B	A	A	B	B	B	A	A	B	A	B	A	A	A	B	B	A	B	A	B	A	A	B	B	A	H	B	B	B
S2_10922783	2	61.20025	A	B	B	B	A	B	A	A	A	A	A	B	H	A	A	B	A	B	B	A	A	B	B	B	A	A	B	A	B	A	A	A	B	B	A	B	A	B	A	A	B	B	A	H	B	B	B
S2_10922903	2	61.20026	N	B	B	B	A	B	N	A	N	A	A	B	H	A	A	B	A	B	B	A	A	B	B	B	A	N	B	N	B	A	N	A	B	B	A	B	A	B	A	A	B	B	A	B	B	B	B
S2_10922945	2	61.20027	N	B	B	B	A	B	N	A	N	A	A	B	H	A	A	B	A	B	B	A	A	B	B	B	A	N	B	N	B	A	N	A	B	B	A	B	A	B	A	A	B	B	A	B	B	B	B
S2_10985501	2	62.88	A	B	B	H	A	B	A	A	A	A	A	B	H	A	A	B	A	B	B	A	A	B	B	B	A	A	B	A	B	A	A	A	B	B	A	B	A	B	A	A	B	B	A	B	B	B	B
S2_10985541	2	62.88001	A	B	B	H	A	B	A	A	A	A	A	B	H	A	A	B	A	B	B	A	A	B	B	B	A	A	B	A	B	A	A	A	B	B	A	B	A	B	A	A	B	B	A	H	B	B	B
S2_10985549	2	62.88002	A	B	B	H	A	B	A	A	A	A	A	B	H	A	A	B	A	B	B	A	A	B	B	B	A	A	B	A	B	A	A	A	B	B	A	B	A	B	A	A	B	B	A	H	B	B	B
S2_10996615	2	62.88003	A	B	B	H	A	B	A	A	A	A	A	B	H	A	A	B	A	B	B	A	A	B	B	B	A	A	B	A	B	A	A	A	B	B	A	B	A	B	A	A	B	B	A	H	B	B	B
S2_11000349	2	62.88004	N	B	B	H	A	B	A	A	A	A	A	B	H	A	A	B	A	B	B	A	A	B	B	B	A	A	B	A	B	A	A	A	B	B	A	B	A	B	A	A	B	B	A	H	B	B	B
S2_11004723	2	62.88005	A	B	B	H	A	B	A	A	A	A	A	B	H	A	A	B	A	B	N	A	A	B	B	B	A	A	B	A	B	A	A	A	B	B	A	B	A	B	A	A	B	B	A	A	B	B	B
S2_11004732	2	62.88006	A	B	B	H	A	B	A	A	A	A	A	B	H	A	A	B	A	B	N	A	A	B	B	B	A	A	B	A	B	A	A	A	B	B	A	B	A	B	A	A	B	B	A	A	B	B	B
S2_11004756	2	62.88007	A	B	B	H	A	B	A	A	A	A	A	B	H	A	A	B	A	B	N	A	A	B	B	B	A	A	B	A	B	A	A	A	B	B	A	B	A	B	A	A	B	B	A	A	B	B	B
S2_11004789	2	62.88008	A	B	B	H	A	B	A	A	A	A	A	B	H	A	A	B	A	B	B	A	A	B	B	B	A	A	B	A	B	A	A	A	B	B	A	B	A	B	A	A	B	B	A	H	B	B	B
S2_11017824	2	62.88009	A	B	B	H	A	B	A	A	A	A	A	B	H	A	A	B	A	B	B	A	A	B	B	B	A	A	B	A	B	A	A	A	B	B	A	B	A	B	A	A	B	B	A	H	B	B	B
S2_11017831	2	62.8801	A	B	B	H	A	B	A	A	A	A	A	B	H	A	A	B	A	B	B	A	A	B	B	B	A	A	B	A	B	A	A	A	B	B	A	B	A	B	A	A	B	B	A	H	B	B	B
S2_11017837	2	62.88011	A	B	B	H	A	B	A	A	A	A	A	B	H	A	A	B	A	B	B	A	A	B	B	B	A	A	B	A	B	A	A	A	B	B	A	B	A	B	A	A	B	B	A	H	B	B	B
S2_11017854	2	62.88012	A	B	B	H	A	B	A	A	A	A	A	B	H	A	A	B	A	B	B	A	A	B	B	B	A	A	B	A	B	A	A	A	B	B	A	B	A	B	A	A	B	B	A	H	B	B	B
S2_11071729	2	62.88013	A	B	B	H	A	B	A	A	A	A	A	B	H	A	A	B	A	B	B	A	A	B	B	B	A	A	B	A	B	A	A	A	B	B	A	B	A	B	A	A	B	B	A	H	B	B	B
S2_11073845	2	62.88014	A	B	B	H	A	B	A	A	A	A	A	B	H	A	A	B	A	B	B	A	A	B	B	B	A	A	B	A	B	A	A	A	B	B	A	B	A	B	A	A	B	B	A	H	B	B	B
S2_11102338	2	62.88015	A	B	B	H	A	B	A	A	A	A	A	B	H	A	A	B	A	B	B	A	A	B	B	B	A	A	B	A	B	A	A	A	B	B	A	B	A	B	A	A	B	B	A	H	B	B	B
S2_11707230	2	64.01	A	B	B	H	A	B	A	A	A	A	A	B	H	A	A	B	A	B	B	A	A	B	B	B	A	B	B	A	B	A	A	A	B	B	A	B	A	B	A	B	B	B	A	H	B	B	B
S2_17315960	2	68.79001	A	B	B	A	B	B	A	B	A	A	B	B	H	A	A	B	A	B	A	A	A	B	B	B	A	B	B	A	B	A	A	A	B	B	A	B	B	B	A	A	B	B	A	H	B	B	B
S2_17359387	2	68.86	A	B	B	A	B	B	A	B	A	A	B	B	H	A	A	B	A	B	A	A	A	B	B	B	A	B	B	A	B	A	A	A	B	B	A	B	B	B	H	A	B	B	A	H	B	B	B
S2_17428051	2	68.96	A	B	B	A	B	B	A	B	A	A	B	B	H	A	A	B	A	B	A	A	A	B	B	B	A	B	B	A	B	A	A	A	B	B	A	B	B	B	A	A	B	B	A	H	B	B	B
S2_17462182	2	68.96001	A	B	B	A	B	B	A	B	A	A	A	B	H	A	A	B	A	B	A	B	A	B	B	B	A	B	B	A	B	A	A	A	B	B	A	B	B	B	A	A	B	B	A	H	B	B	B
S2_17498935	2	68.98	A	B	B	A	B	B	A	B	A	A	A	B	H	A	A	B	A	B	A	B	A	B	B	B	A	B	B	A	B	A	A	A	B	B	A	B	B	B	A	A	B	B	A	H	B	B	B
S2_17499019	2	68.98001	A	B	B	A	B	B	A	B	A	A	A	B	H	A	A	B	A	B	A	B	A	B	B	B	A	B	B	A	B	A	A	A	B	B	A	B	B	B	A	A	B	B	A	H	B	B	B
S2_17499065	2	68.98002	A	B	B	A	B	B	A	B	A	A	A	B	H	A	A	B	A	B	A	B	A	B	B	B	A	B	B	A	B	A	A	A	B	B	A	B	B	B	A	A	B	B	A	H	B	B	B
S2_17514874	2	69.01	A	B	B	A	B	B	A	B	A	A	A	B	H	A	A	B	A	B	A	B	A	B	B	B	A	B	B	A	B	A	A	A	B	B	A	B	B	B	A	A	B	B	A	H	B	B	B
S2_17583562	2	69.04	A	B	B	A	B	B	A	B	A	A	A	B	B	A	A	B	A	B	A	B	A	B	B	B	A	B	B	A	B	A	A	A	B	B	A	B	B	B	A	A	B	B	A	H	B	B	B
S2_17583563	2	69.04001	A	B	B	A	B	B	A	B	A	A	A	B	B	A	A	B	A	B	A	B	A	B	B	B	A	B	B	A	B	A	A	A	B	B	A	B	B	B	A	A	B	B	A	H	B	B	B
S2_17583589	2	69.04002	A	B	B	A	B	B	A	B	A	A	A	B	H	A	A	B	A	B	A	B	A	B	B	B	A	B	B	A	B	A	A	A	B	B	A	B	B	B	A	A	B	B	A	H	B	B	B
S2_17611523	2	69.04003	A	B	B	A	B	B	A	B	A	A	A	B	H	A	A	B	A	B	A	B	A	B	B	B	A	B	B	A	B	A	A	A	B	B	A	B	B	B	A	A	B	B	A	A	B	B	B
S2_17790472	2	69.83	A	B	B	A	B	B	A	B	A	A	A	B	H	N	A	B	A	B	A	B	A	B	B	B	A	B	B	A	B	A	A	A	B	B	A	B	B	B	A	A	B	B	A	H	B	B	B
S2_17806312	2	69.83001	A	B	B	A	B	B	A	B	A	A	A	B	B	A	A	B	A	B	A	B	A	B	B	B	A	B	N	A	B	A	A	A	B	B	A	B	B	B	A	A	B	B	A	H	B	B	B
S2_17952454	2	70.03	A	B	B	A	B	B	A	B	A	A	A	B	H	A	A	B	A	B	A	B	A	B	B	B	A	B	B	A	B	A	A	A	B	B	A	B	B	B	A	A	B	B	A	H	B	B	B
S2_18314168	2	72.28	A	B	B	A	B	B	A	B	A	A	A	B	H	A	A	B	A	B	A	B	A	B	B	B	A	B	B	A	B	A	A	A	B	B	A	B	B	B	A	A	B	B	A	A	B	B	B
S2_18359406	2	72.43	A	B	B	A	B	B	A	B	A	A	A	B	H	A	A	B	A	B	A	B	A	B	B	B	A	B	B	A	B	A	A	A	B	B	A	B	B	B	A	A	B	B	A	A	B	B	B
S2_18370044	2	72.46	A	B	B	A	B	B	A	B	A	A	A	B	H	A	A	B	A	B	A	B	A	B	B	B	A	B	B	A	B	A	A	A	N	B	A	B	B	B	A	A	B	B	A	A	B	B	B
S2_18379749	2	72.48	A	B	B	A	B	B	A	B	A	A	A	B	H	A	A	B	A	B	A	B	A	B	B	B	A	B	B	A	B	A	A	A	B	B	A	B	B	B	A	A	B	B	A	A	B	B	B
S2_18395590	2	72.52	A	B	B	A	B	B	A	B	A	A	A	B	H	A	A	B	A	B	A	B	A	B	B	B	A	B	B	A	B	A	A	A	B	B	A	B	B	B	A	A	B	B	A	A	B	B	B
S2_18490568	2	73.39	A	B	B	A	B	B	A	B	A	A	A	B	H	A	A	B	A	B	A	B	A	B	B	B	A	B	B	A	B	A	A	A	B	B	A	B	B	B	A	A	B	B	A	A	B	B	B
S2_18491024	2	73.39001	A	B	B	A	N	B	A	B	A	A	A	B	H	A	A	N	A	B	A	B	A	B	B	B	A	B	B	A	B	A	A	A	B	B	A	B	B	B	A	A	B	B	A	N	B	B	B
S2_18493398	2	73.39002	A	B	B	A	B	B	A	B	A	A	A	H	H	A	A	B	A	B	A	B	A	B	B	B	A	B	B	A	B	A	A	A	B	B	A	B	B	B	A	A	B	B	A	A	B	B	B
S2_18598545	2	74.4	A	B	B	A	B	B	A	B	B	A	A	B	H	A	A	B	A	B	A	B	A	B	B	B	A	B	B	A	B	A	A	A	B	B	A	B	B	B	A	A	B	B	A	A	B	B	B
S2_19208864	2	80.74	H	A	B	A	B	B	A	B	B	A	A	B	A	A	A	B	A	H	A	B	A	B	B	B	A	A	B	A	B	A	A	A	B	B	A	B	B	B	A	B	B	B	B	A	B	A	B
S2_20258450	2	88.33	H	A	B	A	A	B	A	B	B	A	A	B	A	A	A	B	B	B	A	B	A	B	B	B	B	A	A	A	A	A	A	A	B	B	A	N	B	B	A	N	A	B	B	A	B	A	B
S2_20359866	2	88.73	H	A	B	A	A	B	A	B	B	A	A	B	A	A	A	B	B	B	A	B	A	B	B	B	B	A	A	A	A	A	A	A	B	B	A	B	B	B	A	B	A	B	B	A	B	A	B
S2_20369074	2	89.05	H	A	B	A	A	B	A	B	B	A	A	B	A	A	A	B	B	B	A	B	A	B	B	B	B	A	A	A	A	A	A	A	B	B	A	B	B	B	A	B	A	B	B	A	B	A	B
S2_20369078	2	89.05001	H	A	B	A	A	B	A	B	B	A	A	B	A	A	A	B	B	B	A	B	A	B	B	B	B	A	A	A	A	A	A	A	B	B	A	B	B	B	A	B	A	B	B	A	B	A	B
S2_20390273	2	89.05002	H	A	B	A	A	B	A	B	B	A	A	B	A	A	A	B	B	B	A	B	A	B	B	B	B	A	A	A	A	A	A	A	B	B	A	B	B	B	A	B	A	B	B	A	B	A	B
S2_20531585	2	89.54	H	A	B	A	A	B	A	B	B	A	A	B	A	A	A	B	B	B	A	B	A	B	B	B	B	A	A	A	A	A	A	A	B	B	A	B	B	B	A	B	A	B	B	A	B	A	B
S2_20532422	2	89.54001	H	A	B	A	A	B	A	B	B	A	A	B	A	A	A	B	B	B	A	B	A	B	B	B	B	A	A	A	A	A	A	A	B	B	A	B	B	B	A	B	A	B	B	A	B	A	B
S2_21005324	2	93.25	B	A	B	A	A	B	A	B	A	B	A	A	A	A	A	B	B	B	A	B	A	B	B	B	B	A	H	A	B	A	A	A	A	A	A	B	B	B	A	B	A	B	B	A	B	A	B
S2_21005367	2	93.25001	B	A	B	A	A	B	A	B	A	B	A	A	A	A	A	B	B	B	A	B	A	B	B	B	B	A	H	A	B	A	A	A	A	A	A	B	B	B	A	B	A	B	B	A	B	A	B
S2_21015041	2	93.26	B	A	B	A	A	B	A	B	A	B	A	A	A	A	A	B	B	B	A	B	A	B	B	B	B	A	H	A	B	A	A	A	A	A	A	B	B	B	N	B	A	B	B	A	B	A	B
S2_21015458	2	93.26001	B	A	B	A	A	B	A	B	A	B	A	A	A	A	A	B	B	B	A	B	A	B	B	B	B	A	H	A	B	A	A	A	A	A	A	B	B	B	A	B	A	B	B	A	B	A	B
S2_21015478	2	93.26002	B	A	B	A	A	B	A	B	A	B	A	A	A	A	A	B	B	B	A	B	A	B	B	B	B	A	H	A	B	A	A	A	A	A	A	B	B	B	A	B	A	B	B	A	B	A	B
S2_21016123	2	93.26003	B	A	B	A	A	B	A	B	A	B	A	A	A	A	A	B	B	B	A	B	A	B	B	B	B	A	H	A	B	A	A	A	A	A	A	B	B	B	A	B	A	B	B	A	B	A	B
S2_21032960	2	93.29	B	A	B	A	A	B	A	B	A	B	A	A	A	A	A	B	B	B	A	B	A	B	B	B	B	A	H	A	B	A	A	A	A	A	A	B	B	B	A	B	A	B	B	A	B	A	B
S2_21032966	2	93.29001	B	A	B	A	A	B	A	B	A	B	A	A	A	A	A	B	B	B	A	B	A	B	B	B	B	A	H	A	B	A	A	A	A	A	A	B	B	B	A	B	A	B	B	A	B	A	B
S2_21037036	2	93.31	B	A	B	A	A	B	A	B	A	B	A	A	A	A	A	B	B	B	A	B	A	B	B	B	B	A	H	A	B	A	A	A	A	A	A	B	B	B	A	B	A	B	B	A	B	A	B
S2_21085045	2	93.4	B	A	B	A	A	B	A	B	A	B	A	A	A	A	A	B	B	B	A	B	A	B	A	B	B	A	H	A	B	A	A	A	A	A	A	B	B	B	A	B	A	B	B	A	B	A	B
S2_21103537	2	93.43	B	A	N	A	A	B	A	B	A	B	A	A	A	A	A	B	B	B	A	B	A	B	A	B	B	A	H	A	B	A	A	A	A	A	A	B	B	B	A	B	A	B	B	A	B	A	B
S2_21115473	2	93.45	B	A	B	A	A	B	A	B	A	B	A	A	A	A	A	B	B	B	A	B	A	B	A	B	B	A	H	A	B	A	A	A	A	A	A	H	B	B	A	B	A	B	B	A	B	A	B
S2_22070000	2	100.32	B	A	B	B	A	B	A	A	A	B	A	A	A	B	B	B	B	B	A	B	A	A	A	A	B	A	H	A	H	A	B	A	A	A	A	H	B	B	A	A	A	B	A	A	B	A	B
S2_22070111	2	100.32001	B	A	B	B	A	B	A	A	A	B	A	A	A	B	B	B	B	B	A	B	A	A	A	A	B	A	H	A	B	A	B	A	A	A	A	H	B	B	A	A	A	B	A	A	B	A	B
S2_22070132	2	100.32002	B	A	B	B	A	B	A	A	A	B	A	A	A	B	B	B	B	B	A	B	A	A	A	A	B	A	H	A	H	A	B	A	A	A	A	H	B	B	A	A	A	B	A	A	B	A	B
S2_22083124	2	100.5	B	N	B	B	A	B	A	A	A	B	A	A	A	B	B	B	B	B	A	B	A	A	A	A	B	A	H	A	H	A	B	A	A	A	A	H	B	B	A	A	A	B	A	A	B	A	B
S2_22142097	2	100.86	B	A	B	B	A	B	A	A	A	B	A	A	A	B	B	B	B	B	A	B	A	A	A	A	B	A	H	A	H	A	B	A	A	A	A	H	B	B	A	A	A	B	A	A	B	A	B
S2_22327406	2	102.5	B	A	B	N	A	B	A	A	A	B	A	A	A	B	B	B	B	B	A	B	A	A	A	A	B	A	H	A	A	A	B	A	B	A	A	A	B	B	A	A	A	B	A	A	B	A	B
S2_22350046	2	102.58	B	A	N	B	A	B	A	A	A	B	A	A	A	B	B	B	N	B	N	B	A	A	A	A	B	A	H	A	A	A	B	A	B	A	A	A	B	B	A	A	A	B	A	A	B	A	B
S2_22367295	2	102.63	B	A	B	B	A	B	A	A	A	B	A	A	A	B	B	B	B	B	A	B	A	A	A	A	B	A	H	A	A	A	B	A	B	A	A	A	B	B	A	A	A	B	A	A	B	A	B
S2_22391518	2	102.73	B	A	B	B	A	B	A	A	A	B	A	A	A	B	B	B	B	B	A	B	A	A	A	A	B	A	H	A	A	A	B	A	B	A	A	A	B	B	A	A	A	B	A	A	B	A	B
S2_23159475	2	107.16	B	A	B	B	A	B	A	A	A	A	A	A	A	B	B	H	B	B	A	B	A	A	A	A	A	A	A	A	A	A	B	A	B	A	A	A	A	A	A	A	H	B	A	A	B	B	B
S2_23700220	2	108.84	B	A	B	B	A	B	A	A	A	A	A	B	A	B	B	H	B	B	A	B	A	A	A	A	A	A	A	A	A	A	A	A	B	A	A	A	A	A	A	A	H	B	A	A	B	B	B
S2_23700247	2	108.84001	B	A	B	B	A	B	A	A	A	A	A	B	A	B	B	H	B	B	A	B	A	A	A	A	A	A	A	A	A	A	A	A	B	A	A	A	A	A	A	A	H	B	A	A	B	B	B
S2_23704037	2	108.89	B	N	B	B	A	B	A	A	A	A	A	B	A	B	B	H	B	B	A	B	A	A	N	A	A	A	A	N	A	A	A	A	B	N	A	A	A	A	A	A	A	B	A	A	B	B	B
S2_23705869	2	108.89001	B	A	B	B	A	B	A	A	A	A	A	B	A	B	B	H	B	B	A	B	A	A	A	A	A	A	A	A	A	A	A	A	B	A	A	A	A	A	A	A	H	B	A	A	B	B	B
S2_23705952	2	108.89002	B	A	B	B	A	B	A	A	A	A	A	B	A	B	B	H	B	B	A	B	A	A	A	A	A	A	A	A	A	A	A	A	B	A	A	A	A	A	A	A	H	B	A	A	B	B	B
S2_23706594	2	108.91	B	A	B	B	A	B	A	A	A	A	A	B	A	B	B	H	B	B	A	B	A	A	A	A	A	A	A	A	A	A	A	A	B	A	A	A	A	A	A	A	H	B	A	A	B	B	B
S2_23712160	2	108.99	B	A	B	B	A	B	A	A	A	A	A	B	A	B	B	H	B	B	A	B	A	A	A	A	A	A	A	A	A	A	A	A	B	A	A	A	A	A	A	A	H	B	A	A	B	B	B
S2_23826988	2	110.4	B	A	B	B	A	B	A	A	A	A	A	B	A	B	B	H	B	B	A	B	A	A	A	A	A	A	A	A	A	A	A	A	B	A	A	A	A	A	A	A	H	B	A	A	B	B	B
S2_23874962	2	110.75	B	A	B	B	A	B	A	A	A	A	A	B	A	B	B	H	B	B	A	B	H	A	A	A	A	A	A	A	A	A	A	A	B	A	A	A	A	A	A	A	H	B	A	A	B	B	B
S2_23893453	2	110.86	B	A	B	B	A	B	A	A	A	A	A	B	A	B	B	H	B	B	A	B	A	A	A	A	A	A	A	A	A	A	A	A	B	A	A	A	A	A	A	A	H	B	A	A	B	B	B
S2_23903134	2	110.88	B	A	B	B	A	B	A	A	A	A	A	B	A	B	B	H	B	B	A	B	A	A	A	A	A	A	A	A	A	A	A	A	B	A	A	A	A	A	A	A	H	B	A	A	B	B	B
S2_24006078	2	111.22	N	A	B	B	A	B	A	A	A	A	A	B	A	B	B	H	B	B	A	B	A	A	A	A	A	A	A	A	A	A	A	A	B	A	A	A	A	A	A	A	H	B	A	A	B	B	B
S2_24006081	2	111.22001	N	A	B	B	A	B	A	A	A	A	A	B	A	B	B	H	B	B	A	B	A	A	A	A	A	A	A	A	A	A	A	A	B	A	A	A	A	A	A	A	H	B	A	A	B	B	B
S2_24006215	2	111.22002	B	A	B	B	A	B	A	A	A	A	A	B	A	B	B	H	B	B	A	B	A	A	A	A	A	A	A	A	A	A	A	A	B	A	A	A	A	A	A	A	H	B	A	A	B	B	B
S2_24014874	2	111.22003	B	A	B	B	A	B	A	A	A	A	A	B	A	B	B	H	B	B	A	B	A	A	A	A	A	A	A	A	A	A	A	A	B	A	A	A	A	A	A	A	H	B	A	A	B	B	B
S2_24014931	2	111.22004	B	A	B	B	A	B	A	A	A	A	A	B	A	B	B	H	B	B	A	B	A	A	A	A	A	A	A	A	A	A	A	A	B	A	A	A	A	A	A	A	H	B	A	A	B	B	B
S2_24015069	2	111.22005	B	A	B	B	A	B	N	A	A	A	A	B	A	B	B	H	B	B	A	B	A	A	A	A	A	A	A	A	A	A	A	A	B	A	A	A	A	A	A	A	H	B	A	A	B	B	B
S2_24065346	2	111.36	B	A	B	B	A	B	A	A	A	A	A	B	A	B	B	H	B	B	A	B	A	A	A	A	A	A	A	A	A	A	A	A	B	A	A	A	A	A	A	A	H	B	A	A	B	B	B
S2_24099616	2	111.55	B	A	B	B	A	B	A	A	A	A	A	B	A	B	B	H	B	B	A	B	A	A	A	A	A	A	A	A	A	A	A	A	B	A	A	A	A	A	A	A	H	B	A	A	B	B	B
S2_24140385	2	111.7	B	A	B	B	A	B	A	A	A	A	A	B	A	B	B	H	B	B	A	B	A	A	A	A	A	A	A	A	A	A	A	A	B	A	A	A	A	A	A	A	H	B	A	A	B	B	B
S2_24152755	2	111.84	B	A	B	B	A	B	A	A	A	A	A	B	A	B	B	H	B	B	A	B	A	A	A	A	A	A	A	A	A	A	A	A	B	A	A	A	A	A	A	A	H	B	A	A	B	B	B
S2_24165508	2	111.84001	B	A	B	B	A	B	A	A	A	A	A	B	A	B	N	H	B	B	A	B	A	A	H	A	A	A	A	A	N	A	A	A	B	A	A	A	A	A	A	A	H	B	A	A	B	B	B
S2_24165656	2	111.84002	B	A	B	B	A	B	A	A	A	A	A	B	A	B	B	H	B	B	A	B	A	A	A	A	A	A	A	A	A	A	A	A	B	A	A	A	A	A	A	A	H	B	A	A	B	B	B
S2_24168273	2	111.84003	B	A	N	B	A	B	A	A	A	A	A	B	A	B	B	H	B	B	N	B	A	A	A	A	A	A	A	A	A	A	A	A	N	A	A	A	A	A	A	A	B	B	A	A	B	B	B
S2_24173031	2	111.84004	B	A	B	B	A	B	A	A	A	A	A	B	A	B	B	H	B	B	N	B	A	A	A	A	A	A	A	A	A	A	A	A	B	A	A	A	A	A	A	A	B	B	A	A	B	B	B
S2_24176454	2	111.84005	B	A	B	B	N	B	A	A	A	A	N	B	A	B	B	H	B	B	A	B	A	A	A	A	A	A	N	A	A	A	A	A	B	A	A	A	A	A	A	A	H	B	A	A	B	B	B
S2_24186338	2	111.88	B	A	N	B	A	B	A	A	A	A	A	B	A	B	B	H	B	B	A	B	A	A	A	A	A	A	N	A	A	A	A	A	B	A	A	A	A	A	A	A	H	B	A	A	N	B	B
S2_24210631	2	111.94	B	A	B	B	A	B	A	A	A	A	A	B	A	B	B	H	B	B	A	B	A	A	A	A	A	A	A	A	A	A	A	A	B	A	A	A	A	A	A	A	H	B	A	A	B	B	B
S2_24236356	2	112.06	B	A	B	B	A	B	A	A	A	A	A	B	A	B	B	H	B	B	A	B	A	A	A	B	A	A	A	A	A	A	A	A	B	A	A	A	A	A	A	A	H	B	A	A	B	B	B
S2_24251301	2	112.13	B	A	B	B	A	B	A	A	A	A	A	B	A	B	B	H	B	B	A	B	A	A	A	B	A	A	A	A	A	A	A	A	B	A	A	A	A	A	A	A	H	B	A	A	B	B	N
S2_24261906	2	112.13001	B	A	B	B	A	B	A	A	A	A	A	B	A	B	B	H	B	B	A	B	A	A	A	B	A	A	A	A	A	A	A	A	B	A	A	A	A	A	A	A	H	B	A	A	B	B	B
S2_24273499	2	112.37	B	A	B	B	A	B	A	A	A	A	A	B	A	B	B	H	B	B	A	B	A	A	A	B	A	A	A	A	A	A	A	A	B	A	A	A	A	A	A	A	H	B	A	A	B	B	B
S2_24278397	2	112.37002	B	A	B	B	A	B	A	A	A	A	A	B	A	B	B	H	B	B	A	B	A	A	A	B	A	A	A	A	A	A	A	A	B	A	A	A	A	A	A	A	H	B	A	A	B	B	B
S2_24278919	2	112.37003	B	A	B	B	A	B	A	A	A	A	A	B	A	B	B	H	B	B	A	B	A	A	A	B	A	A	A	A	A	A	A	H	B	A	A	A	A	A	A	A	H	B	A	A	B	B	B
S2_24278920	2	112.37004	B	A	B	B	A	B	A	A	A	A	A	B	A	B	B	H	B	B	A	B	A	A	A	B	A	A	A	A	A	A	A	H	B	A	A	A	A	A	A	A	H	B	A	A	B	B	B
S2_24278925	2	112.37005	B	A	B	B	A	B	A	A	A	A	A	B	A	B	B	H	B	B	A	B	A	A	A	B	A	A	A	A	A	A	A	H	B	A	A	A	A	A	A	A	H	B	A	A	B	B	B
S2_24283601	2	112.37006	B	A	B	B	A	B	A	A	A	A	A	B	A	B	B	H	B	B	A	B	A	A	A	B	A	A	A	A	A	A	A	A	B	A	A	A	A	A	A	A	H	B	A	A	B	B	B
S2_24477205	2	113.08	B	A	B	B	A	B	A	A	A	A	A	B	A	B	B	H	B	B	A	B	A	A	A	B	A	A	A	A	A	A	A	A	B	A	A	A	A	A	A	A	H	B	A	A	B	B	B
S2_24479575	2	113.08001	B	A	B	B	A	B	A	A	A	A	A	B	A	B	B	H	B	B	A	B	A	A	A	B	A	A	A	A	A	A	A	A	B	A	A	A	A	A	A	A	H	B	A	A	B	B	B
S2_24479605	2	113.08002	B	A	B	B	A	B	A	A	A	A	A	B	A	B	B	H	B	B	A	B	A	A	A	B	A	A	A	A	A	A	A	A	B	A	A	A	A	A	A	A	B	B	A	A	B	B	B
S2_24517436	2	113.22	B	A	B	B	A	B	A	A	A	A	A	B	A	B	B	H	B	B	A	B	A	A	A	B	A	A	A	A	A	A	A	A	B	A	A	A	A	A	A	A	H	B	A	A	B	B	B
S2_24530358	2	113.24	B	A	B	B	A	B	A	A	A	A	A	B	A	B	B	H	B	B	A	B	A	A	A	B	A	A	A	A	A	A	A	A	B	A	A	A	A	A	A	A	H	B	A	A	B	B	B
S2_24591850	2	113.68	B	A	B	B	A	B	A	A	A	A	A	B	A	B	B	H	B	B	A	B	A	A	A	B	A	A	A	A	A	A	A	A	B	A	A	A	A	A	A	A	H	B	A	A	B	B	B
S2_24646148	2	114	N	A	B	B	A	B	A	A	A	A	A	B	A	B	B	H	B	B	A	B	A	A	A	B	A	A	A	A	A	A	A	A	B	A	A	A	A	A	A	A	H	B	A	A	H	B	B
S2_24673887	2	114.4	B	A	B	B	A	B	A	A	A	A	A	B	A	B	B	H	B	B	A	B	A	A	A	B	A	A	A	A	A	A	A	A	B	A	A	A	A	A	A	A	H	B	A	A	B	B	B
S2_24680170	2	114.40001	B	A	B	B	A	B	A	A	A	A	A	B	A	B	B	H	B	B	A	B	A	A	A	B	A	A	A	A	A	A	A	A	B	A	A	A	A	A	A	A	H	B	A	A	B	B	B
S2_24686982	2	114.47	B	A	B	B	A	B	A	A	A	A	A	B	A	B	B	H	B	B	A	B	A	A	A	B	A	A	A	A	A	A	A	A	B	A	A	A	A	A	A	A	H	B	A	A	B	B	B
S2_24732752	2	114.59	B	A	B	B	A	B	A	A	A	A	A	B	A	B	B	H	B	B	A	B	A	A	A	B	A	A	A	A	A	A	A	A	B	A	A	A	A	A	A	A	H	B	A	A	B	B	B
S2_24752084	2	114.64	B	A	B	B	A	B	A	A	A	A	A	B	A	B	B	H	B	B	A	B	A	A	A	B	A	A	A	A	A	A	A	A	B	A	A	A	A	A	A	A	H	B	A	A	B	B	B
S2_24752133	2	114.64001	B	A	B	B	A	B	A	A	A	A	A	B	A	B	B	H	B	B	A	B	A	A	A	B	A	A	A	A	A	A	A	A	B	A	A	A	A	A	A	A	H	B	A	A	B	B	B
S2_24752173	2	114.64002	B	A	B	B	A	B	A	A	A	A	A	B	A	B	B	H	B	B	A	B	A	A	A	B	A	A	A	A	A	A	A	A	B	A	A	A	A	A	A	A	H	B	A	A	B	B	B
S2_24877658	2	115.81	B	A	B	B	A	B	A	A	A	A	A	B	A	B	B	H	B	B	A	B	A	A	A	B	A	A	A	A	A	A	A	A	B	A	A	A	A	A	A	A	H	B	A	B	B	B	B
S2_24888282	2	115.84	B	A	B	B	A	B	A	A	A	A	A	B	A	B	B	H	B	B	A	B	A	A	A	B	A	A	A	A	A	A	A	A	B	A	A	A	A	A	A	A	H	B	A	B	B	B	B
S2_24899362	2	115.86	B	A	B	B	A	B	A	A	A	A	A	B	A	B	B	H	B	B	A	B	A	A	A	B	A	A	A	A	A	A	A	A	B	A	A	A	A	A	A	A	H	B	A	B	B	B	B
S2_24899375	2	115.86001	B	A	B	B	A	B	A	A	A	A	A	B	A	B	B	H	B	B	A	B	A	A	A	B	A	A	A	A	A	A	A	A	B	A	A	A	A	A	A	A	H	B	A	B	B	B	B
S2_24899436	2	115.86002	N	A	B	B	A	B	A	A	A	A	A	B	A	B	B	H	B	B	A	B	A	A	A	B	A	A	A	A	A	A	A	A	B	A	A	A	A	A	A	A	H	B	A	B	B	B	B
S2_24899862	2	115.86003	B	A	B	B	A	B	A	A	A	A	A	B	A	B	B	H	B	B	A	B	A	A	A	B	A	A	A	A	A	A	A	A	B	A	A	A	A	A	A	A	H	B	A	B	B	B	B
S2_24899879	2	115.86004	B	A	B	B	A	B	A	A	A	A	A	B	A	B	B	H	B	B	A	B	A	A	A	B	A	A	A	A	A	A	A	A	B	A	A	A	A	A	A	A	H	B	A	B	B	B	B
S2_24899897	2	115.86005	B	A	B	B	A	B	A	A	A	A	A	B	A	B	B	H	B	B	A	B	A	A	A	B	A	A	A	A	A	A	A	A	B	A	A	A	A	A	A	A	H	B	A	B	B	B	B
S2_24906981	2	115.86006	B	A	B	B	A	B	A	A	A	A	A	B	A	B	B	A	B	B	A	B	A	A	A	B	A	A	A	A	A	A	A	A	B	A	A	A	A	A	A	A	H	B	A	B	B	B	B
S2_24915671	2	115.88	N	A	B	B	A	B	A	A	A	A	A	B	A	B	B	B	B	B	A	B	A	A	N	N	A	N	A	A	A	A	A	A	B	A	A	N	A	N	A	A	B	B	A	B	B	B	N
S2_24924902	2	115.88001	B	A	B	B	A	B	A	A	A	A	A	B	A	B	B	H	B	B	A	B	A	A	A	B	A	A	A	A	A	A	A	A	B	A	A	A	A	A	A	A	B	B	A	B	B	B	B
S2_24937111	2	115.89	B	A	B	B	A	B	A	A	A	A	A	B	A	B	B	H	B	B	A	B	A	A	A	B	A	A	A	A	A	A	A	A	B	A	A	A	A	A	A	A	A	B	A	B	B	B	B
S2_24961256	2	115.92	B	A	B	B	A	B	A	A	A	A	A	B	A	B	B	H	B	B	A	B	A	A	A	B	A	A	A	A	A	A	A	A	B	A	A	A	A	A	A	A	H	B	A	B	B	B	B
S2_24961258	2	115.92001	B	A	B	B	A	B	A	A	A	A	A	B	A	B	B	H	B	B	A	B	A	A	A	B	A	A	A	A	A	A	A	A	B	A	A	A	A	A	A	A	H	B	A	B	B	B	B
S2_24961529	2	115.92002	B	A	B	B	A	B	A	A	A	A	A	B	A	B	B	H	B	B	A	B	A	A	A	B	A	A	A	A	A	A	A	A	B	A	A	A	A	A	A	A	H	B	A	B	B	B	B
S2_24989938	2	115.94	B	A	B	B	A	B	A	A	A	A	A	B	A	B	B	H	B	B	A	B	A	A	A	B	A	A	A	A	A	A	A	A	B	A	A	A	A	A	A	A	H	B	A	B	B	B	B
S2_25044232	2	115.94001	B	A	B	B	A	B	A	A	A	A	A	B	A	B	B	H	B	B	A	B	A	A	A	B	A	A	A	A	A	A	A	A	B	A	A	A	A	A	A	A	H	B	A	B	B	B	B
S2_25044253	2	115.94002	B	A	B	B	A	B	A	A	A	A	A	B	A	B	B	H	B	B	A	B	A	A	A	B	A	A	A	A	A	A	A	A	B	A	A	A	A	A	A	A	H	B	A	B	B	B	B
S2_25044454	2	115.94003	B	A	B	B	A	B	A	A	A	A	A	B	A	B	B	H	B	B	A	B	A	A	A	B	A	A	A	A	A	A	A	A	B	A	A	A	A	A	A	A	H	B	A	B	B	B	B
S2_25054962	2	116.07	B	A	B	B	A	B	A	A	A	A	A	B	A	B	B	B	B	B	A	B	A	A	A	B	A	A	A	A	A	N	A	A	B	A	A	A	A	A	A	A	H	B	A	B	B	B	B
S2_25054965	2	116.07001	B	A	B	B	A	B	A	A	A	A	A	B	A	B	B	B	B	B	A	B	A	A	A	B	A	A	A	A	A	N	A	A	B	A	A	A	A	A	A	A	H	B	A	B	B	B	B
S2_25054966	2	116.07002	B	A	B	B	A	B	A	A	A	A	A	B	A	B	B	B	B	B	A	B	A	A	A	B	A	A	A	A	A	N	A	A	B	A	A	A	A	A	A	A	H	B	A	B	B	B	B
S2_25054967	2	116.07003	B	A	B	B	A	B	A	A	A	A	A	B	A	B	B	B	B	B	A	B	A	A	A	B	A	A	A	A	A	N	A	A	B	A	A	A	A	A	A	A	H	B	A	B	B	B	B
S2_25054968	2	116.07004	B	A	B	B	A	B	A	A	A	A	A	B	A	B	B	B	B	B	A	B	A	A	A	B	A	A	A	A	A	N	A	A	B	A	A	A	A	A	A	A	H	B	A	B	B	B	B
S2_25076497	2	116.07005	B	A	B	B	A	B	A	A	A	A	A	B	A	B	B	H	B	B	A	B	A	A	A	B	A	A	A	A	A	A	A	A	B	A	A	A	A	A	A	A	H	B	A	B	B	B	B
S2_25076513	2	116.07006	B	A	B	B	A	B	A	A	A	A	A	B	A	B	B	H	B	B	A	B	A	A	A	B	A	A	A	A	A	A	A	A	B	A	A	A	A	A	A	A	H	B	A	B	B	B	B
S2_25076532	2	116.07007	B	A	B	B	A	B	A	A	A	A	A	B	A	B	B	H	B	B	A	B	A	A	A	B	A	A	A	A	A	A	A	A	B	A	A	A	A	A	A	A	H	B	A	B	B	B	B
S2_25076533	2	116.07008	B	A	B	B	A	B	A	A	A	A	A	B	A	B	B	H	B	B	A	B	A	A	A	B	A	A	A	A	A	A	A	A	B	A	A	A	A	A	A	A	H	B	A	B	B	B	B
S2_25106457	2	116.07009	N	A	B	B	A	B	A	A	A	A	A	B	A	B	B	H	B	B	A	B	A	A	A	B	A	A	A	A	A	A	A	A	B	A	A	A	A	A	A	A	H	B	A	B	B	B	B
S2_25154659	2	116.13	B	A	B	B	A	B	A	A	A	A	A	B	A	B	B	H	B	B	A	B	A	A	A	B	A	A	A	A	A	A	A	A	B	A	A	A	A	A	A	A	A	B	A	B	B	B	B
S2_25154802	2	116.13001	B	A	B	B	A	B	A	A	A	A	A	B	A	B	B	H	B	B	A	B	A	A	A	B	A	A	A	A	A	A	A	A	B	A	A	A	A	A	A	A	B	B	A	N	B	B	B
S2_25166702	2	116.2	B	A	B	B	A	B	A	A	A	A	A	B	A	B	B	H	B	B	A	B	A	A	A	B	A	A	A	A	A	A	A	A	B	A	A	A	A	A	A	A	H	B	A	B	B	B	B
S2_25377718	2	116.86	B	A	B	B	A	B	A	A	A	A	A	B	A	B	B	H	B	B	A	B	A	A	A	B	B	A	A	A	A	A	A	A	B	A	A	A	A	A	A	A	H	B	A	B	B	B	B
S2_25377726	2	116.86001	B	A	B	B	A	B	A	A	A	A	A	B	A	B	B	H	B	B	A	B	A	A	A	B	B	A	A	A	A	A	A	A	B	A	A	A	A	A	A	A	H	B	A	B	B	B	B
S2_25400408	2	116.86002	N	A	B	B	A	B	A	A	A	A	A	B	A	B	B	H	B	B	A	B	A	A	A	B	B	A	A	A	A	A	A	A	B	A	A	A	A	A	A	A	H	B	A	B	B	B	B
S2_25411602	2	116.86003	B	A	B	B	A	B	A	A	A	A	A	B	A	B	B	H	B	B	A	B	A	A	A	B	B	A	A	A	A	A	A	A	B	A	A	A	A	A	A	A	H	B	A	B	B	B	B
S2_25442913	2	116.95	B	A	B	B	A	B	A	A	A	A	A	B	A	B	B	H	B	B	A	B	A	A	A	B	B	A	A	A	A	A	A	A	B	A	A	A	A	A	A	A	H	B	A	B	B	B	B
S2_25583794	2	117.71	B	A	B	B	A	B	A	A	A	A	A	B	A	B	B	H	B	B	A	B	A	A	A	B	B	A	A	A	A	A	A	A	B	A	A	A	A	A	A	A	H	B	A	B	B	B	B
S2_26070191	2	119.42	B	A	B	B	A	B	A	A	A	H	A	B	A	B	B	H	A	B	A	B	A	A	A	B	B	A	A	A	A	A	A	A	B	A	A	A	A	A	A	A	B	B	A	B	B	B	B
S2_26070743	2	119.42001	B	A	B	B	A	B	A	A	A	A	A	B	A	B	B	H	A	B	A	B	A	A	A	B	B	A	A	A	A	A	A	A	B	A	A	A	A	A	A	A	B	B	A	B	B	B	B
S2_26122039	2	119.84	B	N	N	B	N	B	A	A	A	A	A	B	A	B	B	H	A	B	A	B	A	A	A	B	N	A	A	A	A	A	A	A	B	N	A	A	A	A	A	A	B	B	A	B	B	B	B
S2_26340692	2	121.16	B	A	B	B	A	B	A	A	A	A	A	B	A	B	B	H	A	B	A	B	A	A	A	B	B	A	A	A	A	A	H	A	B	A	A	A	A	A	A	A	B	B	A	B	B	B	B
S2_26350803	2	121.24	B	A	B	B	A	B	A	A	A	A	A	B	A	B	B	H	A	B	A	B	A	A	A	B	B	A	A	A	A	A	A	A	B	A	A	A	A	A	A	A	B	B	A	B	B	B	B
S2_26394683	2	121.73	B	A	B	B	A	B	A	A	A	A	A	B	A	B	B	H	A	B	A	B	A	A	A	B	B	A	A	A	A	N	A	A	B	A	A	N	A	A	A	A	B	B	A	B	B	B	N
S2_26397057	2	121.78	B	A	B	B	A	B	A	A	A	A	A	B	A	B	B	H	A	B	A	B	A	A	A	B	B	A	A	A	A	A	A	A	B	A	A	A	A	A	A	A	B	B	A	B	B	B	B
S2_28391185	2	132.71	B	A	A	B	A	B	A	A	B	A	A	B	A	B	B	H	A	B	A	B	A	A	A	B	B	A	A	A	A	A	A	H	B	A	A	A	A	A	A	A	B	B	A	B	B	B	B
S2_28615968	2	133.28	B	A	A	B	A	B	A	A	B	A	A	B	A	B	B	H	A	B	A	B	A	A	A	B	B	A	A	A	A	A	A	H	B	A	A	A	A	A	A	A	B	B	A	B	B	B	B
S2_28672632	2	133.84	B	A	A	B	A	B	A	A	B	A	A	B	A	B	B	H	A	B	A	B	A	A	A	B	B	A	A	A	A	A	A	H	B	A	A	A	A	A	A	A	B	B	A	B	B	B	B
S2_28754030	2	134.18001	B	A	A	B	A	B	A	A	B	A	A	B	A	B	B	H	A	B	A	B	A	A	A	B	B	A	H	A	A	A	A	H	B	A	A	A	A	A	A	A	B	B	A	B	B	B	B
S2_28773862	2	134.29	B	A	A	B	A	H	A	A	B	A	A	B	A	B	B	H	A	B	A	B	A	A	A	B	B	A	H	A	A	A	A	H	B	A	A	A	A	A	A	A	B	B	A	B	B	B	B
S2_28773872	2	134.29001	B	A	A	B	A	H	A	A	B	A	A	B	A	B	B	H	A	B	A	B	A	A	A	B	B	A	H	A	A	A	A	H	B	A	A	A	A	A	A	A	B	B	A	B	B	B	B
S2_28777835	2	134.29002	B	A	A	B	A	B	A	A	B	A	A	B	A	B	B	H	A	B	A	B	A	A	A	B	B	A	H	A	A	A	A	H	B	A	A	A	A	A	A	A	B	B	N	B	B	B	B
S2_28851349	2	135.09	B	A	A	B	A	B	A	A	B	A	A	B	A	B	B	H	A	B	A	B	A	A	A	B	B	A	H	A	A	A	A	H	B	A	A	A	A	A	A	A	B	B	A	B	B	B	B
S2_28956870	2	135.43	B	A	A	B	A	B	A	A	B	A	A	B	A	B	B	H	A	B	A	B	A	A	A	B	B	A	H	A	A	A	A	H	B	A	A	A	A	A	A	A	B	B	A	B	B	B	B
S2_28956872	2	135.43001	B	A	A	B	A	B	A	A	B	A	A	B	A	B	B	H	A	B	A	B	A	A	A	B	B	A	H	A	A	A	A	H	B	A	A	A	A	A	A	A	B	B	A	B	B	B	B
S2_28956874	2	135.43002	B	A	A	B	A	B	A	A	B	A	A	B	A	B	B	H	A	B	A	B	A	A	A	B	B	A	H	A	A	A	A	H	B	A	A	A	A	A	A	A	B	B	A	B	B	B	B
S2_28957267	2	135.43003	B	A	A	B	A	B	A	A	B	A	A	B	A	B	B	H	A	B	A	B	A	A	A	B	B	A	H	A	A	A	A	H	B	A	A	A	A	A	A	A	B	B	A	B	B	B	B
S2_28957522	2	135.43004	B	A	A	B	A	B	A	A	B	A	A	B	A	B	B	H	A	B	A	B	A	A	A	B	B	A	H	A	A	A	A	H	B	A	A	N	A	A	A	A	B	B	A	B	B	B	B
S2_28958268	2	135.43005	B	A	A	B	A	B	A	A	B	A	A	B	A	B	B	H	A	B	A	B	A	A	A	B	B	A	A	A	A	A	A	H	B	A	A	A	A	A	A	A	B	B	A	B	B	B	B
S2_28979450	2	135.48	B	A	A	B	A	B	A	A	B	A	A	H	A	B	B	H	A	B	A	B	A	A	A	B	B	A	H	A	A	A	A	H	B	A	A	A	A	A	A	A	B	B	A	B	B	B	B
S2_29020268	2	135.56	B	A	A	B	A	B	A	A	B	A	A	B	A	B	B	H	A	B	A	B	A	A	A	B	B	A	H	A	A	A	A	H	B	A	A	A	A	A	A	A	B	B	A	B	B	B	B
S2_29081658	2	135.73	B	A	A	B	A	B	A	A	B	A	A	B	A	B	B	H	A	B	A	B	A	A	A	B	B	A	A	A	A	A	A	H	B	A	A	A	A	A	A	A	B	B	A	B	B	B	N
S2_29086111	2	135.73001	B	A	A	B	A	B	A	A	B	A	A	B	A	B	B	H	A	B	A	B	A	A	A	B	B	A	H	A	A	A	A	H	B	A	A	A	A	A	A	A	B	B	A	B	B	B	B
S2_29118794	2	135.8	B	N	N	B	A	B	A	A	B	A	N	B	A	B	B	H	A	B	A	B	A	A	A	B	B	A	B	A	N	A	A	H	B	A	A	N	A	A	A	A	B	B	N	B	B	B	B
S2_29206428	2	135.96	B	A	A	B	A	B	A	A	B	A	A	B	A	B	B	H	A	B	A	B	A	A	A	B	B	A	B	A	A	A	A	H	B	A	A	A	A	A	A	A	B	B	A	B	B	B	B
S2_29212785	2	135.96001	B	A	A	B	A	B	A	A	B	A	A	B	A	B	B	H	A	B	A	B	A	A	A	B	B	A	H	A	A	A	A	H	B	A	A	A	A	A	A	A	B	B	A	B	B	B	B
S2_29213112	2	135.96002	B	A	A	B	A	B	A	A	B	A	A	B	A	B	B	H	A	B	A	B	A	A	A	B	B	A	H	A	A	A	A	H	B	A	A	A	A	A	A	A	B	B	A	B	B	B	B
S2_29336194	2	136.3	B	A	A	B	A	B	A	A	B	A	A	B	A	B	B	H	A	B	A	B	A	A	A	B	B	A	A	A	A	A	A	H	B	A	A	A	A	A	A	A	B	B	A	B	B	B	B
S2_29363374	2	136.41	B	A	A	B	A	B	A	A	B	A	A	B	A	B	B	H	A	B	A	B	A	A	A	B	B	A	H	A	A	A	A	H	B	A	A	A	A	A	A	A	B	B	A	B	B	B	B
S2_29468829	2	137.43	B	A	A	B	A	B	A	A	B	A	A	B	A	B	B	H	A	B	A	B	A	A	A	B	B	A	N	A	A	A	A	A	B	A	A	A	A	A	A	A	B	B	A	B	B	B	B
S2_29474338	2	137.51	B	A	A	B	A	B	A	A	B	A	A	B	A	B	B	H	A	B	A	B	A	A	A	B	B	A	H	A	A	A	A	H	B	A	A	A	A	A	A	A	B	B	A	B	B	B	B
S2_29522644	2	138.07	B	A	A	B	A	B	A	A	B	A	A	B	A	B	B	H	A	B	A	B	A	A	A	B	B	A	H	A	A	A	A	H	B	A	A	A	A	A	A	A	B	B	A	B	B	B	B
S2_29523018	2	138.07001	B	A	A	B	A	B	A	A	B	A	A	B	A	B	B	H	A	B	A	B	A	A	A	B	B	A	B	A	A	A	A	H	B	A	A	A	A	A	A	A	B	B	A	B	B	B	B
S2_29532252	2	138.17	A	B	B	B	B	A	A	B	B	B	H	A	B	A	A	B	A	A	B	B	B	B	A	B	A	B	B	B	B	B	B	B	B	B	H	A	H	A	B	B	B	A	B	A	A	A	A
S2_29532257	2	138.17001	A	B	B	B	B	A	A	B	B	B	H	A	B	A	A	B	A	A	B	B	B	B	A	B	A	B	B	B	B	B	B	B	B	B	H	A	H	A	B	B	B	A	B	A	A	A	A
S2_29548602	2	138.81	B	A	A	B	A	B	A	A	B	A	A	B	A	B	B	H	A	B	A	B	A	A	A	B	B	A	H	A	A	A	A	H	B	A	A	A	A	A	A	A	B	B	A	B	B	B	B
S2_29567521	2	138.84	B	A	A	B	A	B	A	A	B	A	A	B	A	B	B	H	A	B	A	B	A	A	A	B	B	A	H	A	A	A	A	H	B	A	A	A	A	A	A	A	B	B	A	B	B	B	B
S2_29573918	2	138.86	B	A	A	B	A	B	A	A	B	A	A	B	A	B	B	B	A	B	A	B	A	A	A	B	B	A	H	A	A	A	A	H	B	A	A	A	A	A	A	A	B	B	A	B	B	B	B
S2_29575688	2	138.86001	B	A	A	B	A	B	A	A	B	A	A	B	A	N	B	H	A	B	A	B	A	A	A	B	B	A	A	A	A	A	A	H	B	A	A	A	A	A	A	A	B	B	A	B	B	B	B
S2_29596887	2	138.91	B	A	A	B	A	B	A	A	B	A	A	B	A	B	B	H	A	B	A	B	A	A	A	B	B	A	H	A	A	A	A	H	B	A	A	A	A	A	A	A	B	B	A	B	B	B	B
S2_29601317	2	138.92	B	A	A	B	A	B	A	A	B	A	A	B	A	B	B	H	A	B	A	B	A	A	A	B	B	A	H	A	A	A	A	H	B	A	A	A	A	A	A	A	B	B	A	B	B	B	B
S2_29602570	2	138.92001	B	A	A	B	A	B	A	A	B	A	A	B	A	B	B	H	A	B	A	B	A	A	A	B	B	A	H	A	A	A	A	H	B	A	A	A	A	A	A	A	B	B	A	B	B	B	N
S2_29602596	2	138.92002	B	A	A	B	A	B	A	A	B	A	A	B	A	B	B	H	A	B	A	B	A	A	A	B	B	A	H	A	A	A	A	H	B	A	A	A	A	A	A	A	B	B	A	B	B	B	N
S2_29602600	2	138.92003	B	A	A	B	A	B	A	A	B	A	A	B	A	B	B	H	A	B	A	B	A	A	A	B	B	A	H	A	A	A	A	H	B	A	A	A	A	A	A	A	B	B	A	B	B	B	N
S2_29602611	2	138.92004	N	A	A	B	A	B	A	A	B	A	A	B	A	B	B	H	A	B	A	B	A	A	A	B	B	A	A	A	A	A	A	H	B	A	A	A	A	A	A	A	B	B	A	B	B	B	N
S2_29642643	2	138.98	B	A	A	B	A	B	A	A	B	A	A	B	A	B	B	H	A	B	A	B	A	A	A	B	B	A	H	A	A	A	A	H	B	A	A	A	A	A	A	A	B	B	A	B	B	B	B
S2_29683094	2	139.49	B	A	A	B	A	B	A	A	B	A	A	B	A	B	B	B	A	B	A	B	A	A	A	B	B	A	H	A	A	A	A	H	B	A	A	A	A	A	A	A	B	B	A	B	B	B	B
S2_29683149	2	139.49001	B	A	A	B	A	B	A	A	B	A	A	B	A	B	B	H	A	B	A	B	A	A	A	B	B	A	H	A	A	A	A	H	B	A	A	A	A	A	A	A	B	B	A	B	B	B	B
S2_29733346	2	139.59	N	A	A	B	A	B	A	A	B	A	A	B	A	B	B	H	A	B	A	B	A	A	A	B	B	A	H	A	A	A	A	H	B	A	A	A	A	A	A	A	B	B	A	B	B	B	B
S2_29753709	2	139.68	B	A	A	B	A	B	A	A	B	A	A	B	A	B	B	H	A	B	A	B	A	A	A	B	B	A	H	A	A	A	A	H	B	A	A	A	A	A	A	A	B	B	A	B	B	B	B
S2_29755184	2	139.68001	B	A	A	B	A	B	A	A	B	A	A	B	A	B	B	H	A	B	A	B	A	A	A	B	B	A	H	A	A	A	A	H	B	A	A	A	A	A	A	A	B	B	A	B	B	B	B
S2_29775184	2	139.79	B	A	A	B	A	B	A	A	B	A	A	B	A	B	B	H	A	B	A	B	A	A	A	B	B	A	H	A	A	A	A	H	B	A	A	A	A	A	A	A	B	B	A	B	B	B	B
S2_29789869	2	139.86	B	A	A	B	A	B	A	A	B	A	A	B	A	B	B	H	A	B	A	B	A	A	A	B	B	A	H	A	A	A	A	H	B	A	A	A	A	A	A	A	B	B	A	B	B	B	B
S2_29822056	2	140.45	B	A	A	B	A	B	A	A	B	A	A	B	A	B	B	H	H	B	A	B	A	A	A	B	B	A	H	A	A	A	A	H	B	A	A	A	A	A	A	A	B	B	A	B	B	B	B
S2_29854079	2	141.28	B	A	A	B	A	B	A	A	B	A	A	B	A	B	B	H	A	B	A	B	A	A	A	B	B	A	H	A	A	A	A	H	B	A	A	A	A	A	A	A	B	B	A	B	B	B	B
S2_29854080	2	141.28001	B	A	A	B	A	B	A	A	B	A	A	B	A	B	B	H	A	B	A	B	A	A	A	B	B	A	H	A	A	A	A	H	B	A	A	A	A	A	A	A	B	B	A	B	B	B	B
S2_29918114	2	141.63	B	A	A	B	A	B	A	A	B	A	A	B	A	B	B	H	A	B	A	B	A	A	A	B	B	A	H	A	A	A	A	H	B	A	A	A	A	A	A	A	B	B	A	B	B	B	B
S2_29928182	2	141.7	B	A	A	B	A	B	A	A	B	A	A	B	A	B	B	H	A	B	A	B	A	A	A	B	B	A	N	A	A	A	A	H	B	A	A	A	A	A	A	A	B	B	A	B	N	B	B
S2_29949335	2	141.8	B	A	A	B	A	B	A	A	B	A	A	B	A	B	B	H	A	B	A	B	A	A	A	B	B	A	H	A	A	A	A	H	B	A	A	A	A	A	A	A	B	B	A	B	B	B	B
S2_29949336	2	141.80001	B	A	A	B	A	B	A	A	B	A	A	B	A	B	B	H	A	B	A	B	A	A	A	B	B	A	H	A	A	A	A	H	B	A	A	A	A	A	A	A	B	B	A	B	B	B	B
S2_30094505	2	142.37	B	A	A	B	A	B	A	A	B	A	A	B	A	B	B	N	A	B	A	B	A	A	A	B	B	A	H	A	A	A	A	H	B	A	A	A	A	A	A	A	B	B	A	B	B	B	B
S2_30102619	2	142.37001	B	A	A	B	A	B	A	A	B	A	A	B	A	B	B	H	A	B	A	B	A	A	A	B	B	A	H	A	A	A	A	H	B	A	A	A	A	A	A	A	B	B	A	B	B	B	B
S2_30102668	2	142.37002	B	A	A	B	A	B	A	A	B	A	A	B	A	B	B	H	A	B	A	B	A	A	A	B	B	A	H	A	A	A	A	H	B	A	A	A	A	A	A	A	B	B	A	B	B	B	B
S2_30104385	2	142.44	B	A	A	B	A	B	A	A	B	A	A	B	A	B	B	H	A	B	A	B	A	A	A	B	B	A	A	H	A	A	A	H	B	A	A	A	A	A	H	A	B	B	A	B	B	B	B
S2_30104386	2	142.44001	B	A	A	B	A	B	A	A	B	A	A	B	A	B	B	H	A	B	A	B	A	A	A	B	B	A	A	H	A	A	A	H	B	A	A	A	A	A	H	A	B	B	A	B	B	B	B
S2_30104388	2	142.44002	B	A	A	B	A	B	A	A	B	A	A	B	A	B	B	H	A	B	A	B	A	A	A	B	B	A	A	H	A	A	A	H	B	A	A	A	A	A	H	A	B	B	A	B	B	B	B
S2_30104389	2	142.44003	B	A	A	B	A	B	A	A	B	A	A	B	A	B	B	H	A	B	A	B	A	A	A	B	B	A	A	N	A	A	A	H	B	A	A	A	A	A	N	A	B	B	A	B	H	B	B
S2_30104390	2	142.44004	B	A	A	B	A	B	A	A	B	A	A	B	A	B	B	H	A	B	A	B	A	A	A	B	B	A	A	H	N	A	A	H	B	A	A	A	A	A	H	A	B	B	A	B	B	B	B
S2_30104391	2	142.44005	B	A	A	B	A	B	A	A	B	A	A	B	A	B	B	H	A	B	A	B	A	A	A	B	B	A	A	N	A	A	A	H	B	A	A	A	A	A	N	A	B	B	A	B	B	B	B
S2_30105736	2	142.44006	B	A	A	B	A	B	A	A	B	A	A	B	A	B	B	H	A	B	A	B	A	A	A	B	B	A	H	A	A	A	A	H	B	A	A	A	A	A	A	A	B	B	A	B	B	B	B
S2_30106460	2	142.44007	B	A	A	B	A	B	A	A	B	A	A	B	A	B	B	H	A	B	A	B	A	A	A	B	B	A	H	A	A	A	A	H	B	A	A	A	A	A	A	A	B	B	A	B	B	B	B
S2_30110334	2	142.44008	B	A	A	B	A	B	A	A	B	A	A	B	A	B	B	H	A	B	A	B	A	A	A	B	B	A	A	A	A	A	A	H	B	A	A	A	A	A	A	A	B	B	A	B	B	B	B
S2_30120224	2	142.44009	B	A	A	B	A	B	A	A	B	A	A	B	A	B	B	H	H	B	A	B	A	A	A	B	B	A	H	A	A	A	A	H	B	A	A	A	A	A	A	A	B	B	A	B	B	B	B
S2_30139524	2	142.53	B	A	A	B	A	B	A	A	B	A	A	B	A	B	B	H	A	B	A	B	A	A	A	B	B	A	H	A	A	A	A	H	B	A	A	A	A	A	A	A	B	B	A	B	B	B	B
S2_30144406	2	142.53001	B	A	A	B	A	B	A	A	B	A	A	B	A	B	B	H	H	B	A	B	A	A	A	B	B	A	H	A	A	A	A	H	B	A	A	A	A	A	A	A	B	B	A	B	B	B	B
S2_30162137	2	142.6	B	A	A	B	A	B	A	A	B	A	A	B	A	B	B	H	H	B	A	B	A	A	A	B	B	A	H	A	A	A	A	H	B	A	A	A	A	A	A	A	B	B	A	B	B	B	B
S2_30204038	2	142.71	B	A	A	B	A	B	A	A	B	A	A	B	A	B	B	H	H	B	A	B	A	A	A	B	B	A	H	A	A	A	A	H	B	A	A	A	A	A	A	A	B	B	A	B	B	B	B
S2_30207998	2	142.71002	B	A	A	B	A	B	A	A	B	A	A	B	A	B	B	H	H	B	A	B	A	A	A	B	B	A	H	A	A	A	A	H	B	A	A	A	A	A	A	A	B	B	A	B	B	B	B
S2_30231363	2	142.75	B	A	A	B	A	B	A	A	B	A	A	B	A	B	B	H	H	B	A	B	A	A	A	B	B	A	H	A	A	A	A	H	B	A	A	A	A	A	A	A	B	B	A	B	B	B	B
S2_30984762	2	148.48	B	A	A	B	A	B	A	A	B	A	A	B	A	B	B	H	H	B	A	B	A	A	A	B	B	A	H	A	A	A	A	H	B	A	A	A	A	A	A	A	B	B	A	B	B	B	B
S2_30987475	2	148.48001	B	A	A	B	A	B	A	A	B	A	A	B	A	B	B	H	H	B	A	B	A	A	A	B	B	A	H	A	A	A	A	H	B	A	A	A	A	A	A	A	B	B	A	B	B	B	B
S2_31072122	2	149.24	B	A	A	B	A	B	A	A	A	A	A	B	A	B	B	H	H	B	A	B	A	A	A	B	B	A	H	A	A	A	A	H	B	A	A	A	A	A	A	A	B	B	A	B	B	B	B
S2_31187415	2	150.24	B	A	A	B	A	B	A	A	A	A	A	B	A	B	B	H	H	B	A	B	A	A	A	B	B	A	H	A	A	A	A	H	B	A	A	A	A	A	A	A	B	B	A	B	B	B	B
S2_31202344	2	150.29	B	A	A	B	A	B	A	A	A	A	A	B	A	B	B	H	H	B	A	B	A	A	A	B	B	A	H	A	A	A	A	H	B	A	A	A	A	A	A	A	B	B	A	B	B	B	B
S2_31207774	2	150.3	B	A	A	B	A	B	A	A	A	A	A	B	A	B	B	H	H	B	A	B	A	A	A	B	B	A	H	A	A	A	A	H	B	A	A	A	A	A	A	A	B	B	A	B	B	B	B
S2_31353843	2	150.61	B	A	A	B	A	B	A	A	A	A	A	B	A	B	B	A	H	B	A	B	A	A	A	B	B	A	H	A	A	A	A	H	B	A	A	A	A	A	A	A	B	B	A	B	B	B	B
S2_31405806	2	150.68	B	A	A	B	A	B	A	A	A	A	A	B	A	B	B	H	H	B	A	B	A	A	A	B	B	A	H	A	A	A	A	H	B	A	A	A	A	A	A	A	B	B	A	B	B	B	B
S2_31419279	2	150.71	B	A	A	B	A	B	A	A	A	A	A	B	A	B	B	H	H	B	A	B	A	A	A	B	B	A	H	A	A	A	A	H	B	A	A	A	A	A	A	A	B	B	A	B	B	B	B
S2_31466374	2	151.12	B	N	A	B	A	B	A	A	A	A	A	N	A	B	B	H	H	B	A	B	A	A	A	B	B	A	A	A	A	N	A	H	B	A	A	A	A	A	A	N	B	N	A	N	B	B	B
S2_31489974	2	151.29	B	A	A	B	A	B	A	A	A	A	A	N	A	B	B	H	A	B	A	B	A	A	A	B	B	A	B	A	A	A	A	H	B	A	A	A	A	A	A	A	B	B	A	B	B	B	B
S2_31516346	2	151.46	B	A	A	B	A	B	A	A	A	A	A	B	A	B	B	H	B	B	B	B	A	A	A	B	B	A	H	N	A	A	A	H	B	A	A	A	A	A	A	A	B	B	N	N	B	B	B
S2_31516775	2	151.46001	B	A	A	B	A	B	A	A	A	A	A	B	A	B	B	B	A	B	A	B	A	A	A	B	B	A	H	A	A	A	A	H	B	A	A	A	A	A	A	A	B	B	A	B	B	B	B
S2_31546597	2	151.69	N	A	A	B	A	B	A	A	A	A	A	B	A	B	B	B	B	B	A	B	A	A	A	B	B	A	H	A	A	A	A	H	N	A	A	A	A	A	A	A	B	B	A	N	B	B	B
S2_31570873	2	151.94	B	A	A	B	A	B	A	A	A	A	A	B	A	B	B	H	H	B	A	B	A	A	A	B	B	A	H	A	A	A	A	H	B	A	A	A	A	A	A	A	B	B	A	B	B	B	B
S2_31770057	2	154.8	B	A	A	B	A	B	A	A	A	A	A	B	A	B	B	H	H	B	A	B	A	A	A	B	B	A	H	A	A	A	A	H	B	A	A	A	A	A	A	A	B	B	A	B	B	B	B
S2_31952865	2	155.39	B	A	A	B	A	B	A	A	A	B	A	B	A	B	B	H	B	B	A	B	A	A	A	B	B	A	B	A	A	A	A	H	B	A	A	A	A	A	A	A	B	B	N	B	B	B	B
S2_32673188	2	159.4	B	A	A	B	A	B	A	B	A	A	A	B	A	B	B	H	H	B	A	B	A	A	A	B	B	A	H	A	A	A	A	H	B	A	A	A	A	A	A	A	B	B	A	B	B	B	B
S2_32684202	2	159.40001	B	A	A	B	A	B	A	B	A	A	A	B	A	B	B	H	H	B	A	B	A	A	A	B	B	A	H	A	A	A	A	H	B	A	A	A	A	A	A	A	B	B	A	B	B	B	B
S2_32697234	2	159.43	B	N	A	B	A	B	A	B	A	A	A	B	A	B	B	H	H	B	A	B	A	A	A	B	B	A	H	A	A	A	N	H	B	A	A	A	A	N	A	A	B	B	A	B	B	B	B
S2_33847130	2	164.6	B	A	A	B	A	B	A	B	A	H	A	B	B	B	B	H	H	B	A	A	B	A	A	B	A	A	B	A	A	B	B	H	B	A	A	A	A	A	A	A	B	B	A	B	B	B	B
S2_33863583	2	164.67	B	A	A	B	A	B	A	B	A	H	A	B	B	B	B	H	A	B	A	A	B	A	A	B	A	A	B	A	A	B	B	H	B	A	A	A	A	A	A	A	B	B	A	B	B	B	B
S2_33867112	2	164.67001	B	A	A	B	A	B	A	B	A	H	A	B	B	B	B	H	H	B	H	A	B	A	A	B	A	A	B	A	A	B	B	H	B	A	A	A	A	A	A	A	B	B	A	B	B	B	B
S2_33954062	2	164.96	B	A	A	B	A	B	N	B	A	H	A	B	B	B	B	H	B	B	A	A	B	H	A	B	A	A	B	A	A	B	B	H	B	A	A	A	A	N	A	A	B	B	A	B	B	B	B
S2_33971351	2	165.03	B	A	A	B	A	B	A	B	A	H	A	B	B	B	B	H	B	B	A	A	B	H	A	B	A	A	B	A	A	B	B	H	B	A	A	A	A	A	A	A	B	B	A	B	B	B	B
S2_33980024	2	165.03001	B	A	A	B	A	B	A	B	A	H	A	B	B	B	B	H	B	B	A	A	B	H	A	B	A	A	B	A	A	B	B	H	B	A	A	A	A	A	A	A	B	B	A	B	B	B	B
S2_33980025	2	165.03002	B	A	A	B	A	B	A	B	A	H	A	B	B	B	B	H	B	B	A	A	B	H	A	B	A	A	B	A	A	B	B	H	B	A	A	A	A	A	A	A	B	B	A	B	B	B	B
S2_33990936	2	165.07	B	A	A	B	A	B	A	B	A	H	A	B	B	B	B	H	B	B	A	A	B	H	A	B	A	A	B	A	A	B	B	H	B	A	A	A	A	A	A	A	B	B	A	B	B	B	B
S2_34044666	2	165.31	B	A	A	B	A	B	A	B	A	H	B	B	B	B	B	H	A	B	A	A	B	H	A	B	A	A	B	A	A	B	B	H	B	A	A	A	A	A	A	A	B	B	A	B	B	B	B
S2_34307545	2	166.69	A	A	A	B	A	B	A	B	A	H	B	B	B	B	B	H	A	B	A	A	B	H	A	B	A	A	B	A	A	B	A	B	B	A	A	A	A	A	A	A	B	B	A	B	B	A	B
S2_34358656	2	166.82	A	A	A	B	A	B	A	B	A	H	B	B	B	B	B	H	A	B	A	H	B	B	A	B	A	A	B	A	A	B	A	B	B	A	A	A	A	A	A	A	B	B	A	B	B	A	B
S2_34358688	2	166.82001	A	A	A	B	A	B	A	B	A	H	B	B	B	B	B	H	A	B	A	H	B	B	A	B	A	A	B	A	A	B	A	B	B	A	A	A	A	A	A	A	B	B	A	B	B	A	B
S2_34784617	2	169.62	N	A	A	B	A	B	A	B	A	H	B	B	B	B	B	B	A	B	A	A	B	B	A	B	A	A	B	B	B	B	A	B	B	B	A	A	A	A	A	A	B	B	B	B	B	A	B
S2_34791393	2	169.63	A	A	A	B	A	B	A	B	A	H	B	B	B	B	B	B	A	B	A	A	B	B	A	B	A	A	B	B	B	B	A	B	B	B	A	A	A	A	A	A	B	B	B	B	B	A	B
S2_34791395	2	169.63001	A	A	A	B	A	B	A	B	A	H	B	B	B	B	B	B	A	B	A	A	B	B	A	B	A	A	B	B	B	B	A	B	B	B	A	A	A	A	A	A	B	B	B	B	B	A	B
S2_34796411	2	169.64	A	A	A	B	A	B	A	B	A	H	B	B	B	B	B	B	A	B	A	A	B	B	A	B	A	A	B	B	B	H	A	B	B	B	A	A	A	A	A	A	B	B	B	B	B	A	B
S2_35053040	2	170.31	A	A	A	A	A	B	A	B	A	A	B	A	B	B	B	B	A	B	A	A	B	B	A	B	A	A	B	B	B	B	A	B	B	B	A	A	A	A	A	A	B	B	B	B	B	A	B
S2_35068053	2	170.35	A	A	A	A	A	B	A	B	A	A	B	A	B	B	B	B	A	B	A	A	B	B	A	B	A	A	B	B	B	B	A	B	B	B	A	A	A	A	A	A	B	B	B	B	B	A	B
S2_35068054	2	170.35001	A	A	A	A	A	B	A	B	A	A	B	A	B	B	B	B	A	B	A	A	B	B	A	B	A	A	B	B	B	B	A	B	B	B	A	A	A	A	A	A	B	B	B	B	B	A	B
S2_35075857	2	170.37	A	A	A	A	A	B	A	B	A	A	B	A	B	B	B	B	A	B	A	A	B	B	A	B	A	A	B	B	B	B	A	B	B	B	A	A	A	A	A	A	B	B	B	B	B	A	B
S2_35642187	2	175.11	A	A	A	A	A	B	A	B	B	A	B	A	A	B	H	B	A	B	A	A	B	B	A	A	A	A	B	B	A	B	A	B	B	B	B	A	A	H	A	A	B	B	B	B	A	A	B
S2_35781025	2	175.13	A	A	A	A	A	B	A	B	B	A	B	A	A	B	H	B	A	B	A	A	B	B	A	A	A	A	B	B	A	B	A	B	B	B	B	B	A	H	A	A	B	B	B	B	A	A	B
S2_35825231	2	175.13001	A	A	A	A	A	B	A	B	B	A	B	A	A	B	H	B	A	B	A	A	B	B	A	A	A	A	B	B	A	B	A	B	B	B	B	B	A	H	A	A	B	B	B	B	A	A	B
S3_861488	3	5.53	B	B	A	B	A	B	B	A	B	H	A	B	A	B	H	A	B	A	A	A	A	A	B	A	B	A	B	A	A	A	H	B	B	B	B	B	A	A	B	A	A	A	B	B	A	A	B
S3_862403	3	5.53001	B	B	A	B	A	B	B	A	B	H	A	B	A	B	H	A	B	A	A	A	A	A	B	A	B	A	B	A	A	A	H	B	B	B	B	B	A	A	B	A	A	A	B	B	A	A	B
S3_862840	3	5.53002	B	B	A	B	A	B	B	A	B	H	A	B	A	B	H	A	B	A	A	A	A	A	B	A	B	A	B	A	A	A	H	B	B	B	B	B	A	A	B	A	A	A	B	B	A	A	B
S3_863545	3	5.53003	B	B	A	B	A	B	B	A	B	H	A	B	A	B	H	A	B	A	A	A	A	A	B	A	B	A	B	A	A	A	H	B	B	B	B	B	A	A	B	A	A	A	B	B	A	A	B
S3_864440	3	5.54	B	B	A	B	A	B	B	A	B	H	A	B	A	B	H	A	B	A	A	A	A	A	B	A	B	A	B	A	A	A	H	B	B	B	B	B	A	A	B	A	A	A	B	B	A	A	B
S3_867091	3	5.54001	B	B	A	B	A	B	B	A	B	H	A	B	A	B	H	A	B	A	A	A	A	A	B	A	B	A	B	A	A	A	H	B	B	B	B	B	A	A	B	A	A	A	B	B	A	A	B
S3_877251	3	5.56	N	B	A	B	A	B	B	A	B	H	A	B	A	B	A	A	B	A	A	A	A	A	B	A	B	N	B	A	A	A	B	B	B	B	B	B	A	A	B	A	A	A	B	B	A	A	B
S3_877429	3	5.58	B	B	A	B	A	B	B	A	B	H	A	B	A	B	B	A	B	A	A	A	A	A	B	A	B	A	B	A	A	A	H	B	B	B	B	B	A	A	B	A	A	A	B	B	A	A	B
S3_1682760	3	11.16	N	B	A	B	A	B	B	A	B	H	A	B	A	B	H	A	B	A	A	A	A	A	B	A	B	A	B	A	A	A	H	B	B	B	B	B	A	A	B	B	B	A	B	B	B	B	B
S3_1705565	3	11.27	B	B	A	B	A	B	B	A	A	B	A	B	A	B	H	A	B	A	A	A	A	A	B	A	B	A	B	A	A	A	H	B	B	B	B	B	A	A	B	B	B	A	B	B	B	B	B
S3_1727051	3	11.41	B	B	A	B	A	N	B	A	A	B	A	B	A	B	H	A	B	A	A	A	A	A	B	A	B	A	B	A	A	A	H	B	B	B	B	B	A	A	B	B	B	A	B	B	B	B	B
S3_1780943	3	11.54	B	B	A	B	A	B	B	A	A	B	A	B	A	B	H	A	B	A	A	A	A	A	B	A	B	A	B	A	A	A	H	B	B	B	B	B	A	A	B	B	B	A	B	B	B	B	B
S3_1796079	3	11.57	B	B	A	B	A	B	B	A	A	B	A	B	A	B	H	A	B	A	A	A	A	A	B	A	B	A	B	A	A	A	H	B	B	B	B	B	A	A	B	B	B	A	B	B	B	B	B
S3_1796109	3	11.57001	B	B	A	B	A	B	B	A	A	B	A	B	A	B	H	A	B	A	A	A	A	A	B	A	B	A	B	A	A	A	H	B	B	B	B	B	A	A	B	B	B	A	B	B	B	B	B
S3_1818201	3	11.62	B	B	A	B	A	B	B	A	A	B	A	B	A	B	H	A	B	A	A	A	A	A	B	A	B	A	B	A	A	A	H	B	B	B	B	B	A	A	B	B	B	A	B	B	B	B	B
S3_1832761	3	11.65	B	B	A	B	A	B	B	A	A	B	A	B	A	B	H	A	B	A	A	A	A	A	B	A	B	A	B	A	A	A	H	B	B	B	B	B	A	A	B	B	B	A	B	B	B	B	B
S3_1840273	3	11.66	B	B	A	B	A	B	B	A	A	B	A	B	A	B	H	A	B	A	A	A	A	A	B	A	B	A	B	A	A	A	H	B	B	B	B	B	A	A	B	B	B	A	B	B	B	B	B
S3_1842478	3	11.67	B	B	A	B	A	B	B	A	A	B	A	B	A	B	H	A	B	A	A	A	A	A	B	A	B	A	B	A	A	A	H	B	B	B	B	B	A	A	B	B	B	A	B	B	B	B	B
S3_1867091	3	11.72	B	B	A	B	A	B	B	A	A	B	A	B	A	B	H	A	B	A	A	A	A	A	B	A	B	A	B	A	A	A	H	B	B	B	B	B	A	A	B	B	B	A	B	B	B	B	B
S3_1882236	3	11.79	B	B	A	B	A	B	B	A	A	B	A	B	A	B	H	A	B	A	A	A	A	A	B	A	B	A	B	A	A	A	A	B	B	B	B	B	A	A	B	B	B	A	B	N	B	B	B
S3_1959791	3	12.31	B	B	A	B	A	B	B	A	A	B	A	B	A	B	H	A	B	A	A	A	A	A	B	A	B	A	B	A	A	A	H	B	B	B	B	B	A	A	B	B	B	A	B	B	B	B	B
S3_2020559	3	13.08	B	B	A	B	A	B	B	A	A	B	A	B	A	B	H	A	B	A	A	A	A	A	B	A	B	A	B	A	A	A	H	B	B	B	B	B	A	A	B	B	B	A	B	B	B	B	B
S3_2020599	3	13.08001	B	B	A	B	A	B	B	A	A	B	A	B	A	B	H	A	B	A	A	A	A	A	B	A	B	A	B	A	A	A	H	B	B	B	B	B	A	A	B	B	B	A	B	B	B	B	B
S3_2093081	3	14.29	B	B	A	B	A	B	B	A	A	B	A	H	A	B	H	A	B	A	A	A	A	A	B	A	B	A	B	A	A	A	H	B	B	B	B	B	A	A	B	B	B	A	B	B	B	B	B
S3_2093397	3	14.3	B	B	A	B	A	B	B	A	A	B	A	B	A	B	H	A	B	A	A	A	A	A	B	A	B	A	B	H	A	A	H	B	B	B	B	B	A	A	B	B	B	A	B	B	B	B	B
S3_2100591	3	14.32	N	B	A	B	A	N	B	A	A	B	A	B	A	B	H	A	B	A	N	A	A	A	B	A	B	A	B	N	A	A	A	B	B	B	B	B	A	N	B	B	B	A	B	B	B	B	B
S3_2111982	3	14.35	B	B	A	B	A	B	B	A	A	B	A	B	A	B	H	A	B	A	A	N	A	A	B	A	B	A	B	N	N	A	H	B	B	B	B	B	A	A	B	B	B	A	B	B	B	B	B
S3_2112954	3	14.35001	B	B	A	B	A	B	B	A	A	B	A	B	A	B	H	A	B	A	A	A	A	A	B	A	B	A	B	A	A	A	H	B	B	B	B	B	A	A	B	B	B	A	B	B	B	B	B
S3_2171559	3	14.49	B	B	A	B	A	B	B	A	A	B	A	B	A	B	H	A	B	A	A	A	A	A	B	A	B	A	B	A	A	A	H	B	B	B	B	B	A	A	B	B	B	A	B	B	B	B	B
S3_2201188	3	15.6	B	B	A	B	A	B	B	A	A	B	A	B	A	B	H	A	B	A	A	A	A	A	B	A	B	A	B	A	A	A	H	B	B	B	B	B	A	A	B	B	B	A	B	B	B	B	B
S3_2211826	3	16.11	B	B	A	B	A	B	B	A	A	B	A	B	A	B	H	A	B	A	A	A	A	A	B	A	B	A	B	A	A	A	H	B	B	B	B	B	A	A	B	B	B	A	B	B	B	B	B
S3_2295609	3	16.64	B	B	A	B	A	B	B	A	A	B	A	B	A	B	H	A	B	A	A	A	A	A	B	A	B	A	B	A	A	A	H	B	B	B	B	B	A	A	B	B	B	A	B	B	B	B	B
S3_2352329	3	16.91	B	B	A	B	A	B	B	A	A	B	A	B	A	B	H	A	B	A	A	A	A	A	B	A	B	A	B	A	A	A	H	B	B	B	B	B	A	A	B	B	B	A	B	B	B	B	B
S3_2409522	3	17.34	B	B	A	B	A	B	B	A	B	B	A	B	A	B	H	A	B	A	A	A	A	A	B	A	B	A	B	A	A	A	H	B	B	B	B	B	A	A	B	B	B	A	B	B	B	B	B
S3_2498686	3	17.61	B	B	A	B	A	B	N	A	B	B	A	B	A	B	H	A	B	A	A	A	A	A	B	A	B	A	B	A	A	A	H	B	B	B	B	B	A	A	B	B	B	A	B	B	B	B	B
S3_2516409	3	17.66001	B	B	A	B	A	B	B	A	B	B	A	B	A	B	H	A	B	A	A	A	A	A	B	A	B	A	B	A	A	A	H	B	B	B	B	B	A	A	B	B	B	A	B	B	B	B	B
S3_2553785	3	17.78	B	B	A	B	A	B	B	A	B	B	A	B	A	B	H	A	B	A	A	A	A	A	B	A	B	A	B	A	A	A	H	B	B	B	B	B	A	A	B	B	B	A	B	B	B	B	B
S3_2572474	3	17.87	B	B	A	B	A	B	B	A	B	B	A	B	A	B	H	A	B	A	A	A	A	A	B	A	B	A	B	A	A	A	H	B	B	B	B	B	A	A	B	B	B	A	B	B	B	B	B
S3_2573352	3	17.87001	B	B	A	B	A	B	B	A	B	B	A	B	A	B	H	A	B	A	A	A	A	A	B	A	B	A	B	A	A	A	H	B	B	B	B	B	A	A	B	B	B	A	B	B	B	B	B
S3_2630128	3	18.76	B	B	A	B	A	B	B	A	B	B	A	B	A	B	H	A	B	A	A	A	A	A	B	A	B	A	B	A	A	A	H	B	B	B	B	B	A	A	B	B	B	A	B	B	B	B	B
S3_2674142	3	19.05	B	B	A	B	A	B	B	A	B	B	A	B	A	B	H	A	B	A	A	A	A	A	B	A	B	A	B	A	A	A	H	B	B	B	B	B	A	A	B	B	B	A	B	B	B	B	B
S3_2714299	3	19.41	B	B	A	B	A	N	B	A	B	B	A	B	A	B	H	A	B	A	A	A	A	A	B	A	B	A	B	A	A	A	H	B	B	B	B	B	A	A	B	B	B	A	B	B	B	B	B
S3_3278427	3	22.98	B	B	A	B	A	B	B	N	B	B	A	B	A	B	H	B	B	A	A	A	A	A	B	A	A	A	B	N	A	A	B	B	B	B	B	B	A	A	B	B	B	A	B	B	B	B	B
S3_3533467	3	26.34	B	B	A	B	A	B	B	A	A	B	A	B	A	B	H	B	B	A	A	A	A	A	B	A	A	A	B	B	A	A	B	B	B	B	H	B	A	A	B	B	B	A	B	B	B	B	B
S3_4420196	3	32.45	B	B	A	B	A	B	B	A	A	B	A	B	A	B	B	B	B	A	A	A	A	A	B	B	A	A	B	B	H	A	B	B	B	B	B	A	A	B	B	B	H	A	B	B	B	A	B
S3_4442021	3	32.51	B	B	A	B	A	B	B	A	A	B	A	B	A	B	B	B	B	A	A	A	A	A	B	B	A	A	B	B	H	A	B	B	B	B	B	A	A	B	B	B	B	A	B	B	B	A	B
S3_4464213	3	32.57	B	B	A	B	A	B	B	A	A	B	N	B	A	B	B	B	B	A	A	A	A	A	B	B	A	A	B	B	H	A	B	B	B	B	B	A	A	B	B	B	B	A	B	B	B	A	B
S3_4471336	3	32.58	B	B	A	B	A	B	B	A	A	B	A	B	A	B	B	B	B	A	A	A	A	A	B	B	A	A	B	B	H	A	B	B	B	B	B	A	A	B	B	B	B	A	B	B	B	A	B
S3_4473753	3	32.58001	B	B	A	B	A	B	B	A	A	B	A	B	A	B	B	B	B	A	A	A	A	A	B	B	A	A	B	B	A	A	B	B	B	B	B	A	A	B	B	B	B	A	B	B	B	A	B
S3_4495108	3	32.64	B	B	A	B	A	B	B	A	A	B	A	B	A	B	B	B	B	A	A	A	A	A	B	B	A	A	B	B	H	A	B	B	B	B	B	A	A	B	B	B	B	A	B	B	B	A	B
S3_4924410	3	35.12	B	B	A	B	A	B	B	A	A	B	A	B	A	B	B	B	B	A	A	A	A	A	B	B	A	A	B	B	B	A	B	B	B	B	B	A	A	B	B	B	B	A	B	B	B	B	B
S3_6153249	3	43.39	B	B	A	B	A	B	A	A	A	A	A	B	A	B	B	B	B	A	A	B	B	A	B	B	H	A	B	B	B	B	A	B	B	B	B	B	A	B	B	B	B	B	A	H	B	B	B
S3_6369206	3	43.66	B	B	A	B	A	B	A	A	A	A	A	B	A	B	B	B	B	A	A	B	B	A	B	B	H	A	B	B	B	B	A	B	B	B	B	B	A	B	B	B	B	B	A	A	B	B	B
S3_6583620	3	44.5	B	B	A	B	A	B	A	A	A	B	A	B	A	B	B	B	B	A	A	B	B	A	B	B	B	A	B	B	B	B	A	B	B	B	B	B	A	B	B	B	B	B	A	A	B	B	B
S3_6804222	3	45.5	B	B	A	B	A	B	A	N	A	B	A	B	A	B	B	B	B	A	A	B	B	A	B	B	B	A	N	B	B	B	A	B	B	B	B	B	A	B	B	B	B	B	A	A	B	B	B
S3_6806778	3	45.52	B	B	A	B	A	B	A	A	A	B	A	B	A	B	B	B	B	A	A	B	B	A	B	B	B	A	B	B	B	B	A	B	B	B	B	B	A	B	B	B	B	B	A	A	B	B	B
S3_6807407	3	45.67	B	B	A	B	A	B	A	A	A	B	A	B	A	B	B	B	B	A	A	B	B	A	B	B	B	A	B	B	B	B	A	B	B	B	B	B	A	B	B	B	B	B	A	A	B	B	B
S3_6851504	3	46.96	B	B	A	B	A	B	A	A	A	B	A	B	A	B	B	B	B	A	A	B	B	A	B	B	B	A	B	B	B	B	A	B	B	B	B	B	A	B	B	B	B	B	A	A	B	B	B
S3_6854461	3	46.96001	B	B	A	B	A	B	A	A	A	B	N	B	A	B	B	B	N	A	A	B	B	A	B	B	B	A	B	B	B	B	A	B	B	B	B	N	A	B	B	B	B	B	A	A	B	B	B
S3_6861577	3	46.96002	B	B	A	B	A	B	A	A	A	B	A	B	A	B	B	B	B	A	A	B	B	A	B	B	B	A	B	B	B	B	A	B	B	B	B	B	A	B	B	B	B	B	A	H	B	B	B
S3_6934188	3	47.51	B	B	A	B	A	B	A	A	A	B	A	B	A	B	B	B	B	A	A	B	B	A	B	B	B	A	B	B	B	B	A	B	B	B	B	B	A	B	B	B	B	B	A	A	B	B	B
S3_6970432	3	47.73	B	B	A	B	A	B	A	A	A	B	A	B	A	B	B	B	B	A	A	B	B	A	B	B	B	A	B	B	B	B	A	B	B	B	B	B	A	B	B	B	B	N	A	A	B	B	B
S3_7093769	3	48.15	B	B	A	B	A	B	A	A	A	B	A	B	A	B	B	B	B	A	A	B	B	A	B	B	B	A	B	B	B	B	A	B	B	B	B	B	A	B	B	B	B	B	A	A	B	B	B
S3_7151305	3	48.21	B	B	A	B	A	B	A	A	A	B	A	B	A	B	B	B	B	A	A	B	B	A	B	B	B	A	B	B	B	B	A	B	B	B	B	B	A	B	B	B	B	B	A	A	B	B	B
S3_7183640	3	48.24	B	B	A	B	A	B	A	A	A	B	A	B	A	B	B	B	B	A	A	B	B	A	B	B	B	A	B	B	B	B	A	B	B	B	B	B	A	B	B	B	B	B	A	A	B	B	B
S3_7199297	3	48.25	B	B	A	B	A	B	A	A	A	B	A	B	A	B	B	B	B	A	A	B	B	A	B	B	B	A	B	B	B	B	A	B	B	B	B	B	A	B	B	B	B	B	A	A	B	B	B
S3_7295176	3	48.31	B	B	A	B	A	B	A	N	A	B	A	B	A	N	B	B	N	A	A	B	B	A	B	B	B	A	B	B	B	B	N	B	B	B	B	B	A	B	B	B	N	B	A	A	B	B	B
S3_7339937	3	48.35	B	B	A	B	A	B	A	A	A	B	A	B	A	B	B	B	A	A	A	B	B	A	B	B	B	A	B	B	B	B	A	B	B	B	B	B	A	B	B	B	B	B	A	A	B	B	B
S3_7342804	3	48.35001	B	B	A	B	A	B	A	A	A	B	A	B	A	B	B	B	A	A	A	B	B	A	B	B	B	A	B	B	B	B	A	B	B	B	B	B	A	B	B	B	B	B	A	A	B	B	B
S3_7446597	3	48.43	B	B	A	B	A	B	A	A	A	B	A	B	A	B	B	B	A	A	A	B	B	A	B	B	B	A	B	B	B	B	A	B	B	B	B	B	A	B	B	B	B	B	A	A	B	B	B
S3_7468071	3	48.45	B	B	A	B	A	B	A	A	A	B	A	B	A	B	B	B	A	A	A	B	B	A	B	B	B	A	B	B	B	B	A	B	B	B	B	B	A	N	B	B	B	B	A	N	B	B	B
S3_7503429	3	48.93	B	B	A	B	A	B	A	A	A	B	A	B	A	B	B	B	A	A	A	B	B	A	B	B	B	A	B	B	B	B	A	B	B	B	B	B	A	B	B	B	B	B	A	A	B	B	B
S3_7556057	3	49.07	B	B	A	B	A	B	A	A	A	B	A	B	A	B	B	B	A	A	A	B	B	A	B	B	B	A	B	B	B	B	A	B	B	B	B	B	A	B	B	B	B	B	A	A	B	B	B
S3_7556109	3	49.07001	B	B	A	B	A	B	A	A	A	B	A	B	A	B	B	B	A	A	A	B	B	A	B	B	B	A	B	B	B	B	A	B	B	B	B	B	A	B	B	B	B	B	A	A	B	B	B
S3_7556276	3	49.07002	B	B	A	B	A	B	A	A	A	B	A	B	A	B	B	B	A	A	A	B	B	A	B	B	B	A	B	B	B	B	A	B	B	B	B	B	A	B	B	B	B	B	A	A	B	B	B
S3_7676980	3	49.2	B	B	A	B	A	B	A	A	A	B	A	B	A	B	B	B	A	A	A	B	B	A	B	B	B	A	B	B	B	B	A	B	B	B	B	B	A	B	B	B	B	B	A	A	B	B	B
S3_7688332	3	49.22	B	B	A	B	A	B	A	A	A	B	A	B	A	B	B	B	A	A	N	B	B	N	B	B	B	A	B	B	B	B	A	B	B	B	B	B	A	B	B	B	B	B	A	A	B	B	B
S3_7725359	3	49.25	B	B	A	B	A	B	A	A	A	B	A	B	A	B	B	B	A	A	A	B	B	A	B	B	B	A	B	B	B	B	A	B	B	B	B	B	A	B	B	B	B	B	A	A	B	B	B
S3_7789032	3	49.85	B	B	A	B	A	B	A	A	A	B	A	B	A	H	B	B	A	A	A	B	B	A	B	B	B	A	B	B	B	B	A	B	B	B	B	B	A	B	B	B	B	B	A	A	B	B	B
S3_7842773	3	50.34	B	B	A	B	A	B	A	A	A	B	A	B	A	B	B	B	A	A	A	B	B	A	B	B	B	A	B	B	B	B	A	B	B	B	B	B	A	B	B	B	B	B	A	A	B	B	B
S3_7843696	3	50.34001	B	B	A	B	A	B	A	A	A	B	A	B	A	B	B	B	A	A	A	B	B	A	B	B	B	A	B	B	B	B	A	B	B	B	B	B	A	B	B	B	B	B	A	A	B	B	B
S3_7844181	3	50.34002	B	B	A	B	A	B	A	A	A	B	A	B	A	B	B	B	A	A	N	B	B	A	B	B	B	A	B	B	B	B	A	B	B	B	B	B	A	B	B	B	B	B	A	A	B	B	B
S3_7884776	3	50.7	B	B	A	B	A	B	A	A	A	B	A	B	A	B	B	B	A	A	A	B	B	A	B	B	B	A	B	B	B	B	A	B	B	B	B	B	A	B	B	B	B	B	A	A	B	B	B
S3_7999221	3	51.52	B	B	A	B	A	B	A	A	A	B	A	B	A	B	B	B	A	A	A	B	B	A	B	B	B	A	B	B	B	B	A	B	B	B	B	B	A	B	B	B	B	B	A	A	B	B	B
S3_8011446	3	51.56	B	B	A	B	A	B	A	A	A	B	A	B	A	N	B	B	A	A	A	B	B	A	B	B	B	A	B	B	B	B	A	B	B	B	B	B	A	B	B	B	B	B	A	A	B	B	B
S3_8011465	3	51.56001	B	B	A	B	A	B	A	A	A	B	A	B	A	N	B	B	A	A	A	B	B	A	B	B	B	A	B	B	B	B	A	B	B	B	B	B	A	B	B	B	B	B	A	A	B	B	B
S3_8018288	3	51.59	B	B	A	B	A	B	A	A	A	B	A	B	A	B	B	B	A	A	A	B	B	A	B	B	B	A	B	B	B	B	A	B	B	B	B	B	A	B	B	B	B	B	A	A	B	B	B
S3_8042731	3	51.68	B	B	A	B	A	B	A	A	A	B	A	B	A	B	B	B	A	A	A	B	B	A	B	B	B	A	B	B	B	B	A	B	B	B	B	B	A	B	B	B	B	B	A	A	B	B	B
S3_8042732	3	51.68001	B	B	A	B	A	B	A	A	A	B	A	B	A	B	B	B	A	A	A	B	B	A	B	B	B	A	B	B	B	B	A	B	B	B	B	B	A	B	B	B	B	B	A	A	B	B	B
S3_8042733	3	51.68002	B	B	A	B	A	B	A	A	A	B	A	B	A	B	B	B	A	A	A	B	B	A	B	B	B	A	B	B	B	B	A	B	B	B	B	B	A	B	B	B	B	B	A	A	B	B	B
S3_8042734	3	51.68003	B	B	A	B	A	B	A	A	A	B	A	B	A	B	B	B	A	A	A	B	B	A	B	B	B	A	B	B	B	B	A	B	B	B	B	B	A	B	B	B	B	B	A	A	B	B	B
S3_8042735	3	51.68004	B	B	A	B	A	B	A	A	A	B	A	B	A	B	B	B	A	A	A	B	B	A	B	B	B	A	B	B	B	B	A	B	B	B	B	B	A	B	B	B	B	B	A	A	B	B	B
S3_8042736	3	51.68005	B	B	A	B	A	B	A	A	A	B	A	B	A	B	B	B	A	A	A	B	B	A	B	B	B	A	B	B	B	B	A	B	B	B	B	B	A	B	B	B	B	B	A	A	B	B	B
S3_8062043	3	51.75	B	B	A	B	A	B	A	A	A	B	A	B	A	B	B	B	A	A	A	B	B	A	B	B	B	A	B	B	B	B	A	B	B	B	B	B	A	B	B	B	B	B	A	A	B	B	B
S3_8062060	3	51.75001	B	B	A	B	A	B	A	A	A	B	A	B	A	B	B	B	A	A	A	B	B	A	B	B	B	A	B	B	B	B	A	B	B	B	B	B	A	B	B	B	B	B	A	A	B	B	B
S3_8069950	3	51.87	B	B	A	B	A	B	A	A	A	B	A	B	A	B	B	B	A	A	A	B	B	A	B	B	B	A	B	B	B	B	A	B	B	B	B	B	A	B	B	B	B	B	A	A	B	B	B
S3_8075627	3	51.87001	B	B	A	B	A	B	A	A	A	B	A	B	A	B	B	B	A	A	A	B	B	A	B	B	B	A	B	B	B	B	A	B	B	B	B	B	A	B	B	B	B	B	A	A	B	B	B
S3_8673098	3	53.08	B	B	A	B	A	B	A	A	A	N	A	B	A	B	B	B	N	N	N	B	B	A	B	B	B	A	B	B	B	B	H	B	B	B	B	B	A	B	B	A	B	B	N	A	B	B	B
S3_8673140	3	53.08001	B	B	A	B	A	B	A	A	A	N	A	B	A	B	B	B	N	N	N	B	B	A	B	B	B	A	B	B	B	B	H	B	B	B	B	B	A	B	B	A	B	B	N	A	B	B	B
S3_8673805	3	53.08002	N	B	A	B	A	B	A	A	A	B	A	B	A	B	B	B	A	A	A	B	B	A	B	B	B	A	B	B	B	B	H	B	B	B	B	B	A	B	B	H	B	B	A	A	B	B	B
S3_8679003	3	53.08003	B	B	A	B	A	B	A	A	A	B	A	B	A	B	B	B	A	A	A	B	B	A	B	B	B	A	B	B	B	B	H	B	B	B	B	B	A	B	B	H	B	B	A	A	B	B	B
S3_8698622	3	53.1	B	B	A	B	A	B	A	A	A	B	A	B	A	B	B	B	A	A	A	B	B	A	B	B	B	A	B	B	B	B	H	B	N	N	B	B	A	B	B	H	B	B	A	A	B	B	B
S3_8715488	3	53.13	B	B	A	B	A	B	A	A	A	B	A	B	A	B	B	B	A	A	A	B	B	A	B	B	B	A	B	B	B	B	H	B	B	B	B	B	A	B	B	A	B	B	A	A	B	B	B
S3_8727874	3	53.15	N	N	A	B	A	B	A	A	A	N	A	B	N	B	B	B	A	A	A	B	B	N	B	B	B	A	B	B	B	B	H	B	B	B	B	N	A	B	B	A	B	B	A	A	B	B	B
S3_8728597	3	53.15001	B	B	A	B	A	B	A	A	A	B	A	B	A	B	B	B	A	A	A	B	B	A	B	B	B	A	B	B	B	B	H	B	B	B	B	B	A	B	B	H	B	B	A	A	B	B	B
S3_8741807	3	53.17	B	B	A	B	A	B	A	A	A	B	A	B	A	B	B	B	A	A	A	B	B	A	B	B	B	A	B	B	B	B	H	B	B	B	B	B	A	B	B	H	B	B	A	A	B	B	B
S3_8756508	3	53.22	B	B	A	B	A	B	A	A	A	B	A	B	A	B	B	B	A	A	A	B	B	A	B	B	B	A	B	B	B	B	H	B	B	B	B	B	A	B	B	H	B	B	A	A	B	B	B
S3_8773801	3	53.27	B	B	N	B	A	B	A	A	A	B	A	B	A	B	B	B	A	A	A	B	B	A	B	B	B	A	B	B	B	N	H	B	B	B	B	B	A	B	B	H	B	B	A	A	B	B	B
S3_8776038	3	53.27001	B	B	A	B	A	B	A	A	A	B	A	B	A	B	B	B	A	A	A	B	B	A	B	B	B	A	B	B	B	B	H	B	B	B	B	B	A	B	B	H	B	B	A	A	B	B	B
S3_8827652	3	53.45	B	B	A	B	A	B	A	A	A	N	A	B	A	B	B	B	A	A	A	B	B	A	B	B	B	A	B	B	B	B	H	B	B	N	B	B	A	B	B	B	B	B	A	A	B	B	B
S3_8842843	3	53.49	B	B	A	B	A	B	A	A	A	B	A	B	A	B	B	B	A	A	A	B	B	A	B	B	B	A	B	B	B	B	H	B	B	B	B	N	A	B	B	H	B	B	A	A	B	B	B
S3_8917292	3	53.74	B	B	A	B	A	B	A	A	A	B	A	B	A	B	B	B	A	A	A	B	B	A	B	B	B	A	B	B	B	B	H	B	B	B	B	B	A	B	B	H	B	B	A	A	B	B	B
S3_8993215	3	53.81	B	B	A	B	A	B	A	A	A	B	A	B	A	B	B	B	A	A	A	B	B	A	B	B	B	A	B	B	B	B	H	B	B	B	B	B	A	B	B	H	B	B	A	A	B	B	B
S3_8993232	3	53.81001	B	B	A	B	A	B	A	A	A	B	A	B	A	B	B	B	A	A	A	B	B	A	B	B	B	A	B	B	B	B	H	B	B	B	B	B	A	B	B	H	B	B	A	A	B	B	B
S3_9015494	3	53.83	B	B	A	B	A	B	A	A	A	B	A	B	A	B	B	B	A	A	A	B	B	A	B	B	B	A	B	B	B	B	H	B	B	B	B	B	A	B	B	H	B	B	A	A	B	B	B
S3_9020873	3	53.84	B	B	A	B	N	B	A	A	N	B	A	B	A	B	B	B	N	N	A	B	B	A	B	B	B	A	B	B	B	B	H	B	B	B	B	B	A	B	B	B	B	B	A	A	B	B	B
S3_9069219	3	53.89	B	B	A	B	A	B	A	A	A	B	A	B	A	B	B	B	A	A	A	B	B	A	B	B	B	A	B	B	B	B	H	B	B	B	B	B	A	B	B	H	B	B	A	A	B	B	B
S3_9073867	3	53.89001	B	B	A	B	A	B	A	A	A	B	A	B	A	B	B	B	A	A	A	B	B	A	N	B	B	A	B	B	B	B	H	B	B	B	B	B	A	B	B	B	B	B	A	A	B	B	B
S3_9096492	3	53.91	B	B	A	B	A	B	A	A	A	B	A	B	A	B	B	B	A	A	A	B	B	A	B	B	B	A	B	B	B	B	H	B	B	B	B	B	A	B	B	H	B	B	A	A	B	B	B
S3_9096515	3	53.91001	B	B	A	B	A	B	A	A	A	B	A	B	A	B	B	B	A	A	A	B	B	A	B	B	B	A	B	B	B	B	H	B	B	B	B	B	A	B	B	H	B	B	A	A	B	B	B
S3_9096810	3	53.91002	B	B	A	B	A	B	A	A	A	B	A	B	A	B	B	B	A	A	A	B	B	A	B	B	B	A	B	B	B	B	H	B	B	B	B	B	A	B	B	H	B	B	A	A	B	B	B
S3_9153681	3	53.97	B	B	A	B	A	B	A	A	A	B	A	B	A	B	B	B	A	A	A	B	B	A	B	B	B	A	B	B	B	B	H	B	B	B	B	B	A	B	B	H	B	B	A	A	B	B	B
S3_9199928	3	54.02	B	B	A	B	A	B	A	A	A	B	N	B	A	B	B	B	A	A	A	B	B	A	B	B	B	A	B	B	B	B	H	B	B	N	B	B	A	B	B	H	N	B	A	A	B	B	B
S3_9213242	3	54.08	B	B	A	B	A	B	A	A	A	B	A	B	A	B	B	B	A	A	A	B	B	A	B	B	B	A	B	B	B	B	H	B	B	B	B	B	A	B	B	H	B	B	A	A	B	B	B
S3_9230825	3	54.19	B	B	A	B	A	B	A	A	A	B	A	B	A	B	B	B	A	A	A	B	B	A	B	B	B	A	B	B	B	B	H	B	B	B	B	B	A	B	B	H	B	B	A	A	B	B	B
S3_9231565	3	54.19001	B	B	A	B	A	B	A	A	A	B	A	B	A	B	B	B	A	A	A	B	B	A	B	B	B	A	B	B	B	B	H	B	B	B	B	B	A	B	B	H	B	B	A	A	B	B	B
S3_9255981	3	54.31	B	B	A	B	A	B	A	A	A	B	A	B	A	B	B	B	A	A	A	B	B	A	B	B	B	A	B	B	B	B	H	B	B	B	B	B	A	B	B	H	B	B	A	A	B	B	B
S3_9255985	3	54.31001	B	B	A	B	A	B	A	A	A	B	A	B	A	B	B	B	A	A	A	B	B	A	B	B	B	A	B	B	B	B	H	B	B	B	B	B	A	B	B	H	B	B	A	A	B	B	B
S3_9255987	3	54.31002	B	B	A	B	A	B	A	A	A	B	A	B	A	B	B	B	A	A	A	B	B	A	B	B	B	A	B	B	B	B	H	B	B	B	B	B	A	B	B	H	B	B	A	A	B	B	B
S3_9286850	3	54.53	B	B	A	B	A	B	A	A	A	B	A	B	A	B	B	B	A	A	A	B	B	A	B	B	B	A	B	B	B	B	H	B	B	B	B	B	A	B	B	H	B	B	A	A	B	B	B
S3_9297483	3	54.64	B	B	A	B	A	B	A	A	A	B	A	B	A	B	B	B	A	A	A	B	B	A	B	B	B	A	B	B	B	B	H	B	B	B	B	B	A	B	B	H	B	B	A	A	B	B	B
S3_9317057	3	54.64001	B	B	A	B	A	B	A	A	A	B	A	B	A	B	B	B	A	A	A	B	B	A	B	B	B	A	B	B	B	B	B	B	B	B	B	B	A	B	B	H	B	B	A	A	B	B	B
S3_9350343	3	54.95	B	B	A	B	A	B	A	A	A	B	A	B	A	B	B	B	A	A	A	B	B	A	B	B	B	A	B	B	B	B	H	B	B	B	B	B	A	B	B	H	B	B	A	A	B	B	B
S3_9360569	3	54.95001	B	B	A	B	A	B	A	A	A	B	A	B	A	B	B	B	A	A	A	B	B	A	B	B	B	A	B	B	B	B	H	B	B	B	B	B	A	B	B	H	B	B	A	A	B	B	B
S3_9367575	3	55.05	B	B	A	B	A	B	A	A	A	B	A	B	A	B	B	B	A	A	A	B	B	A	B	B	B	A	B	B	B	B	H	B	B	B	B	B	A	B	B	H	B	B	A	A	B	B	B
S3_9403585	3	55.27001	B	B	A	B	A	B	A	A	A	B	A	B	A	B	B	B	A	A	A	B	B	A	B	B	B	A	B	B	B	B	H	B	B	B	B	B	A	B	B	H	B	B	A	A	B	B	B
S3_9403844	3	55.27002	B	B	A	B	A	B	A	A	A	B	A	B	A	B	B	B	A	A	A	B	B	A	B	B	B	A	B	B	B	B	H	B	B	B	B	B	A	B	B	H	B	B	A	A	B	B	B
S3_9407956	3	55.27003	B	B	A	B	A	B	A	A	A	B	A	B	A	B	B	B	A	A	A	B	B	A	B	B	B	A	B	B	B	B	H	B	B	B	B	B	A	B	B	H	B	B	A	A	B	B	B
S3_9419292	3	55.33	B	B	A	B	A	B	A	A	A	B	A	B	A	B	B	B	A	A	A	B	B	A	B	B	B	A	B	B	B	B	H	B	B	B	B	B	A	B	B	H	B	B	A	A	B	B	B
S3_9419301	3	55.33001	B	B	A	B	A	B	A	A	A	B	A	B	A	B	B	B	A	A	A	B	B	A	B	B	B	A	B	B	B	B	H	B	B	B	B	B	A	B	B	H	B	B	A	A	B	B	B
S3_9419930	3	55.33002	B	B	A	B	A	B	A	A	A	B	N	B	A	B	B	B	A	A	A	B	B	A	B	N	B	A	B	B	B	B	H	B	B	B	B	B	A	B	B	H	B	B	A	A	B	B	B
S3_9419942	3	55.33003	B	B	A	B	A	B	A	A	A	B	N	B	A	B	B	B	A	A	A	B	B	A	B	N	B	A	B	B	B	B	H	B	B	B	B	B	A	B	B	H	B	B	A	A	B	B	H
S3_9480943	3	55.73	B	B	A	B	A	B	A	A	A	B	A	B	A	B	B	B	A	A	A	B	B	A	B	B	B	A	B	B	B	B	H	B	B	B	B	B	A	B	B	H	B	B	A	A	B	B	B
S3_9490752	3	55.76	B	B	A	B	A	B	A	A	A	B	A	B	A	B	B	B	A	A	A	B	B	A	B	B	B	A	B	B	B	B	H	B	B	B	B	B	A	B	B	H	B	B	A	A	B	B	B
S3_9492242	3	55.76001	B	B	A	B	A	B	A	A	A	B	A	B	A	B	B	B	A	A	A	B	B	A	B	B	B	A	B	B	B	B	H	B	B	B	B	B	A	B	B	H	B	B	A	A	B	B	B
S3_9493734	3	55.76002	N	B	A	B	A	B	N	A	A	B	A	B	A	B	B	B	A	A	A	B	B	A	B	B	B	A	B	B	B	B	B	B	B	B	B	B	A	B	B	H	B	B	A	A	B	B	N
S3_9514596	3	56	B	B	A	B	A	B	A	A	A	B	A	N	A	B	B	B	A	A	A	B	B	A	B	B	B	A	B	B	B	B	B	B	N	B	B	B	A	B	B	H	B	B	A	A	B	B	B
S3_9538168	3	56.06	B	B	A	B	A	B	A	A	A	B	A	B	A	B	B	B	A	A	A	B	B	A	B	B	B	A	N	B	B	B	H	B	B	B	B	B	A	B	B	H	B	B	A	A	B	B	B
S3_9581042	3	56.31	B	B	A	B	A	B	A	A	A	B	A	B	A	B	B	B	A	A	A	B	B	A	B	B	B	A	B	B	B	B	H	B	B	B	B	N	A	B	B	B	B	B	A	A	B	B	B
S3_9581723	3	56.31001	B	B	A	B	A	B	A	A	A	B	A	B	A	B	B	B	A	A	A	B	B	A	B	B	B	A	B	B	B	B	H	B	B	B	B	B	A	B	B	H	B	B	A	A	B	B	B
S3_9611861	3	56.41	B	B	A	B	A	B	A	A	A	B	A	B	A	B	B	B	A	A	A	B	B	A	B	B	B	A	H	B	B	B	H	B	B	B	B	B	A	B	B	H	B	B	A	A	B	B	B
S3_9611867	3	56.41001	B	B	A	B	A	B	A	A	A	B	A	B	A	B	B	B	A	A	A	B	B	A	B	B	B	A	B	B	B	B	H	B	B	B	B	B	A	B	B	H	B	B	A	A	B	B	B
S3_9681097	3	56.6	N	B	A	B	A	B	A	A	A	B	A	B	A	B	B	B	A	A	A	B	B	A	B	B	B	A	B	B	B	B	H	B	H	B	B	B	A	B	B	A	B	B	A	A	B	B	B
S3_9760056	3	56.82	B	B	A	B	A	B	A	A	A	B	A	B	A	B	N	B	A	A	A	B	B	A	B	B	B	A	B	B	B	B	H	B	B	B	B	B	A	B	B	H	B	B	A	A	B	B	B
S3_9795010	3	56.91	B	B	A	B	A	B	A	A	A	B	A	B	A	B	B	B	A	A	A	B	B	A	B	B	B	A	B	B	B	B	H	B	B	B	B	B	A	B	B	H	B	B	A	A	B	B	B
S3_9828140	3	57.01	B	B	A	B	A	B	A	A	A	B	A	B	A	B	B	B	A	A	A	B	B	A	B	B	B	A	B	B	B	B	H	B	B	B	B	B	A	B	B	H	B	B	A	A	B	B	B
S3_9873005	3	57.12	B	B	A	B	A	B	A	A	A	B	A	B	A	B	B	B	A	A	A	B	B	A	B	B	B	A	B	B	B	B	H	B	B	B	B	B	A	B	B	H	B	B	A	A	B	B	B
S3_9890879	3	57.15	B	B	A	B	A	B	A	A	A	B	A	B	A	B	B	B	A	A	A	B	B	A	B	B	B	A	B	B	B	B	H	B	B	B	B	B	A	B	B	H	B	B	A	A	B	B	B
S3_10004853	3	57.37	B	B	A	B	A	B	A	A	A	B	A	B	A	B	B	B	A	A	A	B	B	A	B	B	B	A	B	B	B	B	H	B	B	B	B	B	A	B	B	H	B	B	A	A	B	B	B
S3_10028378	3	57.44	B	B	A	B	A	B	A	A	A	B	A	B	A	B	B	B	A	A	A	B	B	A	B	B	B	A	B	B	B	B	H	B	B	B	B	B	A	B	B	H	B	B	A	A	B	B	B
S3_10028628	3	57.44002	B	B	A	B	A	B	A	A	A	B	A	B	N	B	B	B	A	A	A	B	B	A	B	B	B	A	B	B	B	B	B	B	B	B	B	N	A	B	B	H	B	B	A	A	B	B	N
S3_10058125	3	57.76	B	B	A	B	A	B	A	A	A	B	A	B	A	B	B	B	A	A	A	B	B	A	B	B	B	A	B	B	B	B	H	B	B	B	B	B	A	B	B	H	B	B	A	A	B	B	B
S3_10071972	3	57.98	B	N	A	B	A	B	A	A	A	B	A	B	A	B	B	B	A	N	A	B	B	A	B	B	B	A	B	B	N	B	H	B	B	B	B	B	A	B	B	H	B	B	A	A	B	B	B
S3_10086536	3	58.11	B	B	A	B	A	B	A	A	A	B	A	B	A	B	B	B	A	A	A	B	B	A	B	B	B	A	B	B	B	B	H	B	B	B	B	B	A	B	B	H	B	B	A	A	B	B	B
S3_10107670	3	58.36	B	B	A	B	A	B	A	A	A	B	A	B	A	B	B	B	A	A	A	B	B	A	B	B	B	A	B	B	B	B	H	B	B	B	B	B	A	B	B	H	B	B	A	A	B	B	B
S3_10116552	3	58.45	B	B	A	B	A	B	A	A	A	B	A	B	A	B	B	B	A	A	A	B	B	A	B	B	B	A	B	B	B	B	H	B	B	B	B	B	A	B	B	H	B	B	A	A	B	B	B
S3_10116554	3	58.45001	B	B	A	B	A	B	A	A	A	B	A	B	A	B	B	B	A	A	A	B	B	A	B	B	B	A	B	B	B	B	H	B	B	B	B	B	A	B	B	H	B	B	A	A	B	B	B
S3_10213105	3	59.06	B	B	A	B	A	B	A	A	A	B	A	B	A	B	B	B	A	A	A	B	B	A	B	B	B	A	B	B	B	B	B	B	B	B	B	B	A	B	B	H	B	B	A	A	B	B	B
S3_10218719	3	59.09	B	B	A	B	A	B	A	A	A	B	A	B	A	B	B	B	A	A	A	B	B	A	B	B	B	A	B	B	B	B	B	B	B	B	B	B	A	B	B	H	B	B	A	A	B	B	B
S3_10426027	3	60.41	B	B	A	B	A	B	A	A	A	B	A	B	A	B	B	B	B	A	A	B	B	A	B	B	B	A	B	B	B	B	B	B	B	B	B	B	A	B	B	H	B	B	A	A	B	B	A
S3_10426058	3	60.41001	B	B	A	B	A	B	A	A	A	B	A	B	A	B	B	B	B	A	A	B	B	A	B	B	B	A	B	B	B	B	B	B	B	B	B	B	A	B	B	H	B	B	A	A	B	B	A
S3_10589823	3	62.35	B	B	A	B	A	B	A	A	A	B	A	B	A	B	B	B	B	A	A	B	B	A	B	B	B	A	B	B	B	B	B	B	B	B	B	B	A	B	B	H	B	B	B	A	B	B	A
S3_12619435	3	71.98	B	B	A	B	A	B	A	A	A	B	A	B	A	B	B	B	B	A	A	B	B	A	B	B	B	A	B	B	B	B	B	B	B	A	B	H	A	B	B	A	B	B	B	A	B	B	A
S3_12654629	3	72.21	B	B	A	B	A	B	A	A	A	B	A	B	A	B	B	B	B	A	A	B	B	A	B	B	B	A	B	B	B	B	B	B	B	A	B	A	A	B	B	A	B	B	B	A	B	B	A
S3_12659394	3	72.21001	B	B	A	B	A	B	A	A	A	B	A	B	A	B	B	B	B	N	A	B	B	A	B	B	B	B	B	B	B	B	B	B	B	A	B	H	A	B	B	A	B	B	B	A	B	B	A
S3_12695895	3	72.41	B	B	A	B	A	B	A	A	A	B	A	B	A	B	B	B	B	A	A	B	B	A	B	B	B	B	B	B	B	B	B	B	B	A	B	H	A	B	B	A	B	B	B	A	B	B	A
S3_12695939	3	72.41001	B	B	A	B	A	B	A	A	A	B	A	B	A	B	B	B	B	A	A	B	B	A	B	B	B	B	B	B	B	B	B	B	B	A	B	H	A	B	B	A	B	B	B	A	B	B	A
S3_12733159	3	72.82	B	B	A	B	A	B	A	A	A	B	A	B	A	B	B	B	B	A	A	B	B	A	B	B	B	B	B	B	B	B	B	B	B	A	B	H	A	B	B	A	B	B	B	A	B	B	A
S3_12741556	3	72.88	B	B	A	B	A	B	A	A	A	B	A	B	A	B	B	B	B	A	B	B	B	A	B	B	B	B	B	B	B	B	B	B	B	A	B	H	A	B	B	A	B	B	B	A	B	B	A
S3_12741567	3	72.88001	B	B	A	B	A	B	A	A	A	B	A	B	A	B	B	B	B	A	B	B	B	A	B	B	B	B	B	B	B	B	B	B	B	A	B	H	A	B	B	A	B	B	B	A	B	B	A
S3_12754378	3	73.08	B	B	A	B	A	B	A	A	A	B	A	B	A	B	B	B	B	A	B	B	B	A	B	B	B	B	B	B	B	B	B	B	B	A	B	H	A	B	B	A	B	B	B	A	B	B	A
S3_12937827	3	76.14	B	B	A	B	A	B	A	B	A	B	A	B	A	B	B	B	B	A	B	B	B	A	B	B	B	B	B	B	B	B	B	B	B	A	B	H	B	B	B	A	B	B	B	A	B	B	A
S3_12945533	3	76.25	B	B	A	B	A	B	A	B	A	B	A	B	A	B	B	B	B	A	B	B	B	A	B	B	B	B	B	B	B	B	B	B	B	A	B	A	B	B	B	A	B	B	B	A	B	B	A
S3_12945547	3	76.25001	B	B	A	B	A	B	A	B	A	B	A	B	A	B	B	B	B	A	B	B	B	A	B	B	B	B	B	B	B	B	B	B	B	A	B	A	B	B	B	A	B	B	B	A	B	B	A
S3_12995065	3	77.22	B	B	A	B	A	B	A	B	A	B	A	B	A	B	B	B	B	A	B	B	B	A	B	B	B	B	B	B	B	B	B	B	B	A	B	H	B	B	B	A	B	B	B	A	B	B	A
S3_13276345	3	80.98	N	H	A	A	B	B	A	B	A	B	A	B	B	B	B	B	B	A	B	B	B	A	B	B	B	B	B	B	B	B	B	B	B	A	B	A	B	B	B	B	B	B	B	A	B	B	A
S3_13603720	3	81.3	A	H	A	A	B	B	A	B	A	B	A	B	B	B	B	B	B	A	B	B	B	A	H	H	B	B	B	B	B	B	B	B	B	A	B	A	B	B	B	B	B	B	B	A	B	B	A
S3_13839691	3	82.43	B	A	B	B	B	A	A	A	B	B	B	B	A	A	A	B	B	A	B	A	B	B	B	B	B	A	A	A	A	B	B	B	A	B	B	A	A	B	B	B	A	A	A	A	B	A	B
S3_14144630	3	83.1	A	B	A	A	B	B	A	A	A	B	A	B	B	B	B	B	B	A	B	A	B	A	B	B	B	B	B	B	A	B	B	B	B	A	B	A	B	A	B	B	H	B	B	A	B	B	A
S3_14144714	3	83.10001	A	B	A	A	B	B	A	A	A	B	A	B	B	B	B	B	B	A	B	A	B	A	B	B	B	B	B	B	A	B	B	B	B	A	B	A	B	A	B	B	H	B	B	A	B	B	A
S3_14302831	3	83.75	A	B	A	A	B	B	A	A	A	B	A	B	B	B	B	B	B	A	B	A	B	A	B	B	B	B	B	B	A	B	B	B	B	A	B	A	B	A	B	B	H	B	B	A	B	B	A
S3_14326233	3	83.81	A	B	A	A	B	B	A	A	A	B	A	B	B	B	B	B	B	A	B	A	B	A	B	B	B	B	B	B	A	B	B	B	B	A	B	A	B	A	A	B	H	B	B	A	B	B	A
S3_14326258	3	83.81001	A	B	A	A	B	B	A	A	A	B	A	B	B	B	B	B	B	A	B	A	B	A	B	B	B	B	B	B	A	B	B	B	B	A	B	A	B	A	A	B	H	B	B	A	B	B	A
S3_14353133	3	84.03	A	B	A	A	B	B	A	A	A	B	A	B	B	B	B	B	B	A	B	A	B	A	B	B	B	B	B	B	A	B	B	B	B	A	B	A	B	A	A	B	H	B	B	A	B	B	A
S3_14399551	3	84.06	A	B	A	A	B	B	A	A	A	B	A	B	B	B	B	B	B	A	B	A	B	A	B	B	B	B	B	B	A	B	B	B	B	A	B	A	B	A	A	B	H	B	B	A	B	B	A
S3_14490454	3	84.69	A	B	A	A	B	B	A	B	A	B	A	B	B	B	B	B	B	A	B	A	B	A	B	B	B	B	B	A	A	B	B	B	B	A	B	A	B	A	A	B	H	B	B	A	B	B	A
S3_14494953	3	84.72	A	B	A	A	B	B	H	B	A	B	A	B	B	B	B	B	B	A	B	A	B	A	B	B	B	B	B	A	A	B	B	B	B	A	B	A	B	A	A	B	H	B	B	A	B	B	A
S3_14598882	3	85.66	A	B	A	A	B	B	A	B	A	B	A	B	B	B	B	B	B	A	B	A	B	A	B	B	B	B	B	A	A	B	B	B	B	A	B	A	B	A	A	B	H	B	B	A	B	B	A
S3_14599884	3	85.66001	A	B	A	A	B	B	A	B	A	B	A	B	B	B	B	B	B	A	B	A	B	A	B	B	B	B	B	A	A	B	B	B	B	A	B	A	B	A	A	B	H	B	B	A	B	B	A
S3_14599891	3	85.66002	A	B	A	A	B	B	A	B	A	B	A	B	B	B	B	B	B	A	B	A	B	A	B	B	B	B	B	A	A	B	B	B	B	A	B	A	B	A	A	B	H	B	B	A	B	B	A
S3_14686503	3	86.24	A	B	A	A	B	B	A	B	A	B	A	B	B	B	B	B	B	A	B	A	B	A	B	B	B	B	B	A	A	B	B	B	B	A	B	A	B	A	A	B	H	B	B	A	B	B	A
S3_14686515	3	86.24001	A	B	A	A	B	B	A	B	A	B	A	B	B	B	B	B	B	A	B	A	B	A	B	B	B	B	B	A	A	B	B	B	B	A	B	A	B	A	A	B	H	B	B	A	B	B	A
S3_14686531	3	86.24002	A	B	A	A	B	B	A	B	A	B	A	B	B	B	B	B	B	A	B	A	B	A	B	B	B	B	B	A	A	B	B	B	B	A	B	A	B	A	A	B	H	B	B	A	B	B	A
S3_14725298	3	86.42	A	B	A	A	B	B	A	B	A	B	A	B	B	B	B	B	B	A	B	A	B	A	B	B	B	B	B	A	A	B	B	B	B	A	B	A	B	A	A	B	H	B	B	A	B	B	A
S3_14725301	3	86.42001	A	B	A	A	B	B	A	B	A	B	A	B	B	B	B	B	B	A	B	A	B	A	B	B	B	B	B	A	A	B	B	B	B	A	B	A	B	A	A	B	H	B	B	A	B	B	A
S3_14725309	3	86.42002	A	B	A	A	B	B	A	B	A	B	A	B	B	B	B	B	B	A	B	A	B	A	B	B	B	B	B	A	A	B	B	B	B	A	B	A	B	A	A	B	H	B	B	A	B	B	A
S3_14728023	3	86.42003	A	B	A	A	B	B	A	B	A	B	A	B	B	B	B	B	B	A	B	A	B	A	B	B	B	B	B	A	A	B	B	B	B	A	B	A	B	A	A	B	H	B	B	A	B	B	A
S3_14739507	3	86.46	A	B	A	A	B	B	A	B	A	B	A	B	B	B	B	B	B	A	B	A	B	A	B	B	B	B	B	A	A	B	B	B	B	A	B	A	B	A	A	B	H	B	B	A	B	B	A
S3_14760067	3	87.06	A	B	A	A	B	B	A	B	A	B	A	B	B	B	B	B	B	A	B	A	B	A	B	B	B	B	B	A	A	B	B	B	B	A	B	A	B	A	A	B	H	B	B	A	B	B	A
S3_14767464	3	87.08	A	B	A	A	B	B	A	B	A	B	A	B	B	B	B	B	B	A	B	A	B	A	B	B	B	B	N	A	A	B	B	B	B	A	B	A	B	A	A	B	H	B	B	A	B	B	A
S3_14797048	3	87.32	A	B	A	A	B	B	A	B	A	B	A	B	B	B	B	B	B	A	B	A	B	A	B	B	B	B	B	A	A	B	B	B	B	A	B	A	B	A	A	B	H	B	B	A	B	B	A
S3_14845342	3	87.6	A	B	A	A	B	B	A	B	A	B	A	B	B	B	B	B	B	A	B	A	B	A	B	B	B	B	B	A	A	B	B	B	B	A	B	A	B	A	A	B	H	B	B	A	B	B	A
S3_14854910	3	87.60001	A	B	A	A	B	N	A	B	A	B	A	B	B	B	B	B	B	A	B	A	B	A	B	B	B	B	B	A	A	B	B	B	B	A	B	A	B	A	A	B	H	B	B	A	B	B	A
S3_14901675	3	88.59	A	B	A	A	B	B	A	B	A	B	A	B	B	B	B	B	B	A	B	A	B	A	B	B	B	B	B	A	A	B	B	B	B	A	B	A	A	A	B	B	H	B	B	A	B	B	A
S3_14937962	3	88.78	A	B	A	A	B	B	A	B	A	B	A	B	B	B	B	B	B	A	B	A	B	A	B	B	B	B	B	A	A	B	B	B	B	A	B	A	A	A	B	B	H	B	B	A	B	B	A
S3_14968410	3	89.1	A	B	A	A	B	B	A	B	A	B	A	B	B	B	B	B	B	A	B	H	B	A	B	B	B	B	B	A	A	B	B	B	B	A	B	A	A	A	B	B	H	B	B	A	B	B	A
S3_15001548	3	89.3	A	B	A	A	B	B	A	B	A	B	A	B	B	B	B	B	B	A	B	H	B	A	B	B	B	N	B	A	A	B	B	B	N	A	B	A	A	A	B	B	H	B	B	A	B	B	A
S3_15031965	3	89.34	A	B	A	A	B	B	A	B	A	B	A	B	B	B	B	N	B	A	B	H	B	A	B	B	B	B	B	A	A	B	B	N	B	A	B	A	A	A	B	B	H	B	B	A	N	B	A
S3_15031970	3	89.34001	A	B	A	A	B	B	A	B	A	B	A	B	B	B	B	N	B	A	B	H	B	A	B	B	B	B	B	A	A	B	B	N	B	A	B	A	A	A	B	B	H	B	B	A	N	B	A
S3_15031973	3	89.34002	A	B	A	A	B	B	A	B	A	B	A	B	B	B	B	N	B	A	B	H	B	A	B	B	B	B	B	A	A	B	B	N	B	A	B	A	A	A	B	B	H	B	B	A	N	B	A
S3_15126354	3	90.3	A	B	A	A	B	B	A	B	A	B	A	B	B	B	B	B	B	A	B	H	B	A	B	B	B	B	B	A	A	B	B	B	B	A	B	A	A	A	B	B	H	B	B	A	B	B	A
S3_15126910	3	90.30001	A	B	A	A	B	B	A	B	A	B	A	B	B	B	B	B	B	A	B	H	N	A	N	B	B	B	B	A	A	B	B	B	B	A	B	A	A	A	B	B	H	B	B	A	B	B	A
S3_15563875	3	92.69	N	B	A	A	N	B	B	B	A	B	A	A	N	B	N	B	B	A	B	A	B	A	B	B	B	B	B	A	A	B	B	B	B	B	B	A	A	A	B	B	B	B	B	A	B	B	A
S3_15587083	3	92.69001	A	B	A	A	B	B	B	B	A	B	A	A	B	B	B	B	B	A	B	A	B	A	B	B	B	B	B	A	A	B	B	B	B	B	B	A	A	A	B	B	B	B	B	N	B	B	A
S3_15697407	3	93.22	A	B	A	A	B	B	B	B	A	B	A	A	B	B	B	B	B	A	B	A	B	A	B	B	B	B	B	A	A	B	B	B	B	B	B	A	A	A	B	B	B	B	B	A	B	B	N
S3_16209326	3	96.89	B	B	A	A	B	B	B	B	A	B	A	A	B	B	B	B	B	A	H	A	B	A	B	B	B	A	B	A	B	B	B	B	B	B	B	A	A	A	B	B	B	B	B	A	B	B	B
S3_16307232	3	97.54	B	B	A	A	B	B	B	A	A	B	A	A	B	B	B	B	B	A	B	A	B	A	B	B	B	A	B	A	B	B	B	B	B	B	B	A	A	A	B	B	B	B	B	A	B	B	B
S3_16322950	3	97.54001	B	B	A	A	B	B	B	A	A	B	A	A	B	B	B	B	B	A	B	A	B	A	B	B	B	A	B	A	B	B	B	B	B	B	B	A	A	A	B	B	B	B	B	A	H	B	B
S3_16358796	3	98.01	B	B	A	A	B	B	A	A	A	B	A	A	B	B	B	B	B	A	B	A	B	A	B	B	B	H	B	A	B	B	B	B	B	B	B	A	A	A	B	B	B	B	B	A	B	B	B
S3_16358864	3	98.01001	B	B	A	A	B	B	A	A	A	B	A	A	B	B	B	B	B	A	B	A	B	A	B	B	B	A	B	A	B	B	B	B	N	B	B	A	A	A	B	B	B	B	B	A	B	B	B
S3_16359129	3	98.01002	B	B	A	A	B	B	A	A	A	B	A	A	B	B	B	B	B	A	B	A	B	A	B	B	B	A	B	A	B	B	B	B	B	B	B	A	A	A	B	B	B	B	B	A	B	B	B
S3_16451083	3	99.03	B	B	A	A	B	B	A	A	A	B	A	A	B	B	B	B	B	A	B	A	B	A	B	B	B	N	B	A	B	B	B	B	B	B	B	A	A	A	B	B	B	B	B	A	B	B	B
S3_16529108	3	99.18	B	B	A	A	B	B	A	A	A	B	A	A	B	B	B	B	B	A	B	A	B	A	B	B	B	A	B	A	B	B	B	B	B	B	B	A	A	A	B	B	B	B	B	A	B	B	B
S3_16612671	3	99.97	B	B	A	A	B	B	A	A	N	B	A	A	B	B	B	B	B	A	B	A	B	A	B	B	B	A	B	A	B	B	B	B	B	B	B	A	A	A	B	B	B	B	B	A	B	B	B
S3_16658545	3	100.43	N	B	A	A	B	B	A	A	A	B	A	A	B	B	B	B	B	A	B	A	B	A	B	B	B	A	B	A	B	B	B	B	B	B	B	A	A	A	B	B	B	B	B	A	B	B	B
S3_16693292	3	100.75	B	B	A	A	B	B	A	A	A	B	A	A	B	B	B	B	B	A	B	A	B	A	B	B	B	A	B	A	B	B	B	B	B	B	B	A	A	A	B	B	B	B	B	A	B	B	B
S3_16736722	3	101.13	B	B	A	A	B	B	A	A	A	B	A	A	B	B	B	B	B	A	B	A	B	A	B	B	B	A	B	A	B	B	B	B	B	B	B	A	A	A	B	B	B	B	B	A	B	B	B
S3_16736753	3	101.13001	B	B	A	A	B	H	A	A	A	B	A	A	B	B	B	B	B	A	B	A	B	A	B	B	B	A	B	A	B	B	B	B	B	B	B	A	A	A	B	B	B	B	B	A	B	B	B
S3_16804663	3	101.6	B	B	A	A	B	B	A	A	A	B	A	A	B	B	B	B	B	A	B	A	B	A	B	B	B	A	B	A	B	B	B	B	B	B	B	A	A	A	B	B	B	B	B	A	B	B	B
S3_16835529	3	102.27	B	B	A	A	B	B	A	A	A	B	A	A	B	B	B	B	B	A	B	A	B	A	B	B	B	A	B	A	B	B	B	B	B	B	B	A	A	A	B	B	B	B	B	A	B	B	B
S3_16835559	3	102.27001	B	B	A	A	B	B	A	A	A	B	A	A	B	B	B	B	B	A	B	A	B	A	B	B	B	A	B	A	B	B	B	B	B	B	B	A	A	A	B	B	B	B	B	A	B	B	B
S3_16880274	3	102.36	B	B	A	A	B	B	A	A	A	B	A	A	B	B	B	B	B	A	B	A	B	A	B	B	B	A	B	A	B	B	B	B	B	B	B	A	A	A	B	B	B	B	B	A	B	B	B
S3_17083355	3	103.48	B	B	A	A	B	B	A	A	A	B	A	A	B	B	B	B	B	A	B	A	B	A	B	B	B	A	B	A	B	B	B	B	N	B	B	A	A	A	B	B	B	B	B	A	B	B	B
S3_17159649	3	103.72	B	B	A	A	B	B	A	A	A	B	A	A	B	B	B	B	B	A	B	A	B	A	B	B	B	A	B	A	B	B	B	B	B	B	B	A	A	A	B	B	B	B	B	A	B	B	B
S3_21127035	3	108.52	B	B	B	A	B	B	A	A	B	A	A	A	B	B	B	B	B	A	B	A	B	A	B	B	B	A	B	A	B	B	B	B	B	B	B	A	A	A	B	B	A	A	B	A	B	B	B
S3_21198423	3	108.89	B	B	B	A	B	B	A	A	B	A	A	A	B	B	B	B	B	A	B	A	B	A	B	B	B	A	B	A	B	B	B	B	B	B	B	A	A	A	B	B	A	A	B	A	B	B	B
S3_21205279	3	108.97	B	B	N	A	B	N	A	A	N	A	A	N	B	B	B	B	B	N	B	A	B	A	B	B	B	A	B	A	B	B	B	B	B	B	B	A	A	A	B	B	A	A	B	A	B	B	N
S3_21228508	3	108.98	N	H	B	A	B	B	A	A	B	A	A	A	B	B	B	B	B	A	B	A	B	A	B	B	B	A	B	A	B	B	B	B	B	B	B	A	A	A	B	B	A	A	B	A	B	B	B
S3_21281932	3	108.98001	B	B	B	A	B	B	N	A	B	A	A	A	B	B	B	B	B	A	B	A	B	A	B	B	B	A	B	A	B	B	B	B	B	B	B	A	A	A	B	B	A	A	B	A	B	B	B
S3_21313910	3	108.98002	B	B	B	A	B	B	A	A	B	A	A	A	B	B	B	B	B	A	B	A	B	A	B	B	B	A	B	A	B	B	B	B	B	B	B	A	A	A	B	B	A	A	B	A	B	B	B
S3_21313933	3	108.98003	B	B	B	A	B	B	A	A	B	A	N	A	B	B	B	B	B	A	B	A	B	A	B	B	B	A	B	A	B	B	B	B	B	B	B	N	A	N	B	B	A	A	B	A	B	B	B
S3_21315611	3	110.75	B	B	B	A	B	B	A	A	B	A	A	A	B	B	B	B	B	A	B	A	B	A	B	B	B	A	B	A	B	B	B	B	B	B	B	A	A	A	B	B	A	A	B	A	B	B	B
S3_21335429	3	110.75001	B	B	B	A	B	B	A	A	B	A	A	A	B	B	B	B	B	A	B	A	B	A	B	B	B	A	B	A	B	B	B	B	B	B	B	A	A	A	B	B	A	A	B	A	B	B	B
S3_21374862	3	110.75002	B	B	B	A	B	B	A	A	B	A	A	A	B	B	B	B	B	A	B	A	B	A	B	B	B	A	B	A	B	B	B	N	B	B	B	A	A	A	B	B	A	A	B	A	B	B	B
S3_21374865	3	110.75003	B	B	B	A	B	B	A	A	B	A	A	A	B	B	B	B	B	A	B	A	B	A	B	B	B	A	B	A	B	B	B	N	B	B	B	A	A	A	B	B	A	A	B	A	B	B	B
S3_21439673	3	110.86	N	B	B	A	B	B	A	A	B	A	N	A	B	B	B	B	B	B	B	A	B	A	B	B	B	A	B	A	B	B	B	B	B	B	B	A	A	A	B	B	A	A	B	A	B	B	B
S3_21439697	3	110.86001	B	B	B	A	B	B	A	A	B	A	N	A	B	B	B	B	B	B	B	A	B	A	B	B	B	A	B	A	B	B	B	B	B	B	B	A	A	A	B	B	A	A	B	A	B	B	B
S3_21454284	3	110.86002	B	B	B	A	B	B	A	A	B	A	A	A	B	B	B	B	B	B	B	A	B	A	B	B	B	A	B	A	B	B	B	B	B	B	B	A	A	A	B	B	A	A	B	A	B	B	B
S3_21660582	3	111.33	B	B	B	A	B	B	A	A	B	A	A	A	B	B	B	B	B	B	B	A	B	A	B	B	B	A	B	A	B	B	B	B	B	B	B	A	A	A	B	B	A	A	B	A	B	B	B
S3_21670312	3	111.44	B	B	B	A	B	B	A	A	B	A	A	A	B	B	B	B	B	B	B	A	B	A	B	B	B	A	B	A	B	B	B	B	B	B	B	A	A	A	B	B	A	A	B	A	B	B	B
S3_21701030	3	111.58	B	B	B	N	B	B	A	A	B	A	A	A	B	B	B	B	B	B	B	A	B	A	B	B	B	A	B	A	B	B	B	B	B	B	B	A	A	A	B	B	A	A	B	A	B	B	B
S3_21701129	3	111.58001	B	B	B	A	B	B	A	A	B	A	A	A	B	B	B	B	B	B	B	A	B	A	B	B	B	A	B	A	B	B	B	B	B	B	B	A	A	A	B	B	A	A	B	A	B	B	B
S3_21701867	3	111.58002	B	B	B	A	B	B	A	A	B	A	A	A	B	B	B	B	B	B	B	A	B	A	B	B	B	A	B	A	B	B	B	B	B	B	B	A	A	A	B	B	A	A	B	A	B	B	B
S3_21702014	3	111.58003	B	B	B	A	B	B	A	A	B	A	A	A	B	B	B	B	B	B	B	A	B	A	B	B	B	A	B	A	B	B	B	B	B	B	B	A	A	A	B	B	A	A	B	A	B	B	B
S3_21702609	3	111.58004	B	B	B	A	B	B	A	A	B	A	A	A	B	B	B	B	B	B	B	A	B	A	B	B	B	A	B	A	B	B	B	B	B	B	B	A	A	A	B	B	A	A	B	A	B	B	B
S3_21727269	3	111.58005	B	B	B	A	B	B	A	A	B	A	A	A	B	B	B	B	B	B	B	A	B	A	B	B	B	A	B	A	B	B	B	B	B	B	B	A	A	A	B	B	A	A	B	A	B	B	B
S3_21731388	3	111.58006	B	B	B	A	B	B	A	A	B	A	A	A	B	B	B	B	B	B	B	A	B	A	B	B	B	A	B	A	B	B	B	B	B	B	B	A	A	A	B	B	A	A	B	A	B	B	B
S3_21737733	3	111.58008	B	B	B	A	B	B	A	A	B	A	A	A	B	B	B	B	B	B	B	A	B	A	B	B	B	A	B	A	B	B	B	B	B	B	B	A	A	A	B	B	A	A	B	A	B	B	B
S3_21885816	3	111.58009	B	B	B	A	B	B	A	A	B	A	A	A	B	B	B	B	B	B	B	A	B	A	B	B	B	A	B	A	B	B	B	B	B	B	B	A	A	A	B	B	A	A	B	A	B	B	B
S3_22010494	3	112.12	B	N	B	A	B	B	A	A	B	A	A	A	N	B	B	B	B	B	B	A	B	A	B	B	B	A	B	A	B	B	B	B	B	B	B	A	A	A	B	B	A	A	B	A	B	B	B
S3_22087971	3	112.12001	B	B	B	A	B	B	A	A	B	A	A	A	B	B	B	B	B	B	B	A	B	A	B	B	B	A	B	A	B	B	B	B	B	B	B	A	A	A	B	B	A	A	B	A	B	B	B
S3_22101750	3	112.12002	B	B	B	A	B	B	A	A	B	A	A	A	B	B	B	B	B	B	B	A	B	A	B	B	B	A	B	A	B	B	B	B	B	B	B	A	A	A	B	B	A	A	B	H	B	B	B
S3_22107617	3	112.12003	B	B	B	A	B	B	A	A	B	A	A	A	B	B	B	B	B	B	B	A	B	A	B	B	B	A	B	A	B	B	B	B	B	B	B	A	A	A	B	B	A	A	B	A	B	B	B
S3_22107644	3	112.12004	B	B	B	A	B	B	A	A	B	A	A	A	B	B	B	B	B	B	B	A	B	A	B	B	B	A	B	A	B	B	B	B	B	B	B	A	A	A	B	B	A	A	B	A	B	B	B
S3_22120429	3	112.12005	B	B	B	A	B	B	A	A	B	A	A	A	B	B	B	B	B	B	B	A	B	A	B	B	B	A	B	A	B	B	B	B	B	B	B	A	A	A	B	B	A	A	B	A	B	B	B
S3_22120547	3	112.12006	B	B	B	A	B	B	A	A	B	A	A	A	B	B	B	B	B	B	B	A	B	A	B	B	B	A	B	A	B	B	B	B	B	B	B	A	A	A	B	B	A	A	B	A	B	B	B
S3_22180293	3	112.12007	B	B	B	A	B	B	A	A	B	A	A	A	B	B	B	B	B	B	B	A	B	A	B	B	B	A	B	A	B	B	B	B	B	B	A	A	A	A	B	B	A	A	B	A	B	B	B
S3_22212765	3	112.12008	B	B	B	A	B	B	A	A	B	A	A	A	B	B	B	B	B	B	B	A	B	A	B	B	B	A	B	A	B	B	B	B	B	B	A	A	A	A	B	B	A	A	B	A	B	B	B
S3_22272112	3	112.12009	B	B	B	A	B	B	A	A	B	A	A	A	B	B	B	B	B	B	B	A	B	A	B	B	B	A	B	A	B	B	B	B	B	B	A	A	A	A	B	B	A	A	B	A	B	B	B
S3_22480825	3	112.2	B	B	B	A	B	B	A	A	B	A	A	A	B	B	B	B	B	B	B	A	B	A	B	B	B	A	B	A	B	B	B	B	B	B	A	A	A	A	B	B	A	A	B	A	B	B	B
S3_22480827	3	112.20001	B	B	B	A	B	B	A	A	B	A	A	A	B	B	B	B	B	B	B	A	B	A	B	B	B	A	B	A	B	B	B	B	B	B	A	A	A	A	B	B	A	A	B	A	B	B	B
S3_22480828	3	112.20002	B	B	B	A	B	B	A	A	B	A	A	A	B	B	B	B	B	B	B	A	B	A	B	B	B	A	B	A	B	B	B	B	B	B	A	A	A	A	B	B	A	A	B	A	B	B	B
S3_22480917	3	112.20003	B	B	B	A	B	B	A	A	B	A	A	A	B	B	B	B	B	B	B	A	B	A	B	B	B	A	B	A	B	B	B	B	B	B	A	A	A	A	B	B	A	A	B	A	B	B	B
S3_22511181	3	112.20004	B	B	B	A	B	B	A	A	B	A	A	A	B	B	B	B	B	B	B	A	B	A	B	B	B	A	B	A	B	B	B	B	B	B	A	A	A	A	B	B	A	A	B	A	B	B	B
S3_22511501	3	112.20005	B	B	B	A	B	B	A	H	B	A	A	A	B	B	B	B	B	B	B	A	B	A	B	B	B	A	B	A	B	B	B	B	B	B	A	A	A	A	B	B	A	A	B	A	B	B	B
S3_22511514	3	112.20006	B	B	B	A	B	B	A	A	B	A	A	A	B	B	B	B	B	B	B	A	B	A	B	B	B	A	B	A	B	B	B	B	B	B	A	A	A	A	B	B	A	A	B	A	B	B	B
S3_22692189	3	112.62	B	B	B	A	B	B	A	A	B	A	A	A	B	B	B	N	B	B	B	A	B	A	B	B	B	A	B	A	B	B	B	B	B	B	A	A	A	A	B	B	A	A	B	A	B	N	B
S3_22692200	3	112.62001	B	B	B	A	B	B	A	A	B	A	A	A	B	B	B	N	B	B	B	A	B	A	B	B	B	A	B	A	B	B	B	B	B	B	A	A	A	A	B	B	A	A	B	A	B	N	B
S3_22783339	3	113.06	B	B	B	A	B	B	A	A	B	A	A	A	B	B	B	B	B	B	B	A	B	A	B	B	B	A	B	A	B	B	B	B	B	B	A	A	A	A	B	B	A	A	B	A	B	B	B
S3_22783348	3	113.06001	B	B	B	A	B	B	A	A	B	A	A	A	B	B	B	B	B	B	B	A	B	A	B	B	B	A	B	A	B	B	B	B	B	B	A	A	A	A	B	B	A	A	B	A	B	B	B
S3_22796296	3	113.2	B	B	B	A	B	B	N	A	B	A	N	A	B	B	B	B	B	B	B	A	B	N	B	B	B	A	B	A	B	B	B	B	B	B	A	A	A	A	B	B	A	A	B	A	B	B	B
S3_22803756	3	113.20001	B	B	B	A	B	B	A	A	B	H	A	A	B	B	B	B	B	B	B	A	B	A	B	B	B	A	B	A	B	B	B	B	B	B	A	A	A	A	B	B	A	A	B	A	B	B	B
S3_22817840	3	113.20002	B	B	B	A	B	B	A	A	B	A	A	A	B	B	B	B	B	B	B	A	B	A	B	B	B	A	B	A	B	B	B	B	B	H	A	A	A	A	B	B	A	A	B	A	B	B	B
S3_22817844	3	113.20003	B	B	B	A	B	B	A	A	B	A	A	A	B	B	B	B	B	B	B	A	B	A	B	B	B	A	B	A	B	B	B	B	B	H	A	A	A	A	B	B	A	A	B	A	B	B	B
S3_22857186	3	113.27	B	B	B	A	B	B	A	A	B	A	A	A	B	B	B	B	B	B	B	A	B	A	B	B	B	A	B	A	B	B	B	B	B	B	A	A	A	A	B	B	A	A	B	A	B	B	B
S3_22869470	3	113.3	B	B	B	A	B	B	A	A	B	A	A	A	B	B	B	B	B	B	B	A	B	A	B	B	B	A	B	A	B	B	B	B	B	B	A	A	A	A	B	B	A	A	B	A	B	B	B
S3_22869481	3	113.30001	B	B	B	A	B	B	A	A	B	A	A	A	B	B	B	B	B	B	B	A	B	A	B	B	B	A	B	A	B	B	B	B	B	B	A	A	A	A	B	B	A	A	B	A	B	B	B
S3_23125034	3	113.96	B	B	B	A	B	B	A	A	B	A	A	A	B	B	B	B	B	B	B	A	B	A	B	B	B	A	B	A	B	B	B	B	B	B	A	A	A	A	B	B	A	A	B	A	B	B	B
S3_23153229	3	113.98	B	B	B	A	B	B	A	A	B	A	A	A	B	B	B	B	B	B	B	A	B	A	B	B	B	A	B	A	B	B	B	B	B	B	A	A	A	A	B	B	A	A	B	A	B	B	B
S3_23221367	3	114.04	B	B	B	A	B	B	A	A	B	A	A	A	B	B	B	B	B	B	B	A	B	A	B	B	B	A	B	A	B	B	B	B	B	B	A	A	A	A	B	B	A	A	B	A	B	B	B
S3_23221368	3	114.04001	B	B	B	A	B	B	A	A	B	A	A	A	B	B	B	B	B	B	B	A	B	A	B	B	B	A	B	A	B	B	B	B	B	B	A	A	A	A	B	B	A	A	B	A	B	B	B
S3_23341905	3	114.16	B	B	B	A	B	B	A	A	B	A	A	A	B	B	B	B	B	B	B	A	B	A	B	B	B	A	B	A	B	B	B	B	B	B	A	A	A	A	B	B	A	A	B	A	B	B	B
S3_23475164	3	114.98	B	B	B	A	B	B	A	A	B	A	A	A	B	B	B	B	B	B	B	A	B	A	B	B	B	A	B	A	B	B	B	B	B	B	A	A	A	A	B	B	A	A	B	A	B	B	B
S3_23589926	3	115.24	B	B	B	N	B	B	A	A	B	A	A	A	B	B	B	B	B	B	B	A	B	A	B	B	B	A	B	A	B	B	B	B	B	B	A	A	A	A	B	B	N	A	B	A	B	B	B
S3_23589931	3	115.24001	B	B	B	N	B	B	A	A	B	A	A	A	B	B	B	B	B	B	B	A	B	A	B	B	B	A	B	A	B	B	B	B	B	B	A	A	A	A	B	B	N	A	B	A	B	B	B
S3_23736182	3	115.72	B	B	B	A	B	B	A	A	B	A	A	A	B	B	B	B	B	B	B	A	B	A	B	B	B	A	B	A	B	B	B	B	B	B	A	A	A	A	B	B	A	A	B	A	B	A	B
S3_24263379	3	117.84	B	B	B	A	A	A	A	A	B	A	A	A	B	B	B	B	B	B	B	A	B	A	B	B	B	A	B	A	B	B	B	B	B	B	A	A	A	A	B	B	A	B	B	A	B	A	B
S3_24476006	3	118.46	B	B	B	A	A	A	A	A	B	A	A	A	B	A	A	B	B	B	B	A	B	A	B	B	B	A	B	A	B	B	A	B	B	A	A	A	A	A	B	B	A	B	B	B	B	A	B
S3_24476758	3	118.46001	B	B	B	A	A	A	A	A	B	A	A	A	B	A	A	B	B	B	B	A	B	A	B	B	B	A	B	A	B	B	A	B	B	A	A	A	A	A	B	B	A	B	B	B	B	A	B
S3_24662731	3	120.1	B	B	B	A	A	A	A	A	B	A	B	A	B	A	A	B	B	B	B	A	B	A	B	B	B	A	B	A	B	B	A	B	B	A	A	A	A	A	B	B	A	B	B	B	B	A	B
S3_24698032	3	120.43	B	B	B	A	A	A	A	A	B	A	B	A	B	A	A	B	B	B	B	A	B	A	B	B	B	A	A	A	B	B	A	B	B	A	A	A	A	A	B	B	A	B	B	B	B	A	B
S3_24702083	3	120.5	B	N	B	A	A	A	A	A	B	A	B	A	B	A	A	B	B	B	B	A	B	A	B	B	B	A	A	N	B	B	A	B	B	A	A	A	A	A	B	B	A	B	B	B	B	A	B
S3_24836520	3	121.23	B	B	B	A	A	A	A	A	B	A	N	A	B	A	A	B	B	N	B	A	B	A	B	B	B	A	A	A	B	B	A	B	B	A	A	N	A	A	B	B	A	B	B	B	B	A	B
S3_24882547	3	121.33	B	B	B	A	B	A	A	A	B	A	B	A	B	A	A	B	B	B	B	A	B	A	B	B	B	A	A	A	B	B	A	B	B	A	A	A	A	A	B	B	A	B	B	B	B	A	B
S3_24996649	3	121.72	B	B	B	A	B	A	A	A	B	A	B	A	B	A	A	B	B	B	B	A	B	A	B	B	B	A	A	A	B	B	A	B	B	A	A	A	A	A	B	B	A	B	B	B	B	A	B
S3_25007210	3	121.75	B	B	B	A	B	A	A	A	B	A	B	A	B	A	A	B	B	B	B	A	B	A	B	B	B	A	A	A	B	B	A	B	B	A	A	A	A	A	B	B	A	B	B	B	B	A	B
S3_25074645	3	122.34	B	B	N	A	B	A	A	A	B	A	B	A	B	A	A	B	B	B	B	A	B	A	B	B	B	A	A	A	B	B	A	B	B	A	A	N	A	A	B	B	A	B	B	B	B	A	B
S3_25104409	3	123.35	B	B	B	A	B	A	A	A	B	A	B	A	B	A	A	B	B	B	B	A	B	A	B	B	B	A	A	A	B	B	A	B	B	A	A	A	A	A	B	B	A	B	B	B	B	A	B
S3_25236771	3	128.86	B	B	B	A	B	A	B	A	B	A	B	A	B	B	B	B	B	B	B	A	B	A	A	B	B	A	A	B	B	B	A	B	B	B	A	A	A	A	B	B	A	B	B	B	B	A	B
S3_26262467	3	136.04	B	B	B	A	B	A	B	A	B	A	B	A	B	B	B	B	B	B	B	A	B	A	A	B	B	A	A	B	B	B	A	B	B	B	A	A	A	A	B	B	A	B	B	B	B	A	B
S3_26298340	3	136.14	B	B	B	A	B	A	B	A	B	A	B	A	B	B	B	B	B	B	B	A	B	A	A	B	B	A	A	B	B	B	A	B	B	B	A	A	A	A	B	B	A	B	B	B	B	A	B
S3_26425218	3	137.17	B	B	B	A	B	A	B	B	B	A	B	A	B	B	B	B	B	B	B	A	B	A	A	B	B	A	A	B	B	B	A	B	B	B	A	A	A	A	B	B	A	B	B	B	B	A	B
S3_26433824	3	137.2	B	B	B	A	B	A	B	B	B	A	B	A	B	B	B	B	B	B	B	A	B	A	A	B	B	A	A	B	B	B	A	B	B	B	A	A	A	A	B	B	A	B	B	B	B	A	B
S3_26466205	3	137.28	B	B	B	A	B	A	B	B	B	A	B	A	B	B	B	B	B	B	B	A	B	A	A	B	B	A	A	B	B	B	A	B	B	B	A	A	A	A	B	B	A	B	B	B	B	A	B
S3_26538597	3	137.82	B	B	B	A	B	A	B	B	B	A	B	A	B	B	B	B	B	B	B	A	B	A	A	B	B	A	A	B	B	B	A	B	B	B	A	A	A	A	B	A	A	B	B	B	B	A	B
S3_26542118	3	137.83	B	B	B	A	B	A	B	B	B	A	B	A	B	B	B	B	B	B	B	A	B	A	A	B	B	A	A	B	B	B	A	B	B	B	A	A	A	A	B	A	A	B	B	B	B	A	B
S3_26543592	3	137.87	B	B	B	A	B	A	B	B	B	A	B	A	B	B	B	B	B	B	B	A	B	A	A	B	B	A	A	B	B	B	A	B	B	B	A	A	A	A	B	A	A	B	B	B	B	A	B
S3_26543639	3	137.87001	B	B	B	A	B	A	B	B	B	A	B	A	B	B	B	B	B	B	B	A	B	A	A	B	B	A	A	B	B	B	A	B	B	B	A	A	A	A	B	A	A	B	B	B	B	A	B
S3_26581691	3	138.22	B	B	B	A	B	A	B	B	B	A	B	A	B	B	B	B	B	B	B	A	B	A	A	B	B	A	A	B	B	B	A	B	B	B	A	A	A	A	B	A	A	B	B	B	B	A	B
S3_26584245	3	138.22001	B	B	B	A	B	A	B	B	B	A	B	A	B	B	B	B	N	B	B	A	B	A	A	B	B	A	A	B	B	B	A	B	B	B	A	A	A	A	B	A	A	B	B	B	B	A	B
S3_26584670	3	138.22002	B	B	B	A	B	A	B	B	B	A	B	A	B	B	B	B	B	B	B	A	B	A	A	B	B	A	A	B	B	B	A	B	B	B	A	A	A	A	B	A	A	B	B	B	B	A	B
S3_26584753	3	138.22003	B	B	B	A	B	A	B	B	B	A	B	A	B	B	B	B	B	B	B	A	B	A	A	B	B	A	A	B	B	B	A	B	B	B	A	A	A	A	B	A	A	B	B	B	B	A	B
S3_26597830	3	138.31	B	A	B	A	B	A	B	B	B	A	B	A	B	B	B	B	B	B	B	A	B	A	A	B	B	A	A	B	B	B	A	B	B	B	A	A	A	A	B	A	A	B	B	B	B	A	B
S3_26705619	3	139.22	B	A	B	A	B	A	B	B	B	A	B	A	B	B	B	B	B	B	B	A	B	A	A	B	B	A	A	B	B	B	A	B	B	B	A	A	A	A	B	A	A	B	B	B	B	A	B
S3_26709038	3	139.22001	B	A	B	A	B	A	B	B	B	A	B	A	B	B	B	B	B	B	B	A	B	A	A	B	B	A	A	B	B	B	A	B	B	B	A	A	A	A	B	A	A	B	B	B	B	A	B
S3_26716511	3	139.22002	B	A	B	A	B	A	B	B	B	A	B	A	B	B	B	B	B	B	B	A	B	A	A	B	B	A	A	B	B	B	A	B	B	B	A	A	A	A	B	A	A	B	B	B	B	A	B
S3_26740679	3	139.95	B	A	B	A	B	A	B	B	B	A	B	A	B	B	B	B	B	B	B	A	B	A	A	B	B	A	A	B	B	B	A	B	B	B	A	A	A	A	B	A	A	B	B	B	B	A	B
S3_26757732	3	139.95001	B	A	B	A	B	A	B	B	B	A	B	A	B	B	B	B	B	B	B	A	B	A	A	B	B	A	A	B	B	B	A	B	B	B	A	A	A	A	B	A	A	B	B	B	B	A	B
S3_26781304	3	140.19	B	A	B	A	B	A	B	B	B	A	B	A	B	B	B	B	B	B	B	A	B	A	A	B	B	A	A	B	B	B	A	B	B	B	A	A	A	A	B	A	A	B	B	B	B	A	B
S3_26782759	3	140.19001	B	A	B	A	B	A	B	B	B	A	B	A	B	B	B	B	B	B	B	A	B	A	A	B	B	A	A	B	B	B	A	B	B	B	A	A	A	A	B	A	A	B	B	B	B	A	B
S3_26788807	3	140.21	B	A	B	A	B	A	B	B	B	A	B	A	B	B	B	B	B	B	B	A	B	A	A	B	B	A	A	B	B	B	A	B	B	B	A	A	A	A	B	A	A	B	B	B	B	A	B
S3_26788814	3	140.21001	B	A	B	A	B	A	B	B	B	A	B	A	B	B	B	B	B	B	B	A	B	A	A	B	B	A	A	B	B	B	A	B	B	B	A	A	A	A	B	A	A	B	B	B	B	A	B
S3_27144252	3	141.61	B	A	N	A	B	A	B	B	B	A	B	A	B	B	B	B	B	B	B	A	H	A	A	B	A	A	A	B	B	B	A	B	B	B	B	A	A	A	B	A	A	B	B	B	B	A	A
S3_27144285	3	141.61001	B	A	N	A	B	A	B	B	B	A	B	A	B	B	B	B	B	B	B	A	H	A	A	B	A	A	A	B	B	B	A	B	B	B	B	A	A	A	B	A	A	B	B	B	B	A	A
S3_27161199	3	141.65	B	A	B	A	B	A	B	B	B	A	B	A	B	B	B	B	B	B	B	A	H	A	A	B	A	A	A	B	B	B	A	B	B	B	B	A	A	A	B	H	A	B	B	B	B	A	A
S3_27233510	3	142.17	B	A	B	A	B	A	B	B	B	A	B	A	B	B	B	B	B	B	B	A	H	A	A	A	A	A	A	B	B	B	A	B	B	B	B	A	A	A	B	H	A	B	B	B	B	A	A
S3_27520616	3	143.13	B	A	B	A	B	A	B	B	B	A	B	A	B	B	B	B	B	B	B	A	H	A	A	A	A	A	H	B	B	A	A	B	B	B	B	A	A	A	B	H	A	B	B	B	B	A	A
S3_27548383	3	143.32	B	A	B	A	B	A	B	B	B	A	B	A	B	B	B	B	B	B	B	A	H	A	A	A	A	A	H	B	B	A	A	B	B	B	B	A	A	A	B	H	A	B	B	B	B	A	A
S3_27581605	3	143.47	B	N	B	A	B	A	B	B	B	A	B	A	B	B	B	B	B	B	B	A	H	A	A	N	A	A	H	B	B	A	A	B	B	B	B	A	A	A	B	B	A	B	B	B	B	A	A
S3_27616946	3	143.68	B	A	B	A	B	A	B	B	B	A	B	A	B	B	B	B	B	B	B	A	H	A	A	A	A	A	H	B	B	A	A	B	B	B	B	A	A	A	B	H	A	B	B	B	B	A	A
S3_27624540	3	143.72	B	A	B	A	B	A	B	B	B	A	B	A	B	B	B	B	B	B	B	A	H	A	A	A	A	A	H	B	B	A	A	B	B	B	B	A	A	A	B	H	A	B	B	B	B	A	H
S3_27624542	3	143.72001	B	A	B	A	B	A	B	B	B	A	B	A	B	B	B	B	B	B	B	A	H	A	A	A	A	A	H	B	B	A	A	B	B	B	B	A	A	A	B	H	A	B	B	B	B	A	A
S3_27630404	3	143.72002	B	A	B	A	B	A	B	B	B	A	B	A	B	B	B	B	B	B	B	A	B	A	A	A	A	A	A	B	B	N	A	B	B	B	B	A	A	A	B	H	A	B	B	B	B	A	A
S3_27630415	3	143.72003	B	A	B	A	B	A	B	B	B	A	B	A	B	B	B	B	B	B	B	A	H	A	A	A	A	A	A	B	B	A	A	B	B	B	B	A	A	A	B	H	A	B	B	B	B	A	A
S3_27630427	3	143.72004	B	A	B	A	B	A	B	B	B	A	B	A	B	B	B	B	B	B	B	A	H	A	A	A	A	A	A	B	B	A	A	B	B	B	B	A	A	A	B	H	A	B	B	B	B	A	A
S3_27646845	3	143.77	B	A	B	A	B	A	B	B	B	A	B	A	B	B	B	B	B	B	B	A	H	A	A	A	A	A	H	B	B	A	A	B	B	B	B	A	A	A	B	H	A	B	B	B	B	A	A
S3_27647889	3	143.77001	B	A	B	A	B	A	B	B	B	A	B	A	B	B	B	B	B	B	B	A	H	A	A	A	A	A	H	B	B	A	A	B	B	B	B	A	A	A	B	H	A	B	B	B	B	A	A
S3_27816666	3	144.88	B	A	B	A	B	A	B	B	B	A	B	A	B	B	B	B	B	B	B	A	H	A	A	A	A	A	H	B	B	A	A	B	B	B	B	A	A	A	B	H	A	B	H	B	B	A	A
S3_27836927	3	144.94	B	A	B	A	B	A	B	B	B	A	B	A	B	B	B	B	B	B	B	A	H	A	A	A	A	A	H	B	B	A	A	B	B	B	B	A	A	A	B	H	A	B	B	B	B	A	A
S3_27844036	3	144.95	B	A	B	A	B	A	B	B	B	A	B	A	B	B	B	B	B	B	B	A	H	A	A	A	A	A	H	B	B	A	A	B	B	B	B	A	A	A	B	H	A	B	B	B	B	A	A
S3_27890327	3	144.95001	B	A	B	A	B	A	B	B	B	A	B	A	B	B	B	B	B	B	B	A	H	A	A	A	A	A	H	B	B	A	A	B	B	B	B	A	A	A	B	H	A	B	B	B	B	A	A
S3_27918748	3	145	B	A	B	A	B	A	B	B	B	A	B	A	B	B	B	B	B	B	B	A	H	A	A	A	A	A	A	B	B	A	A	B	B	B	B	A	A	A	B	H	A	B	B	B	B	A	A
S3_28003966	3	145.03	B	A	B	A	B	A	B	B	B	A	B	A	B	B	B	B	B	B	B	A	H	A	A	A	A	A	H	B	B	A	A	B	B	B	B	A	A	A	B	H	A	B	B	B	B	A	A
S3_28035117	3	145.05	B	A	B	A	B	A	B	B	B	A	B	A	B	B	B	B	B	B	N	A	H	A	A	A	A	A	H	B	B	A	A	B	B	B	B	A	A	A	B	H	A	B	B	B	B	A	A
S3_28098531	3	145.1	B	A	B	A	B	A	B	B	B	A	B	A	B	B	B	B	B	B	B	A	H	A	A	A	A	A	H	B	B	A	A	B	B	B	B	A	A	A	B	H	A	B	B	B	B	A	A
S3_28113683	3	145.10001	B	A	B	A	B	A	B	B	B	A	B	A	B	B	B	B	B	B	B	A	H	A	A	A	A	A	B	B	B	A	A	B	B	B	B	A	A	A	B	H	A	B	B	B	B	A	A
S3_28115749	3	145.10002	B	A	B	A	B	A	B	B	B	A	B	A	B	B	B	B	B	B	B	A	H	A	A	A	A	A	H	B	B	A	A	B	B	B	B	A	A	A	B	H	A	B	B	B	B	A	A
S3_28162926	3	145.10003	B	A	B	A	B	A	B	B	B	A	B	A	B	B	B	B	B	B	B	A	H	A	A	A	A	A	H	B	B	A	A	B	B	B	B	A	A	A	B	A	A	B	B	B	B	A	A
S3_28162931	3	145.10004	B	A	B	A	B	A	B	B	B	A	B	A	B	B	B	B	B	B	B	A	H	A	A	A	A	A	H	B	B	A	A	B	B	B	B	A	A	A	B	A	A	B	B	B	B	A	A
S3_28188169	3	145.18	B	A	B	A	B	A	B	B	B	A	N	A	B	B	B	B	B	B	B	A	H	A	A	A	A	A	H	B	B	A	A	B	N	B	B	N	A	A	B	H	A	B	B	B	B	A	A
S3_28192022	3	145.18001	B	A	B	A	B	A	B	B	B	A	B	A	B	B	B	B	B	B	B	A	H	A	A	A	A	A	H	B	B	A	A	B	B	B	B	A	A	A	B	H	A	B	B	B	B	A	A
S3_28192068	3	145.18002	B	A	B	A	B	A	B	B	B	A	B	A	B	B	B	B	B	B	B	A	H	A	A	A	A	A	H	B	B	A	A	B	B	B	B	A	A	A	B	H	A	B	B	B	B	A	A
S3_28196568	3	145.18003	B	A	B	A	B	A	B	B	B	A	B	A	B	B	B	B	B	B	B	A	H	A	A	A	A	A	H	B	B	A	A	B	B	B	B	A	A	A	B	H	A	B	B	B	B	A	A
S3_28196599	3	145.18004	B	A	B	A	B	A	B	B	B	A	B	A	B	B	B	B	B	B	B	A	H	A	A	A	A	A	H	B	B	A	A	B	B	B	B	A	A	A	B	H	A	B	B	B	B	A	A
S3_28239591	3	145.18005	B	A	B	A	B	A	B	B	B	A	B	A	B	B	B	B	B	B	B	N	H	A	A	A	A	A	H	B	B	A	A	B	B	B	B	A	A	A	B	H	A	B	B	B	B	A	A
S3_28239597	3	145.18006	B	A	B	A	B	A	B	B	B	A	B	A	B	B	B	B	B	B	B	N	H	A	A	A	A	A	H	B	B	A	A	B	B	B	B	A	A	A	B	H	A	B	B	B	B	A	A
S3_28311856	3	145.19	B	A	B	A	B	A	B	B	B	A	B	A	B	B	B	B	B	B	B	A	H	A	A	A	A	A	H	B	B	A	A	B	B	B	B	A	A	A	B	H	A	B	B	B	B	A	A
S3_28311860	3	145.19001	B	A	B	A	B	A	B	B	B	A	B	A	B	B	B	B	B	B	B	A	H	A	A	A	A	A	H	B	B	A	A	B	B	B	B	A	A	A	B	H	A	B	B	B	B	A	A
S3_28456187	3	146.04	B	A	B	A	B	A	B	B	B	A	B	A	B	B	B	B	B	B	B	A	H	A	A	A	A	A	H	B	B	A	A	B	B	B	B	A	A	A	B	H	A	B	B	B	B	A	A
S3_28513406	3	147.73	B	A	B	A	B	A	B	B	B	A	B	A	B	B	B	B	B	B	B	A	H	A	A	A	A	A	H	B	B	A	A	B	B	B	B	A	A	A	B	H	A	B	B	B	B	A	A
S3_28529769	3	147.73001	B	A	B	A	B	A	B	B	B	A	B	A	B	B	B	B	B	B	B	A	H	A	A	A	A	A	H	B	B	A	A	B	B	B	B	A	A	A	B	H	A	B	B	B	B	A	A
S3_28529790	3	147.73002	B	A	B	A	B	A	B	B	B	A	B	A	B	B	B	B	B	B	B	A	H	A	A	A	A	A	H	B	B	A	A	B	B	B	B	A	A	A	B	H	A	B	B	B	B	A	A
S3_28533036	3	147.73003	B	A	B	A	B	A	B	B	B	A	B	A	B	B	B	B	B	B	B	A	H	A	A	A	A	A	H	B	B	A	A	B	B	B	B	A	A	A	B	H	A	B	B	B	B	A	A
S3_28752359	3	148.61	B	A	B	A	B	A	B	B	B	A	B	A	B	B	B	B	B	B	B	A	H	A	A	A	A	A	H	B	B	A	A	B	B	B	B	A	A	A	B	H	A	B	B	B	B	A	A
S3_28752450	3	148.61001	B	A	B	A	B	A	B	B	B	A	B	A	B	B	B	B	B	B	B	A	H	A	A	A	A	A	B	B	B	A	A	B	B	N	B	A	A	A	B	H	A	B	B	B	B	A	A
S3_28761692	3	148.71	B	A	B	A	B	A	B	B	B	A	B	A	B	B	B	B	B	B	B	A	H	A	A	A	A	A	H	B	B	A	A	B	B	B	B	A	A	A	B	H	A	B	B	B	B	A	A
S3_28761694	3	148.71001	B	A	B	A	B	A	B	B	B	A	B	A	B	B	B	B	B	B	B	A	H	A	A	A	A	A	H	B	B	A	A	B	B	B	B	A	A	A	B	H	A	B	H	B	B	A	A
S3_28764062	3	148.71002	B	A	B	A	B	A	B	B	B	A	B	A	B	B	B	B	B	B	B	A	H	A	A	A	A	A	H	B	B	A	A	B	B	B	B	A	A	A	B	H	A	B	B	B	B	A	A
S3_28770271	3	148.71003	B	A	B	H	B	A	B	B	B	A	B	A	B	B	B	B	B	B	B	A	H	A	A	A	A	A	H	B	B	A	A	B	B	B	B	A	A	A	B	H	A	B	B	B	B	A	A
S3_28875914	3	149.34	B	A	B	H	B	B	B	B	B	A	B	A	B	B	B	B	B	B	B	A	H	A	A	A	A	A	B	B	B	A	A	B	B	B	B	A	A	A	B	H	A	B	B	B	B	A	A
S3_28876046	3	149.34001	B	A	B	H	B	B	B	B	B	A	B	A	B	B	B	B	B	B	B	A	H	A	A	A	A	A	B	B	B	A	A	B	B	B	B	A	A	A	B	H	A	B	B	B	B	A	A
S3_29210597	3	151.26	B	A	B	B	A	B	B	A	B	A	B	A	B	B	B	B	B	B	B	A	B	A	A	A	A	A	B	B	B	A	B	B	B	B	A	A	B	A	B	B	A	B	B	B	B	A	A
S3_29210822	3	151.26001	B	A	B	H	A	B	B	A	B	A	B	A	B	B	B	B	B	B	B	A	H	A	A	A	A	A	B	B	B	A	B	B	B	B	A	A	H	A	B	B	A	B	B	B	B	A	A
S3_29240341	3	151.42	B	A	B	H	A	B	B	A	B	A	B	A	B	B	B	B	B	B	B	A	H	A	A	A	A	A	B	B	B	A	B	B	B	B	A	A	H	A	B	H	A	B	B	B	B	A	A
S3_29261284	3	151.54	B	A	B	H	A	B	B	A	B	A	B	A	B	B	B	B	B	B	B	A	H	A	A	A	A	A	B	B	B	A	B	B	B	B	A	A	H	A	B	H	A	B	B	B	B	A	A
S3_29273641	3	151.57	B	A	B	H	A	B	B	A	B	A	B	A	B	B	B	B	B	B	B	A	B	A	A	A	A	A	B	B	B	A	H	B	B	B	A	A	H	A	B	H	A	B	B	B	B	A	A
S3_29273695	3	151.57001	B	N	B	H	A	B	B	A	B	A	B	A	B	B	B	B	B	B	B	A	A	A	A	A	A	A	B	B	B	A	B	B	B	B	A	A	H	A	B	H	A	B	B	B	B	A	A
S3_29366543	3	151.82	B	A	B	H	A	B	B	A	B	A	B	A	B	B	B	B	B	B	B	A	H	A	A	A	A	A	B	A	B	A	B	B	B	B	A	A	H	A	B	H	A	B	B	B	B	A	A
S3_29366619	3	151.82001	B	A	B	H	A	B	B	A	B	A	B	A	B	B	B	B	B	B	B	A	H	A	A	A	A	A	B	A	B	A	B	B	B	B	A	A	H	A	B	H	A	B	B	B	B	A	A
S3_29395675	3	151.84	B	A	B	H	A	B	B	A	B	A	B	A	B	B	B	B	B	B	B	A	H	A	A	A	A	A	B	A	B	A	B	B	B	B	A	A	H	A	B	H	A	B	B	B	B	A	A
S3_29395679	3	151.84001	B	A	B	H	A	B	B	A	B	A	B	A	B	B	B	B	B	B	B	A	H	A	A	A	A	A	B	A	B	A	B	B	B	B	A	A	H	A	B	H	A	B	B	B	B	A	A
S3_29402224	3	151.85	B	A	B	H	A	B	B	A	B	A	B	A	B	B	B	B	B	B	B	A	A	A	N	A	A	A	B	A	B	A	B	B	B	B	A	A	H	A	B	H	A	B	B	B	B	A	A
S3_29402382	3	151.85001	B	A	B	H	A	B	B	A	B	A	B	A	B	B	B	B	B	B	B	A	H	A	A	A	A	A	B	A	B	A	B	B	B	B	A	A	H	A	B	H	A	B	B	B	B	A	A
S3_29440628	3	152.52	B	A	B	B	A	B	B	A	B	A	B	A	B	B	B	A	B	B	B	A	H	A	A	A	A	A	B	A	B	A	B	B	B	B	A	A	H	A	B	H	A	B	B	B	B	A	A
S3_29579192	3	153.59	B	A	B	B	A	B	B	A	B	A	B	A	B	B	B	A	B	B	A	A	H	A	A	A	A	A	B	A	B	A	B	B	B	B	A	A	H	A	B	A	A	B	B	B	B	A	A
S3_29589724	3	153.62	B	A	B	B	A	B	B	A	B	A	B	N	B	B	B	A	B	B	N	A	H	A	A	A	A	A	B	A	B	A	B	B	B	B	A	A	B	A	B	A	A	B	B	B	B	A	A
S3_29591210	3	153.62001	B	A	B	B	A	B	B	A	B	A	B	A	B	B	B	A	B	B	A	A	H	A	A	A	A	A	B	A	B	A	B	B	B	B	A	A	B	A	B	A	A	B	B	B	B	A	A
S3_29596443	3	153.64	B	A	B	B	A	B	B	A	B	A	B	A	B	B	B	A	B	B	A	A	H	A	A	A	A	A	B	A	B	A	B	B	B	B	A	A	B	A	B	A	A	B	B	H	B	A	A
S3_29605649	3	153.67	B	A	B	B	A	B	B	A	B	A	B	A	B	B	B	A	B	B	A	A	H	A	A	A	A	A	B	A	B	A	B	B	B	B	A	A	B	A	B	A	A	B	B	B	B	A	A
S3_29613916	3	153.69	B	A	B	B	A	B	B	A	B	A	B	A	B	B	B	A	B	B	A	A	H	A	A	A	A	A	B	A	B	A	B	B	B	B	A	A	B	A	B	A	A	B	B	B	B	A	A
S3_29614230	3	153.69001	B	A	B	B	A	B	B	A	B	A	B	A	B	B	B	A	B	B	A	A	A	A	A	A	A	A	B	A	B	A	B	B	B	B	A	A	B	A	B	A	A	B	B	B	B	A	A
S3_29663197	3	153.89	B	A	B	B	A	B	B	A	B	A	B	A	B	B	B	A	B	B	A	A	H	A	A	A	A	A	B	A	B	A	B	B	B	B	A	A	B	A	B	A	A	B	B	B	B	A	A
S3_29663327	3	153.89001	B	A	B	B	A	B	B	A	B	A	B	A	B	B	B	A	B	B	A	A	H	A	A	A	A	A	B	A	B	A	B	B	B	B	A	A	B	A	B	A	A	B	B	B	B	A	A
S3_29686521	3	154.12	N	A	B	B	A	B	B	A	B	A	B	A	N	B	B	A	B	B	A	A	H	A	A	A	A	A	B	A	N	A	B	B	N	B	A	A	B	A	B	A	A	B	B	B	B	A	A
S3_30407838	3	158.28	A	A	B	B	A	B	B	A	B	A	B	A	B	B	B	A	B	A	A	A	H	A	A	A	A	A	B	A	B	A	B	B	B	B	A	A	B	A	B	A	A	B	B	B	B	A	A
S3_30459963	3	159.42	A	A	B	B	A	B	B	A	A	A	B	A	B	B	B	A	B	A	A	A	H	A	A	A	A	A	B	A	B	A	B	B	B	B	A	A	B	A	B	A	A	B	B	B	B	A	A
S3_30499464	3	159.52	A	A	B	B	A	B	B	A	A	A	B	A	B	B	B	A	B	A	A	A	H	A	A	A	A	A	B	A	B	A	B	B	B	B	A	B	B	A	B	A	A	B	B	B	B	A	A
S3_30530508	3	159.62	A	A	N	B	A	N	B	A	A	A	B	A	B	B	B	A	B	A	A	A	H	A	A	A	A	A	B	A	B	A	B	B	B	B	A	B	B	A	B	A	A	B	B	B	B	A	A
S3_30531013	3	159.62001	A	A	B	B	A	B	B	A	A	A	B	A	B	B	B	A	B	A	A	A	H	A	A	A	A	A	B	A	B	A	B	B	B	B	A	B	B	A	B	A	A	B	B	B	B	A	A
S3_30584298	3	160.08	A	A	B	B	A	B	B	A	A	A	B	A	B	B	B	A	B	A	A	A	H	A	A	A	A	A	B	A	B	A	B	B	B	B	A	B	B	A	B	A	A	B	B	B	B	A	A
S3_32063693	3	165.33	A	A	B	N	B	A	B	A	A	A	A	A	B	B	B	A	A	A	B	A	A	A	A	A	A	A	B	A	B	A	B	B	B	B	B	B	B	A	B	A	B	B	B	B	B	B	A
S3_32102495	3	165.5	A	A	B	B	B	A	B	A	A	A	A	A	B	B	B	A	A	A	B	A	A	A	A	A	A	A	B	A	B	A	B	B	B	B	B	B	B	A	B	A	B	B	B	B	B	B	A
S3_32147606	3	165.69	A	A	B	B	B	A	B	A	A	A	A	A	B	B	B	A	A	A	B	A	A	A	A	A	A	A	B	A	B	A	B	B	B	B	B	B	B	A	B	A	B	B	B	B	B	B	H
S3_32161221	3	165.76	A	A	B	B	B	A	B	A	A	A	A	A	B	B	B	A	A	A	B	A	A	A	A	A	A	A	B	A	B	A	B	B	B	B	B	B	B	A	B	A	B	B	B	B	B	B	A
S3_32170554	3	165.81	A	A	B	B	B	A	B	A	A	A	A	A	B	B	B	A	A	A	B	A	A	A	A	A	A	A	B	A	B	A	B	B	B	B	B	B	B	A	B	A	B	B	B	B	B	B	A
S3_32170569	3	165.81001	A	A	B	B	B	A	B	A	A	A	A	A	B	B	B	A	A	A	B	A	A	A	A	A	A	A	B	A	B	A	B	B	B	B	B	B	B	A	B	A	B	B	B	B	B	B	A
S3_32171162	3	165.81002	A	A	B	B	B	A	B	A	A	A	A	A	B	B	B	A	A	A	B	A	A	A	A	A	A	A	B	A	B	A	B	B	B	B	B	B	B	A	B	A	B	B	B	B	B	B	A
S3_32201107	3	165.92	A	A	B	B	N	A	B	A	A	A	A	A	B	B	B	A	N	A	B	A	A	A	N	A	A	A	B	A	B	A	B	B	H	B	B	B	B	A	B	A	B	B	B	B	B	B	A
S3_32255447	3	166.26	A	A	B	B	B	A	B	A	A	A	A	A	B	B	B	A	A	A	B	A	A	A	N	A	A	A	N	A	B	A	B	B	B	B	B	B	B	A	B	A	B	B	B	B	B	B	A
S3_32291011	3	166.51	A	A	B	B	B	A	B	A	A	A	A	A	B	B	B	A	A	A	B	A	A	A	A	A	A	A	B	A	B	A	B	B	B	B	B	B	B	A	B	A	B	B	B	B	B	B	A
S3_32389083	3	167.08	A	A	B	B	B	A	B	A	A	A	A	A	B	B	B	A	A	A	B	A	A	A	A	A	A	A	B	A	B	A	B	B	B	B	B	B	B	A	B	A	B	B	B	B	B	B	A
S3_32389117	3	167.08001	A	A	B	B	B	A	B	A	A	A	A	A	B	B	B	A	A	A	B	A	A	A	A	A	A	A	B	A	B	A	B	B	B	B	B	B	B	A	B	A	B	B	B	B	B	B	A
S3_32389247	3	167.08002	N	A	N	B	B	A	B	A	A	A	N	A	B	B	B	A	A	A	B	A	A	A	A	A	N	A	B	A	B	A	B	B	B	B	B	B	B	A	B	A	B	B	B	N	B	B	N
S3_32391533	3	167.08003	A	A	B	B	B	A	B	A	A	A	N	A	B	B	B	A	A	A	B	A	A	A	A	A	A	A	N	A	B	A	B	B	B	B	B	B	B	A	B	A	B	B	B	B	B	B	A
S3_32422717	3	167.26	A	A	B	B	B	A	B	A	A	A	A	A	B	B	B	A	A	A	B	A	A	A	A	A	A	A	B	A	B	A	B	B	B	B	B	B	B	A	B	A	B	B	B	B	B	B	A
S3_32428109	3	167.29	A	A	B	B	B	A	B	A	A	A	A	A	B	B	B	A	A	A	B	A	A	A	A	A	A	A	B	A	B	A	B	B	B	B	B	B	B	A	B	A	B	B	B	B	B	B	A
S3_32441496	3	167.37	A	A	B	B	B	A	B	A	A	A	A	A	B	B	B	A	A	A	B	A	A	A	A	A	A	A	B	A	B	A	B	B	B	B	B	B	B	A	B	A	B	B	B	B	B	B	A
S3_32660290	3	169.39	A	A	B	B	B	A	B	B	A	A	A	A	B	B	B	A	A	A	B	A	A	A	H	A	A	A	A	A	B	A	B	B	B	B	B	B	B	A	B	A	B	B	B	B	B	B	A
S3_32670618	3	169.48	A	A	B	B	B	A	B	B	A	A	A	A	B	B	B	A	A	A	B	A	A	A	H	A	A	A	A	A	B	A	B	B	B	B	B	B	B	A	B	A	B	B	B	B	B	B	A
S3_32710680	3	169.56	A	A	B	B	B	A	H	B	A	A	A	A	B	B	B	A	A	A	B	A	A	A	H	A	A	A	A	A	B	A	B	B	B	B	B	B	B	A	B	A	B	B	B	B	B	B	A
S3_32731285	3	169.63	A	A	B	B	B	A	B	B	A	A	A	A	B	B	B	A	A	A	B	A	A	A	H	A	A	A	A	A	B	A	B	B	B	B	B	B	B	A	B	A	B	B	B	B	B	B	A
S3_32736790	3	169.64	A	A	B	B	B	A	B	B	A	A	A	A	B	B	B	A	A	A	B	A	A	A	H	A	A	A	A	A	B	A	B	B	B	B	B	B	B	A	B	A	B	B	B	B	B	B	A
S3_32808995	3	169.89	A	A	B	B	B	A	B	B	A	A	A	A	B	B	B	A	A	A	B	A	A	A	H	A	A	A	A	A	B	A	B	B	B	B	B	B	B	A	B	A	B	B	B	B	B	B	A
S3_32852174	3	170.01	A	A	B	B	B	A	B	B	A	A	A	A	B	B	B	A	A	A	B	A	A	A	H	A	A	A	A	A	B	A	B	B	B	B	B	B	B	A	B	A	B	B	B	B	B	B	A
S3_32852286	3	170.01001	A	A	B	B	B	A	B	B	A	A	A	A	B	B	B	A	A	A	B	A	A	A	H	A	A	A	A	A	B	A	B	B	B	B	B	B	B	A	B	A	B	B	B	B	B	B	A
S3_32853781	3	170.01002	A	A	B	B	B	A	B	B	A	A	A	A	B	B	B	A	A	A	B	A	A	A	H	A	A	A	A	A	B	A	B	B	B	B	B	B	B	A	B	A	B	B	B	B	B	B	A
S3_33046007	3	172.21	A	A	B	B	B	A	B	B	A	A	A	A	B	B	B	A	A	A	B	A	A	H	H	A	A	A	A	A	B	A	B	B	B	B	B	B	B	A	B	A	B	B	B	B	B	B	A
S3_33084356	3	172.93	A	A	B	B	B	A	B	B	A	A	A	A	B	B	B	A	A	A	B	A	A	A	H	A	A	A	A	A	B	A	B	B	B	B	B	N	B	A	B	A	B	B	B	B	B	B	A
S3_33091399	3	173.06	A	A	B	B	B	A	B	B	A	A	A	A	B	H	B	A	A	A	B	A	A	A	H	A	A	A	A	A	B	A	B	B	B	B	B	B	B	A	B	A	B	B	B	B	B	B	A
S3_33101203	3	173.25	A	A	B	B	B	A	B	B	A	A	A	A	B	B	B	A	A	A	B	A	A	A	H	A	A	A	A	A	B	A	B	B	B	B	B	B	B	A	B	A	B	B	B	B	B	B	A
S3_33111320	3	173.49	A	A	B	B	B	A	B	B	A	A	A	A	B	B	B	A	A	A	B	A	A	A	H	A	A	A	A	A	B	A	B	B	B	B	B	B	B	A	B	A	B	B	B	B	B	B	A
S3_33204921	3	174.08	A	A	B	B	B	A	B	B	A	A	A	B	B	B	B	A	A	A	B	A	A	A	H	A	A	A	A	A	B	A	B	B	B	B	B	B	B	A	B	A	B	B	B	B	B	B	A
S3_34487907	3	182.32	A	B	B	A	B	B	B	A	A	A	A	B	B	A	A	A	A	A	B	B	A	A	B	A	A	H	A	A	B	A	B	B	A	B	B	B	A	A	B	A	B	B	B	A	B	B	A
S3_34490276	3	182.38	A	B	B	A	B	B	B	A	A	A	A	B	B	A	A	A	A	A	B	B	A	A	B	A	A	H	A	A	B	A	B	B	A	B	B	B	A	A	B	A	B	B	B	A	B	B	A
S3_34496686	3	182.42	A	B	B	A	B	B	B	A	A	A	A	B	B	A	A	A	A	A	B	B	A	A	B	A	A	H	A	A	B	A	B	B	A	B	B	B	A	A	B	A	B	B	B	A	B	B	A
S3_34496690	3	182.42001	A	B	B	A	B	B	B	A	A	A	A	B	B	A	A	A	A	A	B	B	A	A	B	A	A	H	A	A	B	A	B	B	A	B	B	B	A	A	B	A	B	B	B	A	B	B	A
S3_34502917	3	182.47	A	H	B	A	B	B	B	A	A	A	A	B	B	A	A	A	A	A	B	B	A	A	B	A	A	B	A	A	B	A	B	B	A	B	B	B	A	A	B	A	B	B	B	A	B	B	A
S3_34510936	3	182.53	A	B	B	A	B	B	B	A	A	A	A	B	B	A	A	A	A	A	B	B	A	A	B	A	A	H	A	A	B	A	B	B	A	B	B	B	A	A	B	A	B	B	B	A	B	B	A
S3_34521908	3	182.54	A	B	B	A	B	B	B	A	A	A	A	B	B	A	A	A	A	A	B	B	A	A	B	A	A	H	A	A	B	A	B	B	A	B	B	B	A	A	B	A	B	B	B	A	B	B	A
S3_34574764	3	182.60001	A	B	B	A	B	B	B	A	A	A	A	B	B	A	A	A	A	A	B	B	A	A	B	A	A	H	A	A	B	A	B	B	A	B	B	B	A	A	B	A	B	B	B	A	B	B	A
S3_34596419	3	182.64	A	B	B	A	B	B	B	A	A	A	A	B	B	A	A	A	A	A	B	B	A	A	A	A	A	H	A	A	B	A	B	B	A	B	B	B	A	A	B	A	A	B	B	A	B	B	A
S3_34601434	3	182.65	A	B	B	A	B	B	B	A	A	A	A	B	B	A	A	A	A	A	B	B	A	A	A	A	A	H	A	A	B	A	B	B	A	B	B	B	A	A	B	A	A	B	B	A	B	B	A
S3_34637613	3	182.69	A	B	B	A	B	B	B	A	A	A	A	B	B	A	A	A	A	A	B	B	A	A	A	A	A	H	A	A	B	A	B	B	A	B	B	B	A	A	B	A	A	B	B	A	B	B	A
S3_34657752	3	182.72	A	B	B	A	B	B	B	A	A	A	A	B	B	A	A	A	A	A	B	B	A	A	A	A	A	H	A	A	B	A	B	B	A	B	B	B	A	A	B	A	A	B	B	N	B	B	A
S3_34657847	3	182.72001	A	B	B	A	B	B	B	A	A	A	A	B	B	A	A	A	A	A	B	B	A	A	A	A	A	H	A	A	B	A	B	B	A	B	B	B	A	A	B	A	A	B	B	A	B	B	A
S3_34779286	3	183.18	A	B	B	A	B	B	B	A	A	A	A	B	B	A	A	A	A	A	B	B	A	A	A	A	A	H	A	A	B	A	B	B	A	B	B	B	A	A	B	A	A	B	B	A	B	B	A
S3_34793557	3	183.31001	A	B	B	H	B	B	B	A	A	A	A	B	B	A	A	A	A	A	B	B	A	A	A	A	A	H	A	A	B	A	B	B	A	B	B	B	A	A	B	A	A	B	B	A	B	B	A
S3_34793568	3	183.31002	A	B	B	A	B	B	B	A	A	A	A	B	B	A	A	A	A	A	B	B	A	A	A	A	A	H	A	A	B	A	B	B	A	B	B	B	A	A	B	A	A	B	B	A	B	B	A
S3_34799269	3	183.37	A	B	B	A	B	B	B	A	A	A	A	B	B	A	A	A	A	A	B	B	A	A	A	A	A	H	A	A	B	A	B	B	A	B	B	B	A	A	B	A	A	B	B	A	B	B	A
S3_34800523	3	183.37002	A	B	B	A	B	B	B	A	A	A	A	B	B	A	A	A	A	A	H	B	A	A	A	A	A	H	A	A	B	A	B	B	A	B	B	B	A	H	B	A	A	B	B	A	B	B	A
S3_34852018	3	183.8	A	B	B	A	B	B	B	A	A	A	A	B	B	A	A	A	A	A	B	B	A	A	A	A	A	A	A	A	B	A	B	B	A	B	B	B	A	A	B	A	A	B	B	A	B	B	A
S3_34860913	3	183.88	A	B	B	A	B	B	B	A	A	A	A	B	B	A	A	A	A	A	B	B	A	A	A	A	A	H	A	A	B	A	B	B	A	B	B	B	A	A	B	A	A	B	B	A	B	B	A
S3_34870865	3	183.97	A	B	B	A	B	B	B	A	A	A	A	B	B	A	A	A	A	A	B	B	A	A	A	A	A	H	A	A	B	A	B	B	A	B	B	B	A	A	B	A	A	B	B	A	B	B	A
S3_34870925	3	183.97001	A	B	B	A	B	B	B	A	A	A	A	B	B	A	A	A	A	A	B	B	A	A	A	A	A	H	A	A	B	A	B	B	A	B	B	B	A	A	B	A	A	B	B	A	B	B	A
S3_34878564	3	184.05	A	B	B	A	B	B	B	A	A	A	A	B	B	A	A	A	A	A	B	B	A	A	A	A	A	H	A	A	B	A	B	B	A	B	B	B	A	A	B	A	A	B	B	A	B	B	A
S3_34884105	3	184.08	A	B	B	A	B	B	B	A	A	A	A	B	B	A	A	A	A	A	B	B	A	A	A	A	A	H	A	A	B	A	B	B	A	B	B	B	A	A	B	A	A	B	B	A	B	B	A
S3_34892201	3	184.17	A	B	B	A	B	B	B	A	A	A	A	B	B	A	A	A	A	A	B	B	A	A	A	A	A	H	A	A	B	A	B	B	A	B	B	B	A	A	B	A	A	B	B	A	B	B	A
S3_34896461	3	184.18	A	B	B	A	B	B	B	A	A	A	A	B	B	A	A	A	A	A	B	B	A	A	A	A	A	H	A	A	B	A	B	B	A	B	B	B	A	A	B	A	A	B	B	A	B	B	A
S3_34896482	3	184.18001	A	B	B	A	B	B	B	A	A	A	A	B	B	A	A	A	A	A	B	B	A	A	A	A	A	H	A	A	B	A	B	B	A	B	B	B	A	A	B	A	A	B	B	A	B	B	A
S3_35150307	3	186.31	A	B	B	A	B	B	B	A	A	A	A	B	B	A	A	A	A	A	B	B	A	A	A	A	A	B	A	A	B	A	B	B	A	B	B	B	A	A	B	A	A	B	B	A	B	B	A
S3_35206318	3	186.61	N	B	N	A	B	B	B	A	A	A	A	N	B	A	A	A	A	A	N	B	A	A	A	A	N	B	A	A	B	A	B	B	A	B	B	B	A	A	B	A	A	B	N	N	N	B	A
S3_35243402	3	186.68	A	B	B	A	B	B	B	A	A	A	A	B	B	A	A	A	A	A	B	B	A	A	A	A	A	B	A	A	B	A	B	B	A	B	B	B	A	A	B	A	A	B	B	A	B	B	A
S3_35252349	3	186.71	A	B	B	A	B	B	B	A	A	A	A	B	B	A	A	A	A	A	B	B	A	A	A	A	A	B	A	A	B	A	B	B	A	B	B	B	A	A	B	A	A	B	B	A	B	B	A
S3_35303413	3	186.9	A	B	B	A	B	B	B	A	A	A	A	B	B	A	A	A	A	A	B	B	A	A	A	A	A	B	A	A	B	A	B	B	A	B	B	B	A	A	B	A	A	B	B	A	B	B	A
S3_35310534	3	186.90001	A	B	B	A	B	B	B	A	A	A	A	B	B	A	A	A	A	A	B	B	A	A	A	A	A	B	A	A	B	A	B	B	A	B	B	B	A	A	B	A	A	B	B	A	B	B	A
S3_35425099	3	187.66	A	B	B	A	B	B	B	A	A	A	A	B	B	A	A	A	A	A	B	A	A	A	A	A	A	B	A	A	B	A	B	B	A	B	B	B	A	A	B	A	A	B	B	A	B	B	A
S3_35428848	3	187.66001	A	B	B	A	B	B	B	A	A	A	A	B	B	A	A	A	A	A	B	A	A	A	A	A	A	B	A	A	B	A	B	B	A	B	B	B	A	A	B	A	A	B	B	A	B	B	A
S3_35428870	3	187.66002	A	B	B	A	B	B	B	A	A	A	A	B	B	A	A	A	A	A	B	A	A	A	A	A	A	B	A	A	B	A	B	B	A	B	B	B	A	A	B	A	A	B	B	A	B	B	A
S3_35430605	3	187.68	A	B	B	A	B	B	B	A	A	A	A	B	B	A	A	A	A	A	B	A	A	A	A	A	A	B	A	A	B	A	B	B	A	B	B	B	A	A	B	A	A	B	B	A	B	B	A
S3_35437192	3	187.69	A	B	B	A	B	B	B	A	A	A	A	B	B	A	A	A	A	A	B	A	A	A	A	A	A	B	A	A	B	A	B	B	A	B	B	B	A	A	B	A	A	B	B	A	B	B	A
S3_35497234	3	187.91	A	B	B	A	B	B	B	A	A	A	A	B	B	A	A	A	A	A	B	A	A	A	A	A	A	B	A	A	B	A	B	B	A	B	B	B	A	A	B	A	A	B	B	A	B	B	A
S3_35557085	3	188.19	A	B	B	A	B	B	B	A	A	A	A	B	B	A	A	A	A	A	B	A	A	A	A	A	A	B	A	A	B	A	B	B	A	B	B	B	A	A	B	A	A	B	B	A	B	B	A
S3_35562471	3	188.19001	A	B	B	A	B	B	B	A	A	A	A	B	B	A	A	A	A	A	B	A	A	A	A	A	A	B	A	A	B	A	B	B	A	B	B	B	A	A	B	A	A	B	B	A	B	B	A
S3_35593310	3	188.31	A	B	B	A	B	B	B	A	A	A	A	B	B	A	A	A	A	A	B	A	A	A	A	A	A	B	A	A	B	A	B	B	A	B	B	B	A	A	B	A	A	B	B	A	B	B	A
S3_35658924	3	188.58	A	B	B	A	B	B	B	A	A	A	A	B	B	A	A	A	A	A	B	A	A	A	A	A	A	B	A	A	B	A	B	B	A	B	B	B	A	A	B	A	A	B	B	A	B	B	A
S3_35692810	3	188.68	A	B	B	A	B	B	B	A	A	A	A	B	B	A	A	A	N	A	B	A	A	A	A	A	A	B	A	A	B	A	B	B	A	B	B	B	A	A	B	A	A	B	B	A	B	B	A
S3_35766999	3	189.05	A	B	B	A	B	B	B	A	A	A	A	B	B	A	A	A	A	A	B	A	A	A	A	A	A	B	A	A	B	A	B	B	A	B	B	B	A	A	B	A	A	B	B	A	B	B	A
S3_36151821	3	193.54	A	B	B	B	B	B	A	A	A	A	A	B	B	A	A	A	A	A	B	B	A	B	A	A	A	B	A	B	B	A	B	A	A	B	B	B	A	B	B	A	A	B	B	A	B	B	A
S3_36188485	3	194.02	A	B	B	B	B	B	A	A	A	A	A	B	B	A	A	A	A	A	B	B	A	B	A	A	A	B	A	B	B	A	B	A	A	B	B	B	A	B	B	A	A	B	B	A	B	B	A
S3_36204136	3	194.13	A	B	B	B	B	B	A	A	A	A	A	B	B	A	A	A	A	A	B	B	A	B	A	A	A	B	A	B	B	A	B	A	A	B	B	B	A	B	B	A	A	B	B	A	B	B	A
S3_36239509	3	194.21	A	B	B	B	B	B	A	A	A	A	A	B	B	A	A	A	A	A	B	B	A	B	A	A	A	B	A	B	B	A	B	A	A	B	B	B	A	B	B	A	A	B	B	A	B	B	A
S3_36240002	3	194.21001	A	N	B	B	B	B	A	A	A	A	A	B	B	A	A	A	A	A	B	B	A	B	A	N	A	B	A	B	H	A	B	A	A	B	B	B	A	B	B	A	N	B	B	A	B	B	A
S3_36261669	3	194.26	A	B	B	B	B	B	A	A	A	A	A	B	B	A	A	A	A	A	B	B	A	B	A	A	A	B	A	B	B	A	B	A	A	B	B	B	A	B	B	A	A	B	B	A	B	B	A
S3_36282260	3	194.28	A	B	B	B	B	B	A	A	A	A	A	B	B	A	A	A	A	A	B	B	A	B	A	A	A	B	A	B	B	A	B	A	A	B	B	B	A	B	B	A	A	B	B	A	B	B	A
S3_36283471	3	194.28001	A	B	B	B	B	B	A	A	A	A	A	B	B	A	A	A	A	A	B	B	A	B	A	A	A	B	A	B	B	A	B	A	A	B	B	B	A	B	B	A	A	B	B	A	B	B	A
S3_36284650	3	194.33	A	N	N	B	B	B	A	A	A	A	A	B	B	A	A	A	A	A	N	B	A	B	A	N	A	N	A	B	B	A	B	A	A	B	B	B	A	B	B	A	A	B	N	N	B	B	A
S3_36293343	3	194.33001	A	B	B	B	B	B	A	A	A	A	A	B	B	A	A	A	A	A	B	B	A	B	A	A	A	B	A	B	B	A	B	A	A	B	B	B	A	B	B	A	A	B	B	A	B	B	A
S3_36360829	3	194.39	A	B	B	B	B	B	A	A	A	A	A	B	B	A	A	A	A	A	B	B	A	B	A	A	A	B	A	B	B	A	B	A	A	B	B	B	A	B	B	A	A	B	B	A	B	B	A
S3_36363485	3	194.39002	N	B	B	B	B	B	A	A	A	A	A	B	B	A	A	N	A	A	B	B	A	B	A	A	A	B	A	B	B	A	B	A	N	B	B	B	A	B	B	A	A	B	B	A	B	B	A
S3_36396457	3	194.5	A	B	B	B	B	B	A	A	A	A	A	B	B	A	A	A	A	A	B	B	A	B	A	A	A	B	A	B	B	A	B	A	A	B	B	B	A	B	B	A	A	B	B	A	B	B	A
S3_36401794	3	194.50001	A	B	B	B	B	B	A	A	A	A	A	B	B	A	A	A	A	A	B	B	A	B	A	A	A	B	A	B	B	A	B	A	A	B	B	B	A	B	B	A	A	B	B	A	B	B	A
S3_36405799	3	194.50002	A	B	B	B	B	B	A	A	A	A	N	N	B	A	A	A	A	A	B	B	A	B	A	A	A	B	A	B	B	A	B	A	A	B	B	B	A	B	B	A	A	B	B	A	B	B	A
S3_36405844	3	194.50003	A	B	B	B	B	B	A	A	A	A	N	N	B	A	A	A	A	A	B	B	A	B	A	A	A	B	A	B	B	A	B	A	A	B	B	B	A	B	B	A	A	B	B	A	B	B	A
S4_411524	4	3.02	B	A	A	A	A	A	A	A	B	B	B	B	B	B	B	B	B	A	A	B	B	A	H	A	B	A	A	A	A	A	H	B	A	B	B	B	A	A	B	B	A	A	A	A	B	B	B
S4_472804	4	3.4	A	A	A	A	A	A	A	A	B	B	B	B	B	B	B	B	B	A	A	B	B	A	H	A	B	A	A	A	A	A	H	B	A	B	B	B	A	A	B	B	A	A	A	A	B	B	B
S4_483338	4	3.40001	A	A	A	A	A	A	A	A	B	B	B	B	B	B	B	B	B	A	A	B	B	A	H	A	B	A	A	A	A	A	H	B	A	B	B	B	A	A	B	B	A	A	A	A	B	B	B
S4_585696	4	3.83	A	A	A	A	A	A	A	A	B	B	B	B	B	B	B	B	B	A	A	B	B	A	H	A	B	A	A	A	A	A	H	B	A	B	B	B	A	A	B	B	A	A	A	A	B	B	B
S4_598877	4	4.12	A	A	A	A	A	A	A	A	B	B	B	B	B	B	B	B	B	A	A	B	B	A	H	A	B	A	A	A	A	A	H	B	A	B	B	B	A	A	B	B	A	A	A	A	B	B	B
S4_906696	4	6.24	A	A	A	A	A	A	B	A	B	B	B	B	B	B	B	B	B	A	H	B	B	A	H	A	B	A	A	A	A	A	A	B	A	B	B	B	A	A	B	B	A	A	A	A	B	B	B
S4_945793	4	6.26	A	A	A	A	A	A	B	A	B	B	B	B	B	B	B	B	B	A	H	B	B	A	H	A	B	A	A	A	A	A	A	B	A	B	B	B	A	A	B	B	A	A	A	A	B	B	B
S4_997559	4	6.29	A	A	A	A	A	A	B	A	B	B	B	B	B	B	B	B	B	A	H	B	B	A	H	A	B	A	A	A	A	A	A	B	A	B	B	B	A	A	B	B	A	A	A	A	B	B	B
S4_1004905	4	6.29001	A	A	A	A	A	A	B	N	B	B	B	B	B	B	B	B	B	A	N	B	B	A	H	A	B	A	N	A	A	A	A	B	A	N	B	B	A	A	B	B	A	A	A	N	B	B	B
S4_1015786	4	6.32	A	A	A	A	A	A	B	A	B	B	B	B	B	B	B	B	B	A	H	B	B	A	H	A	B	A	A	A	A	A	A	B	A	B	B	B	A	A	B	B	A	A	A	A	B	B	B
S4_1024435	4	6.32002	A	A	A	A	A	A	B	A	B	B	B	B	B	B	B	B	B	A	H	B	B	A	H	A	B	A	A	A	A	A	A	B	A	B	B	B	A	A	B	B	A	A	A	A	B	B	B
S4_1025744	4	6.32003	A	A	A	A	A	A	B	A	B	B	B	B	B	B	B	B	B	A	H	B	B	A	H	A	B	A	A	A	A	A	A	B	A	B	B	B	A	A	B	B	A	A	A	A	B	B	B
S4_1025834	4	6.32004	A	A	A	A	A	A	B	A	B	B	B	B	B	B	B	B	B	A	H	B	B	A	H	A	B	A	A	A	A	A	A	B	A	B	B	B	A	A	B	B	A	A	A	A	B	B	B
S4_1114370	4	6.38	A	A	A	A	A	A	B	A	B	B	B	B	B	B	B	B	B	A	H	B	B	A	H	A	B	A	A	A	A	A	A	B	A	B	B	B	A	A	B	B	A	A	A	A	B	B	B
S4_1166475	4	6.41	A	A	A	A	A	A	B	A	B	B	B	B	B	B	B	B	B	A	H	B	B	A	H	A	B	A	A	A	A	A	A	B	A	B	B	B	A	A	B	B	A	A	A	A	B	B	B
S4_1170856	4	6.44	A	A	A	A	A	A	B	A	B	B	B	B	B	B	B	N	N	A	A	B	B	A	H	N	B	A	A	A	A	A	A	N	A	B	B	B	A	A	B	B	A	A	A	A	B	B	B
S4_1201179	4	6.57	A	A	A	A	A	A	B	A	B	B	B	B	B	B	B	B	B	A	H	B	B	A	H	A	B	A	A	A	A	A	A	B	A	B	B	B	A	A	B	B	A	A	A	A	B	B	B
S4_1216012	4	6.65	A	A	A	A	A	A	B	A	B	B	B	B	B	B	B	B	B	A	H	B	B	A	H	A	B	A	A	A	A	A	A	B	A	B	B	B	A	A	B	B	A	A	A	A	B	B	B
S4_1816514	4	9	A	A	A	B	A	A	B	A	B	B	B	B	B	B	B	B	B	A	H	B	B	A	H	A	B	A	A	A	A	A	A	B	A	B	B	B	A	A	B	B	A	A	A	A	B	B	B
S4_1848850	4	9.91	A	A	A	B	A	A	B	A	B	B	B	B	B	B	B	B	B	A	H	B	B	A	H	A	B	A	A	A	A	A	A	B	A	B	B	B	A	A	B	B	A	A	A	A	B	B	B
S4_1858311	4	10.01	A	A	A	B	A	A	B	A	B	B	B	B	B	B	B	B	B	A	H	B	B	A	H	A	B	A	A	A	A	A	A	B	A	B	B	B	A	A	B	B	A	A	A	A	B	B	B
S4_1872841	4	10.01001	N	A	A	B	A	N	B	A	B	B	B	B	N	B	B	B	B	A	N	B	B	A	H	A	B	A	A	A	A	A	A	B	A	B	B	B	A	A	B	B	N	A	A	A	B	B	B
S4_4170313	4	15.08	A	A	A	B	A	A	B	A	N	B	B	B	N	A	A	A	B	A	H	B	A	A	H	A	B	A	A	A	A	A	B	B	A	B	B	B	A	A	B	B	A	A	N	A	B	B	B
S4_4178666	4	15.08002	A	A	A	B	A	A	B	A	B	B	B	B	B	A	A	A	B	A	H	B	A	A	H	A	B	A	A	A	A	A	B	B	A	B	B	B	A	A	B	B	A	A	A	A	B	B	B
S4_4413550	4	15.21	A	N	N	B	A	A	B	A	B	B	B	B	B	A	A	A	B	A	A	A	A	A	H	A	B	A	A	A	A	A	B	B	A	B	B	B	A	A	B	B	A	A	A	A	B	B	B
S4_4470785	4	15.27	A	A	A	B	A	A	B	A	B	B	B	B	B	N	A	A	B	A	A	A	A	A	H	A	B	A	N	A	A	N	B	B	A	B	B	B	A	A	B	B	A	A	A	A	B	B	B
S4_4499277	4	15.41	A	A	A	B	A	A	B	A	A	B	B	B	B	A	A	A	B	A	H	A	A	A	H	A	B	A	A	A	A	A	B	B	A	B	B	B	A	A	B	B	A	A	A	A	B	B	B
S4_4499444	4	15.41001	A	A	A	B	A	A	B	N	N	B	B	B	B	A	A	A	B	A	H	A	A	A	H	A	B	A	A	A	A	A	B	B	A	B	B	B	A	A	B	B	A	A	A	A	B	B	B
S4_4558375	4	15.68	A	A	A	B	A	A	B	A	A	B	B	B	B	A	A	A	B	A	B	A	A	A	H	A	B	N	A	A	A	A	B	B	N	B	B	B	A	A	B	B	A	A	A	A	B	B	B
S4_4558447	4	15.68001	A	A	A	B	A	A	B	A	A	B	B	B	B	A	A	A	B	A	B	A	A	A	H	A	B	A	A	A	A	A	B	B	A	B	B	B	A	A	B	B	A	A	A	A	B	B	B
S4_4569308	4	16.41	A	A	A	B	A	A	B	A	A	B	B	B	B	A	A	A	B	A	H	A	A	A	H	A	B	A	A	A	A	A	B	B	A	B	B	B	A	A	B	B	A	A	A	A	B	B	B
S4_4598417	4	16.41001	A	A	A	B	A	A	B	A	A	B	B	B	B	A	A	A	B	A	H	A	A	A	H	A	B	A	A	A	A	A	B	B	A	B	B	B	A	A	B	B	A	A	A	A	B	B	B
S4_4671347	4	16.45	N	A	N	B	A	A	B	A	A	B	B	B	B	A	A	A	B	A	H	A	A	A	H	A	B	A	A	A	A	A	B	B	A	B	B	B	A	A	B	B	A	A	A	A	B	B	B
S4_4732379	4	16.47	A	A	A	B	A	A	B	A	A	B	B	B	B	A	A	A	B	A	H	A	A	A	H	A	B	A	A	A	A	A	B	B	A	B	B	B	A	A	B	B	A	A	A	A	B	B	B
S4_4740564	4	16.48	A	A	A	H	A	A	B	A	N	B	N	B	B	A	A	A	B	A	A	A	A	A	A	A	B	A	A	A	A	A	B	B	N	B	B	B	A	A	B	B	A	A	A	A	B	B	B
S4_4764805	4	16.48001	A	A	A	B	A	A	B	A	A	B	B	B	B	A	A	A	B	A	H	A	A	A	H	A	B	A	A	A	A	A	B	B	A	B	B	B	A	A	B	B	A	A	A	A	B	B	B
S4_4941696	4	16.57	A	A	A	B	A	A	B	A	A	B	B	B	B	A	A	A	B	A	H	A	A	A	H	A	B	A	A	A	A	A	B	B	A	B	B	B	A	A	B	B	A	A	A	A	B	B	B
S4_5107668	4	16.64	A	A	A	B	A	A	N	A	A	B	B	B	B	A	A	A	B	A	H	A	A	A	H	A	B	A	A	A	A	A	B	B	A	B	B	B	A	A	B	B	A	A	A	A	B	B	B
S4_5135455	4	16.65	A	A	A	B	A	A	B	A	A	B	B	B	B	A	A	A	B	A	H	A	A	A	H	A	B	A	A	A	A	A	B	B	A	B	B	B	A	A	B	B	A	A	A	A	B	B	B
S4_5788084	4	17.76	A	A	A	B	A	A	B	A	B	B	B	B	B	A	A	A	B	A	A	A	A	A	H	A	B	A	A	A	A	A	A	A	A	B	B	B	B	A	B	B	A	A	A	A	B	A	B
S4_5806676	4	17.8	A	A	A	B	A	A	B	A	B	B	B	B	B	A	A	A	B	A	A	A	A	A	H	A	B	A	A	A	A	A	A	A	A	B	B	B	B	A	B	B	A	A	A	A	B	A	B
S4_5867219	4	18.02	A	A	A	B	A	A	B	A	B	B	B	B	B	A	A	A	B	A	A	A	A	A	H	A	B	A	A	A	A	A	A	A	A	B	B	B	B	A	B	B	A	A	A	A	B	A	B
S4_5867260	4	18.02001	A	A	A	B	A	A	B	A	B	B	B	B	B	A	A	A	B	A	A	A	A	A	H	A	B	A	A	A	A	A	A	A	A	B	B	B	B	A	B	B	A	A	A	A	B	A	B
S4_6258104	4	18.74	A	A	A	B	A	A	B	A	B	B	B	B	B	A	A	A	B	A	A	A	A	A	H	A	B	A	A	A	A	A	A	A	A	B	B	B	B	A	B	B	A	A	A	A	B	A	B
S4_6258107	4	18.74001	A	A	A	B	A	A	B	A	B	B	B	B	B	A	A	A	B	A	A	A	A	A	H	A	B	A	A	A	A	A	A	A	A	B	B	B	B	A	B	B	A	A	A	A	B	A	B
S4_6261764	4	18.74002	A	A	A	B	A	A	B	A	B	B	B	B	B	A	A	A	B	A	A	A	A	A	H	A	B	A	A	A	A	A	A	A	A	B	B	B	B	A	B	B	A	A	A	A	B	A	B
S4_6261796	4	18.74003	A	A	A	B	A	A	B	A	B	B	B	B	B	A	A	A	B	A	A	A	A	A	H	A	B	A	A	A	A	A	A	A	A	B	B	B	B	A	B	B	A	A	A	A	B	A	B
S4_6473022	4	18.87	A	A	A	B	A	A	B	A	B	B	B	B	B	A	A	A	B	A	A	A	A	A	H	A	B	A	A	A	A	A	A	A	A	B	B	B	B	A	B	B	A	A	A	A	B	A	B
S4_6499467	4	18.89	A	A	A	B	A	A	B	A	B	B	B	B	B	A	N	A	B	A	A	A	A	A	H	A	B	A	A	A	A	A	A	A	A	B	B	B	B	A	B	B	A	A	A	A	B	A	B
S4_6518517	4	19.1	A	A	A	B	A	A	B	A	B	B	B	B	B	A	A	A	B	A	A	A	A	A	H	A	B	A	A	A	A	A	A	A	A	B	B	B	B	A	B	B	A	A	A	A	B	A	B
S4_12592012	4	20	N	A	A	B	A	A	B	A	B	B	B	B	B	A	A	A	A	A	A	A	A	A	A	A	B	A	A	A	A	A	A	A	A	B	B	B	B	A	B	B	A	A	A	A	B	A	A
S4_12965513	4	20.13	A	A	A	B	A	H	B	A	B	B	A	B	A	A	A	A	A	A	A	A	A	A	H	A	B	A	A	A	A	A	A	A	A	B	B	B	B	A	B	B	A	A	A	A	B	A	A
S4_12988692	4	20.13001	A	A	A	B	A	H	B	A	B	B	A	B	A	A	A	A	A	A	A	A	A	A	H	A	B	A	A	A	A	A	A	A	A	B	B	B	B	A	B	B	A	A	A	A	B	A	A
S4_12988716	4	20.13002	A	A	A	B	A	H	B	A	B	B	A	B	A	A	A	A	A	A	A	A	A	A	H	A	B	A	A	A	A	A	A	A	A	B	B	B	B	A	B	B	A	A	A	A	B	A	A
S4_12988722	4	20.13003	A	A	A	B	A	H	B	A	B	B	A	B	A	A	A	A	A	A	A	A	A	A	H	A	B	A	A	A	A	A	A	A	A	B	B	B	B	A	B	B	A	A	A	A	B	A	A
S4_13000541	4	20.15	A	A	A	B	A	H	B	A	B	B	A	B	A	A	A	A	A	A	A	A	A	A	H	A	B	A	A	A	A	A	A	A	A	B	B	B	B	A	B	B	A	A	A	A	B	A	A
S4_13001777	4	20.15001	A	A	A	B	A	H	B	A	B	B	A	B	A	A	A	A	A	A	A	A	A	A	H	A	B	A	A	A	A	A	A	A	A	B	B	B	B	A	B	B	A	A	A	A	B	A	A
S4_13001807	4	20.15002	A	A	A	B	A	H	B	A	B	B	A	B	A	A	A	A	A	A	A	A	A	A	N	A	B	A	A	A	A	A	A	A	A	B	B	B	B	A	B	B	A	A	A	A	B	A	A
S4_13158659	4	20.2	A	A	A	B	A	H	B	A	B	B	A	B	A	A	A	A	A	A	A	A	A	A	H	A	B	A	A	A	A	A	A	A	A	B	B	B	B	A	B	B	A	A	A	A	B	A	A
S4_13346350	4	20.27	A	A	A	B	A	H	B	A	B	B	A	B	A	A	A	A	A	A	A	A	A	A	B	A	B	A	A	A	A	A	A	A	A	B	B	B	B	A	B	B	A	A	A	A	B	A	A
S4_13513957	4	21.71	A	A	A	B	A	H	B	A	B	B	A	B	A	A	A	A	A	A	A	A	A	A	B	A	B	A	A	A	A	A	A	A	A	B	B	B	B	A	B	B	A	A	A	A	B	A	A
S4_13513965	4	21.71001	A	A	A	B	A	H	B	A	B	B	A	B	A	A	A	A	A	A	A	A	A	A	B	A	B	A	A	A	A	A	A	A	A	B	B	B	B	A	B	B	A	A	A	A	B	A	A
S4_13514063	4	21.71002	A	A	A	B	A	H	B	A	B	B	A	B	A	A	A	A	A	A	A	A	A	A	B	A	B	A	A	A	A	A	A	A	A	B	B	B	B	A	B	B	A	A	A	A	B	A	A
S4_13523807	4	21.73	A	A	A	B	A	H	B	A	B	B	A	B	A	A	A	A	A	A	A	A	A	A	B	A	B	A	A	A	A	A	A	A	A	B	B	B	B	A	B	B	A	A	A	A	B	A	A
S4_13583372	4	21.95	A	A	A	B	A	H	B	A	B	B	A	B	A	A	A	A	A	A	A	A	A	A	B	A	B	A	A	A	A	A	A	A	A	B	B	B	B	A	B	B	A	A	A	A	B	A	A
S4_13706563	4	21.96	H	A	A	B	A	A	N	A	B	B	A	B	N	A	A	A	A	A	A	A	A	A	B	A	B	A	N	A	A	A	A	A	A	B	B	N	B	A	N	B	A	A	A	A	B	A	N
S4_13803235	4	21.97	A	A	A	B	A	H	B	A	B	B	A	B	A	A	A	A	A	A	A	A	A	A	B	A	B	A	A	A	A	A	A	A	A	B	B	B	B	A	B	B	A	A	A	A	B	A	A
S4_13820209	4	21.98	A	A	N	B	A	H	B	A	B	B	A	B	A	A	A	A	A	A	A	A	A	A	B	A	N	A	A	A	A	A	A	A	A	B	B	B	B	A	B	B	H	A	A	A	B	A	N
S4_13820225	4	21.98001	A	A	A	B	A	H	B	A	B	B	A	B	A	A	A	A	A	A	A	A	A	A	B	A	B	A	A	A	A	A	A	A	A	B	B	B	B	A	B	B	A	A	A	A	B	A	A
S4_13820294	4	21.98002	A	A	A	B	A	A	B	A	B	B	A	B	A	A	A	A	A	A	A	A	A	A	B	A	B	A	A	A	A	A	A	A	A	B	B	B	B	A	B	B	A	A	A	A	B	A	A
S4_13863476	4	21.98003	A	A	A	B	A	H	B	A	B	B	A	B	A	A	A	A	A	A	A	A	A	A	B	A	B	A	A	A	A	A	A	A	A	B	B	B	B	A	B	B	A	A	A	A	B	A	A
S4_13888907	4	21.98004	A	A	A	B	A	H	B	A	B	B	A	B	A	A	A	A	A	A	A	A	A	A	B	A	B	A	A	A	A	A	A	A	A	B	B	B	B	A	B	B	A	A	A	A	B	A	A
S4_13888911	4	21.98005	A	A	A	B	A	H	B	A	B	B	A	B	A	A	A	A	A	A	A	A	A	A	B	A	B	A	A	A	A	A	A	A	A	B	B	B	B	A	B	B	A	A	A	A	B	A	A
S4_14047567	4	22	A	A	A	B	A	A	B	A	B	B	A	B	A	A	A	A	A	A	A	A	A	A	B	A	B	A	A	A	A	A	A	A	A	B	B	B	B	A	B	B	A	A	A	A	B	A	A
S4_14051588	4	22.00001	A	A	A	B	A	H	B	A	B	B	A	B	A	A	A	A	A	A	A	A	A	A	B	A	B	A	A	A	A	A	A	A	A	B	B	B	B	A	B	B	A	A	A	A	B	A	A
S4_14051589	4	22.00002	A	A	A	B	A	H	B	A	B	B	A	B	A	A	A	A	A	A	A	A	A	A	B	A	B	A	A	A	A	A	A	A	A	B	B	B	B	A	B	B	A	A	A	A	B	A	A
S4_14056754	4	22.00003	A	A	A	B	A	H	B	A	B	B	A	B	A	A	A	A	A	A	A	A	A	A	B	A	B	A	A	A	A	A	A	A	A	B	B	B	B	A	B	B	A	A	A	A	B	A	A
S4_14058028	4	22.00004	A	A	A	B	A	H	B	A	B	B	A	B	A	A	A	A	A	A	A	A	A	A	B	A	B	A	A	A	A	A	A	A	A	B	B	B	B	A	B	B	A	A	A	A	B	A	A
S4_14058042	4	22.00005	A	A	A	B	A	H	B	A	B	B	A	B	A	A	A	A	A	A	A	A	A	A	B	A	B	A	A	A	A	A	A	A	A	B	B	B	B	A	B	B	A	A	A	A	B	A	A
S4_14156048	4	22.01	A	A	A	B	A	H	B	A	B	B	A	B	A	A	A	A	A	A	A	A	A	A	B	A	B	A	A	A	A	A	A	A	A	B	B	B	B	A	B	B	A	A	A	A	B	A	A
S4_14182004	4	22.02	A	A	A	H	A	H	B	A	B	B	A	B	A	A	A	A	A	A	A	A	A	A	B	A	B	A	A	A	A	A	A	A	A	B	B	B	B	A	B	B	A	A	A	A	B	A	A
S4_14183398	4	22.02001	A	A	A	B	A	B	B	A	B	B	A	B	A	A	A	A	A	A	A	A	A	A	B	A	B	A	A	A	A	A	A	A	A	B	B	B	B	A	B	B	A	A	A	A	B	A	A
S4_14376965	4	22.02002	A	A	A	B	A	H	B	A	B	B	A	B	A	A	A	A	A	A	A	A	A	A	B	A	B	A	A	A	A	A	A	A	A	B	B	B	B	A	B	B	A	A	A	A	B	A	A
S4_14376967	4	22.02003	A	A	A	B	A	H	B	A	B	B	A	B	A	A	A	A	A	A	A	A	A	A	B	A	B	A	A	A	A	A	A	A	A	B	B	B	B	A	B	B	A	A	A	A	B	A	A
S4_17608951	4	30.54	B	H	A	B	A	A	B	A	B	B	B	B	A	B	B	A	B	A	B	B	A	A	B	A	B	A	A	B	A	B	B	A	A	A	B	B	B	A	A	B	B	A	A	A	B	A	B
S4_17630231	4	30.76	B	A	A	B	A	A	B	A	B	B	B	B	H	B	B	A	B	A	B	B	A	A	B	A	B	A	A	B	A	B	B	A	A	A	B	B	B	A	A	B	B	A	A	A	B	A	B
S4_17642027	4	30.76001	B	A	A	B	A	A	B	A	B	B	B	B	A	B	B	A	B	A	B	B	A	A	B	A	B	A	A	B	A	B	B	A	A	A	B	N	B	A	A	B	B	A	A	A	B	A	B
S4_17642076	4	30.76002	B	A	A	B	A	A	B	A	B	B	B	B	A	B	B	A	B	A	H	B	A	A	B	A	B	A	A	B	A	B	B	A	A	A	B	B	B	A	A	B	B	A	A	A	B	A	B
S4_17913607	4	30.89	B	A	A	B	A	A	B	A	B	B	B	B	A	B	B	A	B	A	B	B	A	A	B	A	B	A	A	B	A	B	B	A	A	A	B	B	B	A	A	B	B	A	A	A	B	A	B
S4_17913615	4	30.89001	B	A	A	B	A	A	B	A	B	B	B	B	A	B	B	A	B	A	B	B	A	A	B	A	B	A	A	B	A	B	B	A	A	A	B	B	B	A	A	B	B	A	A	A	B	A	B
S4_17913703	4	30.89002	B	A	A	B	A	A	B	A	B	B	B	B	A	B	B	A	B	A	B	B	A	A	B	A	B	A	A	B	A	B	B	A	A	A	B	B	B	A	A	B	B	A	A	A	B	A	B
S4_17913705	4	30.89003	B	A	A	B	A	A	B	A	B	B	B	B	A	B	B	A	B	A	B	B	A	A	B	A	B	A	A	B	A	B	B	A	A	A	B	B	B	A	A	B	B	A	A	A	B	A	B
S4_18057421	4	30.97	B	A	A	B	A	A	B	A	A	B	B	B	A	B	B	A	B	B	B	B	A	A	B	A	B	A	A	B	A	B	B	A	A	A	B	B	B	A	A	B	B	A	A	A	B	A	B
S4_18057540	4	30.97001	B	A	A	B	A	A	B	A	A	B	B	B	N	B	B	A	B	B	B	B	A	A	B	A	B	A	A	B	A	B	B	A	A	A	B	B	B	A	A	B	B	A	N	A	B	A	B
S4_18064701	4	30.97002	B	A	N	B	A	A	B	A	A	B	N	B	A	B	B	A	B	B	B	B	A	A	B	A	B	A	A	B	A	B	B	A	A	A	B	B	B	A	A	B	B	A	A	A	B	A	B
S4_18171163	4	31.04	B	A	A	B	A	A	B	A	A	B	B	B	A	B	B	A	B	B	B	B	A	A	B	A	B	A	A	B	A	B	B	A	A	A	B	B	B	A	A	B	B	A	A	A	B	A	B
S4_18201322	4	31.05	B	A	A	B	A	A	B	A	A	B	B	B	A	B	B	A	B	B	B	B	A	A	B	A	B	A	A	B	A	B	B	A	A	A	B	B	B	A	A	B	B	A	A	A	B	A	B
S4_18212352	4	31.06	B	A	A	B	A	A	B	A	A	B	B	B	A	B	B	A	B	B	B	B	A	A	B	A	B	A	A	B	A	B	B	A	A	A	B	B	B	A	A	B	B	A	A	A	B	A	B
S4_18213199	4	31.06001	B	A	A	B	A	A	B	A	A	B	B	B	A	B	B	A	B	B	B	B	A	A	B	A	B	A	A	B	A	B	B	A	A	A	B	B	B	A	A	B	B	A	A	A	B	A	B
S4_18258378	4	31.36	B	A	A	B	A	A	B	A	A	B	B	B	A	B	B	A	B	B	B	B	A	A	B	A	B	A	A	B	A	B	B	A	A	A	B	B	B	A	A	B	B	A	A	A	B	A	B
S4_18375375	4	31.53	B	A	A	B	A	A	B	A	A	B	B	B	A	B	B	A	B	B	B	B	A	A	B	A	B	A	A	B	A	B	B	A	A	A	B	B	B	A	A	B	B	A	A	A	B	A	B
S4_18379496	4	31.54	B	A	A	B	A	A	B	A	A	B	B	B	A	B	B	A	B	B	B	B	A	A	B	A	B	A	A	B	A	B	B	A	A	A	B	B	B	A	A	B	B	A	A	A	B	A	B
S4_18379512	4	31.54001	B	A	A	B	A	A	B	A	A	B	B	B	A	B	B	A	B	B	B	B	A	A	B	A	B	A	A	B	A	B	B	A	A	A	B	B	B	A	A	B	B	A	A	A	B	A	B
S4_18379884	4	31.54003	B	A	A	B	A	A	B	A	A	B	B	B	A	B	B	A	B	B	B	B	A	A	B	A	B	A	A	B	A	B	B	A	A	A	B	B	B	A	A	B	B	A	A	A	B	A	B
S4_18397058	4	31.56	B	A	A	B	A	A	B	A	A	B	B	B	A	B	B	A	B	B	B	B	A	A	B	A	B	A	A	B	A	B	B	A	A	A	B	B	B	A	A	B	B	A	A	A	B	A	B
S4_18397094	4	31.56001	B	A	A	B	A	A	B	A	A	B	B	B	A	B	B	A	B	B	B	B	A	A	B	A	B	A	A	B	A	B	B	A	A	A	B	B	B	A	A	B	B	A	A	A	B	A	B
S4_18420565	4	31.59	B	A	A	B	A	A	B	A	A	B	B	N	A	B	B	A	B	B	N	B	A	A	B	A	B	A	A	B	A	B	N	A	A	A	B	B	B	A	A	B	B	A	A	A	B	A	B
S4_18427292	4	31.6	B	A	A	B	A	A	B	A	A	B	B	B	A	B	B	A	B	B	B	B	A	A	B	A	B	A	A	B	A	B	B	A	A	A	B	B	B	A	A	B	B	A	A	A	B	A	B
S4_18427303	4	31.60001	B	A	A	B	A	A	B	A	A	B	B	B	A	B	B	A	B	B	B	B	A	A	B	A	B	A	A	B	A	B	B	A	A	A	B	B	B	A	A	B	B	A	A	A	B	A	B
S4_18427333	4	31.60002	B	A	A	B	A	A	B	A	A	B	B	B	A	B	B	A	B	B	B	B	A	A	B	A	B	A	A	B	A	B	B	A	A	A	B	B	B	A	A	B	B	A	A	A	B	A	B
S4_18427337	4	31.60003	B	A	A	B	A	A	B	A	A	B	B	B	A	B	B	A	B	B	B	B	A	A	B	A	B	A	A	B	A	B	B	A	A	A	B	B	B	A	A	B	B	A	A	A	B	A	B
S4_18537160	4	31.76	B	A	A	B	A	A	B	A	A	B	B	B	A	B	B	A	B	B	B	B	A	A	B	A	B	A	A	B	A	B	B	A	A	A	B	B	B	A	A	B	B	A	A	A	B	A	B
S4_18537173	4	31.76001	B	A	A	B	A	A	B	A	A	B	B	B	A	B	B	A	B	B	B	B	A	A	B	A	B	A	A	B	A	B	B	A	A	A	B	B	B	A	A	B	B	A	A	A	B	A	B
S4_18601012	4	31.85	B	A	A	B	A	A	B	A	A	B	B	B	A	B	B	A	B	B	B	B	A	A	B	A	B	A	A	B	A	B	B	A	A	A	B	B	B	A	A	B	B	A	A	A	B	A	B
S4_18676801	4	31.95	B	A	A	B	A	A	B	A	A	B	B	B	A	B	B	A	B	B	B	B	A	A	B	A	B	A	A	B	A	B	B	A	A	A	B	B	B	A	A	B	B	A	A	A	B	A	B
S4_18761371	4	32.07	B	A	A	B	A	A	B	A	A	B	B	B	A	B	B	A	B	B	B	B	A	A	B	A	B	A	A	B	A	B	B	A	A	A	B	B	B	A	A	B	B	A	A	A	B	A	B
S4_18763820	4	32.07001	B	A	A	B	A	A	B	A	A	B	B	B	A	B	N	A	B	B	B	B	A	A	B	A	B	A	A	B	A	B	B	A	A	A	B	B	B	A	A	B	B	A	A	A	B	A	B
S4_18772649	4	32.1	B	A	A	B	A	A	B	A	A	B	B	B	A	B	B	A	B	B	B	B	A	A	B	A	B	A	A	B	A	B	B	A	A	A	B	B	B	A	A	B	B	A	A	A	B	A	B
S4_18950189	4	33.97	B	A	A	B	A	A	B	A	A	B	B	B	A	N	B	A	B	B	B	B	A	A	B	A	B	A	A	N	A	B	B	A	A	A	N	B	B	A	A	B	B	A	A	A	B	A	N
S4_18956819	4	34.07	B	A	A	B	A	A	B	A	A	B	B	B	A	H	B	A	B	B	B	B	A	A	B	A	B	A	A	B	A	B	B	A	A	A	B	B	B	A	A	B	B	A	A	A	B	A	B
S4_18958363	4	34.07001	B	A	A	B	A	A	B	A	A	B	B	B	A	B	B	A	B	B	B	B	A	A	B	A	B	A	A	B	A	B	B	A	A	A	B	B	B	A	A	B	B	A	A	A	B	A	B
S4_19143301	4	36.27	B	A	A	B	A	A	B	B	A	B	B	B	A	B	B	A	B	B	B	B	A	A	B	A	B	A	A	B	A	B	B	A	A	A	B	B	B	B	A	B	B	A	A	A	B	A	B
S4_19858548	4	40.78	B	A	A	A	A	A	B	B	A	B	B	B	A	B	B	A	B	A	B	B	A	B	B	A	H	B	A	A	B	B	B	B	A	B	B	B	A	B	B	A	B	A	A	A	B	A	B
S4_21200654	4	50.86	B	A	A	A	A	A	B	B	A	B	B	H	B	A	A	A	B	B	B	B	A	B	B	A	B	B	A	N	B	B	B	B	A	B	A	B	A	B	A	A	B	A	A	A	B	A	B
S4_21200692	4	50.86001	B	A	A	A	A	A	B	B	A	B	B	H	B	A	A	A	B	B	B	B	A	B	B	A	B	B	A	N	B	B	B	B	A	B	A	B	A	B	A	A	B	A	A	A	B	A	B
S4_21293140	4	51.09	B	A	A	A	A	A	B	B	A	B	B	H	H	A	A	A	B	B	B	B	A	B	B	A	B	B	A	A	B	B	B	B	A	B	A	B	A	B	A	A	B	A	A	A	B	A	B
S4_21293190	4	51.09001	B	A	A	A	A	A	B	B	A	B	B	H	H	A	A	A	B	B	B	B	A	B	B	A	B	B	A	A	B	B	B	B	A	B	A	B	A	B	A	A	B	A	A	A	B	A	B
S4_21322861	4	51.16	B	A	A	A	A	A	B	B	A	B	B	H	H	A	A	A	B	B	B	B	B	B	B	A	B	B	A	A	B	B	B	B	A	B	A	B	A	B	A	A	B	A	A	A	B	A	B
S4_21345058	4	51.34	B	A	A	A	A	A	B	B	A	B	B	H	H	A	A	A	B	B	B	B	B	B	B	A	B	B	A	A	B	B	B	B	A	B	A	B	A	B	A	A	B	A	A	A	B	A	B
S4_21373339	4	51.34001	B	A	A	A	A	A	B	B	A	B	B	H	H	A	A	A	B	B	B	B	B	B	B	A	B	B	A	A	B	B	B	B	A	B	A	B	A	B	A	A	B	A	A	A	B	A	B
S4_21408934	4	51.34002	B	A	A	A	A	A	B	B	A	B	B	H	H	A	A	A	B	B	B	B	B	B	B	A	B	B	A	A	B	B	B	B	A	B	A	B	A	B	A	A	B	A	A	A	B	A	B
S4_21409582	4	51.34003	B	A	A	A	A	A	B	B	A	B	B	H	H	A	A	A	B	B	B	B	B	B	B	A	B	B	A	A	B	B	B	B	A	B	A	B	A	B	A	A	B	A	A	A	B	A	B
S4_21631772	4	53.43	B	A	A	A	A	A	B	B	A	B	B	H	H	A	A	A	B	B	B	B	B	B	B	A	B	B	A	A	B	B	B	B	A	B	A	B	A	B	A	A	B	A	A	A	B	A	B
S4_21688797	4	53.7	B	A	A	A	A	A	B	B	A	B	B	H	H	A	A	A	B	B	B	B	B	B	B	A	B	B	A	A	B	B	B	B	A	B	A	B	A	B	A	A	B	A	A	A	B	A	B
S4_21690049	4	53.70001	B	A	A	A	A	A	B	B	A	B	B	H	H	A	A	A	B	B	B	B	B	B	B	A	B	B	A	A	B	B	B	B	A	B	A	B	A	B	A	A	B	A	A	A	B	A	B
S4_21706486	4	54.23	B	A	A	A	A	A	B	B	A	B	B	H	H	A	A	A	B	B	B	B	B	B	B	A	B	B	A	A	B	B	B	B	A	B	A	B	A	B	A	A	B	A	A	A	B	A	B
S4_21746628	4	54.23001	B	A	A	A	A	A	B	B	A	B	B	H	H	A	A	A	B	B	B	B	B	B	B	A	B	B	A	A	B	B	B	B	A	B	A	B	A	B	A	A	B	A	A	A	B	A	B
S4_21796004	4	56.6	B	A	A	A	A	A	B	B	A	B	B	H	H	A	A	A	B	B	B	B	B	B	B	A	B	B	A	A	B	B	B	B	A	B	A	B	A	B	A	A	B	A	A	A	B	A	B
S4_21832119	4	56.60001	B	A	A	A	A	A	B	B	A	B	B	H	H	A	A	A	B	B	B	B	B	B	B	A	B	B	A	A	B	B	B	B	A	B	A	B	A	B	A	A	B	A	A	A	B	A	B
S4_21844394	4	56.60002	B	A	A	A	A	A	B	B	A	B	B	H	H	A	A	A	B	B	B	B	B	B	B	A	B	B	A	A	B	B	B	B	A	B	A	B	A	B	A	A	B	A	A	A	B	A	B
S4_21892817	4	57.02	B	A	A	A	A	A	B	B	A	B	B	H	H	A	A	A	B	B	B	B	B	B	B	A	B	B	A	A	B	B	B	B	A	B	A	B	A	B	A	A	B	A	B	A	B	A	B
S4_21960183	4	57.69	B	A	A	A	B	A	B	B	A	B	B	H	H	A	A	A	B	B	B	B	B	B	B	A	B	B	A	A	B	B	B	B	A	B	A	B	A	B	A	A	B	A	B	A	B	A	B
S4_21960184	4	57.69001	B	A	A	A	B	A	B	B	A	B	B	H	H	A	A	A	B	B	B	B	B	B	B	A	B	B	A	A	B	B	B	B	A	B	A	B	A	B	A	A	B	A	B	A	B	A	B
S4_21960185	4	57.69002	B	A	A	A	B	A	B	B	A	B	B	H	H	A	A	A	B	B	B	B	B	B	B	A	B	B	A	A	B	B	B	B	A	B	A	B	A	B	A	A	B	A	B	A	B	A	B
S4_21965292	4	57.73	B	A	A	A	B	A	B	B	A	B	B	H	H	A	A	A	B	B	B	B	B	B	B	A	B	B	A	A	B	B	B	B	A	B	A	B	A	B	A	A	B	A	B	A	B	A	B
S4_21965293	4	57.73001	B	A	A	A	B	A	B	B	A	B	B	H	H	A	A	A	B	B	B	B	B	B	B	A	B	B	A	A	B	B	B	B	A	B	A	B	A	B	A	A	B	A	B	A	B	A	B
S4_21965294	4	57.73002	B	A	A	A	B	A	B	B	A	B	B	H	H	A	A	A	B	B	B	B	B	B	B	A	B	B	A	A	B	B	B	B	A	B	A	B	A	B	A	A	B	A	B	A	B	A	B
S4_21989950	4	57.79	B	A	A	A	B	A	B	B	A	B	B	H	A	A	A	A	B	B	B	B	B	B	B	A	B	B	A	A	B	B	B	B	A	B	A	B	A	B	A	A	B	A	B	A	B	A	B
S4_21989968	4	57.79001	B	A	A	A	B	A	B	B	A	B	B	H	A	A	A	A	B	B	B	B	B	B	B	A	B	B	A	A	B	B	B	B	A	B	A	B	A	B	A	A	B	A	B	A	B	A	B
S4_22176511	4	60.91	B	A	A	A	B	A	B	B	A	B	B	H	H	A	A	A	B	B	B	B	B	B	B	A	B	B	A	A	B	B	B	B	A	B	A	B	A	B	A	A	B	A	B	A	B	A	B
S4_22176514	4	60.91001	B	A	A	A	B	A	B	B	A	B	B	H	H	A	A	A	B	B	B	B	B	B	B	A	B	B	A	A	B	B	B	B	A	B	A	B	A	B	A	A	B	A	B	A	B	A	B
S4_23193239	4	67.67	B	A	A	A	B	A	B	B	A	B	B	A	H	A	A	A	B	B	B	B	B	B	B	A	B	B	A	A	B	B	B	B	A	B	A	B	A	B	A	A	B	B	B	B	B	A	B
S4_23194872	4	67.67001	B	A	A	A	B	A	B	B	A	B	B	A	H	A	A	A	B	B	B	B	B	B	B	A	B	B	A	A	B	B	B	B	A	B	A	B	A	B	A	A	B	B	B	B	B	A	B
S4_23194876	4	67.67002	B	A	A	A	B	A	B	B	A	B	B	A	H	A	A	A	B	B	B	B	B	B	B	A	B	B	A	A	B	B	B	B	A	B	A	B	A	B	A	A	B	B	B	B	B	A	B
S4_23278372	4	68.01	B	A	A	A	B	A	B	B	A	B	B	A	H	A	A	A	B	B	B	B	B	B	B	A	B	B	A	A	B	B	B	B	A	B	A	B	A	B	A	A	B	B	B	B	B	A	B
S4_23418604	4	70.11	B	A	A	A	B	A	B	B	A	B	B	A	H	A	A	A	A	B	B	B	B	B	B	A	B	B	A	A	B	B	B	B	A	B	B	B	A	B	H	A	B	B	B	B	B	A	B
S4_23424327	4	70.11001	B	A	A	A	B	A	B	B	A	B	B	A	B	A	A	A	N	B	B	B	B	B	B	A	B	B	A	A	B	B	B	B	A	B	B	B	A	B	A	A	B	B	B	B	B	A	B
S4_23471035	4	70.11002	N	A	A	A	B	A	B	B	A	B	B	A	B	A	A	A	A	B	B	B	N	B	B	A	B	B	A	N	B	N	B	B	A	N	B	B	A	B	A	A	B	B	B	B	B	A	B
S4_23508984	4	71.73	B	A	A	A	B	A	B	B	A	B	B	A	H	A	A	A	A	B	B	B	B	B	B	A	B	B	A	A	B	B	B	B	A	B	B	B	A	B	A	A	B	B	B	B	B	A	B
S4_23512308	4	71.73001	B	A	A	A	B	A	B	B	A	B	B	A	H	A	A	A	A	B	B	B	B	B	B	A	B	B	A	N	B	B	B	B	A	B	B	B	A	B	A	A	B	B	B	B	B	A	B
S4_23527346	4	71.74	N	A	A	A	B	A	N	B	A	B	B	A	A	A	A	A	A	B	B	H	B	B	B	A	B	N	A	A	B	B	N	B	A	B	N	B	A	B	A	A	B	B	B	N	B	A	B
S4_23527347	4	71.74001	N	A	A	A	B	A	N	B	A	B	B	A	A	A	A	A	A	B	B	H	B	B	B	A	B	N	A	A	B	B	N	B	A	B	N	B	A	B	A	A	B	B	B	N	B	A	B
S4_23532280	4	71.92	B	A	A	A	B	A	B	B	A	B	B	A	H	A	A	A	A	B	B	B	B	B	B	A	B	B	A	A	B	B	B	B	A	B	B	B	A	B	A	A	H	B	B	B	B	A	B
S4_23546397	4	71.95	B	A	A	A	B	A	B	B	A	B	B	A	H	A	A	A	A	B	B	B	B	B	B	A	B	B	A	A	B	B	B	B	A	B	B	B	A	B	A	A	B	B	B	B	B	A	B
S4_23580418	4	72.02	B	A	A	A	B	A	B	B	A	B	B	A	H	A	A	A	A	B	B	B	B	B	B	A	B	B	A	N	B	B	B	B	A	B	B	B	A	B	A	A	B	B	B	B	B	A	B
S4_23597460	4	72.08	B	A	A	A	B	A	B	B	A	B	B	A	H	A	A	A	A	B	B	B	B	B	B	A	B	B	A	A	B	B	B	B	A	B	B	B	A	B	A	A	B	B	B	B	B	A	B
S4_23597549	4	72.08001	B	A	A	A	B	A	B	B	A	B	B	A	H	A	A	A	A	B	B	B	B	B	B	A	B	B	A	A	B	B	B	B	A	B	B	B	A	B	A	A	B	B	B	B	B	A	B
S4_23597658	4	72.08002	B	A	A	A	B	A	B	B	A	B	B	A	H	A	A	A	A	B	B	B	B	B	B	A	B	B	A	A	B	B	B	B	A	B	B	B	A	B	A	A	B	B	B	B	B	A	B
S4_23609792	4	72.11001	B	A	A	A	B	A	B	B	A	B	B	A	H	A	A	A	A	B	B	B	B	B	B	A	B	B	A	A	B	B	B	B	A	B	B	B	A	B	A	A	B	B	B	B	B	A	B
S4_23609813	4	72.11002	B	A	A	A	B	A	B	B	A	B	B	A	H	A	A	A	A	B	B	B	B	B	B	A	B	B	A	A	B	B	B	B	A	B	B	B	A	B	A	A	B	B	B	B	B	A	H
S4_23629571	4	72.16	N	A	A	A	B	A	B	B	A	B	N	A	H	A	A	A	A	B	B	B	B	B	B	A	B	B	A	A	B	B	B	B	A	B	B	B	A	B	A	A	B	B	B	B	B	A	B
S4_23629657	4	72.16001	B	A	A	A	B	A	B	B	A	B	B	A	B	A	A	A	A	B	B	B	B	B	B	A	B	B	A	A	B	B	B	B	A	B	B	B	A	B	A	A	B	B	B	B	B	A	B
S4_23635694	4	72.16002	B	A	A	A	B	A	N	B	A	B	B	A	H	A	A	A	A	B	B	B	B	B	B	A	B	B	A	A	B	B	B	B	A	B	B	B	A	B	A	A	B	B	B	B	B	A	B
S4_23727732	4	72.5	B	A	A	A	B	A	B	B	A	B	B	A	H	A	A	A	A	B	B	B	B	B	B	A	B	B	A	A	B	B	B	B	A	B	B	B	A	B	A	A	B	B	B	B	B	A	B
S4_23747123	4	72.50001	B	A	A	A	B	A	B	B	A	B	B	A	H	A	A	A	A	B	B	B	B	B	B	A	B	B	A	A	B	B	B	B	A	B	B	B	A	B	A	A	B	B	B	B	B	A	B
S4_24013440	4	73.07	B	A	A	A	B	A	B	B	A	B	B	A	H	A	A	A	A	B	B	B	B	B	B	A	H	B	A	A	B	B	B	B	A	B	B	B	A	B	A	A	B	B	B	B	B	A	B
S4_24049446	4	73.07001	B	A	A	A	B	A	B	B	A	B	B	A	H	A	A	A	A	B	B	B	B	B	B	A	H	B	A	A	B	B	B	B	A	B	B	B	A	B	A	A	B	B	B	B	B	A	B
S4_24053641	4	73.07002	B	A	A	A	B	A	B	B	A	B	B	A	H	A	A	A	A	B	B	B	B	B	B	A	H	B	A	A	B	B	B	B	A	B	B	B	A	B	A	A	B	B	B	B	B	A	B
S4_24077148	4	73.07003	B	N	A	A	B	A	N	B	A	B	B	A	H	A	A	A	A	B	B	B	B	B	B	A	H	B	A	A	B	B	B	B	A	B	B	B	A	B	A	A	B	B	B	B	B	A	B
S4_24077242	4	73.07004	B	A	A	A	B	A	B	B	A	B	B	A	H	A	A	A	A	B	B	B	B	B	B	A	B	B	A	A	B	B	B	B	N	B	B	B	A	B	A	A	N	B	B	B	B	A	B
S4_24111091	4	73.07006	B	A	A	A	B	A	B	B	A	B	B	A	H	A	A	A	A	B	B	B	B	B	B	A	H	B	A	A	B	B	B	B	A	B	B	B	A	B	A	A	B	B	B	B	B	A	B
S4_24125812	4	73.07007	B	A	A	A	B	A	B	B	A	B	B	A	H	A	A	A	A	B	B	B	B	B	B	A	H	B	A	A	B	B	B	B	A	B	B	B	A	B	A	A	B	B	B	B	B	A	B
S4_27120040	4	84.24	B	A	A	A	B	A	B	B	A	B	B	A	H	A	A	A	B	B	B	B	B	B	B	A	H	B	A	H	B	B	B	B	A	B	B	B	A	B	A	A	B	B	B	B	B	A	B
S4_27195948	4	84.39	B	A	A	A	B	A	B	B	A	B	B	A	H	A	A	A	B	B	B	B	B	B	B	A	H	B	A	H	B	B	B	B	A	B	B	B	A	B	A	A	B	B	B	B	B	A	B
S4_27246913	4	84.46	B	A	A	A	B	A	B	B	A	B	B	A	H	A	A	A	B	B	B	B	B	B	B	A	H	B	A	H	B	B	B	B	A	B	B	B	A	B	A	A	B	B	B	B	B	A	B
S4_27246924	4	84.46001	B	A	A	A	B	A	B	B	A	B	B	A	H	A	A	A	B	B	B	B	B	B	B	A	H	B	A	H	B	B	B	B	A	B	B	B	A	B	A	A	B	B	B	B	B	A	B
S4_27247058	4	84.46002	B	A	A	A	B	A	B	B	A	B	B	A	H	A	A	A	B	B	B	B	B	B	B	A	H	B	A	H	B	B	B	B	A	B	B	B	A	B	A	A	B	B	B	B	B	A	B
S4_27346215	4	86	B	A	A	A	B	A	B	B	A	B	B	A	H	A	A	A	B	B	B	B	B	B	B	A	H	B	A	H	B	B	B	B	A	B	B	B	A	B	A	A	B	B	B	B	B	A	B
S4_27398418	4	86.48	B	A	A	A	B	A	B	B	A	B	B	A	H	A	A	A	B	B	B	B	B	B	B	A	H	B	A	H	B	B	B	B	A	B	B	B	A	B	A	A	B	B	B	B	B	A	B
S4_27410664	4	86.53	B	N	N	A	B	A	B	B	A	B	B	A	B	A	A	A	B	B	B	B	B	B	B	A	B	B	A	H	B	B	B	B	A	B	B	B	A	B	A	A	B	B	B	B	B	A	B
S4_27413321	4	86.53001	B	A	A	A	B	A	B	B	A	B	B	A	H	A	A	A	B	B	B	B	B	B	B	A	H	B	A	H	B	B	B	B	A	B	B	B	A	B	A	A	B	B	B	B	B	A	B
S4_27415892	4	86.53002	B	A	A	A	B	A	B	B	A	B	B	A	H	A	A	A	B	B	B	B	B	B	B	A	H	B	A	H	B	B	B	B	A	B	B	B	A	B	A	A	B	B	B	B	B	A	B
S4_27421194	4	86.53003	B	A	A	A	B	A	B	B	A	B	B	A	H	A	A	A	B	B	B	B	B	B	B	A	A	B	A	H	B	B	B	B	A	B	B	B	A	B	A	N	B	B	B	B	B	A	B
S4_27425942	4	86.53004	B	A	A	A	B	A	B	B	A	B	B	A	H	A	A	A	B	B	B	B	B	B	B	A	H	B	A	H	B	B	B	B	A	B	B	B	A	B	A	A	B	B	B	B	B	A	B
S4_27444465	4	86.95	B	A	A	A	B	A	B	B	A	B	B	A	H	A	A	A	B	B	B	B	B	B	B	A	H	B	A	H	B	B	N	B	A	B	B	B	A	B	A	A	B	B	B	B	B	A	B
S4_27444527	4	86.95001	B	A	A	A	B	A	B	B	A	B	B	A	H	A	A	A	B	B	B	B	B	B	B	A	H	B	A	H	B	B	B	B	A	B	B	B	A	B	A	A	B	B	B	B	B	A	B
S4_27445051	4	86.95002	B	N	A	A	B	A	B	B	A	B	B	A	H	A	A	A	B	B	B	B	B	B	B	A	A	B	A	B	B	B	B	B	A	B	B	B	A	B	A	A	B	B	B	B	B	A	B
S4_27482499	4	87.47	B	A	A	A	B	A	B	B	A	B	B	A	H	A	A	A	B	B	B	B	B	B	B	A	H	B	A	H	B	B	B	B	A	B	B	B	A	B	A	A	B	B	B	B	B	A	B
S4_27517819	4	87.9	B	A	A	A	B	A	B	B	A	B	B	A	H	A	A	A	B	B	B	B	B	B	B	A	H	B	A	H	B	B	B	B	A	B	B	B	A	B	A	A	B	B	B	B	B	A	B
S4_27537264	4	88.03	B	A	N	A	B	A	B	B	A	B	B	A	H	A	A	A	B	B	B	B	B	B	B	A	H	B	A	B	B	N	B	B	A	B	B	B	A	B	A	A	B	B	B	B	B	A	B
S4_27537294	4	88.03001	B	A	N	A	B	A	B	B	A	B	B	A	H	A	A	A	B	B	B	B	B	B	B	A	H	B	A	B	B	N	B	B	A	B	B	B	A	B	A	A	B	B	B	B	B	A	B
S4_27537311	4	88.03002	B	A	N	A	B	A	B	B	A	B	B	A	H	A	A	A	B	B	B	B	B	B	B	A	H	B	A	B	B	N	B	B	A	B	B	B	A	B	A	A	B	B	B	B	B	A	B
S4_27540321	4	88.03003	B	A	A	A	B	A	B	B	A	B	B	A	H	A	A	A	B	B	B	B	B	B	B	A	H	B	A	H	B	B	B	B	A	B	B	B	A	B	A	A	B	B	B	B	B	A	B
S4_27568734	4	88.14	B	H	A	A	B	A	B	B	A	B	B	A	H	A	A	A	B	B	B	B	B	B	B	A	H	B	A	H	B	B	B	B	A	B	B	B	A	B	A	A	B	B	B	B	B	A	B
S4_27611594	4	88.36	B	A	A	A	B	A	B	B	A	B	B	A	H	A	A	A	B	B	B	B	B	B	B	A	H	B	A	H	B	B	B	B	A	B	B	B	H	B	A	A	B	B	B	B	B	A	B
S4_27614988	4	88.42	B	A	A	A	B	A	B	B	A	B	B	A	H	A	A	A	B	B	B	B	B	B	B	A	H	B	A	H	B	B	B	B	A	B	B	B	A	B	A	A	B	B	B	B	B	A	B
S4_27617633	4	88.42001	B	A	A	A	B	A	B	B	A	B	B	A	H	A	A	A	B	B	B	B	B	B	B	A	H	B	A	H	B	B	B	B	A	B	B	B	A	B	A	A	B	B	B	B	B	A	B
S4_27656973	4	89.05	B	A	A	A	B	A	B	B	A	B	B	A	B	A	A	A	B	B	B	B	B	B	B	A	H	B	A	H	B	B	B	B	A	B	B	B	A	B	A	A	B	B	B	B	B	A	B
S4_27662613	4	89.05001	B	A	A	A	B	A	B	B	A	B	B	A	B	A	A	A	B	B	B	B	B	B	B	A	H	B	A	H	B	B	B	B	A	B	B	B	A	B	A	A	B	B	B	B	B	A	B
S4_27666787	4	89.05002	B	A	A	A	B	A	B	B	A	B	B	A	B	A	A	A	B	B	B	B	B	B	B	A	H	B	A	H	B	B	B	B	A	B	B	B	A	B	A	A	B	B	B	B	B	A	B
S4_27677662	4	89.06	N	A	A	A	B	A	B	B	A	B	B	A	B	A	A	A	B	B	B	B	B	B	B	A	A	B	A	H	B	B	B	B	A	B	N	B	A	B	A	A	B	B	B	B	B	A	B
S4_27677667	4	89.06001	N	A	A	A	B	A	B	B	A	B	B	A	B	A	A	A	B	B	B	B	B	B	B	A	A	B	A	H	B	B	B	B	A	B	N	B	A	B	A	A	B	B	B	B	B	A	B
S4_27678052	4	89.06002	B	A	A	A	B	A	B	B	A	B	B	A	B	A	A	A	B	B	B	B	B	B	B	A	H	B	A	H	B	B	B	B	A	B	B	B	A	B	A	A	B	B	B	B	B	A	B
S4_27679248	4	89.06003	B	A	A	A	B	A	B	B	A	B	B	A	B	A	A	A	B	B	B	B	B	B	B	A	H	B	A	H	B	B	B	B	A	B	B	B	A	B	A	A	B	B	B	B	B	A	B
S4_27756555	4	89.35	B	A	A	A	B	A	B	B	A	B	B	A	B	A	A	A	B	B	B	B	B	B	B	A	H	B	A	H	B	B	B	B	A	B	B	B	A	B	A	A	B	B	B	B	B	A	B
S4_27764000	4	89.35001	B	A	A	A	B	A	B	B	A	B	B	A	B	A	A	A	B	B	B	B	B	B	B	A	H	B	A	H	B	B	B	B	A	B	B	B	A	B	A	A	B	B	B	B	B	A	B
S4_27860472	4	89.77	B	N	A	A	B	N	B	B	A	B	B	A	B	A	A	A	B	B	B	B	B	B	B	N	H	N	A	H	B	B	B	B	A	B	B	B	A	B	A	A	B	B	B	B	B	A	B
S4_27860663	4	89.77001	B	A	A	A	B	A	B	B	A	B	B	A	B	A	A	A	B	B	B	B	B	B	B	A	H	B	A	H	B	B	B	B	A	B	B	B	A	B	A	A	B	B	B	B	B	A	B
S4_28026225	4	90.69	B	A	A	A	B	A	B	B	A	B	B	A	B	A	A	A	B	B	B	B	B	B	B	A	H	B	A	H	B	B	B	B	A	B	B	B	A	B	A	A	B	B	B	B	B	A	B
S4_28557510	4	95.09	B	A	A	A	B	A	B	B	A	B	B	A	B	A	A	A	B	B	B	B	B	B	B	A	H	B	A	H	B	B	B	B	A	B	B	B	A	B	A	A	B	B	B	B	B	A	B
S4_28571899	4	95.17	B	A	A	A	B	A	B	B	A	B	B	A	B	A	A	A	B	B	B	B	B	B	B	A	H	B	A	H	B	B	B	B	A	B	B	B	A	B	A	A	B	B	B	B	B	A	B
S4_28597607	4	95.31	B	A	A	A	B	A	B	B	A	B	B	A	B	A	A	A	B	B	B	B	B	B	B	A	H	B	A	B	B	B	B	B	A	B	B	B	A	B	A	A	B	B	B	B	B	A	B
S4_28644026	4	95.53	B	A	A	A	B	A	B	B	A	B	B	A	B	A	A	A	B	B	B	B	B	B	B	A	H	B	A	H	B	B	B	B	A	B	B	B	A	B	A	A	B	B	B	B	B	A	B
S4_28689835	4	95.72	B	A	N	A	B	A	B	B	A	B	B	A	B	A	A	A	B	B	B	B	B	B	B	A	A	B	A	H	B	B	B	B	A	B	B	B	A	B	A	A	B	B	B	B	B	A	B
S4_28742183	4	96.19001	N	A	A	A	B	A	B	B	A	B	B	A	B	A	A	A	B	B	B	B	B	B	B	A	H	B	A	H	B	B	B	B	A	B	B	B	A	B	A	A	B	B	B	B	B	A	B
S4_28742243	4	96.19002	B	A	A	A	B	A	B	B	A	B	B	A	B	A	A	A	B	B	B	B	B	B	B	A	H	B	A	H	B	B	B	B	A	B	B	B	A	B	A	A	B	B	B	B	B	A	B
S4_29318384	4	98	B	A	A	A	B	A	B	B	A	B	B	A	B	A	A	A	B	B	B	B	B	B	B	A	H	B	A	H	B	B	B	B	A	B	B	B	A	B	A	A	B	B	B	B	B	A	B
S4_29324426	4	98.01	N	A	A	A	B	A	B	B	A	B	B	A	B	A	A	A	B	B	B	B	B	B	B	A	H	B	A	B	B	B	B	B	A	B	B	B	A	B	A	A	B	B	B	B	B	A	B
S4_29324427	4	98.01001	N	A	A	A	B	A	B	B	A	B	B	A	B	A	A	A	B	B	B	B	B	B	B	A	H	B	A	B	B	B	B	B	A	B	B	B	A	B	A	A	B	B	B	B	B	A	B
S4_29324429	4	98.01002	N	A	A	A	B	A	B	B	A	B	B	A	B	A	A	A	B	B	B	B	B	B	B	A	H	B	A	B	B	B	B	B	A	B	B	B	A	B	A	A	B	B	B	B	B	A	B
S4_29324430	4	98.01003	N	A	A	A	B	A	B	B	A	B	B	A	B	A	A	A	B	B	B	B	B	B	B	A	H	B	A	B	B	B	H	B	A	B	B	B	A	B	A	A	B	B	B	B	B	A	B
S4_29346826	4	98.06	B	A	A	A	B	A	B	B	A	B	B	A	B	A	A	A	B	B	B	B	B	B	B	A	H	B	A	H	B	B	B	B	A	B	B	B	A	B	A	A	B	B	B	B	B	A	B
S4_29347472	4	98.06001	B	A	A	A	B	A	B	B	A	B	B	A	B	A	A	A	B	B	B	B	B	B	B	A	H	B	A	H	B	B	B	B	A	B	B	B	A	B	A	A	B	B	B	B	B	A	B
S4_29409611	4	98.31	B	A	A	A	B	A	B	B	A	B	B	A	B	A	A	A	B	B	B	B	B	B	B	A	H	B	A	H	B	B	B	B	A	B	B	B	A	B	A	A	B	B	B	B	B	A	B
S4_29492908	4	98.62	B	A	A	A	B	A	B	B	A	B	B	A	B	A	A	A	B	B	B	B	B	B	B	A	H	B	A	H	B	B	B	B	A	B	B	B	A	B	A	A	B	B	B	B	B	A	B
S4_29504977	4	98.70001	B	A	A	A	B	A	B	B	A	B	B	A	B	A	A	A	B	B	B	B	B	B	B	A	H	B	A	H	B	B	B	B	A	B	B	B	A	B	A	A	B	B	B	B	B	A	B
S4_29534398	4	99.04	B	A	A	A	B	N	B	B	A	B	B	A	B	A	A	A	B	N	B	B	B	B	B	A	H	B	A	B	B	B	B	B	A	B	B	B	A	B	A	A	B	B	B	B	B	A	B
S4_29548704	4	99.29	B	A	A	A	B	A	B	B	A	B	B	A	B	A	A	A	B	B	B	B	B	B	B	A	H	B	A	H	B	B	B	B	A	B	B	B	A	B	A	A	B	B	B	B	B	A	B
S4_29548991	4	99.29001	B	A	A	A	B	A	B	B	A	B	B	A	B	A	A	A	B	B	B	B	B	B	B	A	H	B	A	H	B	B	B	B	A	B	B	B	A	B	A	A	B	B	B	B	B	A	B
S4_29562992	4	99.41	B	A	A	A	B	A	B	B	A	B	B	A	B	A	A	A	B	B	B	B	B	B	B	A	H	B	A	H	B	B	B	B	A	B	B	B	A	B	A	A	B	B	B	B	B	A	B
S4_29641352	4	100.12	B	A	A	A	B	A	B	B	A	B	B	A	B	A	A	A	B	B	B	B	B	B	B	A	H	B	A	H	B	B	B	B	A	B	B	B	A	B	A	A	B	B	B	B	B	A	B
S4_29641355	4	100.12001	B	A	A	A	B	A	B	B	A	B	B	A	B	A	A	A	B	B	B	B	B	B	B	A	H	B	A	H	B	B	B	B	A	B	B	B	A	B	A	A	B	B	B	B	B	A	B
S4_29641358	4	100.12002	B	A	A	A	B	A	B	B	A	B	B	A	B	A	A	A	B	B	B	B	B	B	B	A	H	B	A	H	B	B	B	B	A	B	B	B	A	B	A	A	B	B	B	B	B	A	B
S4_29642709	4	100.12003	B	A	A	A	B	A	B	B	A	B	B	A	B	A	A	A	B	B	B	B	B	B	B	A	H	B	A	H	B	B	B	B	A	B	B	B	A	B	A	A	B	B	B	B	B	A	B
S4_29658408	4	100.12004	B	A	A	A	B	A	B	B	A	B	B	A	B	A	A	A	B	B	B	B	B	B	B	A	H	B	A	H	B	B	B	B	A	B	B	B	A	B	A	A	B	B	B	B	B	A	B
S4_29663213	4	100.21	B	A	A	A	B	A	B	B	A	B	B	A	B	A	A	A	B	B	B	B	B	B	B	A	H	B	A	H	B	B	B	B	A	B	B	B	A	B	A	A	B	B	B	B	B	A	B
S4_29764041	4	100.39002	B	A	A	A	B	A	B	B	A	B	B	A	B	A	N	A	B	B	B	B	B	B	B	A	H	B	A	B	B	B	B	B	N	B	B	B	A	B	A	A	B	B	B	B	B	A	B
S4_29795318	4	100.45	B	A	A	A	B	N	B	N	A	B	B	A	B	A	A	A	B	B	B	B	B	B	B	A	A	B	A	N	B	B	B	B	A	B	B	B	A	B	A	A	B	B	B	B	B	A	B
S4_29797214	4	100.45001	B	A	A	A	B	A	B	B	A	B	B	A	B	A	A	A	B	B	B	B	B	B	B	A	H	B	A	H	B	B	B	B	A	B	B	B	A	B	A	A	B	B	B	B	B	A	B
S4_29803098	4	100.45002	B	A	A	A	B	A	B	B	A	B	B	A	B	A	A	A	B	B	B	B	B	B	B	A	H	B	A	H	B	B	B	B	A	B	B	B	A	B	A	A	B	B	B	B	B	A	B
S4_29803452	4	100.45003	B	A	A	A	B	A	B	B	A	B	B	A	B	A	A	A	B	B	B	B	B	B	B	A	H	B	A	H	B	B	B	B	A	B	B	B	A	B	A	A	B	B	B	B	B	A	B
S4_29817523	4	100.51	B	A	A	A	B	A	B	B	A	H	B	A	B	A	A	A	B	B	B	B	B	B	B	A	H	B	A	H	B	B	B	B	A	B	B	B	A	B	A	A	B	B	B	B	B	A	B
S4_29817535	4	100.51001	B	A	A	A	B	A	B	B	A	H	B	A	B	A	A	A	B	B	B	B	B	B	B	A	H	B	A	H	B	B	B	B	A	B	B	B	A	B	A	A	B	B	B	B	B	A	B
S4_29817550	4	100.51002	B	A	A	A	B	A	B	B	A	H	B	A	B	A	A	A	B	B	B	B	B	B	B	A	H	B	A	H	B	B	B	B	A	B	B	B	A	B	A	A	B	B	B	B	B	A	B
S4_29832522	4	100.54	B	A	A	A	B	A	B	B	A	B	B	A	B	A	A	A	B	B	B	B	B	B	B	A	H	B	A	H	B	B	B	B	A	B	B	B	A	B	A	A	B	B	B	B	B	A	B
S4_29839574	4	100.55	B	A	A	A	B	A	B	B	A	B	B	A	B	A	A	A	B	B	B	B	B	B	B	A	H	B	A	H	B	B	B	B	A	B	B	B	A	B	A	A	B	B	B	B	B	A	B
S4_29848759	4	100.56	B	A	A	A	B	A	B	B	A	B	B	A	B	A	A	A	B	B	B	B	B	B	B	A	H	B	A	H	B	B	B	B	A	B	B	B	A	B	A	A	B	B	B	B	B	A	B
S4_29866691	4	101.15	B	A	A	A	B	A	B	B	A	B	B	A	B	A	A	A	B	B	B	B	B	B	B	A	H	B	A	A	B	B	B	B	A	B	B	B	A	B	A	A	B	B	B	B	B	A	B
S4_29868104	4	101.15001	B	A	A	A	B	A	B	B	A	B	B	A	B	A	A	A	B	B	B	B	B	B	B	A	H	B	A	H	B	B	B	B	A	B	B	B	A	B	A	A	B	B	B	B	B	A	B
S4_29922917	4	101.2	B	A	A	A	B	A	B	B	A	B	B	A	B	A	A	A	B	B	B	B	B	B	B	A	H	B	A	H	B	B	B	B	A	B	B	B	A	B	A	A	B	B	N	B	B	A	B
S4_29954830	4	101.24	B	A	A	A	B	A	B	B	A	B	B	A	B	A	A	A	B	B	B	B	B	B	B	A	H	B	A	B	B	B	B	B	A	B	B	B	A	B	A	A	B	B	B	B	B	A	B
S4_29965442	4	101.24001	B	A	A	A	B	A	B	B	A	B	B	A	B	A	A	A	B	B	B	B	B	B	B	A	H	B	A	H	B	B	B	B	A	B	B	B	A	B	A	A	B	B	B	B	B	A	B
S4_29965891	4	101.24002	B	A	A	A	B	A	B	B	A	B	B	A	B	A	A	A	B	B	B	B	B	B	B	A	H	B	A	A	B	B	B	B	A	B	B	B	A	B	A	A	B	B	B	B	B	A	B
S4_29968457	4	101.24003	B	A	A	A	B	A	B	B	A	B	B	A	B	A	A	A	B	B	B	B	B	B	B	A	H	B	A	H	B	B	B	B	A	B	B	B	A	B	A	A	B	B	B	B	B	A	B
S4_29968490	4	101.24004	B	A	A	A	B	A	B	B	A	B	B	A	B	A	A	A	B	B	B	B	B	B	B	A	H	B	A	H	B	B	B	B	A	B	B	B	A	B	A	A	B	B	B	B	B	A	B
S4_30808550	4	103.52	B	A	A	A	B	A	B	B	A	B	B	A	B	A	A	A	B	B	B	B	B	B	B	A	H	B	A	H	B	B	B	B	A	A	B	B	A	B	A	A	A	B	B	B	B	A	B
S4_30883558	4	103.61	B	A	A	A	B	A	B	B	A	B	B	A	B	A	A	A	B	B	B	B	B	B	B	A	H	B	A	H	B	B	B	B	A	A	B	B	H	B	A	A	A	B	B	B	B	A	B
S4_30996118	4	105.14	B	A	A	A	B	A	B	B	A	B	B	A	B	A	A	A	B	B	B	B	B	B	B	A	H	B	A	H	B	B	B	A	A	A	B	B	H	B	A	A	A	B	B	B	B	A	B
S4_31002482	4	105.14001	B	A	A	A	B	A	B	B	A	B	B	A	B	A	A	A	B	B	B	B	B	B	B	A	B	B	A	A	B	B	B	A	A	A	B	B	H	B	A	A	A	B	B	B	B	A	B
S4_31080152	4	106.02	B	A	A	A	B	A	B	B	A	B	B	A	B	A	A	A	B	B	B	B	B	B	B	A	H	B	A	H	B	B	B	A	A	A	B	B	H	B	H	A	A	B	H	B	B	A	B
S4_31080257	4	106.02001	B	A	A	A	B	A	B	B	A	B	B	A	B	A	A	A	B	B	B	B	B	B	B	A	H	B	A	H	B	B	B	A	A	A	B	B	H	B	A	A	A	B	B	B	B	A	B
S4_31082743	4	106.02002	B	A	A	A	B	A	B	B	A	B	B	A	N	A	A	A	B	B	B	B	B	B	B	A	H	B	A	H	B	B	B	A	A	N	B	B	H	B	A	A	A	B	B	B	B	A	B
S4_31091534	4	106.02003	B	A	A	A	B	A	B	B	A	B	B	A	B	A	A	A	B	B	B	B	B	B	B	A	H	B	A	H	B	B	B	A	A	A	B	B	H	B	A	A	A	B	B	B	B	A	B
S4_31091552	4	106.02004	B	A	A	A	B	A	B	B	A	B	B	A	B	A	A	A	B	B	B	B	B	B	B	A	H	B	A	H	B	B	B	A	A	A	B	B	H	B	A	A	A	B	B	B	B	A	B
S4_31127313	4	106.22	B	A	A	A	B	A	B	B	A	B	B	A	B	A	A	A	B	B	B	B	B	B	B	A	H	B	A	H	B	B	B	A	A	A	B	B	H	B	A	A	A	B	B	B	B	A	B
S4_31243064	4	106.33	B	A	A	A	B	A	B	B	A	A	B	A	B	A	A	A	B	B	B	B	B	B	B	A	H	B	A	H	B	B	B	A	A	A	B	B	H	B	A	A	A	B	B	B	B	A	B
S4_31250082	4	106.33001	B	A	A	A	B	A	B	B	A	A	B	A	B	A	A	A	B	B	B	B	B	H	B	A	H	B	A	B	B	B	B	A	A	A	B	B	H	B	A	A	A	B	B	B	B	A	B
S4_31390254	4	107.39	B	A	A	A	B	A	B	B	A	A	B	A	B	A	A	A	B	B	B	B	B	B	B	A	H	B	A	H	B	B	B	A	A	A	B	B	H	B	A	A	A	B	B	B	B	A	B
S4_31390275	4	107.39001	B	A	A	A	B	A	B	B	A	A	B	A	B	A	A	A	B	B	B	B	B	B	B	A	H	B	A	H	B	B	B	A	A	A	B	B	H	B	A	A	A	B	B	B	B	A	B
S4_31395090	4	107.39002	B	A	A	A	B	A	B	B	A	A	B	A	B	A	A	A	B	B	B	B	B	B	B	A	H	B	A	H	B	B	B	A	A	A	B	B	H	B	A	A	A	B	B	B	B	A	B
S4_31395102	4	107.39003	H	A	A	A	B	A	B	B	A	A	B	A	B	A	A	A	B	B	B	B	B	B	B	A	H	B	A	H	B	B	B	A	A	A	B	B	H	B	A	A	A	B	B	B	B	A	B
S4_31402485	4	107.46	B	A	A	A	B	A	B	B	A	A	B	A	B	A	A	A	B	B	B	B	B	B	B	A	H	B	A	H	B	B	B	A	A	A	B	B	H	B	A	A	A	B	B	B	B	A	B
S4_31410708	4	107.5	B	A	A	A	B	A	B	B	A	A	B	A	B	A	A	A	B	B	B	B	B	B	B	A	H	B	A	H	B	B	B	A	A	A	B	B	H	B	A	A	A	B	B	B	B	A	B
S4_31442913	4	107.93001	B	A	A	A	B	B	B	B	A	A	B	A	B	A	A	A	B	B	B	B	B	B	B	A	H	B	A	H	B	B	B	A	A	A	B	B	H	B	A	A	A	B	B	B	B	A	B
[truncated: 2,734 more rows]
[truncated: 130 more columns]
